# Supplementary material for: Restoration of Natural Killer Cell Antimetastatic Activity by IL12 and Checkpoint Blockade
Source: Oxford University Press journal article supplement (doi:10.1158/0008-5472.can-17-1032), 2017-10-17
Supplement: 00085472can171032-sup-181618_2_supp_4319488_pxk9hp.xls [file 00085472can171032-sup-181618_2_supp_4319488_pxk9hp.xls]

## Sheet: Supp.TableS1(DeSeq2_res_d10vsd2
Gene_name	Ens_ID	d10.17.20	d10.1.8	d10.21.25	d10.9.16	d20.1.8	d20.27.30	d20.31.34	log2FoldChange	pvalue	padj	Description
St5	ENSMUSG00000031024.9	18105.4	17131.6	13376.9	15577.7	3774.13	3500.14	3357.76	2.03251	9.5e-68	1.16e-63	suppression of tumorigenicity 5 [Source:MGI Symbol;Acc:MGI:108517]
Tigit	ENSMUSG00000071552.4	465.474	421.022	445.967	502.602	1289.96	1595.89	1316.57	-1.49681	2.02e-33	1.23e-29	T cell immunoreceptor with Ig and ITIM domains [Source:MGI Symbol;Acc:MGI:3642260]
Prr5l	ENSMUSG00000032841.12	5226.61	5333.27	4856.9	5200.15	8591.62	10042.9	9335.68	-0.834722	3.38e-25	1.37e-21	proline rich 5 like [Source:MGI Symbol;Acc:MGI:1919696]
Parm1	ENSMUSG00000034981.9	572.891	525.062	545.541	454.123	95.7535	125.148	64.9471	1.92119	2.62e-23	7.97e-20	prostate androgen-regulated mucin-like protein 1 [Source:MGI Symbol;Acc:MGI:2443349]
Car5b	ENSMUSG00000031373.4	3503.84	3245.66	3299.73	3191.72	5227.6	4999.91	5177.21	-0.627062	2.25e-22	5.49e-19	carbonic anhydrase 5b, mitochondrial [Source:MGI Symbol;Acc:MGI:1926249]
Slc37a2	ENSMUSG00000032122.11	1533.51	1711.31	1400.4	1511.76	2673.87	3039.59	2872.52	-0.857109	1.57e-17	3.19e-14	solute carrier family 37 (glycerol-3-phosphate transporter), member 2 [Source:MGI Symbol;Acc:MGI:1929693]
Chit1	ENSMUSG00000026450.11	116.624	130.293	88.9815	178.087	590.781	536.634	538.133	-1.64384	9.72e-17	1.69e-13	chitinase 1 (chitotriosidase) [Source:MGI Symbol;Acc:MGI:1919134]
Cyp11a1	ENSMUSG00000032323.10	61.3812	41.8105	78.3884	52.4368	583.555	319.377	281.128	-1.76537	9.54e-15	1.45e-11	cytochrome P450, family 11, subfamily a, polypeptide 1 [Source:MGI Symbol;Acc:MGI:88582]
Dusp22	ENSMUSG00000069255.9	707.93	865.38	886.637	964.64	1753.37	1670.97	1565.22	-0.897889	1.01e-13	1.37e-10	dual specificity phosphatase 22 [Source:MGI Symbol;Acc:MGI:1915926]
Tacc3	ENSMUSG00000037313.13	817.393	829.404	935.365	925.065	1378.49	1382.63	1548.52	-0.688472	4.33e-13	5.27e-10	transforming, acidic coiled-coil containing protein 3 [Source:MGI Symbol;Acc:MGI:1341163]
Plp2	ENSMUSG00000031146.6	1887.47	2133.31	2040.22	1904.55	2882.54	2901.43	2864.17	-0.526505	5.4e-13	5.98e-10	proteolipid protein 2 [Source:MGI Symbol;Acc:MGI:1298382]
Cdk1	ENSMUSG00000019942.9	174.936	155.574	204.445	217.662	547.421	414.49	520.505	-1.19438	1.32e-12	1.34e-09	cyclin-dependent kinase 1 [Source:MGI Symbol;Acc:MGI:88351]
Il27ra	ENSMUSG00000005465.8	7628.66	8116.1	7086.74	7219.46	10467.8	11492.6	10978.8	-0.537086	6.67e-12	6.25e-09	interleukin 27 receptor, alpha [Source:MGI Symbol;Acc:MGI:1355318]
Itgax	ENSMUSG00000030789.8	1677.75	1619.91	1793.4	2355.7	3782.26	4064.8	5884.21	-1.12049	1.08e-11	9.41e-09	integrin alpha X [Source:MGI Symbol;Acc:MGI:96609]
Otud1	ENSMUSG00000043415.5	4915.61	4536.93	4640.81	4571.9	3439	3449.07	3244.57	0.451111	1.81e-11	1.47e-08	OTU domain containing 1 [Source:MGI Symbol;Acc:MGI:1918448]
Lag3	ENSMUSG00000030124.2	40.9208	29.1701	54.0245	54.4156	177.054	170.201	197.625	-1.43986	2.51e-11	1.91e-08	lymphocyte-activation gene 3 [Source:MGI Symbol;Acc:MGI:106588]
Myb	ENSMUSG00000019982.11	248.594	283.922	359.104	336.387	756.092	678.802	1088.33	-1.20356	3.05e-11	2.19e-08	myeloblastosis oncogene [Source:MGI Symbol;Acc:MGI:97249]
Mki67	ENSMUSG00000031004.7	460.359	666.051	820.96	641.114	1771.44	1361.61	2054.18	-1.18286	3.82e-11	2.47e-08	antigen identified by monoclonal antibody Ki 67 [Source:MGI Symbol;Acc:MGI:106035]
Limd2	ENSMUSG00000040699.10	14586.2	15356.1	12581.3	14526	20551.8	22481.6	22442.9	-0.5952	3.85e-11	2.47e-08	LIM domain containing 2 [Source:MGI Symbol;Acc:MGI:1915053]
Nfe2	ENSMUSG00000058794.9	538.108	598.96	656.768	561.965	1009.03	1012.2	926.888	-0.705508	4.86e-11	2.96e-08	nuclear factor, erythroid derived 2 [Source:MGI Symbol;Acc:MGI:97308]
S100a11	ENSMUSG00000027907.4	2657.8	3098.84	3227.7	2768.27	4703.67	4298.08	4366.3	-0.585401	5.67e-11	3.29e-08	S100 calcium binding protein A11 (calgizzarin) [Source:MGI Symbol;Acc:MGI:1338798]
Anxa1	ENSMUSG00000024659.11	20595.4	21360.3	19489.1	21638.6	28565.3	27274.2	30926.9	-0.471048	7.42e-11	4.11e-08	annexin A1 [Source:MGI Symbol;Acc:MGI:96819]
Ccl9	ENSMUSG00000019122.8	2480.82	1928.14	2613.3	2244.89	4696.44	4033.77	3786.42	-0.793241	1.56e-10	8.28e-08	chemokine (C-C motif) ligand 9 [Source:MGI Symbol;Acc:MGI:104533]
Inpp5b	ENSMUSG00000028894.15	9992.86	9399.58	9269.96	9929.36	12376.6	13167.6	12673	-0.39917	1.67e-10	8.47e-08	inositol polyphosphate-5-phosphatase B [Source:MGI Symbol;Acc:MGI:103257]
Klra5	ENSMUSG00000030173.12	613.812	661.189	557.193	717.296	1260.15	1515.79	1105.96	-0.920563	2.06e-10	1e-07	killer cell lectin-like receptor, subfamily A, member 5 [Source:MGI Symbol;Acc:MGI:101903]
Gapdh	ENSMUSG00000057666.15	15320.7	17064.5	16387.4	16286.1	20532.8	20367.1	20964	-0.343593	2.46e-10	1.15e-07	glyceraldehyde-3-phosphate dehydrogenase [Source:MGI Symbol;Acc:MGI:95640]
Ldha	ENSMUSG00000063229.11	31290.1	32973.9	32349	30517.2	39419.7	40642	38997	-0.322504	3.32e-10	1.45e-07	lactate dehydrogenase A [Source:MGI Symbol;Acc:MGI:96759]
Rad51	ENSMUSG00000027323.7	268.031	295.591	246.818	245.365	490.511	473.559	538.133	-0.846449	3.34e-10	1.45e-07	RAD51 homolog [Source:MGI Symbol;Acc:MGI:97890]
Hes1	ENSMUSG00000022528.7	3015.86	2074.97	3501	2138.04	1251.12	988.167	1059.57	1.076	4.43e-10	1.86e-07	hairy and enhancer of split 1 (Drosophila) [Source:MGI Symbol;Acc:MGI:104853]
Samsn1	ENSMUSG00000022876.14	7092.59	6448.54	6525.31	7031.48	8783.13	9756.53	9490.63	-0.457565	4.76e-10	1.93e-07	SAM domain, SH3 domain and nuclear localization signals, 1 [Source:MGI Symbol;Acc:MGI:1914992]
Tnfrsf9	ENSMUSG00000028965.10	4339.65	4917.11	5505.2	5642.4	7578.98	7804.22	8534.98	-0.6198	8.55e-10	3.36e-07	tumor necrosis factor receptor superfamily, member 9 [Source:MGI Symbol;Acc:MGI:1101059]
Anxa8	ENSMUSG00000021950.12	339.643	412.271	355.926	542.177	1011.74	1086.28	838.745	-1.05253	1.55e-09	5.89e-07	annexin A8 [Source:MGI Symbol;Acc:MGI:1201374]
Kcnk10	ENSMUSG00000033854.9	99.2329	111.819	103.812	67.2774	280.034	243.287	268.139	-1.16451	1.68e-09	6.2e-07	potassium channel, subfamily K, member 10 [Source:MGI Symbol;Acc:MGI:1919508]
Cnp	ENSMUSG00000006782.13	6778.53	7285.72	6837.8	6700.04	8542.84	9001.63	9407.12	-0.378933	2.36e-09	8.47e-07	2',3'-cyclic nucleotide 3' phosphodiesterase [Source:MGI Symbol;Acc:MGI:88437]
Ncapg	ENSMUSG00000015880.10	138.108	126.404	206.564	133.566	437.214	375.444	359.992	-1.11461	2.87e-09	9.98e-07	non-SMC condensin I complex, subunit G [Source:MGI Symbol;Acc:MGI:1930197]
Top2a	ENSMUSG00000020914.14	887.981	991.784	1228.79	881.532	2068.64	1662.96	2570.98	-0.942878	2.98e-09	1.01e-06	topoisomerase (DNA) II alpha [Source:MGI Symbol;Acc:MGI:98790]
Ckap2l	ENSMUSG00000048327.6	119.693	140.989	195.971	140.491	342.364	363.429	475.042	-1.12611	3.13e-09	1.03e-06	cytoskeleton associated protein 2-like [Source:MGI Symbol;Acc:MGI:1917716]
E2f8	ENSMUSG00000046179.14	39.8978	24.3084	65.6768	31.66	205.96	192.227	170.718	-1.36663	3.61e-09	1.16e-06	E2F transcription factor 8 [Source:MGI Symbol;Acc:MGI:1922038]
Fgr	ENSMUSG00000028874.11	1398.47	1837.72	1586.84	1976.77	2904.22	2812.32	3327.15	-0.763166	5.01e-09	1.57e-06	Gardner-Rasheed feline sarcoma viral (Fgr) oncogene homolog [Source:MGI Symbol;Acc:MGI:95527]
Dmrta1	ENSMUSG00000043753.2	1051.66	754.534	720.326	878.564	361.334	345.408	198.553	1.15093	5.96e-09	1.81e-06	doublesex and mab-3 related transcription factor like family A1 [Source:MGI Symbol;Acc:MGI:2653627]
Fosl1	ENSMUSG00000024912.5	72.6344	43.7552	90.0408	78.1606	270.097	194.229	290.406	-1.27091	6.51e-09	1.93e-06	fos-like antigen 1 [Source:MGI Symbol;Acc:MGI:107179]
Shisa5	ENSMUSG00000025647.13	70929	68519.6	60888.7	64409.2	87222.4	99106.1	93743.7	-0.48489	7.49e-09	2.17e-06	shisa family member 5 [Source:MGI Symbol;Acc:MGI:1915044]
Pglyrp1	ENSMUSG00000030413.6	2021.49	1969.96	1407.81	1794.72	3295.37	3570.22	3033.96	-0.797189	8.62e-09	2.44e-06	peptidoglycan recognition protein 1 [Source:MGI Symbol;Acc:MGI:1345092]
Ehd3	ENSMUSG00000024065.7	1500.77	1498.37	1752.09	1610.7	2476.04	2117.5	2527.37	-0.558519	1.06e-08	2.94e-06	EH-domain containing 3 [Source:MGI Symbol;Acc:MGI:1928900]
Acss1	ENSMUSG00000027452.8	4002.05	3677.38	3562.44	3717.08	4880.72	4991.9	5447.21	-0.441862	1.14e-08	3.08e-06	acyl-CoA synthetase short-chain family member 1 [Source:MGI Symbol;Acc:MGI:1915988]
Per2	ENSMUSG00000055866.9	1899.75	1586.85	2035.98	2022.28	925.919	1236.46	1036.37	0.747764	1.36e-08	3.61e-06	period circadian clock 2 [Source:MGI Symbol;Acc:MGI:1195265]
Cpeb3	ENSMUSG00000039652.13	410.231	383.101	433.255	401.686	247.514	224.265	199.48	0.777211	1.41e-08	3.64e-06	cytoplasmic polyadenylation element binding protein 3 [Source:MGI Symbol;Acc:MGI:2443075]
Plk1	ENSMUSG00000030867.6	90.0257	124.459	168.429	134.555	464.314	284.336	425.867	-1.18287	1.68e-08	4.27e-06	polo-like kinase 1 [Source:MGI Symbol;Acc:MGI:97621]
Klf11	ENSMUSG00000020653.8	2015.35	1657.84	2172.63	2379.44	1018.06	866.023	1265.54	0.851581	2.15e-08	5.34e-06	Kruppel-like factor 11 [Source:MGI Symbol;Acc:MGI:2653368]
Ccne1	ENSMUSG00000002068.13	403.07	370.461	355.926	356.175	632.335	566.669	607.719	-0.656953	2.21e-08	5.4e-06	cyclin E1 [Source:MGI Symbol;Acc:MGI:88316]
Cd27	ENSMUSG00000030336.11	1140.67	1129.86	904.645	1107.11	1681.11	1782.11	2238.82	-0.756832	2.49e-08	5.95e-06	CD27 antigen [Source:MGI Symbol;Acc:MGI:88326]
Ms4a3	ENSMUSG00000024681.8	0	0	2.11861	0	252.031	40.0473	176.285	-1.16648	2.53e-08	NA	membrane-spanning 4-domains, subfamily A, member 3 [Source:MGI Symbol;Acc:MGI:2158468]
Ccr2	ENSMUSG00000049103.10	13051.7	9709.76	9847.28	11150.2	17286.2	16813.9	18255.7	-0.636303	2.59e-08	6.06e-06	chemokine (C-C motif) receptor 2 [Source:MGI Symbol;Acc:MGI:106185]
Kif18b	ENSMUSG00000051378.10	42.9668	33.0595	51.9059	56.3943	268.291	111.131	290.406	-1.2938	3.78e-08	8.68e-06	kinesin family member 18B [Source:MGI Symbol;Acc:MGI:2446979]
Katnal1	ENSMUSG00000041298.12	1108.95	994.701	968.203	830.085	608.848	513.607	561.328	0.724284	4.34e-08	9.8e-06	katanin p60 subunit A-like 1 [Source:MGI Symbol;Acc:MGI:2387638]
Cdk18	ENSMUSG00000026437.8	1213.3	1190.14	993.626	1146.68	743.445	711.841	649.471	0.644309	5.08e-08	1.13e-05	cyclin-dependent kinase 18 [Source:MGI Symbol;Acc:MGI:97518]
Birc5	ENSMUSG00000017716.12	89.0027	103.068	173.726	120.704	439.021	268.317	519.577	-1.20019	5.94e-08	1.28e-05	baculoviral IAP repeat-containing 5 [Source:MGI Symbol;Acc:MGI:1203517]
Uhrf1	ENSMUSG00000001228.11	702.814	733.142	883.459	631.221	1324.29	1126.33	1437.19	-0.744628	5.98e-08	1.28e-05	ubiquitin-like, containing PHD and RING finger domains, 1 [Source:MGI Symbol;Acc:MGI:1338889]
Acot7	ENSMUSG00000028937.11	6682.36	7487	6744.58	6252.84	9473.28	10675.6	9078.68	-0.505231	6.21e-08	1.31e-05	acyl-CoA thioesterase 7 [Source:MGI Symbol;Acc:MGI:1917275]
Egr2	ENSMUSG00000037868.12	1248.08	953.863	1682.17	1222.87	2296.28	2452.9	3045.09	-0.887008	8.43e-08	1.74e-05	early growth response 2 [Source:MGI Symbol;Acc:MGI:95296]
Ugt1a7c	ENSMUSG00000090124.4	174.936	229.472	281.775	447.197	914.175	844.998	820.189	-1.14978	8.79e-08	1.79e-05	UDP glucuronosyltransferase 1 family, polypeptide A7C [Source:MGI Symbol;Acc:MGI:3032636]
S100a6	ENSMUSG00000001025.5	2721.23	2960.77	2395.08	2499.16	4418.21	4119.87	3676.93	-0.591953	9.04e-08	1.81e-05	S100 calcium binding protein A6 (calcyclin) [Source:MGI Symbol;Acc:MGI:1339467]
Tk1	ENSMUSG00000025574.10	199.489	209.053	248.936	213.705	407.404	368.435	513.082	-0.857023	9.6e-08	1.89e-05	thymidine kinase 1 [Source:MGI Symbol;Acc:MGI:98763]
Fcrl6	ENSMUSG00000070504.6	549.362	673.83	563.549	731.148	1156.27	1291.53	999.257	-0.780745	1e-07	1.94e-05	Fc receptor-like 6 [Source:MGI Symbol;Acc:MGI:3618339]
Shcbp1	ENSMUSG00000022322.7	85.9336	63.2019	113.345	66.2881	229.447	207.245	313.602	-1.14615	1.08e-07	2.05e-05	Shc SH2-domain binding protein 1 [Source:MGI Symbol;Acc:MGI:1338802]
Thy1	ENSMUSG00000032011.4	302.814	313.093	340.036	355.185	626.011	593.701	1030.8	-0.978102	1.14e-07	2.13e-05	thymus cell antigen 1, theta [Source:MGI Symbol;Acc:MGI:98747]
Rrm2	ENSMUSG00000020649.8	462.405	562.983	774.351	822.17	1430.88	1268.5	1788.83	-0.976702	1.22e-07	2.26e-05	ribonucleotide reductase M2 [Source:MGI Symbol;Acc:MGI:98181]
Kif22	ENSMUSG00000030677.7	203.581	274.199	300.842	258.227	537.484	456.539	680.089	-0.930443	1.26e-07	2.29e-05	kinesin family member 22 [Source:MGI Symbol;Acc:MGI:109233]
Bambi	ENSMUSG00000024232.1	4450.14	3730.86	4142.93	2933.49	1745.24	2310.73	2172.02	0.776064	1.68e-07	3e-05	BMP and activin membrane-bound inhibitor [Source:MGI Symbol;Acc:MGI:1915260]
Egr3	ENSMUSG00000033730.3	84.9106	55.4232	72.0326	104.874	253.837	185.219	300.612	-1.14177	1.79e-07	3.17e-05	early growth response 3 [Source:MGI Symbol;Acc:MGI:1306780]
Ubqln4	ENSMUSG00000008604.8	6146.3	5719.29	6050.74	5700.77	7196.87	7411.76	7139.54	-0.297483	2.74e-07	4.76e-05	ubiquilin 4 [Source:MGI Symbol;Acc:MGI:2150152]
Galnt10	ENSMUSG00000020520.11	7787.23	7806.9	6536.96	7077.98	5390.2	5038.95	5123.4	0.470453	2.84e-07	4.87e-05	UDP-N-acetyl-alpha-D-galactosamine:polypeptide N-acetylgalactosaminyltransferase 10 [Source:MGI Symbol;Acc:MGI:1890480]
Jak3	ENSMUSG00000031805.14	15085.4	14213.6	13316.5	13003.3	17454.2	18914.3	19257.7	-0.407818	3.48e-07	5.89e-05	Janus kinase 3 [Source:MGI Symbol;Acc:MGI:99928]
Btbd6	ENSMUSG00000002803.10	604.605	622.296	581.557	585.71	836.488	964.139	845.24	-0.535119	3.64e-07	6.08e-05	BTB (POZ) domain containing 6 [Source:MGI Symbol;Acc:MGI:3026623]
2810417H13Rik	ENSMUSG00000040204.6	86.9567	145.851	240.462	129.608	511.288	385.455	578.029	-1.13295	4.93e-07	8.11e-05	RIKEN cDNA 2810417H13 gene [Source:MGI Symbol;Acc:MGI:1915276]
Cks1b	ENSMUSG00000028044.6	126.854	203.218	235.165	191.939	560.068	352.416	552.05	-1.03183	5.42e-07	8.8e-05	CDC28 protein kinase 1b [Source:MGI Symbol;Acc:MGI:1889208]
Rab27b	ENSMUSG00000024511.12	9038.38	6808.31	6808.14	7195.72	4635.92	5079	4102.8	0.637017	5.61e-07	8.95e-05	RAB27B, member RAS oncogene family [Source:MGI Symbol;Acc:MGI:1931295]
Cx3cr1	ENSMUSG00000052336.6	2010.23	2312.22	1620.73	1962.92	3693.74	3501.14	2892	-0.697901	5.65e-07	8.95e-05	chemokine (C-X3-C motif) receptor 1 [Source:MGI Symbol;Acc:MGI:1333815]
Nt5e	ENSMUSG00000032420.7	728.39	667.996	640.878	604.508	1321.58	1110.31	950.083	-0.70205	6.18e-07	9.66e-05	5' nucleotidase, ecto [Source:MGI Symbol;Acc:MGI:99782]
Nusap1	ENSMUSG00000027306.12	249.617	227.527	412.069	368.047	803.968	601.711	1145.85	-1.0513	6.86e-07	0.000105742	nucleolar and spindle associated protein 1 [Source:MGI Symbol;Acc:MGI:2675669]
Gnpda1	ENSMUSG00000052102.11	1951.92	1985.51	2110.13	2157.83	2566.38	2546.01	2776.95	-0.355753	7.17e-07	0.000109141	glucosamine-6-phosphate deaminase 1 [Source:MGI Symbol;Acc:MGI:1347054]
Gm13394	ENSMUSG00000083773.4	2702.82	3095.92	2933.21	3043.32	3728.06	3715.39	3876.41	-0.355288	7.36e-07	0.000110677	predicted gene 13394 [Source:MGI Symbol;Acc:MGI:3651848]
Cdc20	ENSMUSG00000006398.12	594.374	642.715	676.895	715.318	1175.24	890.052	1227.5	-0.677477	7.6e-07	0.000112279	cell division cycle 20 [Source:MGI Symbol;Acc:MGI:1859866]
Urb2	ENSMUSG00000031976.11	1824.04	1687.01	1721.37	1635.44	1278.22	1314.55	1313.79	0.382612	7.65e-07	0.000112279	URB2 ribosome biogenesis 2 homolog (S. cerevisiae) [Source:MGI Symbol;Acc:MGI:2681124]
Esm1	ENSMUSG00000042379.8	499.234	690.359	1289.17	675.743	216.8	252.298	315.457	1.07834	9.12e-07	0.000132267	endothelial cell-specific molecule 1 [Source:MGI Symbol;Acc:MGI:1918940]
Lta4h	ENSMUSG00000015889.7	5433.26	5602.61	5342.07	5254.57	6474.2	6527.71	6464.09	-0.264827	9.79e-07	0.000140385	leukotriene A4 hydrolase [Source:MGI Symbol;Acc:MGI:96836]
Ppap2c	ENSMUSG00000052151.8	694.63	695.221	633.463	619.348	1129.17	1237.46	904.62	-0.663389	1.03e-06	0.000146202	phosphatidic acid phosphatase type 2C [Source:MGI Symbol;Acc:MGI:1354945]
Pgd	ENSMUSG00000028961.12	6317.15	6151.01	6063.45	6007.48	7448.9	7694.09	7223.04	-0.282595	1.12e-06	0.000157044	phosphogluconate dehydrogenase [Source:MGI Symbol;Acc:MGI:97553]
Zmiz1	ENSMUSG00000007817.11	22445	19431.2	19365.1	20597.8	15853.5	15072.8	13566.5	0.44104	1.22e-06	0.000169183	zinc finger, MIZ-type containing 1 [Source:MGI Symbol;Acc:MGI:3040693]
Cecr6	ENSMUSG00000094626.1	491.049	305.314	316.732	378.93	719.055	784.927	713.49	-0.834895	1.43e-06	0.000196227	cat eye syndrome chromosome region, candidate 6 [Source:MGI Symbol;Acc:MGI:2136977]
Aurka	ENSMUSG00000027496.12	265.985	305.314	328.384	309.674	485.091	443.524	520.505	-0.626433	1.6e-06	0.00021664	aurora kinase A [Source:MGI Symbol;Acc:MGI:894678]
Slco4a1	ENSMUSG00000038963.12	228.133	191.55	222.454	195.896	384.821	319.377	400.816	-0.725811	1.79e-06	0.000239916	solute carrier organic anion transporter family, member 4a1 [Source:MGI Symbol;Acc:MGI:1351866]
Mcm6	ENSMUSG00000026355.8	7516.12	8006.23	7485.04	8101.99	9277.25	9699.46	9558.36	-0.290885	1.82e-06	0.000240684	minichromosome maintenance deficient 6 (MIS5 homolog, S. pombe) (S. cerevisiae) [Source:MGI Symbol;Acc:MGI:1298227]
Smim3	ENSMUSG00000038059.6	713.045	749.672	938.543	776.659	1130.07	1286.52	1182.96	-0.56232	1.95e-06	0.000255785	small integral membrane protein 3 [Source:MGI Symbol;Acc:MGI:1917088]
Cdkn2c	ENSMUSG00000028551.11	991.306	928.582	909.941	884.501	1357.71	1196.41	1290.59	-0.450869	2.11e-06	0.000273722	cyclin-dependent kinase inhibitor 2C (p18, inhibits CDK4) [Source:MGI Symbol;Acc:MGI:105388]
Parp10	ENSMUSG00000063268.9	6121.75	5954.59	5633.37	5716.6	4745.22	4696.55	4760.62	0.296315	2.29e-06	0.000293337	poly (ADP-ribose) polymerase family, member 10 [Source:MGI Symbol;Acc:MGI:3712326]
Cenpa	ENSMUSG00000029177.6	1743.23	1681.17	1748.91	1536.5	2212.27	2579.05	3323.44	-0.633133	2.45e-06	0.000310347	centromere protein A [Source:MGI Symbol;Acc:MGI:88375]
Cdc45	ENSMUSG00000000028.11	462.405	410.326	424.781	347.27	635.045	633.749	716.274	-0.63116	2.66e-06	0.000333661	cell division cycle 45 [Source:MGI Symbol;Acc:MGI:1338073]
Sox9	ENSMUSG00000000567.5	6.13812	9.72337	36.0163	19.7875	102.98	120.142	161.44	-1.08679	2.74e-06	NA	SRY (sex determining region Y)-box 9 [Source:MGI Symbol;Acc:MGI:98371]
Arhgap11a	ENSMUSG00000041219.11	293.607	327.678	380.29	384.867	607.945	521.616	572.462	-0.649423	3.4e-06	0.000418642	Rho GTPase activating protein 11A [Source:MGI Symbol;Acc:MGI:2444300]
Dhrs3	ENSMUSG00000066026.11	4746.81	4320.09	4439.54	3964.42	3242.97	3416.04	3112.82	0.402951	3.4e-06	0.000418642	dehydrogenase/reductase (SDR family) member 3 [Source:MGI Symbol;Acc:MGI:1315215]
Bcl3	ENSMUSG00000053175.13	2287.47	2455.15	2719.23	2446.72	3148.12	3109.67	3135.09	-0.336382	3.89e-06	0.000474187	B cell leukemia/lymphoma 3 [Source:MGI Symbol;Acc:MGI:88140]
Fcer1a	ENSMUSG00000005339.7	28.6445	21.3914	14.8302	17.8087	252.934	92.1088	63.0915	-1.07276	4.07e-06	NA	Fc receptor, IgE, high affinity I, alpha polypeptide [Source:MGI Symbol;Acc:MGI:95494]
Itgad	ENSMUSG00000070369.10	165.729	137.1	115.464	140.491	258.354	265.313	359.065	-0.867706	4.07e-06	0.000491317	integrin, alpha D [Source:MGI Symbol;Acc:MGI:3578624]
Hmga2	ENSMUSG00000056758.11	2.04604	5.83402	13.7709	5.93625	71.3635	81.0958	39.8961	-1.03391	4.44e-06	NA	high mobility group AT-hook 2 [Source:MGI Symbol;Acc:MGI:101761]
Ltb	ENSMUSG00000024399.5	4856.27	4607.91	3960.73	4436.35	5787.67	6058.16	6328.63	-0.426645	4.52e-06	0.000540337	lymphotoxin B [Source:MGI Symbol;Acc:MGI:104796]
Mcm10	ENSMUSG00000026669.11	63.4272	65.1466	139.828	81.1287	206.864	325.384	266.283	-1.04229	4.66e-06	0.000551637	minichromosome maintenance deficient 10 (S. cerevisiae) [Source:MGI Symbol;Acc:MGI:1917274]
Ccnb2	ENSMUSG00000032218.6	58.3121	105.012	201.268	184.024	580.845	331.392	732.974	-1.08144	4.91e-06	0.000575054	cyclin B2 [Source:MGI Symbol;Acc:MGI:88311]
Aurkb	ENSMUSG00000020897.9	107.417	119.597	272.241	153.353	523.934	371.439	569.679	-1.03472	5.12e-06	0.000593995	aurora kinase B [Source:MGI Symbol;Acc:MGI:107168]
Arid5a	ENSMUSG00000037447.13	13797.5	11917	11756.1	11207.6	8552.78	9345.04	9063.83	0.415618	5.46e-06	0.000628074	AT rich interactive domain 5A (MRF1-like) [Source:MGI Symbol;Acc:MGI:2443039]
Lgals3	ENSMUSG00000050335.13	3259.34	3513.05	4580.43	3586.48	5451.63	5119.05	6178.32	-0.546874	5.53e-06	0.000630085	lectin, galactose binding, soluble 3 [Source:MGI Symbol;Acc:MGI:96778]
Cd200r3	ENSMUSG00000036172.14	32.7366	31.1148	14.8302	47.49	273.711	126.149	101.132	-1.07161	5.64e-06	0.000636283	CD200 receptor 3 [Source:MGI Symbol;Acc:MGI:1921853]
Ankle1	ENSMUSG00000046295.10	16.3683	23.3361	23.3047	20.7769	84.9135	54.0639	166.079	-1.07501	5.74e-06	NA	ankyrin repeat and LEM domain containing 1 [Source:MGI Symbol;Acc:MGI:1918775]
Bub1	ENSMUSG00000027379.10	49.1049	95.2891	138.769	62.3306	346.881	204.241	371.126	-1.06244	5.98e-06	0.000668969	budding uninhibited by benzimidazoles 1 homolog (S. cerevisiae) [Source:MGI Symbol;Acc:MGI:1100510]
Oplah	ENSMUSG00000022562.10	2168.8	1948.56	1879.2	1643.35	1349.58	1282.52	1296.16	0.507128	6.28e-06	0.000695724	5-oxoprolinase (ATP-hydrolysing) [Source:MGI Symbol;Acc:MGI:1922725]
Ctsg	ENSMUSG00000040314.1	0	0	8.47442	1.97875	323.394	62.0733	280.2	-0.881744	6.61e-06	0.000721649	cathepsin G [Source:MGI Symbol;Acc:MGI:88563]
Smarcb1	ENSMUSG00000000902.10	3989.78	4203.41	4180.01	4075.23	4747.03	5251.2	4963.81	-0.279219	6.63e-06	0.000721649	SWI/SNF related, matrix associated, actin dependent regulator of chromatin, subfamily b, member 1 [Source:MGI Symbol;Acc:MGI:1328366]
Ptpn6	ENSMUSG00000004266.12	17258.3	17133.6	15097.2	15909.1	20740.6	22825	20410.1	-0.376017	6.84e-06	0.000737213	protein tyrosine phosphatase, non-receptor type 6 [Source:MGI Symbol;Acc:MGI:96055]
Pdlim7	ENSMUSG00000021493.12	2607.68	2596.14	3011.6	2758.38	3312.53	3932.65	3681.57	-0.400159	7.08e-06	0.000756275	PDZ and LIM domain 7 [Source:MGI Symbol;Acc:MGI:1914649]
Ramp1	ENSMUSG00000034353.11	633.249	733.142	792.359	699.488	1118.33	945.117	1303.58	-0.600255	7.63e-06	0.000808137	receptor (calcitonin) activity modifying protein 1 [Source:MGI Symbol;Acc:MGI:1858418]
Itm2c	ENSMUSG00000026223.12	10790.8	11841.1	12069.7	10951.4	13557.3	14226.8	13610.1	-0.275283	7.89e-06	0.000829055	integral membrane protein 2C [Source:MGI Symbol;Acc:MGI:1927594]
Ifitm1	ENSMUSG00000025491.11	36.8287	46.6722	155.718	65.2987	450.764	186.22	690.295	-1.04227	8.2e-06	0.000853923	interferon induced transmembrane protein 1 [Source:MGI Symbol;Acc:MGI:1915963]
Neil3	ENSMUSG00000039396.7	36.8287	21.3914	57.2024	41.5537	165.31	92.1088	218.964	-1.05542	8.55e-06	0.000879208	nei like 3 (E. coli) [Source:MGI Symbol;Acc:MGI:2384588]
Trp53inp2	ENSMUSG00000038375.12	6027.63	4885.02	7146.06	4931.04	3556.43	3525.16	3930.23	0.585805	8.59e-06	0.000879208	transformation related protein 53 inducible nuclear protein 2 [Source:MGI Symbol;Acc:MGI:1915978]
Kbtbd7	ENSMUSG00000043881.8	1202.05	898.44	1203.37	1137.78	711.828	706.835	758.953	0.560301	9.08e-06	0.000921781	kelch repeat and BTB (POZ) domain containing 7 [Source:MGI Symbol;Acc:MGI:2685141]
Klrb1	ENSMUSG00000079299.2	33.7596	48.6169	58.2617	65.2987	139.114	139.164	126.183	-0.969866	9.38e-06	0.000944633	killer cell lectin-like receptor subfamily B member 1 [Source:MGI Symbol;Acc:MGI:96877]
Bcl2a1d	ENSMUSG00000099974.1	291.561	377.267	455.5	434.335	671.178	628.743	785.86	-0.725933	9.78e-06	0.000977223	NA
Glt28d2	ENSMUSG00000031286.6	24.5525	51.5339	88.9815	85.0862	9.03335	6.0071	5.56689	1.01531	1.07e-05	NA	glycosyltransferase 28 domain containing 2 [Source:MGI Symbol;Acc:MGI:2443773]
Serpinb9b	ENSMUSG00000021403.2	44401.1	40601.9	37738.7	43919.3	60399.7	64228.9	50620.7	-0.46716	1.08e-05	0.00107353	serine (or cysteine) peptidase inhibitor, clade B, member 9b [Source:MGI Symbol;Acc:MGI:894668]
Pqlc3	ENSMUSG00000045679.10	4698.73	4437.75	4283.82	5226.86	6040.6	6504.68	6057.71	-0.400656	1.28e-05	0.00125333	PQ loop repeat containing [Source:MGI Symbol;Acc:MGI:2444067]
Sell	ENSMUSG00000026581.11	51130.5	45742.6	44065.9	49598.3	64486.4	62786.2	57819.6	-0.366369	1.29e-05	0.00125955	selectin, lymphocyte [Source:MGI Symbol;Acc:MGI:98279]
Cit	ENSMUSG00000029516.16	288.492	181.827	281.775	240.418	411.921	477.564	531.638	-0.779285	1.3e-05	0.00126202	citron [Source:MGI Symbol;Acc:MGI:105313]
Tnip1	ENSMUSG00000020400.14	4014.33	4138.27	4211.79	4413.6	4851.81	5450.44	5831.32	-0.35295	1.34e-05	0.00128258	TNFAIP3 interacting protein 1 [Source:MGI Symbol;Acc:MGI:1926194]
Kif11	ENSMUSG00000012443.3	220.972	238.223	376.053	319.568	750.672	467.552	645.76	-0.864446	1.35e-05	0.00128258	kinesin family member 11 [Source:MGI Symbol;Acc:MGI:1098231]
Cd300lf	ENSMUSG00000047798.12	445.014	540.62	591.091	726.201	981.022	935.105	1460.38	-0.794783	1.52e-05	0.00142538	CD300 antigen like family member F [Source:MGI Symbol;Acc:MGI:2442359]
Srcin1	ENSMUSG00000038453.12	734.528	679.664	517.999	701.466	416.438	358.423	284.839	0.750532	1.52e-05	0.00142538	SRC kinase signaling inhibitor 1 [Source:MGI Symbol;Acc:MGI:1933179]
Pkm	ENSMUSG00000032294.13	34699.8	35118.9	33660.4	33269.7	38716	41301.8	40121.5	-0.230731	1.56e-05	0.00145452	pyruvate kinase, muscle [Source:MGI Symbol;Acc:MGI:97591]
Map4k1	ENSMUSG00000037337.10	3648.09	3712.38	2920.5	3547.9	4765.09	4605.44	5137.31	-0.461885	1.63e-05	0.00150594	mitogen-activated protein kinase kinase kinase kinase 1 [Source:MGI Symbol;Acc:MGI:1346882]
E2f1	ENSMUSG00000027490.14	277.238	294.618	362.282	216.673	569.101	453.536	635.554	-0.781459	1.67e-05	0.00152994	E2F transcription factor 1 [Source:MGI Symbol;Acc:MGI:101941]
Gpa33	ENSMUSG00000000544.11	4.09208	0	4.23721	7.91499	81.3002	60.071	36.1848	-0.908158	1.67e-05	NA	glycoprotein A33 (transmembrane) [Source:MGI Symbol;Acc:MGI:1891703]
Lax1	ENSMUSG00000051998.11	14732.5	14735.8	12022	15175	21030.5	20769.5	17957.9	-0.46897	1.72e-05	0.00156425	lymphocyte transmembrane adaptor 1 [Source:MGI Symbol;Acc:MGI:2443362]
Mmp8	ENSMUSG00000005800.2	22.5064	25.2808	139.828	69.2562	583.555	160.189	877.713	-0.954043	1.76e-05	0.0015782	matrix metallopeptidase 8 [Source:MGI Symbol;Acc:MGI:1202395]
Asf1b	ENSMUSG00000005470.8	894.119	1078.32	957.61	809.308	1384.81	1387.64	1298.01	-0.507344	1.77e-05	0.0015782	anti-silencing function 1B histone chaperone [Source:MGI Symbol;Acc:MGI:1914179]
Msh5	ENSMUSG00000007035.12	169.821	155.574	139.828	175.119	270.097	258.305	329.375	-0.718719	1.77e-05	0.0015782	mutS homolog 5 (E. coli) [Source:MGI Symbol;Acc:MGI:1329021]
P2ry10	ENSMUSG00000050921.9	9003.6	7898.3	7316.61	8792.57	5457.95	6225.35	6259.97	0.437722	1.8e-05	0.00158015	purinergic receptor P2Y, G-protein coupled 10 [Source:MGI Symbol;Acc:MGI:1926076]
Smoc2	ENSMUSG00000023886.9	2903.33	2530.99	2173.69	2956.25	3751.55	4175.93	3828.17	-0.531332	1.8e-05	0.00158015	SPARC related modular calcium binding 2 [Source:MGI Symbol;Acc:MGI:1929881]
Dut	ENSMUSG00000027203.12	302.814	421.994	423.721	352.217	655.821	546.646	697.717	-0.668047	1.96e-05	0.00170332	deoxyuridine triphosphatase [Source:MGI Symbol;Acc:MGI:1346051]
Sesn1	ENSMUSG00000038332.9	6482.88	6717.88	6372.77	7239.25	4799.42	5293.25	5545.55	0.346879	2.1e-05	0.00181065	sestrin 1 [Source:MGI Symbol;Acc:MGI:2155278]
Zfp36l2	ENSMUSG00000045817.8	232789	174957	151477	203058	104856	135664	112179	0.619724	2.11e-05	0.00181065	zinc finger protein 36, C3H type-like 2 [Source:MGI Symbol;Acc:MGI:107945]
Dus2	ENSMUSG00000031901.9	658.825	785.649	822.019	886.479	1149.04	1146.35	1114.31	-0.499446	2.15e-05	0.00183454	dihydrouridine synthase 2 [Source:MGI Symbol;Acc:MGI:1913619]
Ifng	ENSMUSG00000055170.3	20123.8	15685.7	15626.8	15754.8	22219.3	29872.3	24052.7	-0.551134	2.38e-05	0.00201259	interferon gamma [Source:MGI Symbol;Acc:MGI:107656]
Alox12	ENSMUSG00000000320.7	224.041	148.768	472.449	165.225	63.2335	67.0792	70.514	0.996279	2.51e-05	0.00211127	arachidonate 12-lipoxygenase [Source:MGI Symbol;Acc:MGI:87998]
Spc24	ENSMUSG00000074476.5	47.0589	55.4232	110.168	67.2774	196.927	163.193	223.604	-0.957892	2.56e-05	0.00213418	SPC24, NDC80 kinetochore complex component, homolog (S. cerevisiae) [Source:MGI Symbol;Acc:MGI:1914879]
Tpx2	ENSMUSG00000027469.13	132.993	189.606	371.815	248.333	616.075	505.597	738.541	-0.940425	2.67e-05	0.00221046	TPX2, microtubule-associated protein homolog (Xenopus laevis) [Source:MGI Symbol;Acc:MGI:1919369]
Ppbp	ENSMUSG00000029372.6	223.018	93.3444	552.956	176.109	41.5534	40.0473	51.9577	0.981955	2.87e-05	0.00235636	pro-platelet basic protein [Source:MGI Symbol;Acc:MGI:1888712]
Rhou	ENSMUSG00000039960.5	8.18416	15.5574	57.2024	5.93625	192.41	146.173	244.015	-0.91516	2.89e-05	0.00235636	ras homolog gene family, member U [Source:MGI Symbol;Acc:MGI:1916831]
Kcnk7	ENSMUSG00000024936.7	287.469	313.093	266.944	280.982	551.034	471.557	401.744	-0.644204	2.9e-05	0.00235636	potassium channel, subfamily K, member 7 [Source:MGI Symbol;Acc:MGI:1341841]
Socs1	ENSMUSG00000038037.4	3143.74	3287.47	2629.19	3243.17	2265.56	2264.68	2145.11	0.438596	2.96e-05	0.002388	suppressor of cytokine signaling 1 [Source:MGI Symbol;Acc:MGI:1354910]
Chek1	ENSMUSG00000032113.12	125.831	107.929	171.607	134.555	259.257	228.27	295.973	-0.775346	3.6e-05	0.00286978	checkpoint kinase 1 [Source:MGI Symbol;Acc:MGI:1202065]
Spin2c	ENSMUSG00000046550.8	354.988	375.322	294.486	315.61	573.618	604.714	470.402	-0.633689	3.6e-05	0.00286978	spindlin family, member 2C [Source:MGI Symbol;Acc:MGI:3605548]
Pole	ENSMUSG00000007080.11	575.96	513.394	552.956	438.293	836.488	744.88	750.603	-0.538083	3.66e-05	0.00289047	polymerase (DNA directed), epsilon [Source:MGI Symbol;Acc:MGI:1196391]
Mcm3	ENSMUSG00000041859.10	2811.26	3080.36	2817.75	2895.9	3436.29	3918.63	3610.13	-0.328698	3.68e-05	0.00289047	minichromosome maintenance deficient 3 (S. cerevisiae) [Source:MGI Symbol;Acc:MGI:101845]
Inf2	ENSMUSG00000037679.8	258.824	254.752	255.292	202.822	384.821	382.452	374.837	-0.588371	3.9e-05	0.00304887	inverted formin, FH2 and WH2 domain containing [Source:MGI Symbol;Acc:MGI:1917685]
Gcnt1	ENSMUSG00000038843.14	937.086	710.779	710.792	858.777	1242.09	1141.35	1247.91	-0.543866	3.94e-05	0.00305544	glucosaminyl (N-acetyl) transferase 1, core 2 [Source:MGI Symbol;Acc:MGI:95676]
Capg	ENSMUSG00000056737.11	2097.19	2505.71	2988.29	2683.18	3692.83	3366.98	4206.72	-0.513268	4.18e-05	0.00322458	capping protein (actin filament), gelsolin-like [Source:MGI Symbol;Acc:MGI:1098259]
Zfp672	ENSMUSG00000049755.11	3215.35	2817.83	2669.44	2937.45	2263.76	2209.61	2130.26	0.381673	4.24e-05	0.00324004	zinc finger protein 672 [Source:MGI Symbol;Acc:MGI:2442105]
Nek2	ENSMUSG00000026622.12	14.3223	28.1978	56.1431	70.2456	269.194	99.1171	344.22	-0.944612	4.25e-05	0.00324004	NIMA (never in mitosis gene a)-related expressed kinase 2 [Source:MGI Symbol;Acc:MGI:109359]
Cdc6	ENSMUSG00000017499.12	45.0129	143.906	152.54	75.1924	308.037	293.347	447.207	-0.964809	4.44e-05	0.00335945	cell division cycle 6 [Source:MGI Symbol;Acc:MGI:1345150]
Ncapd2	ENSMUSG00000038252.10	835.807	878.021	1032.82	783.584	1214.08	1284.52	1797.18	-0.621654	4.72e-05	0.00354664	non-SMC condensin I complex, subunit D2 [Source:MGI Symbol;Acc:MGI:1915548]
Pafah2	ENSMUSG00000037366.11	1012.79	1178.47	1110.15	1182.3	1370.36	1711.02	1593.06	-0.452458	4.75e-05	0.00354664	platelet-activating factor acetylhydrolase 2 [Source:MGI Symbol;Acc:MGI:2140321]
Ccnf	ENSMUSG00000072082.6	190.282	170.159	167.37	170.172	304.424	266.315	269.067	-0.610499	4.77e-05	0.00354664	cyclin F [Source:MGI Symbol;Acc:MGI:102551]
Ifitm6	ENSMUSG00000059108.3	8.18416	17.5021	22.2454	49.4687	242.094	44.052	543.7	-0.855059	4.84e-05	0.00357772	interferon induced transmembrane protein 6 [Source:MGI Symbol;Acc:MGI:2686976]
Cdca8	ENSMUSG00000028873.13	172.89	187.661	275.419	124.661	489.608	328.388	521.432	-0.878281	4.9e-05	0.00359733	cell division cycle associated 8 [Source:MGI Symbol;Acc:MGI:1196274]
Cyp1a1	ENSMUSG00000032315.5	167.775	212.942	1180.06	489.74	97.5602	51.0603	35.257	0.921316	5.12e-05	0.00373809	cytochrome P450, family 1, subfamily a, polypeptide 1 [Source:MGI Symbol;Acc:MGI:88588]
Mcm7	ENSMUSG00000029730.13	4109.47	4217.03	3818.79	4025.76	4900.59	4804.68	4901.65	-0.267999	5.28e-05	0.00382717	minichromosome maintenance deficient 7 (S. cerevisiae) [Source:MGI Symbol;Acc:MGI:1298398]
St3gal3	ENSMUSG00000028538.9	331.458	410.326	557.193	420.484	641.368	765.905	898.125	-0.708529	5.33e-05	0.00384586	ST3 beta-galactoside alpha-2,3-sialyltransferase 3 [Source:MGI Symbol;Acc:MGI:1316659]
Spag5	ENSMUSG00000002055.6	147.315	157.519	133.472	150.385	283.647	223.264	420.3	-0.817492	5.53e-05	0.00396442	sperm associated antigen 5 [Source:MGI Symbol;Acc:MGI:1927470]
Fam20c	ENSMUSG00000025854.12	152.43	215.859	281.775	216.673	327.007	505.597	659.677	-0.863102	5.76e-05	0.00410389	family with sequence similarity 20, member C [Source:MGI Symbol;Acc:MGI:2136853]
Ctsa	ENSMUSG00000017760.12	14440.9	15362	14689.4	16403.8	17637.6	18795.2	18860.6	-0.275278	5.89e-05	0.00417566	cathepsin A [Source:MGI Symbol;Acc:MGI:97748]
Aspm	ENSMUSG00000033952.11	45.0129	27.2254	114.405	59.3625	215.897	190.225	266.283	-0.951272	6.11e-05	0.00430431	asp (abnormal spindle)-like, microcephaly associated (Drosophila) [Source:MGI Symbol;Acc:MGI:1334448]
Rabgap1l	ENSMUSG00000026721.12	7212.29	6386.31	6138.66	7623.13	8499.48	9244.92	9615.88	-0.400055	6.42e-05	0.00449235	RAB GTPase activating protein 1-like [Source:MGI Symbol;Acc:MGI:1352507]
Cxcr4	ENSMUSG00000045382.6	8655.77	6526.33	6742.46	6883.08	2624.19	5134.07	4174.24	0.708207	6.56e-05	0.0045696	chemokine (C-X-C motif) receptor 4 [Source:MGI Symbol;Acc:MGI:109563]
4930539E08Rik	ENSMUSG00000048905.4	223.018	151.685	138.769	142.47	273.711	351.415	370.198	-0.791133	6.62e-05	0.00458622	RIKEN cDNA 4930539E08 gene [Source:MGI Symbol;Acc:MGI:1925441]
AW549877	ENSMUSG00000041935.9	4125.84	3578.2	4080.44	3866.47	3009.91	2902.43	3316.01	0.330555	6.68e-05	0.00459571	expressed sequence AW549877 [Source:MGI Symbol;Acc:MGI:2146232]
Cd226	ENSMUSG00000034028.12	4496.17	3727.94	3467.1	3789.3	2915.06	2807.32	2718.5	0.430251	6.73e-05	0.00460682	CD226 antigen [Source:MGI Symbol;Acc:MGI:3039602]
Mybl2	ENSMUSG00000017861.8	152.43	172.104	154.658	160.279	240.287	247.292	297.829	-0.625704	7.39e-05	0.00502943	myeloblastosis oncogene-like 2 [Source:MGI Symbol;Acc:MGI:101785]
Tsc22d3	ENSMUSG00000031431.10	73112.1	79242.6	66660.9	83901.9	44301.4	61913.1	49607.5	0.497869	7.53e-05	0.0050944	TSC22 domain family, member 3 [Source:MGI Symbol;Acc:MGI:1196284]
Ncf2	ENSMUSG00000026480.9	480.819	579.513	754.224	865.702	1413.72	940.111	1998.51	-0.827015	7.7e-05	0.00518381	neutrophil cytosolic factor 2 [Source:MGI Symbol;Acc:MGI:97284]
Rad54l	ENSMUSG00000028702.12	117.647	146.823	157.836	140.491	307.134	200.237	316.385	-0.766489	7.86e-05	0.00526118	RAD54 like (S. cerevisiae) [Source:MGI Symbol;Acc:MGI:894697]
Cd44	ENSMUSG00000005087.14	8793.88	7824.4	8175.7	7879.38	10074.9	9402.11	10588.2	-0.292834	7.98e-05	0.00531047	CD44 antigen [Source:MGI Symbol;Acc:MGI:88338]
Itih5	ENSMUSG00000025780.7	3044.51	2929.65	2151.44	3808.1	5072.23	5056.97	4575.99	-0.627581	8.11e-05	0.0053717	inter-alpha (globulin) inhibitor H5 [Source:MGI Symbol;Acc:MGI:1925751]
Gp49a	ENSMUSG00000089672.4	1093.61	524.09	1167.35	1026.97	1765.12	1661.96	2835.4	-0.830391	8.41e-05	0.00553699	glycoprotein 49 A [Source:MGI Symbol;Acc:MGI:102702]
Cipc	ENSMUSG00000034157.9	7524.31	6226.85	5780.62	6175.67	4750.64	4540.36	4880.31	0.416617	8.48e-05	0.00555576	CLOCK interacting protein, circadian [Source:MGI Symbol;Acc:MGI:1919185]
Cpa3	ENSMUSG00000001865.2	105.371	102.095	134.531	91.0224	390.241	167.198	254.221	-0.88285	8.53e-05	0.00555962	carboxypeptidase A3, mast cell [Source:MGI Symbol;Acc:MGI:88479]
Cenpe	ENSMUSG00000045328.8	124.808	165.297	224.572	249.322	392.951	375.444	401.744	-0.793144	8.61e-05	0.00558356	centromere protein E [Source:MGI Symbol;Acc:MGI:1098230]
Gjb2	ENSMUSG00000046352.7	230.179	171.131	272.241	253.28	364.044	535.633	409.167	-0.739794	8.98e-05	0.00576735	gap junction protein, beta 2 [Source:MGI Symbol;Acc:MGI:95720]
Zfhx3	ENSMUSG00000038872.9	1755.5	2016.63	2025.39	2001.5	1548.32	1576.86	1467.8	0.331247	8.99e-05	0.00576735	zinc finger homeobox 3 [Source:MGI Symbol;Acc:MGI:99948]
Lilrb4	ENSMUSG00000062593.12	702.814	467.694	1225.61	1158.56	2177.04	1484.75	2961.59	-0.878688	9.08e-05	0.0057953	leukocyte immunoglobulin-like receptor, subfamily B, member 4 [Source:MGI Symbol;Acc:MGI:102701]
Tob1	ENSMUSG00000037573.5	8850.14	8561.43	7940.54	8988.46	6740.69	7250.57	6832.43	0.293767	9.39e-05	0.00595958	transducer of ErbB-2.1 [Source:MGI Symbol;Acc:MGI:1349721]
Lpgat1	ENSMUSG00000026623.13	1819.95	1530.46	2031.74	1967.87	2564.57	2391.83	2526.44	-0.423122	9.44e-05	0.00596102	lysophosphatidylglycerol acyltransferase 1 [Source:MGI Symbol;Acc:MGI:2446186]
Casc5	ENSMUSG00000027326.10	275.192	210.025	284.953	267.131	368.561	428.506	518.649	-0.652746	9.83e-05	0.00617611	cancer susceptibility candidate 5 [Source:MGI Symbol;Acc:MGI:1923714]
Ube2c	ENSMUSG00000001403.10	49.1049	27.2254	156.777	81.1287	336.944	219.259	463.908	-0.910977	0.000105196	0.00657338	ubiquitin-conjugating enzyme E2C [Source:MGI Symbol;Acc:MGI:1915862]
Hs3st3b1	ENSMUSG00000070407.5	4118.68	3757.11	3539.13	3855.59	3187.87	2710.2	2833.55	0.369763	0.000106386	0.00661384	heparan sulfate (glucosamine) 3-O-sulfotransferase 3B1 [Source:MGI Symbol;Acc:MGI:1333853]
Klhl30	ENSMUSG00000026308.8	1687.98	1708.4	1139.81	1521.66	2254.72	2541	2262.94	-0.570219	0.000108776	0.00671623	kelch-like 30 [Source:MGI Symbol;Acc:MGI:1918038]
Smc2	ENSMUSG00000028312.16	2121.74	2118.72	2138.73	2030.2	2549.21	2675.16	2416.96	-0.276269	0.000109135	0.00671623	structural maintenance of chromosomes 2 [Source:MGI Symbol;Acc:MGI:106067]
Hist3h2a	ENSMUSG00000078851.4	834.784	678.691	761.639	742.031	579.941	480.568	505.659	0.484642	0.000112729	0.00690253	histone cluster 3, H2a [Source:MGI Symbol;Acc:MGI:2448458]
Tef	ENSMUSG00000022389.11	5436.33	6087.8	5577.23	6165.78	4850.91	4121.87	4629.8	0.341035	0.000114438	0.00697213	thyrotroph embryonic factor [Source:MGI Symbol;Acc:MGI:98663]
Rora	ENSMUSG00000032238.14	2946.3	2802.28	2456.52	2532.8	1797.64	2112.5	2045.83	0.408214	0.000116601	0.00706858	RAR-related orphan receptor alpha [Source:MGI Symbol;Acc:MGI:104661]
Tanc1	ENSMUSG00000035168.13	3318.68	3308.86	4113.27	3096.74	2654	2319.74	2608.09	0.420412	0.00012312	0.00742683	tetratricopeptide repeat, ankyrin repeat and coiled-coil containing 1 [Source:MGI Symbol;Acc:MGI:1914110]
Nfkb1	ENSMUSG00000028163.14	4727.37	4723.61	4839.96	4724.26	5239.34	5859.92	5632.77	-0.232268	0.00012789	0.00767654	nuclear factor of kappa light polypeptide gene enhancer in B cells 1, p105 [Source:MGI Symbol;Acc:MGI:97312]
Adrb2	ENSMUSG00000045730.3	6566.76	5427.59	6952.21	6070.8	4253.81	4565.39	5152.16	0.3981	0.000132764	0.00793003	adrenergic receptor, beta 2 [Source:MGI Symbol;Acc:MGI:87938]
Pick1	ENSMUSG00000068206.9	700.768	657.3	669.48	686.626	816.615	922.089	907.404	-0.367036	0.000137106	0.00814943	protein interacting with C kinase 1 [Source:MGI Symbol;Acc:MGI:894645]
Fam84b	ENSMUSG00000072568.4	2149.36	1785.21	2658.85	2152.88	1294.48	1568.85	1543.89	0.515748	0.000139426	0.00824713	family with sequence similarity 84, member B [Source:MGI Symbol;Acc:MGI:3026924]
Otub2	ENSMUSG00000021203.12	589.259	659.245	650.412	589.667	464.314	398.471	472.258	0.44577	0.000140846	0.00829089	OTU domain, ubiquitin aldehyde binding 2 [Source:MGI Symbol;Acc:MGI:1915399]
1190002N15Rik	ENSMUSG00000045414.7	6445.02	5822.36	7285.89	6770.29	5405.56	5116.04	4868.25	0.339266	0.000143977	0.00843441	RIKEN cDNA 1190002N15 gene [Source:MGI Symbol;Acc:MGI:1916111]
Slc25a13	ENSMUSG00000015112.12	65.4733	110.846	94.278	106.852	238.48	183.216	173.502	-0.794981	0.000146802	0.00854265	solute carrier family 25 (mitochondrial carrier, adenine nucleotide translocator), member 13 [Source:MGI Symbol;Acc:MGI:1354721]
Mcm5	ENSMUSG00000005410.5	5753.46	5810.69	5168.34	5080.44	6598.86	6928.18	6757.28	-0.305901	0.000147227	0.00854265	minichromosome maintenance deficient 5, cell division cycle 46 (S. cerevisiae) [Source:MGI Symbol;Acc:MGI:103197]
Rps6kc1	ENSMUSG00000089872.7	1436.32	1335.99	1289.17	1216.93	923.209	1061.25	982.557	0.390648	0.000150752	0.00870575	ribosomal protein S6 kinase polypeptide 1 [Source:MGI Symbol;Acc:MGI:2443419]
Cyp4f18	ENSMUSG00000003484.4	91.0487	99.1784	127.116	215.684	423.664	219.259	487.103	-0.883789	0.000158133	0.0090889	cytochrome P450, family 4, subfamily f, polypeptide 18 [Source:MGI Symbol;Acc:MGI:1919304]
Scg5	ENSMUSG00000023236.7	529.924	595.07	494.695	518.432	689.245	828.979	751.531	-0.468386	0.00015956	0.0091279	secretogranin V [Source:MGI Symbol;Acc:MGI:98289]
Ccna2	ENSMUSG00000027715.6	81.8416	158.491	379.23	224.588	877.138	422.499	790.499	-0.891652	0.000171338	0.00975584	cyclin A2 [Source:MGI Symbol;Acc:MGI:108069]
Cpt1a	ENSMUSG00000024900.4	7884.41	8613.94	7170.42	12397.8	6416.39	4422.22	4827.42	0.655728	0.000172201	0.0097594	carnitine palmitoyltransferase 1a, liver [Source:MGI Symbol;Acc:MGI:1098296]
Rab44	ENSMUSG00000064147.6	50.128	76.8146	199.149	127.629	559.164	165.195	715.346	-0.877865	0.000178491	0.010069	RAB44, member RAS oncogene family [Source:MGI Symbol;Acc:MGI:3045302]
Oaf	ENSMUSG00000032014.5	20.4604	19.4467	93.2187	23.745	177.054	126.149	323.808	-0.8506	0.000181547	0.010163	OAF homolog (Drosophila) [Source:MGI Symbol;Acc:MGI:94852]
Tmem63a	ENSMUSG00000026519.13	4819.45	4906.41	5067.71	5225.87	4336.91	4291.07	4351.45	0.201517	0.000181935	0.010163	transmembrane protein 63a [Source:MGI Symbol;Acc:MGI:2384789]
Clec4e	ENSMUSG00000030142.7	181.074	203.218	440.67	373.983	563.681	626.74	1287.81	-0.873371	0.000182658	0.010163	C-type lectin domain family 4, member e [Source:MGI Symbol;Acc:MGI:1861232]
Avl9	ENSMUSG00000029787.8	4302.82	3527.64	4016.88	3613.19	3057.79	2744.24	3075.71	0.362873	0.000185681	0.0102842	AVL9 homolog (S. cerevisiase) [Source:MGI Symbol;Acc:MGI:1926187]
Ap3s1	ENSMUSG00000024480.7	3319.7	3673.49	3562.44	3545.92	4173.41	4104.85	4083.32	-0.227129	0.000186835	0.0103013	adaptor-related protein complex 3, sigma 1 subunit [Source:MGI Symbol;Acc:MGI:1337062]
Exo1	ENSMUSG00000039748.8	109.463	63.2019	66.7361	69.2562	144.534	174.206	190.202	-0.806242	0.000193966	0.0106463	exonuclease 1 [Source:MGI Symbol;Acc:MGI:1349427]
Gab2	ENSMUSG00000004508.5	2208.7	1799.8	2372.84	2198.39	1627.81	1556.84	1621.82	0.392548	0.0001954	0.0106769	growth factor receptor bound protein 2-associated protein 2 [Source:MGI Symbol;Acc:MGI:1333854]
Anln	ENSMUSG00000036777.7	22.5064	73.8976	187.497	104.874	457.088	271.321	537.205	-0.86829	0.000197484	0.0107426	anillin, actin binding protein [Source:MGI Symbol;Acc:MGI:1920174]
Pdk3	ENSMUSG00000035232.8	1596.93	1664.64	1740.43	1743.28	2059.6	1935.29	2062.53	-0.260174	0.000200936	0.0108818	pyruvate dehydrogenase kinase, isoenzyme 3 [Source:MGI Symbol;Acc:MGI:2384308]
Nucb1	ENSMUSG00000030824.12	25252.2	26275.5	26530.2	24777.9	31733.3	33266.3	28358.7	-0.274966	0.000213548	0.0115136	nucleobindin 1 [Source:MGI Symbol;Acc:MGI:97388]
Mcm2	ENSMUSG00000002870.7	6634.28	6360.06	6355.82	6295.39	7652.15	7211.52	7341.8	-0.20988	0.000219605	0.0117881	minichromosome maintenance deficient 2 mitotin (S. cerevisiae) [Source:MGI Symbol;Acc:MGI:105380]
Klf3	ENSMUSG00000029178.11	18014.4	18269.2	17894.8	18213.4	16267.3	15609.4	14939.7	0.20496	0.000221009	0.0118114	Kruppel-like factor 3 (basic) [Source:MGI Symbol;Acc:MGI:1342773]
F2rl2	ENSMUSG00000021675.4	1657.29	1706.45	1432.18	1802.64	2595.28	2706.2	1964.19	-0.507877	0.0002245	0.0119456	coagulation factor II (thrombin) receptor-like 2 [Source:MGI Symbol;Acc:MGI:1298208]
Pkn2	ENSMUSG00000004591.13	4434.79	4081.87	4363.27	4702.5	3529.33	3681.35	3688.99	0.262928	0.000232262	0.0123048	protein kinase N2 [Source:MGI Symbol;Acc:MGI:109211]
2700099C18Rik	ENSMUSG00000098090.4	104.348	107.929	108.049	93.9905	160.794	180.213	175.357	-0.626308	0.000237077	0.0125055	RIKEN cDNA 2700099C18 gene [Source:MGI Symbol;Acc:MGI:1924272]
Klf7	ENSMUSG00000025959.10	3241.95	3401.24	3540.19	3158.08	2482.37	2608.08	2935.61	0.302655	0.000241033	0.0126594	Kruppel-like factor 7 (ubiquitous) [Source:MGI Symbol;Acc:MGI:1935151]
Krt14	ENSMUSG00000045545.8	0	0	1.0593	0	34.3267	10.0118	57.5246	-0.654031	0.000245012	NA	keratin 14 [Source:MGI Symbol;Acc:MGI:96688]
Fancg	ENSMUSG00000028453.7	2275.2	2275.27	2057.17	2147.93	2575.41	2689.18	2739.84	-0.282617	0.000245709	0.0128497	Fanconi anemia, complementation group G [Source:MGI Symbol;Acc:MGI:1926471]
Slc16a1	ENSMUSG00000032902.1	692.584	844.961	901.467	911.214	1355.91	1032.22	1293.37	-0.505947	0.000247929	0.0128996	solute carrier family 16 (monocarboxylic acid transporters), member 1 [Source:MGI Symbol;Acc:MGI:106013]
Gpr155	ENSMUSG00000041762.13	733.505	752.589	823.078	819.202	611.558	503.595	601.224	0.416901	0.000248782	0.0128996	G protein-coupled receptor 155 [Source:MGI Symbol;Acc:MGI:1915776]
Usp40	ENSMUSG00000005501.11	1591.82	1542.13	1634.5	1581.02	1932.23	1843.18	1848.21	-0.241339	0.000257211	0.0132651	ubiquitin specific peptidase 40 [Source:MGI Symbol;Acc:MGI:2443184]
Gpi1	ENSMUSG00000036427.4	7594.9	7644.52	7956.43	7127.45	8435.34	8925.54	9028.57	-0.21699	0.000258009	0.0132651	glucose phosphate isomerase 1 [Source:MGI Symbol;Acc:MGI:95797]
Mthfr	ENSMUSG00000029009.14	1589.77	1652.97	1624.97	1753.17	1403.78	1251.48	1317.5	0.305675	0.000261043	0.0133647	5,10-methylenetetrahydrofolate reductase [Source:MGI Symbol;Acc:MGI:106639]
Gcnt2	ENSMUSG00000021360.12	1221.49	852.74	1514.8	899.341	510.384	417.493	764.52	0.742262	0.000271525	0.0138432	glucosaminyl (N-acetyl) transferase 2, I-branching enzyme [Source:MGI Symbol;Acc:MGI:1100870]
Bpgm	ENSMUSG00000038871.5	1400.51	1461.42	1408.87	1378.2	1652.2	1801.13	1680.27	-0.275078	0.000277663	0.0140972	2,3-bisphosphoglycerate mutase [Source:MGI Symbol;Acc:MGI:1098242]
Sapcd2	ENSMUSG00000026955.10	34.7827	11.668	23.3047	23.745	56.0068	79.0934	115.049	-0.860645	0.000279353	NA	suppressor APC domain containing 2 [Source:MGI Symbol;Acc:MGI:1919330]
Itga4	ENSMUSG00000027009.15	20679.3	16324.6	15259.3	16556.2	23245.5	22802.9	23187	-0.403228	0.000282131	0.0142646	integrin alpha 4 [Source:MGI Symbol;Acc:MGI:96603]
Unkl	ENSMUSG00000015127.11	1341.18	1195	1325.19	1323.78	1056.9	1043.23	985.34	0.316173	0.00028611	0.014406	unkempt-like (Drosophila) [Source:MGI Symbol;Acc:MGI:1921404]
Tcf19	ENSMUSG00000050410.12	354.988	476.445	491.517	465.995	719.958	579.685	776.582	-0.559725	0.000299111	0.0149516	transcription factor 19 [Source:MGI Symbol;Acc:MGI:103180]
Npepl1	ENSMUSG00000039263.13	4137.09	4642.91	4317.72	4611.47	5058.68	5720.76	5410.09	-0.282956	0.000300804	0.0149516	aminopeptidase-like 1 [Source:MGI Symbol;Acc:MGI:2448523]
Fasl	ENSMUSG00000000817.10	45650.2	38884.7	34863.8	38320.4	28069.3	32159	28184.3	0.392343	0.00030102	0.0149516	Fas ligand (TNF superfamily, member 6) [Source:MGI Symbol;Acc:MGI:99255]
Pask	ENSMUSG00000026274.8	41.9438	34.0318	88.9815	65.2987	128.274	148.175	196.697	-0.847457	0.000302653	0.0149516	PAS domain containing serine/threonine kinase [Source:MGI Symbol;Acc:MGI:2155936]
Glp1r	ENSMUSG00000024027.7	129.923	311.148	923.712	335.398	118.337	67.0792	91.8537	0.845949	0.000303082	0.0149516	glucagon-like peptide 1 receptor [Source:MGI Symbol;Acc:MGI:99571]
Dhcr7	ENSMUSG00000058454.11	1766.75	1672.42	1609.08	1889.7	2125.55	2284.7	2148.82	-0.326351	0.000304755	0.0149736	7-dehydrocholesterol reductase [Source:MGI Symbol;Acc:MGI:1298378]
Garem	ENSMUSG00000042680.7	309.975	247.946	340.036	274.057	413.728	457.541	444.424	-0.526873	0.000308742	0.0151085	GRB2 associated, regulator of MAPK1 [Source:MGI Symbol;Acc:MGI:2685790]
Spp1	ENSMUSG00000029304.11	688.492	967.476	2320.93	1672.04	4628.69	3273.87	5295.97	-0.855127	0.000312509	0.0152317	secreted phosphoprotein 1 [Source:MGI Symbol;Acc:MGI:98389]
Psat1	ENSMUSG00000024640.6	1798.47	1843.55	1564.59	1879.81	2352.28	2286.7	2193.36	-0.351052	0.00031692	0.0153851	phosphoserine aminotransferase 1 [Source:MGI Symbol;Acc:MGI:2183441]
Adam8	ENSMUSG00000025473.13	56.2661	67.0913	199.149	198.864	481.478	211.25	984.412	-0.833894	0.000328025	0.015861	a disintegrin and metallopeptidase domain 8 [Source:MGI Symbol;Acc:MGI:107825]
Dnajb9	ENSMUSG00000014905.3	5700.27	4202.44	5596.3	5414.84	3316.14	3605.26	4221.56	0.450749	0.000333614	0.0160086	DnaJ (Hsp40) homolog, subfamily B, member 9 [Source:MGI Symbol;Acc:MGI:1351618]
Arhgap19	ENSMUSG00000025154.11	438.875	342.263	423.721	310.663	635.045	506.598	701.429	-0.601232	0.000333704	0.0160086	Rho GTPase activating protein 19 [Source:MGI Symbol;Acc:MGI:1918335]
Hrsp12	ENSMUSG00000022323.8	602.559	651.466	618.633	591.646	854.555	884.044	737.613	-0.402518	0.000340192	0.0162559	heat-responsive protein 12 [Source:MGI Symbol;Acc:MGI:1095401]
Plcg2	ENSMUSG00000034330.9	18224.1	17138.4	14904.4	17403.1	13652.1	13624.1	12609	0.329297	0.000345599	0.0164413	phospholipase C, gamma 2 [Source:MGI Symbol;Acc:MGI:97616]
Ltb4r1	ENSMUSG00000046908.5	35.8057	73.8976	112.286	87.0649	337.847	106.125	384.116	-0.845835	0.000346773	0.0164413	leukotriene B4 receptor 1 [Source:MGI Symbol;Acc:MGI:1309472]
Man2b1	ENSMUSG00000005142.9	10284.4	11063.3	10231.8	10420.1	12466.9	11608.7	12846.5	-0.230105	0.000349978	0.016529	mannosidase 2, alpha B1 [Source:MGI Symbol;Acc:MGI:107286]
Tox	ENSMUSG00000041272.8	1653.2	1737.57	1461.84	1838.26	2027.08	2383.82	2300.98	-0.398977	0.000356579	0.0167757	thymocyte selection-associated high mobility group box [Source:MGI Symbol;Acc:MGI:2181659]
Serp2	ENSMUSG00000052584.9	216.88	170.159	138.769	186.992	297.197	363.429	282.984	-0.666123	0.000363176	0.0170204	stress-associated endoplasmic reticulum protein family member 2 [Source:MGI Symbol;Acc:MGI:1919911]
Btg2	ENSMUSG00000020423.6	114712	93403.7	89199.7	98380.4	70042.8	81927.8	70406.4	0.38847	0.000366823	0.0171255	B cell translocation gene 2, anti-proliferative [Source:MGI Symbol;Acc:MGI:108384]
Nhsl2	ENSMUSG00000079481.8	1683.89	2020.52	1685.35	1772.96	1457.08	1296.53	1163.48	0.419861	0.000379123	0.0176321	NHS-like 2 [Source:MGI Symbol;Acc:MGI:3645090]
Ndc80	ENSMUSG00000024056.9	174.936	272.254	200.208	238.439	407.404	318.376	428.651	-0.654096	0.00038685	0.0179231	NDC80 homolog, kinetochore complex component (S. cerevisiae) [Source:MGI Symbol;Acc:MGI:1914302]
Gpr174	ENSMUSG00000073008.8	2637.34	2525.16	2528.56	2889.96	3484.16	3084.64	4354.24	-0.432109	0.000417545	0.0192358	G protein-coupled receptor 174 [Source:MGI Symbol;Acc:MGI:2685222]
Grm4	ENSMUSG00000063239.13	1258.31	1011.23	899.348	1103.15	734.411	778.92	635.554	0.511933	0.000418342	0.0192358	glutamate receptor, metabotropic 4 [Source:MGI Symbol;Acc:MGI:1351341]
Kif20a	ENSMUSG00000003779.12	155.499	155.574	282.834	209.747	385.724	314.371	521.432	-0.746488	0.00043219	0.0197979	kinesin family member 20A [Source:MGI Symbol;Acc:MGI:1201682]
P2ry12	ENSMUSG00000036353.10	119.693	86.538	300.842	101.906	54.2001	29.0343	32.4735	0.830475	0.000435245	0.0198631	purinergic receptor P2Y, G-protein coupled 12 [Source:MGI Symbol;Acc:MGI:1918089]
Pgam1	ENSMUSG00000011752.6	3119.19	3283.58	3406.72	3189.74	3828.33	3645.31	3729.82	-0.203761	0.000441535	0.020075	phosphoglycerate mutase 1 [Source:MGI Symbol;Acc:MGI:97552]
Eml2	ENSMUSG00000040811.12	1990.8	1659.78	1892.97	1554.31	2227.62	2516.97	2314.9	-0.389318	0.000448171	0.020301	echinoderm microtubule associated protein like 2 [Source:MGI Symbol;Acc:MGI:1919455]
Mafk	ENSMUSG00000018143.7	15168.3	9931.45	11704.2	10816.8	7541.04	8917.54	8064.57	0.486431	0.000462947	0.0208926	v-maf musculoaponeurotic fibrosarcoma oncogene family, protein K (avian) [Source:MGI Symbol;Acc:MGI:99951]
Espl1	ENSMUSG00000058290.3	54.22	186.689	139.828	109.821	394.757	236.279	360.92	-0.821648	0.000474665	0.0213424	extra spindle pole bodies 1 (S. cerevisiae) [Source:MGI Symbol;Acc:MGI:2146156]
Timp1	ENSMUSG00000001131.8	4.09208	7.7787	14.8302	5.93625	47.8768	20.0237	89.9981	-0.754928	0.000475426	NA	tissue inhibitor of metalloproteinase 1 [Source:MGI Symbol;Acc:MGI:98752]
Ssh2	ENSMUSG00000037926.12	18448.1	14674.5	14451	14436	11436.2	11796.9	12176.7	0.368463	0.000481327	0.0215624	slingshot homolog 2 (Drosophila) [Source:MGI Symbol;Acc:MGI:2679255]
Hid1	ENSMUSG00000034586.11	2698.73	2546.55	2995.71	2623.82	2270.08	2204.6	2249.02	0.263454	0.000491358	0.0219311	HID1 domain containing [Source:MGI Symbol;Acc:MGI:2445087]
Ppat	ENSMUSG00000029246.11	2194.38	2527.1	2397.2	2512.02	2975.59	2920.45	2837.26	-0.272071	0.000498512	0.0221692	phosphoribosyl pyrophosphate amidotransferase [Source:MGI Symbol;Acc:MGI:2387203]
Cars	ENSMUSG00000010755.13	3756.53	3480.97	3775.36	4203.85	2644.06	3081.64	3156.43	0.340443	0.000500395	0.0221721	cysteinyl-tRNA synthetase [Source:MGI Symbol;Acc:MGI:1351477]
Dusp2	ENSMUSG00000027368.6	256042	180761	168072	168009	105380	151845	106957	0.572339	0.000514306	0.0227059	dual specificity phosphatase 2 [Source:MGI Symbol;Acc:MGI:101911]
Coch	ENSMUSG00000020953.13	35.8057	100.151	110.168	66.2881	184.28	217.257	204.119	-0.811545	0.000519417	0.0228487	coagulation factor C homolog (Limulus polyphemus) [Source:MGI Symbol;Acc:MGI:1278313]
Traf3	ENSMUSG00000021277.13	2218.93	1792.02	1781.75	1812.53	2597.99	2432.87	2451.29	-0.374829	0.000526372	0.0230138	TNF receptor-associated factor 3 [Source:MGI Symbol;Acc:MGI:108041]
Znrf2	ENSMUSG00000058446.11	11331	7403.38	13999.7	6764.35	18826.4	20371.1	14023.9	-0.673913	0.000526947	0.0230138	zinc and ring finger 2 [Source:MGI Symbol;Acc:MGI:1196246]
Zfp125	ENSMUSG00000069755.4	261.893	283.922	312.494	305.717	424.568	416.492	380.404	-0.451163	0.000530301	0.0230776	zinc finger protein 125 [Source:MGI Symbol;Acc:MGI:1336211]
2010310C07Rik	ENSMUSG00000101268.3	51.151	59.3126	48.7279	68.2668	17.1634	28.0331	16.7007	0.812074	0.000548679	NA	NA
Ptger2	ENSMUSG00000037759.5	179.028	153.629	183.259	258.227	325.201	312.369	367.415	-0.644755	0.000560579	0.0243084	prostaglandin E receptor 2 (subtype EP2) [Source:MGI Symbol;Acc:MGI:97794]
Pf4	ENSMUSG00000029373.6	120.716	64.1743	268.004	55.405	25.2934	16.0189	31.5457	0.790036	0.000570592	0.0246548	platelet factor 4 [Source:MGI Symbol;Acc:MGI:1888711]
Maml2	ENSMUSG00000031925.13	1142.71	1215.42	1177.95	1353.46	953.019	956.13	976.99	0.325949	0.000573761	0.0247042	mastermind like 2 (Drosophila) [Source:MGI Symbol;Acc:MGI:2389460]
Fam160a2	ENSMUSG00000044465.15	2431.72	2657.4	2630.25	2438.81	2018.95	1995.36	2252.74	0.268338	0.000582804	0.0250052	family with sequence similarity 160, member A2 [Source:MGI Symbol;Acc:MGI:1921599]
Vamp3	ENSMUSG00000028955.3	9589.79	9004.82	9820.8	8999.35	7925.86	8014.47	8419	0.195255	0.000619362	0.0264804	vesicle-associated membrane protein 3 [Source:MGI Symbol;Acc:MGI:1321389]
Scn5a	ENSMUSG00000032511.14	8.18416	1.94467	10.593	0.989374	118.337	27.0319	37.1126	-0.670209	0.000623953	NA	sodium channel, voltage-gated, type V, alpha [Source:MGI Symbol;Acc:MGI:98251]
Cry2	ENSMUSG00000068742.8	2097.19	2150.81	2012.68	1757.13	1555.54	1524.8	1630.17	0.331703	0.000632403	0.0269435	cryptochrome 2 (photolyase-like) [Source:MGI Symbol;Acc:MGI:1270859]
Dck	ENSMUSG00000029366.10	1525.32	1646.17	1712.89	1885.75	2083.09	2077.45	2597.88	-0.39185	0.000641674	0.0271539	deoxycytidine kinase [Source:MGI Symbol;Acc:MGI:102726]
Rrm1	ENSMUSG00000030978.9	4363.18	4447.47	4850.55	4386.89	5316.13	4971.87	5608.64	-0.233136	0.000641799	0.0271539	ribonucleotide reductase M1 [Source:MGI Symbol;Acc:MGI:98180]
Rsad1	ENSMUSG00000039096.7	158.568	211.97	146.184	161.268	93.9469	72.0852	103.915	0.689327	0.000659629	0.0277586	radical S-adenosyl methionine domain containing 1 [Source:MGI Symbol;Acc:MGI:3039628]
Cluh	ENSMUSG00000020741.14	3778.01	3568.48	3671.54	3577.58	2665.74	2751.25	3303.95	0.31053	0.000660648	0.0277586	clustered mitochondria (cluA/CLU1) homolog [Source:MGI Symbol;Acc:MGI:1921398]
Dnajb4	ENSMUSG00000028035.10	7299.24	5254.51	7117.46	6948.37	4153.54	5427.41	4496.19	0.45452	0.000663234	0.0277715	DnaJ (Hsp40) homolog, subfamily B, member 4 [Source:MGI Symbol;Acc:MGI:1914285]
Lad1	ENSMUSG00000041782.11	10.2302	3.88935	61.4396	21.7662	184.28	124.147	157.729	-0.725412	0.000668825	0.0279097	ladinin [Source:MGI Symbol;Acc:MGI:109343]
Hmga1-rs1	ENSMUSG00000078249.5	1143.74	1283.49	1008.46	1216.93	1604.32	1607.9	1441.83	-0.393611	0.00067823	0.0282056	high mobility group AT-hook I, related sequence 1 [Source:MGI Symbol;Acc:MGI:96161]
Lsp1	ENSMUSG00000018819.7	24869.6	25574.4	20563.2	23750.9	28702.6	32582.5	29288.4	-0.338181	0.000681616	0.02825	lymphocyte specific 1 [Source:MGI Symbol;Acc:MGI:96832]
Matk	ENSMUSG00000004933.14	59.3351	62.2296	147.243	107.842	191.507	187.221	444.424	-0.804299	0.00069732	0.0288028	megakaryocyte-associated tyrosine kinase [Source:MGI Symbol;Acc:MGI:99259]
Krt86	ENSMUSG00000067614.4	407.162	381.156	331.562	347.27	272.807	237.28	229.17	0.505092	0.000707168	0.029111	keratin 86 [Source:MGI Symbol;Acc:MGI:109362]
Abcb1a	ENSMUSG00000040584.8	5192.85	3972	4164.12	4556.07	3294.46	3618.27	3080.35	0.392666	0.000711224	0.0291198	ATP-binding cassette, sub-family B (MDR/TAP), member 1A [Source:MGI Symbol;Acc:MGI:97570]
Mis18bp1	ENSMUSG00000047534.13	240.41	180.855	194.912	168.194	351.397	271.321	341.436	-0.599108	0.000712163	0.0291198	MIS18 binding protein 1 [Source:MGI Symbol;Acc:MGI:2145099]
Lzts3	ENSMUSG00000037703.11	415.346	478.39	420.543	413.558	312.554	220.26	308.035	0.537987	0.000718518	0.0292814	leucine zipper, putative tumor suppressor family member 3 [Source:MGI Symbol;Acc:MGI:2656976]
Tubb1	ENSMUSG00000016255.5	166.752	62.2296	257.411	102.895	51.4901	19.0225	36.1848	0.790522	0.00073069	0.02964	tubulin, beta 1 class VI [Source:MGI Symbol;Acc:MGI:107814]
Cdca3	ENSMUSG00000023505.10	104.348	159.463	132.413	148.406	207.767	226.267	289.478	-0.65458	0.000732183	0.02964	cell division cycle associated 3 [Source:MGI Symbol;Acc:MGI:1315198]
Ccnd2	ENSMUSG00000000184.9	35699.3	41703.5	35955.9	34751.8	48045.7	50544.7	42024.5	-0.330709	0.000747062	0.0301422	cyclin D2 [Source:MGI Symbol;Acc:MGI:88314]
Gm26586	ENSMUSG00000097472.1	356.011	400.603	252.114	286.919	174.344	202.239	189.274	0.628108	0.000754057	0.0303241	predicted gene, 26586 [Source:MGI Symbol;Acc:MGI:5477080]
Csf3	ENSMUSG00000038067.2	0	0	0	0	54.2001	6.0071	50.102	-0.563815	0.000758697	NA	colony stimulating factor 3 (granulocyte) [Source:MGI Symbol;Acc:MGI:1339751]
Glrx	ENSMUSG00000021591.7	1477.24	1574.21	1478.79	1432.61	1755.18	1728.04	1928.93	-0.272149	0.000764271	0.0306337	glutaredoxin [Source:MGI Symbol;Acc:MGI:2135625]
Cant1	ENSMUSG00000025575.11	6955.51	6521.47	5764.73	7235.29	5385.68	4993.9	5194.84	0.330304	0.000769707	0.0307504	calcium activated nucleotidase 1 [Source:MGI Symbol;Acc:MGI:1923275]
Tsr1	ENSMUSG00000038335.10	1561.13	1617.97	1384.51	1603.78	1213.18	1083.28	1270.18	0.351388	0.000777916	0.0309768	TSR1 20S rRNA accumulation [Source:MGI Symbol;Acc:MGI:2144566]
Spns3	ENSMUSG00000020798.11	204.604	215.859	230.928	247.344	314.361	343.406	308.035	-0.473489	0.000785844	0.0311906	spinster homolog 3 [Source:MGI Symbol;Acc:MGI:1924827]
Metrnl	ENSMUSG00000039208.12	11085.4	11132.3	10614.2	9670.14	7538.33	9365.06	6812.02	0.392983	0.000801988	0.031728	meteorin, glial cell differentiation regulator-like [Source:MGI Symbol;Acc:MGI:2384806]
Abtb2	ENSMUSG00000032724.5	6451.16	5729.01	5403.5	5730.46	6735.27	7431.78	7375.21	-0.294806	0.000806564	0.0318058	ankyrin repeat and BTB (POZ) domain containing 2 [Source:MGI Symbol;Acc:MGI:2139365]
Nfatc1	ENSMUSG00000033016.12	32713.1	30346.6	26588.5	28438.6	37864.2	36243.8	35586.4	-0.301763	0.000810606	0.031862	nuclear factor of activated T cells, cytoplasmic, calcineurin dependent 1 [Source:MGI Symbol;Acc:MGI:102469]
Pmvk	ENSMUSG00000027952.13	377.494	381.156	496.813	449.176	580.845	610.722	586.379	-0.442427	0.000820951	0.0321649	phosphomevalonate kinase [Source:MGI Symbol;Acc:MGI:1915853]
St6galnac4	ENSMUSG00000079442.9	3425.07	3700.72	3581.5	3229.32	2920.48	2919.45	2958.8	0.237073	0.000826125	0.032205	ST6 (alpha-N-acetyl-neuraminyl-2,3-beta-galactosyl-1,3)-N-acetylgalactosaminide alpha-2,6-sialyltransferase 4 [Source:MGI Symbol;Acc:MGI:1341894]
Ly6c1	ENSMUSG00000079018.7	13385.2	16324.6	22073.8	16841.1	13222.1	11443.5	9209.5	0.520634	0.000827259	0.032205	lymphocyte antigen 6 complex, locus C1 [Source:MGI Symbol;Acc:MGI:96882]
Got2	ENSMUSG00000031672.7	4881.85	5224.37	5265.8	4931.04	5635.91	5711.75	5825.75	-0.177206	0.000872557	0.0338602	glutamatic-oxaloacetic transaminase 2, mitochondrial [Source:MGI Symbol;Acc:MGI:95792]
Zscan20	ENSMUSG00000061894.12	1003.58	1104.58	1079.43	959.693	825.648	849.003	772.87	0.324673	0.000877775	0.0339546	zinc finger and SCAN domains 20 [Source:MGI Symbol;Acc:MGI:2679268]
Tesk1	ENSMUSG00000028458.9	2982.1	2777.97	2662.03	2620.85	3310.72	3281.88	3300.24	-0.254629	0.000888608	0.0341891	testis specific protein kinase 1 [Source:MGI Symbol;Acc:MGI:1201675]
5031414D18Rik	ENSMUSG00000034959.7	275.192	378.239	269.063	360.132	443.538	497.588	633.698	-0.593062	0.000889449	0.0341891	RIKEN cDNA 5031414D18 gene [Source:MGI Symbol;Acc:MGI:2685590]
Naa25	ENSMUSG00000042719.14	2152.43	2130.39	2505.25	2276.55	1891.58	1799.13	1905.73	0.265789	0.00089564	0.0343188	N(alpha)-acetyltransferase 25, NatB auxiliary subunit [Source:MGI Symbol;Acc:MGI:2442563]
Tmem38b	ENSMUSG00000028420.10	686.446	840.099	791.299	779.627	1004.51	967.143	983.484	-0.336252	0.000913838	0.0348689	transmembrane protein 38B [Source:MGI Symbol;Acc:MGI:1098718]
Klra7	ENSMUSG00000067599.10	12259.9	12905.8	9998.76	13916.5	16718	18359.7	14983.3	-0.414804	0.00091572	0.0348689	killer cell lectin-like receptor, subfamily A, member 7 [Source:MGI Symbol;Acc:MGI:101901]
Ttk	ENSMUSG00000038379.12	35.8057	35.0041	86.8629	9.89374	165.31	105.124	308.963	-0.744374	0.000926922	0.0351855	Ttk protein kinase [Source:MGI Symbol;Acc:MGI:1194921]
Cdca2	ENSMUSG00000048922.15	188.236	221.693	243.64	180.066	321.587	284.336	355.353	-0.541458	0.000938833	0.0355269	cell division cycle associated 2 [Source:MGI Symbol;Acc:MGI:1919787]
Pml	ENSMUSG00000036986.13	3313.56	3129.95	3045.5	3384.65	3804.85	3657.32	4103.73	-0.258101	0.00095977	0.0360988	promyelocytic leukemia [Source:MGI Symbol;Acc:MGI:104662]
Clcn6	ENSMUSG00000029016.10	1751.41	1625.75	1613.32	1307.95	1207.76	1146.35	1180.18	0.386028	0.000959871	0.0360988	chloride channel 6 [Source:MGI Symbol;Acc:MGI:1347049]
Gimap7	ENSMUSG00000043931.9	5916.12	5771.79	4739.32	5101.21	7198.68	8510.05	6314.71	-0.418005	0.000979484	0.0367231	GTPase, IMAP family member 7 [Source:MGI Symbol;Acc:MGI:1349657]
Mtfr2	ENSMUSG00000019992.7	24.5525	72.9253	59.321	57.3837	113.82	144.17	147.523	-0.773143	0.000989101	0.0369699	mitochondrial fission regulator 2 [Source:MGI Symbol;Acc:MGI:1919054]
Tarsl2	ENSMUSG00000030515.8	463.428	372.405	327.325	429.388	523.934	668.79	623.492	-0.528242	0.00099716	0.0371559	threonyl-tRNA synthetase-like 2 [Source:MGI Symbol;Acc:MGI:2444486]
Soat2	ENSMUSG00000023045.9	2028.65	1829.94	1304	1889.7	1204.15	1249.48	1097.61	0.503593	0.00100065	0.0371559	sterol O-acyltransferase 2 [Source:MGI Symbol;Acc:MGI:1332226]
Dnajc21	ENSMUSG00000044224.13	2276.22	2272.35	2150.39	2293.37	1820.22	1981.34	1797.18	0.256033	0.00100322	0.0371559	DnaJ (Hsp40) homolog, subfamily C, member 21 [Source:MGI Symbol;Acc:MGI:1925371]
Dhrs7	ENSMUSG00000021094.9	3981.59	4070.2	3959.67	4000.04	4758.77	4956.86	4378.36	-0.231589	0.00100955	0.0372768	dehydrogenase/reductase (SDR family) member 7 [Source:MGI Symbol;Acc:MGI:1913625]
Fyco1	ENSMUSG00000025241.12	3552.95	3358.45	3451.21	3449.95	3113.8	2744.24	2814.06	0.24409	0.00103288	0.0380232	FYVE and coiled-coil domain containing 1 [Source:MGI Symbol;Acc:MGI:107277]
Ddx28	ENSMUSG00000045538.6	1852.69	2290.83	1718.19	2229.06	2644.06	3362.97	2602.52	-0.460424	0.00103844	0.0381126	DEAD (Asp-Glu-Ala-Asp) box polypeptide 28 [Source:MGI Symbol;Acc:MGI:1919236]
Traf6	ENSMUSG00000027164.8	5885.43	4839.32	5068.77	5248.63	4317.04	4260.03	4223.42	0.286262	0.00106871	0.039087	TNF receptor-associated factor 6 [Source:MGI Symbol;Acc:MGI:108072]
Bcl2a1b	ENSMUSG00000089929.1	48.0819	66.1189	100.634	76.1818	125.564	157.186	170.718	-0.724687	0.00107141	0.039087	B cell leukemia/lymphoma 2 related protein A1b [Source:MGI Symbol;Acc:MGI:1278326]
Dgka	ENSMUSG00000025357.7	9605.13	8888.14	9197.93	9290.22	10681	11415.5	16440.9	-0.436993	0.00108381	0.0394217	diacylglycerol kinase, alpha [Source:MGI Symbol;Acc:MGI:102952]
Pcdhac2	ENSMUSG00000102697.1	55.2431	251.835	645.116	232.503	46.9734	29.0343	77.9365	0.728477	0.00111237	0.0403401	NA
Dgkh	ENSMUSG00000034731.9	1107.93	1351.55	1983.02	1316.86	931.339	725.858	998.33	0.576725	0.00111757	0.0404085	diacylglycerol kinase, eta [Source:MGI Symbol;Acc:MGI:2444188]
Tgtp2	ENSMUSG00000078921.3	1351.41	1641.31	2205.47	1883.77	1312.55	1101.3	1165.34	0.495325	0.00113265	0.0408326	T cell specific GTPase 2 [Source:MGI Symbol;Acc:MGI:3710083]
2610002J02Rik	ENSMUSG00000073684.10	1507.93	1508.1	1371.8	1427.67	1741.63	1802.13	1711.82	-0.265698	0.00114351	0.0411023	RIKEN cDNA 2610002J02 gene [Source:MGI Symbol;Acc:MGI:1914763]
Gm37169	ENSMUSG00000103175.1	100.256	116.68	98.5152	123.672	186.087	219.259	156.801	-0.619501	0.00116113	0.0416128	NA
Edn1	ENSMUSG00000021367.7	210.742	621.324	1765.86	659.913	274.614	136.161	226.387	0.76027	0.00117816	0.0420262	endothelin 1 [Source:MGI Symbol;Acc:MGI:95283]
Mier2	ENSMUSG00000042570.11	1814.84	1768.68	1611.2	1754.16	2080.38	2062.44	2098.72	-0.257475	0.00118178	0.0420262	mesoderm induction early response 1, family member 2 [Source:MGI Symbol;Acc:MGI:1917677]
Wdr41	ENSMUSG00000042015.13	1223.53	1045.26	1461.84	1398.98	1626.91	1702.01	1894.6	-0.413069	0.00118301	0.0420262	WD repeat domain 41 [Source:MGI Symbol;Acc:MGI:2445123]
Cym	ENSMUSG00000046213.9	3251.16	3577.23	2299.75	3503.37	2223.11	2259.67	1656.15	0.534003	0.00119032	0.042163	chymosin [Source:MGI Symbol;Acc:MGI:2684977]
Rasa1	ENSMUSG00000021549.10	8328.4	7031.94	8313.41	8131.67	9222.15	9619.36	9567.63	-0.2511	0.00120067	0.0424061	RAS p21 protein activator 1 [Source:MGI Symbol;Acc:MGI:97860]
Slc1a5	ENSMUSG00000001918.14	6869.58	6819.97	6667.25	6981.02	7515.75	7678.07	7692.52	-0.162226	0.00121098	0.0426468	solute carrier family 1 (neutral amino acid transporter), member 5 [Source:MGI Symbol;Acc:MGI:105305]
Kctd9	ENSMUSG00000034327.14	1299.23	1371.97	1331.54	1180.32	1604.32	1498.77	1818.52	-0.329145	0.00121509	0.042668	potassium channel tetramerisation domain containing 9 [Source:MGI Symbol;Acc:MGI:2145579]
Lfng	ENSMUSG00000029570.2	16209.7	18068	14302.7	15338.3	23682.7	20759.5	18445.9	-0.37212	0.00124445	0.0435736	LFNG O-fucosylpeptide 3-beta-N-acetylglucosaminyltransferase [Source:MGI Symbol;Acc:MGI:1095413]
Chpt1	ENSMUSG00000060002.11	3275.71	3218.44	3747.81	3447.97	2939.45	2635.11	2925.4	0.257975	0.00129278	0.0451361	choline phosphotransferase 1 [Source:MGI Symbol;Acc:MGI:2384841]
Cd55	ENSMUSG00000026399.9	2567.78	2148.87	2742.54	3139.28	3356.79	3481.11	5598.44	-0.550152	0.00133662	0.0465334	CD55 antigen [Source:MGI Symbol;Acc:MGI:104850]
Myo19	ENSMUSG00000020527.11	421.484	550.343	528.592	489.74	327.007	379.448	354.426	0.441416	0.0013661	0.0474243	myosin XIX [Source:MGI Symbol;Acc:MGI:1913446]
Dennd3	ENSMUSG00000036661.10	3044.51	2864.51	4282.76	2633.71	2284.53	2090.47	2240.67	0.473392	0.0013704	0.047433	DENN/MADD domain containing 3 [Source:MGI Symbol;Acc:MGI:2146009]
Rilpl2	ENSMUSG00000029401.8	2483.89	2670.04	2396.14	2319.09	2860.86	3243.83	2940.25	-0.283848	0.00137414	0.047433	Rab interacting lysosomal protein-like 2 [Source:MGI Symbol;Acc:MGI:1933112]
Scml4	ENSMUSG00000044770.11	2386.7	2044.83	1816.7	2019.31	2593.48	2594.06	2892	-0.362449	0.00138682	0.0477247	sex comb on midleg-like 4 (Drosophila) [Source:MGI Symbol;Acc:MGI:2446140]
Fxyd5	ENSMUSG00000009687.11	25094.7	26275.5	21703	22958.4	31175	32327.2	27224.9	-0.322372	0.00139042	0.0477247	FXYD domain-containing ion transport regulator 5 [Source:MGI Symbol;Acc:MGI:1201785]
Nudt21	ENSMUSG00000031754.9	3133.51	3179.54	3056.09	2939.43	3435.38	3803.49	3568.38	-0.227444	0.00142403	0.0485867	nudix (nucleoside diphosphate linked moiety X)-type motif 21 [Source:MGI Symbol;Acc:MGI:1915469]
Slc16a9	ENSMUSG00000037762.6	235.295	726.336	1856.96	870.649	306.231	141.167	318.241	0.749809	0.00142453	0.0485867	solute carrier family 16 (monocarboxylic acid transporters), member 9 [Source:MGI Symbol;Acc:MGI:1914109]
Stradb	ENSMUSG00000026027.10	1135.55	1083.18	1195.95	1195.16	1466.11	1304.54	1416.77	-0.273338	0.00143111	0.0485867	STE20-related kinase adaptor beta [Source:MGI Symbol;Acc:MGI:2144047]
Prss34	ENSMUSG00000056399.1	0	42.7828	12.7116	19.7875	1735.31	1051.24	810.911	-0.528081	0.0014315	0.0485867	protease, serine 34 [Source:MGI Symbol;Acc:MGI:2681414]
Cenpn	ENSMUSG00000031756.4	58.3121	102.095	93.2187	96.9587	172.537	132.156	236.593	-0.708744	0.00143547	0.0485867	centromere protein N [Source:MGI Symbol;Acc:MGI:1919405]
Tshz1	ENSMUSG00000046982.10	1056.78	1292.24	1646.16	1084.35	1861.77	1907.25	1711.82	-0.474592	0.00144415	0.0487451	teashirt zinc finger family member 1 [Source:MGI Symbol;Acc:MGI:1346031]
Hk3	ENSMUSG00000025877.11	293.607	313.093	355.926	348.26	594.395	366.433	869.363	-0.665154	0.00147192	0.0495453	hexokinase 3 [Source:MGI Symbol;Acc:MGI:2670962]
Pigx	ENSMUSG00000023791.11	1674.68	1726.87	1569.89	1583.99	2015.34	2052.42	1870.48	-0.268685	0.00149175	0.0500744	phosphatidylinositol glycan anchor biosynthesis, class X [Source:MGI Symbol;Acc:MGI:1919334]
Gsr	ENSMUSG00000031584.13	4562.67	4427.05	4515.81	4348.3	5495.89	4876.76	5127.11	-0.212644	0.00151297	0.050647	glutathione reductase [Source:MGI Symbol;Acc:MGI:95804]
Nfu1	ENSMUSG00000029993.13	784.656	787.593	772.232	814.255	924.112	948.12	979.773	-0.264253	0.00152298	0.0508427	NFU1 iron-sulfur cluster scaffold homolog (S. cerevisiae) [Source:MGI Symbol;Acc:MGI:1913290]
Rassf1	ENSMUSG00000010067.10	5034.28	4807.24	4260.52	4427.45	3688.32	3898.61	3078.49	0.354107	0.00154518	0.0513185	Ras association (RalGDS/AF-6) domain family member 1 [Source:MGI Symbol;Acc:MGI:1928386]
Basp1	ENSMUSG00000045763.7	130.947	130.293	218.216	211.726	310.747	258.305	415.661	-0.674266	0.00154748	0.0513185	brain abundant, membrane attached signal protein 1 [Source:MGI Symbol;Acc:MGI:1917600]
Homez	ENSMUSG00000057156.10	509.464	516.311	515.881	488.751	772.352	642.759	614.214	-0.390377	0.00154987	0.0513185	homeodomain leucine zipper-encoding gene [Source:MGI Symbol;Acc:MGI:2678023]
Klf10	ENSMUSG00000037465.9	7535.56	8409.75	8290.11	8572.93	11341.4	10023.8	9075.89	-0.300602	0.0015543	0.0513257	Kruppel-like factor 10 [Source:MGI Symbol;Acc:MGI:1101353]
Sbds	ENSMUSG00000025337.7	4506.4	4561.23	5082.54	4791.54	3958.41	4237.01	4021.15	0.207126	0.00156609	0.0514749	Shwachman-Bodian-Diamond syndrome homolog (human) [Source:MGI Symbol;Acc:MGI:1913961]
Gtse1	ENSMUSG00000022385.10	247.571	175.021	183.259	213.705	305.327	293.347	368.343	-0.552139	0.00156727	0.0514749	G two S phase expressed protein 1 [Source:MGI Symbol;Acc:MGI:1352755]
Cdc25c	ENSMUSG00000044201.9	31.7136	23.3361	45.55	29.6812	60.5235	76.0899	94.6372	-0.738114	0.00158183	NA	cell division cycle 25C [Source:MGI Symbol;Acc:MGI:88350]
Simc1	ENSMUSG00000043183.15	1119.18	992.756	1315.65	1158.56	836.488	863.02	928.743	0.357909	0.00162797	0.0533246	SUMO-interacting motifs containing 1 [Source:MGI Symbol;Acc:MGI:2442599]
Hmmr	ENSMUSG00000020330.13	82.8646	49.5892	151.48	40.5643	275.517	148.175	287.623	-0.746175	0.00164463	0.0537259	hyaluronan mediated motility receptor (RHAMM) [Source:MGI Symbol;Acc:MGI:104667]
Gna13	ENSMUSG00000020611.11	10011.3	8862.85	10202.1	8252.37	7297.14	7629.01	7833.55	0.28184	0.00165099	0.0537898	guanine nucleotide binding protein, alpha 13 [Source:MGI Symbol;Acc:MGI:95768]
Itgb4	ENSMUSG00000020758.12	65.4733	101.123	213.979	111.799	485.091	185.219	323.808	-0.745762	0.00166921	0.0542383	integrin beta 4 [Source:MGI Symbol;Acc:MGI:96613]
Gm9917	ENSMUSG00000097099.2	155.499	183.772	388.764	216.673	101.174	121.143	96.4928	0.717047	0.00169218	0.0548383	predicted gene 9917 [Source:MGI Symbol;Acc:MGI:3704343]
Crlf2	ENSMUSG00000033467.9	1735.04	1834.8	1660.99	1924.33	2204.14	2413.85	2064.39	-0.30745	0.00171086	0.0552967	cytokine receptor-like factor 2 [Source:MGI Symbol;Acc:MGI:1889506]
Zbtb20	ENSMUSG00000022708.13	6110.5	5803.88	6791.19	7141.3	5167.08	5390.37	5363.7	0.268268	0.00174633	0.0562937	zinc finger and BTB domain containing 20 [Source:MGI Symbol;Acc:MGI:1929213]
Prss16	ENSMUSG00000006179.5	31.7136	21.3914	14.8302	12.8619	65.9435	75.0887	42.6795	-0.739667	0.00176999	NA	protease, serine 16 (thymus) [Source:MGI Symbol;Acc:MGI:1859181]
Emilin2	ENSMUSG00000024053.10	20628.2	19682.1	17473.2	20373.2	25090.1	23908.2	22319.5	-0.277636	0.00177282	0.0569967	elastin microfibril interfacer 2 [Source:MGI Symbol;Acc:MGI:2389136]
Mid2	ENSMUSG00000000266.8	169.821	458.943	1630.27	474.9	206.864	112.132	177.213	0.720886	0.00179674	0.0576141	midline 2 [Source:MGI Symbol;Acc:MGI:1344333]
Kif23	ENSMUSG00000032254.9	282.353	189.606	395.12	357.164	612.461	409.484	730.191	-0.670899	0.00180688	0.0577868	kinesin family member 23 [Source:MGI Symbol;Acc:MGI:1919069]
Kif20b	ENSMUSG00000024795.10	1053.71	1040.4	1019.05	954.746	1161.69	1259.49	1462.24	-0.333961	0.00183605	0.0585663	kinesin family member 20B [Source:MGI Symbol;Acc:MGI:2444576]
Smc4	ENSMUSG00000034349.11	5217.4	5084.35	4714.96	5161.57	5508.54	6266.4	7140.47	-0.310981	0.00185614	0.0590524	structural maintenance of chromosomes 4 [Source:MGI Symbol;Acc:MGI:1917349]
Car9	ENSMUSG00000028463.11	23.5295	42.7828	32.8384	25.7237	77.6868	57.0674	85.359	-0.726862	0.00188287	NA	carbonic anhydrase 9 [Source:MGI Symbol;Acc:MGI:2447188]
Tgfbrap1	ENSMUSG00000070939.6	5181.59	4654.58	4785.93	4312.68	3995.45	3756.44	3997.03	0.259334	0.00189824	0.0600644	transforming growth factor, beta receptor associated protein 1 [Source:MGI Symbol;Acc:MGI:2447427]
Cyp26b1	ENSMUSG00000063415.9	18.4144	188.633	118.642	331.44	30.7134	12.0142	18.5563	0.655159	0.00190042	0.0600644	cytochrome P450, family 26, subfamily b, polypeptide 1 [Source:MGI Symbol;Acc:MGI:2176159]
Ptger4	ENSMUSG00000039942.12	29256.3	19318.4	20134.2	20743.2	12653	17762	15363.7	0.480829	0.00190274	0.0600644	prostaglandin E receptor 4 (subtype EP4) [Source:MGI Symbol;Acc:MGI:104311]
Pirb	ENSMUSG00000058818.10	64.4502	101.123	238.343	196.885	629.625	162.192	673.594	-0.727873	0.00190873	0.0600977	paired Ig-like receptor B [Source:MGI Symbol;Acc:MGI:894311]
Rnf103	ENSMUSG00000052656.9	5514.08	4980.31	5513.67	5276.33	4601.59	4642.48	4684.54	0.187543	0.00194216	0.0609927	ring finger protein 103 [Source:MGI Symbol;Acc:MGI:109483]
Nebl	ENSMUSG00000053702.13	750.896	714.668	1389.81	734.116	469.734	423.5	602.152	0.631442	0.00197153	0.0617562	nebulette [Source:MGI Symbol;Acc:MGI:1921353]
Cd7	ENSMUSG00000025163.6	4906.4	5097.96	3797.6	4738.11	5916.85	7020.29	5678.23	-0.392392	0.00200149	0.0622571	CD7 antigen [Source:MGI Symbol;Acc:MGI:88344]
Prkcsh	ENSMUSG00000003402.10	4138.11	4458.17	4151.41	4164.28	4769.61	5069.99	4745.78	-0.203032	0.00200228	0.0622571	protein kinase C substrate 80K-H [Source:MGI Symbol;Acc:MGI:107877]
Igkv14-111	ENSMUSG00000095771.2	47.0589	30.1425	42.3721	78.1606	79.4935	177.209	137.317	-0.732922	0.00200285	0.0622571	immunoglobulin kappa variable 14-111 [Source:MGI Symbol;Acc:MGI:4439863]
Wdr90	ENSMUSG00000073434.8	1484.4	1324.32	1305.06	1341.59	1770.54	1556.84	2306.55	-0.422981	0.00201784	0.0625005	WD repeat domain 90 [Source:MGI Symbol;Acc:MGI:1921267]
Atp5g3	ENSMUSG00000018770.6	6417.4	7058.2	6793.31	6495.24	7666.61	8151.63	7387.27	-0.21072	0.00202095	0.0625005	ATP synthase, H+ transporting, mitochondrial F0 complex, subunit C3 (subunit 9) [Source:MGI Symbol;Acc:MGI:2442035]
Gnl1	ENSMUSG00000024429.9	2327.37	2707.96	2409.91	2543.68	2886.16	3105.67	2962.52	-0.254479	0.00203869	0.0628495	guanine nucleotide binding protein-like 1 [Source:MGI Symbol;Acc:MGI:95764]
Trim35	ENSMUSG00000022043.15	5405.64	5948.76	8800.69	6118.29	4836.46	4194.96	4783.82	0.450114	0.00204482	0.0628495	tripartite motif-containing 35 [Source:MGI Symbol;Acc:MGI:1914104]
Pcbp3	ENSMUSG00000001120.12	632.226	692.304	1430.06	835.032	569.101	413.488	442.568	0.653586	0.0020477	0.0628495	poly(rC) binding protein 3 [Source:MGI Symbol;Acc:MGI:1890470]
Haus2	ENSMUSG00000027285.10	5054.74	4058.54	4094.21	3901.1	2971.07	3418.04	3458.9	0.353642	0.00207302	0.0632299	HAUS augmin-like complex, subunit 2 [Source:MGI Symbol;Acc:MGI:1913546]
Slc43a2	ENSMUSG00000038178.13	1938.62	1912.59	1660.99	1699.74	2252.92	2086.46	2462.42	-0.318327	0.00207426	0.0632299	solute carrier family 43, member 2 [Source:MGI Symbol;Acc:MGI:2442746]
Tnfrsf12a	ENSMUSG00000023905.11	435.806	522.145	521.177	497.655	643.175	595.704	695.862	-0.364258	0.00207566	0.0632299	tumor necrosis factor receptor superfamily, member 12a [Source:MGI Symbol;Acc:MGI:1351484]
9930104L06Rik	ENSMUSG00000044730.12	1536.58	1460.45	1457.6	1506.82	1321.58	1159.37	1197.81	0.265901	0.00212356	0.0645276	RIKEN cDNA 9930104L06 gene [Source:MGI Symbol;Acc:MGI:3041172]
Cnst	ENSMUSG00000038949.8	2965.73	2665.18	2976.64	2460.57	2291.76	2282.7	2098.72	0.295193	0.00213571	0.064723	consortin, connexin sorting protein [Source:MGI Symbol;Acc:MGI:2445141]
Prkch	ENSMUSG00000021108.14	35051.7	34841.8	33374.4	33727.8	39554.3	43635.6	37274.1	-0.229369	0.00214478	0.064723	protein kinase C, eta [Source:MGI Symbol;Acc:MGI:97600]
C030034L19Rik	ENSMUSG00000097365.4	126.854	118.625	179.022	124.661	60.5235	74.0875	88.1425	0.64317	0.00214593	0.064723	RIKEN cDNA C030034L19 gene [Source:MGI Symbol;Acc:MGI:2444519]
4931406P16Rik	ENSMUSG00000066571.10	2959.6	3093	5227.66	3271.86	2483.27	2146.54	2489.33	0.516617	0.00217796	0.065527	RIKEN cDNA 4931406P16 gene [Source:MGI Symbol;Acc:MGI:1924311]
Jrkl	ENSMUSG00000079083.2	479.796	468.667	586.854	539.209	411.017	372.44	322.88	0.43559	0.00218623	0.0656139	Jrk-like [Source:MGI Symbol;Acc:MGI:1924782]
Nuak2	ENSMUSG00000009772.12	3584.66	3677.38	3348.46	3358.93	3070.44	2914.44	2874.37	0.230405	0.00219993	0.0658627	NUAK family, SNF1-like kinase, 2 [Source:MGI Symbol;Acc:MGI:1921387]
Etv4	ENSMUSG00000017724.11	10.2302	0	8.47442	1.97875	50.5868	44.052	39.8961	-0.590341	0.00221235	NA	ets variant 4 [Source:MGI Symbol;Acc:MGI:99423]
Egln1	ENSMUSG00000031987.5	2174.94	1389.47	3407.78	1198.13	4214.06	4618.46	3150.86	-0.674167	0.00221708	0.0662134	egl-9 family hypoxia-inducible factor 1 [Source:MGI Symbol;Acc:MGI:1932286]
Nup54	ENSMUSG00000034826.11	3031.21	2994.8	2959.69	3360.9	2576.31	2677.16	2511.6	0.241371	0.00222817	0.066382	nucleoporin 54 [Source:MGI Symbol;Acc:MGI:1920460]
Traf5	ENSMUSG00000026637.10	2649.62	2631.14	2814.57	3191.72	3309.82	3527.17	3442.2	-0.275298	0.00223957	0.0665589	TNF receptor-associated factor 5 [Source:MGI Symbol;Acc:MGI:107548]
Zfpm1	ENSMUSG00000049577.11	7731.98	4406.63	8971.24	4147.46	10744.3	12496.8	9477.64	-0.61301	0.00224712	0.066621	zinc finger protein, multitype 1 [Source:MGI Symbol;Acc:MGI:1095400]
Crip1	ENSMUSG00000006360.8	1967.27	1948.56	2756.31	1779.88	2856.35	2776.28	3106.33	-0.426164	0.00229088	0.0677534	cysteine-rich protein 1 (intestinal) [Source:MGI Symbol;Acc:MGI:88501]
Brwd1	ENSMUSG00000022914.12	5598.99	5090.19	5481.89	4883.55	4448.02	4513.33	4525.88	0.216514	0.00229801	0.0677996	bromodomain and WD repeat domain containing 1 [Source:MGI Symbol;Acc:MGI:1890651]
Mtmr10	ENSMUSG00000030522.11	1330.95	1044.29	1728.78	1388.09	910.562	793.938	1060.49	0.49161	0.00230391	0.0678095	myotubularin related protein 10 [Source:MGI Symbol;Acc:MGI:2142292]
Lrp8	ENSMUSG00000028613.11	22.5064	78.7593	59.321	30.6706	141.824	86.1017	213.398	-0.716686	0.00234254	0.0687805	low density lipoprotein receptor-related protein 8, apolipoprotein e receptor [Source:MGI Symbol;Acc:MGI:1340044]
Wfdc21	ENSMUSG00000051748.2	1.02302	1.94467	8.47442	1.97875	39.7467	6.0071	115.049	-0.535791	0.00236142	NA	WAP four-disulfide core domain 21 [Source:MGI Symbol;Acc:MGI:1913357]
Cenpf	ENSMUSG00000026605.11	51.151	70.0083	202.327	93.9905	278.227	223.264	314.529	-0.720855	0.0023781	0.0695278	centromere protein F [Source:MGI Symbol;Acc:MGI:1313302]
Nop56	ENSMUSG00000027405.13	9637.87	9656.28	8792.22	10148	8064.98	7964.41	8370.75	0.222426	0.00237941	0.0695278	NOP56 ribonucleoprotein [Source:MGI Symbol;Acc:MGI:1914384]
Dse	ENSMUSG00000039497.7	5193.87	4072.15	4336.79	4290.92	3697.35	3550.19	3355.91	0.317234	0.00243676	0.0709573	dermatan sulfate epimerase [Source:MGI Symbol;Acc:MGI:2443455]
Esco2	ENSMUSG00000022034.9	6.13812	33.0595	75.2105	36.6068	126.467	138.163	184.635	-0.6827	0.00243998	0.0709573	establishment of cohesion 1 homolog 2 (S. cerevisiae) [Source:MGI Symbol;Acc:MGI:1919238]
Gm25436	ENSMUSG00000088900.1	56.2661	49.5892	26.4826	57.3837	101.174	127.15	90.9259	-0.704187	0.00244706	NA	predicted gene, 25436 [Source:MGI Symbol;Acc:MGI:5455213]
Ap5s1	ENSMUSG00000068264.8	885.935	846.906	852.739	884.501	1043.35	1094.29	997.402	-0.264505	0.00244918	0.0710553	adaptor-related protein 5 complex, sigma 1 subunit [Source:MGI Symbol;Acc:MGI:1916846]
Gna14	ENSMUSG00000024697.3	80.8185	344.207	679.013	308.685	135.5	68.0804	78.8643	0.703188	0.00247173	0.0715392	guanine nucleotide binding protein, alpha 14 [Source:MGI Symbol;Acc:MGI:95769]
Tnks1bp1	ENSMUSG00000033955.9	1985.68	1800.77	2274.32	1631.48	1511.28	1486.76	1353.68	0.370482	0.00251418	0.0725956	tankyrase 1 binding protein 1 [Source:MGI Symbol;Acc:MGI:2446193]
Rgs16	ENSMUSG00000026475.7	4588.24	2066.22	4245.69	2319.09	3971.96	7738.14	7316.75	-0.659883	0.00253361	0.072719	regulator of G-protein signaling 16 [Source:MGI Symbol;Acc:MGI:108407]
Ralgapa2	ENSMUSG00000037110.16	3371.87	2762.41	3333.63	3482.6	2729.88	2486.94	2543.14	0.302666	0.00253541	0.072719	Ral GTPase activating protein, alpha subunit 2 (catalytic) [Source:MGI Symbol;Acc:MGI:3036245]
Csf3r	ENSMUSG00000028859.11	49.1049	95.2891	206.564	194.907	760.608	174.206	1651.51	-0.612542	0.00253636	0.072719	colony stimulating factor 3 receptor (granulocyte) [Source:MGI Symbol;Acc:MGI:1339755]
Nr1d2	ENSMUSG00000021775.10	7244	5015.32	6731.87	6426.97	4976.47	4222.99	5009.28	0.385307	0.00254674	0.0728453	nuclear receptor subfamily 1, group D, member 2 [Source:MGI Symbol;Acc:MGI:2449205]
Ipo4	ENSMUSG00000002319.12	1765.73	1756.04	1983.02	1819.46	1489.6	1577.86	1591.2	0.225477	0.00258377	0.0737313	importin 4 [Source:MGI Symbol;Acc:MGI:1923001]
Gm4980	ENSMUSG00000096606.2	40.9208	63.2019	77.3291	57.3837	133.694	80.0946	234.737	-0.713185	0.00259805	0.0739035	predicted gene 4980 [Source:MGI Symbol;Acc:MGI:3646425]
Ak2	ENSMUSG00000028792.11	1928.39	2043.85	2166.27	1903.56	2316.15	2322.74	2868.81	-0.306059	0.00260194	0.0739035	adenylate kinase 2 [Source:MGI Symbol;Acc:MGI:87978]
Pum1	ENSMUSG00000028580.12	11062.9	10585.8	10886.5	9918.48	9441.66	8956.58	9390.42	0.187211	0.00261754	0.0741737	pumilio RNA-binding family member 1 [Source:MGI Symbol;Acc:MGI:1931749]
4930579G24Rik	ENSMUSG00000027811.9	730.436	746.755	636.641	604.508	884.365	895.057	864.724	-0.35488	0.00263392	0.0744648	RIKEN cDNA 4930579G24 gene [Source:MGI Symbol;Acc:MGI:1923189]
Pth1r	ENSMUSG00000032492.11	472.635	567.845	389.824	591.646	320.684	319.377	361.848	0.506344	0.00264258	0.0745366	parathyroid hormone 1 receptor [Source:MGI Symbol;Acc:MGI:97801]
Pim1	ENSMUSG00000024014.7	50939.2	45513.2	46122.1	44219.1	50289.6	63298.8	58263.1	-0.287295	0.00265553	0.0746224	proviral integration site 1 [Source:MGI Symbol;Acc:MGI:97584]
Txnrd3	ENSMUSG00000000811.10	988.237	991.784	985.152	988.385	813.905	857.012	815.55	0.241257	0.00265787	0.0746224	thioredoxin reductase 3 [Source:MGI Symbol;Acc:MGI:2386711]
Siah2	ENSMUSG00000036432.8	4023.54	3094.95	3583.62	3196.67	2369.45	2785.29	2843.75	0.352244	0.00268445	0.0751954	seven in absentia 2 [Source:MGI Symbol;Acc:MGI:108062]
2004-09-01	ENSMUSG00000020486.15	2646.55	3347.76	5603.71	3092.78	2253.82	2306.73	2234.18	0.556677	0.00269664	0.0753637	septin 4 [Source:MGI Symbol;Acc:MGI:1270156]
Syt8	ENSMUSG00000031098.14	18.4144	9.72337	9.53373	1.97875	71.3635	26.0308	52.8855	-0.640119	0.00270838	NA	synaptotagmin VIII [Source:MGI Symbol;Acc:MGI:1859867]
Mxd3	ENSMUSG00000021485.10	22.5064	23.3361	48.7279	39.575	74.9768	67.0792	105.771	-0.709457	0.00271249	NA	Max dimerization protein 3 [Source:MGI Symbol;Acc:MGI:104987]
Igf2r	ENSMUSG00000023830.10	2064.45	1727.84	2206.53	2104.4	2513.08	2351.78	2764.89	-0.316974	0.00271432	0.0756843	insulin-like growth factor 2 receptor [Source:MGI Symbol;Acc:MGI:96435]
Mtap	ENSMUSG00000062937.5	1313.56	1363.22	1399.34	1807.59	2152.65	1783.11	2008.72	-0.398418	0.00272611	0.0758395	methylthioadenosine phosphorylase [Source:MGI Symbol;Acc:MGI:1914152]
Kdm3a	ENSMUSG00000053470.10	10010.2	8292.09	9559.15	9681.03	8094.79	7791.2	7575.61	0.248967	0.00273725	0.0759759	lysine (K)-specific demethylase 3A [Source:MGI Symbol;Acc:MGI:98847]
Oip5	ENSMUSG00000072980.3	50.128	40.8382	55.0838	58.3731	157.18	76.0899	98.3484	-0.69181	0.00275129	0.0761919	Opa interacting protein 5 [Source:MGI Symbol;Acc:MGI:1917895]
Strn4	ENSMUSG00000030374.12	8983.14	9019.4	9338.82	8829.18	8249.26	8245.74	8249.21	0.125651	0.0027756	0.0766909	striatin, calmodulin binding protein 4 [Source:MGI Symbol;Acc:MGI:2142346]
Unc45b	ENSMUSG00000018845.11	119.693	308.231	1084.73	396.739	145.437	97.1147	140.1	0.692576	0.0028148	0.0773863	unc-45 homolog B (C. elegans) [Source:MGI Symbol;Acc:MGI:2443377]
Fam120a	ENSMUSG00000038014.7	4333.51	3652.1	5470.24	3706.2	6306.18	5563.57	5577.1	-0.4067	0.002817	0.0773863	family with sequence similarity 120, member A [Source:MGI Symbol;Acc:MGI:2446163]
1700084C06Rik	ENSMUSG00000086016.1	767.265	728.281	605.921	739.063	915.982	1091.29	879.569	-0.403459	0.00281982	0.0773863	RIKEN cDNA 1700084C06 gene [Source:MGI Symbol;Acc:MGI:1923868]
Plekha7	ENSMUSG00000045659.14	1489.52	1477.95	1212.9	1421.73	1143.62	1091.29	1038.23	0.334478	0.00283062	0.077508	pleckstrin homology domain containing, family A member 7 [Source:MGI Symbol;Acc:MGI:2445094]
Gfra2	ENSMUSG00000022103.9	5642.98	6345.47	5284.86	4619.39	7400.12	7716.12	6365.74	-0.365325	0.00284081	0.0776127	glial cell line derived neurotrophic factor family receptor alpha 2 [Source:MGI Symbol;Acc:MGI:1195462]
Mta1	ENSMUSG00000021144.11	1805.63	1011.23	2131.32	1086.33	2501.34	2963.5	2274.08	-0.60006	0.00287683	0.0783519	metastasis associated 1 [Source:MGI Symbol;Acc:MGI:2150037]
Cep55	ENSMUSG00000024989.11	233.248	133.21	224.572	165.225	385.724	248.293	386.899	-0.626912	0.00288073	0.0783519	centrosomal protein 55 [Source:MGI Symbol;Acc:MGI:1921357]
Gm16194	ENSMUSG00000084956.4	3.06906	7.7787	2.11861	11.8725	50.5868	15.0177	46.3908	-0.610814	0.00289966	NA	predicted gene 16194 [Source:MGI Symbol;Acc:MGI:3801773]
Acap3	ENSMUSG00000029033.13	4881.85	4542.76	4886.57	5048.78	4001.77	4216.98	4370.01	0.196336	0.0029019	0.0787519	ArfGAP with coiled-coil, ankyrin repeat and PH domains 3 [Source:MGI Symbol;Acc:MGI:2153589]
Wfdc17	ENSMUSG00000069792.5	4.09208	9.72337	59.321	49.4687	181.57	49.058	437.929	-0.580817	0.00297126	0.0803001	WAP four-disulfide core domain 17 [Source:MGI Symbol;Acc:MGI:3649773]
Casp3	ENSMUSG00000031628.8	2056.27	1803.69	1798.7	2025.25	2365.83	2326.75	2256.45	-0.265216	0.00297213	0.0803001	caspase 3 [Source:MGI Symbol;Acc:MGI:107739]
Htra1	ENSMUSG00000006205.10	126.854	167.242	441.729	96.9587	560.068	359.425	845.24	-0.702726	0.00297974	0.0803247	HtrA serine peptidase 1 [Source:MGI Symbol;Acc:MGI:1929076]
Yam1	ENSMUSG00000098178.1	9831.22	9203.17	6353.7	7046.32	9193.24	13592.1	13737.2	-0.501424	0.00299444	0.0803247	YY1 associated myogenesis RNA 1 [Source:MGI Symbol;Acc:MGI:5504039]
Rab32	ENSMUSG00000019832.3	508.441	560.066	618.633	737.084	870.815	737.872	1005.75	-0.46432	0.00299797	0.0803247	RAB32, member RAS oncogene family [Source:MGI Symbol;Acc:MGI:1915094]
Kntc1	ENSMUSG00000029414.8	29.6676	27.2254	98.5152	44.5218	144.534	87.1029	244.943	-0.692995	0.0029994	0.0803247	kinetochore associated 1 [Source:MGI Symbol;Acc:MGI:2673709]
Pim2	ENSMUSG00000031155.11	4314.07	5120.33	5076.18	5587	5877.1	6087.19	6476.15	-0.28415	0.00303457	0.0810112	proviral integration site 2 [Source:MGI Symbol;Acc:MGI:97587]
Chsy1	ENSMUSG00000032640.9	7561.14	5354.66	7496.69	4170.21	10073.1	11260.3	7614.58	-0.540631	0.00304228	0.0810112	chondroitin sulfate synthase 1 [Source:MGI Symbol;Acc:MGI:2681120]
Ppp1r13b	ENSMUSG00000021285.11	5714.59	5732.9	6764.71	6178.64	4921.37	5158.09	5397.1	0.228279	0.00304499	0.0810112	protein phosphatase 1, regulatory (inhibitor) subunit 13B [Source:MGI Symbol;Acc:MGI:1336199]
D10Jhu81e	ENSMUSG00000053329.6	1656.27	1800.77	1902.51	1700.73	2238.46	2096.48	1983.67	-0.253024	0.00309391	0.0820755	DNA segment, Chr 10, Johns Hopkins University 81 expressed [Source:MGI Symbol;Acc:MGI:1351861]
Rnf149	ENSMUSG00000048234.10	1077.24	1173.61	1442.77	1363.36	1644.97	1489.76	1902.95	-0.382702	0.00310201	0.0820755	ring finger protein 149 [Source:MGI Symbol;Acc:MGI:2677438]
Wdr45b	ENSMUSG00000025173.10	5597.96	5198.12	5777.44	5460.36	4699.15	4915.81	4945.26	0.173865	0.00310519	0.0820755	WD repeat domain 45B [Source:MGI Symbol;Acc:MGI:1914090]
Med20	ENSMUSG00000092558.3	3493.61	3606.4	3652.48	3520.19	3098.44	3154.73	2658.19	0.249583	0.00313965	0.0828066	mediator complex subunit 20 [Source:MGI Symbol;Acc:MGI:1929648]
Trbj1-1	ENSMUSG00000076483.1	5603.08	5424.67	4482.97	5069.55	6167.97	7193.5	6133.79	-0.322419	0.00315093	0.0829245	T cell receptor beta joining 1-1 [Source:MGI Symbol;Acc:MGI:4439570]
Tmem8	ENSMUSG00000024180.10	1884.4	2150.81	2078.35	1975.78	1696.46	1763.08	1555.95	0.258867	0.00317693	0.0834128	transmembrane protein 8 (five membrane-spanning domains) [Source:MGI Symbol;Acc:MGI:1926283]
Ipo5	ENSMUSG00000030662.9	5080.32	4473.72	4600.55	4554.09	3890.66	3691.36	4197.44	0.239746	0.00318317	0.0834128	importin 5 [Source:MGI Symbol;Acc:MGI:1917822]
Tnfsf14	ENSMUSG00000005824.6	600.513	757.451	717.148	733.126	983.732	1253.48	808.127	-0.469437	0.00319414	0.0835207	tumor necrosis factor (ligand) superfamily, member 14 [Source:MGI Symbol;Acc:MGI:1355317]
Lrp6	ENSMUSG00000030201.12	3193.87	2811.03	3083.63	2465.52	2435.39	2118.5	2232.32	0.326397	0.00320535	0.0836342	low density lipoprotein receptor-related protein 6 [Source:MGI Symbol;Acc:MGI:1298218]
Rnf113a2	ENSMUSG00000098134.1	4092.08	3318.59	3037.02	3254.05	2481.46	2817.33	2557.99	0.356144	0.00324841	0.0845768	ring finger protein 113A2 [Source:MGI Symbol;Acc:MGI:1913631]
Plek	ENSMUSG00000020120.12	54916.7	43731.8	45096.7	49577.5	59725.8	60046.9	57017	-0.279081	0.00327069	0.0849752	pleckstrin [Source:MGI Symbol;Acc:MGI:1860485]
Etv3	ENSMUSG00000003382.15	5272.64	2910.21	3437.44	3568.67	2375.77	2590.06	2644.27	0.493176	0.00328449	0.0851461	ets variant 3 [Source:MGI Symbol;Acc:MGI:1350926]
Bag5	ENSMUSG00000049792.6	2814.33	2661.29	3216.04	2866.22	2432.68	2488.94	2199.85	0.26597	0.00329124	0.0851461	BCL2-associated athanogene 5 [Source:MGI Symbol;Acc:MGI:1917619]
Mettl20	ENSMUSG00000039958.14	640.41	781.759	710.792	763.797	920.499	903.067	896.27	-0.312249	0.00334984	0.0864783	methyltransferase like 20 [Source:MGI Symbol;Acc:MGI:2443575]
Tnfaip8	ENSMUSG00000062210.10	2687.47	2851.87	2547.62	2574.35	2238.46	2331.75	2055.11	0.256437	0.00336665	0.086678	tumor necrosis factor, alpha-induced protein 8 [Source:MGI Symbol;Acc:MGI:2147191]
Gzmm	ENSMUSG00000054206.2	242.456	259.614	209.742	218.652	168.02	161.19	138.245	0.489723	0.00337715	0.086678	granzyme M (lymphocyte met-ase 1) [Source:MGI Symbol;Acc:MGI:99549]
Cacul1	ENSMUSG00000033417.12	2721.23	2506.69	2663.09	2499.16	2149.03	2328.75	2193.36	0.213145	0.00337992	0.086678	CDK2 associated, cullin domain 1 [Source:MGI Symbol;Acc:MGI:1926082]
Gm18852	ENSMUSG00000099241.1	309.975	299.48	283.893	339.355	242.997	209.247	183.707	0.46503	0.00338602	0.086678	predicted gene, 18852 [Source:MGI Symbol;Acc:MGI:5011037]
Siae	ENSMUSG00000001942.7	689.515	853.712	972.44	780.616	1068.65	1144.35	1042.86	-0.373193	0.00343119	0.0874598	sialic acid acetylesterase [Source:MGI Symbol;Acc:MGI:104803]
Fam132b	ENSMUSG00000047443.11	35.8057	30.1425	26.4826	36.6068	78.5902	100.118	47.3186	-0.689515	0.00343341	NA	family with sequence similarity 132, member B [Source:MGI Symbol;Acc:MGI:3606476]
Rps4x	ENSMUSG00000031320.9	5578.53	6273.52	5783.79	6012.43	6557.31	6684.9	7465.2	-0.222604	0.00343588	0.0874598	ribosomal protein S4, X-linked [Source:MGI Symbol;Acc:MGI:98158]
Tars2	ENSMUSG00000028107.11	1393.35	1182.36	1509.51	1317.85	1609.74	1631.93	1772.13	-0.298526	0.00344382	0.0874598	threonyl-tRNA synthetase 2, mitochondrial (putative) [Source:MGI Symbol;Acc:MGI:1919057]
Rsl1d1	ENSMUSG00000005846.11	11091.6	9868.25	9974.4	10338	8204.99	9335.03	8611.06	0.231152	0.00345092	0.0874598	ribosomal L1 domain containing 1 [Source:MGI Symbol;Acc:MGI:1913659]
Ddx3x	ENSMUSG00000000787.9	19078.3	15938.6	18602.4	16752.1	13834.6	14267.9	15748.7	0.252742	0.00345245	0.0874598	DEAD/H (Asp-Glu-Ala-Asp/His) box polypeptide 3, X-linked [Source:MGI Symbol;Acc:MGI:103064]
Micall2	ENSMUSG00000036718.14	0	3.88935	14.8302	5.93625	52.3934	25.0296	80.72	-0.550426	0.00347326	NA	MICAL-like 2 [Source:MGI Symbol;Acc:MGI:2444818]
Cenph	ENSMUSG00000045273.8	92.0718	64.1743	38.1349	51.4475	166.214	113.134	126.183	-0.680788	0.00348285	0.0880467	centromere protein H [Source:MGI Symbol;Acc:MGI:1349448]
F2rl1	ENSMUSG00000021678.8	8.18416	20.4191	33.8977	21.7662	70.4601	45.0532	76.0809	-0.685263	0.00348777	NA	coagulation factor II (thrombin) receptor-like 1 [Source:MGI Symbol;Acc:MGI:101910]
Cnnm3	ENSMUSG00000001138.10	1286.96	799.261	2188.52	792.489	2852.73	2316.74	2156.24	-0.649525	0.00349058	0.0880532	cyclin M3 [Source:MGI Symbol;Acc:MGI:2151055]
Clec1b	ENSMUSG00000030159.12	65.4733	56.3956	140.887	78.1606	20.7767	9.01065	40.8239	0.676884	0.00349931	NA	C-type lectin domain family 1, member b [Source:MGI Symbol;Acc:MGI:1913287]
Cdca5	ENSMUSG00000024791.7	32.7366	87.5104	129.235	114.767	168.02	233.276	280.2	-0.692275	0.0035129	0.0880532	cell division cycle associated 5 [Source:MGI Symbol;Acc:MGI:1915099]
Cd84	ENSMUSG00000038147.10	10747.8	9784.63	9353.65	11543	12461.5	12482.7	12479.1	-0.263095	0.00351709	0.0880532	CD84 antigen [Source:MGI Symbol;Acc:MGI:1336885]
Pllp	ENSMUSG00000031775.4	158.568	422.967	1269.05	555.039	230.35	165.195	167.007	0.686324	0.00351924	0.0880532	plasma membrane proteolipid [Source:MGI Symbol;Acc:MGI:1915051]
Knstrn	ENSMUSG00000027331.12	270.077	242.112	181.141	196.885	338.751	334.395	336.797	-0.50577	0.00351924	0.0880532	kinetochore-localized astrin/SPAG5 binding [Source:MGI Symbol;Acc:MGI:1289298]
Gypc	ENSMUSG00000090523.2	1139.64	1507.12	1335.78	1348.52	1541.99	1741.06	1882.54	-0.349232	0.00354427	0.0884977	glycophorin C [Source:MGI Symbol;Acc:MGI:1098566]
Ppp1r14b	ENSMUSG00000056612.6	1163.17	1154.16	1229.85	1069.51	1457.08	1285.52	1428.84	-0.264754	0.00358427	0.0893134	protein phosphatase 1, regulatory (inhibitor) subunit 14B [Source:MGI Symbol;Acc:MGI:107682]
mt-Rnr1	ENSMUSG00000064337.1	10868.6	9562.94	13460.6	8786.63	12028.8	14624.3	22506.9	-0.518865	0.00360275	0.0895909	mitochondrially encoded 12S rRNA [Source:MGI Symbol;Acc:MGI:102493]
Taf7	ENSMUSG00000051316.8	3015.86	2638.92	3008.42	2706.93	2084.9	2562.03	2189.64	0.297522	0.00361239	0.0896475	TAF7 RNA polymerase II, TATA box binding protein (TBP)-associated factor [Source:MGI Symbol;Acc:MGI:1346348]
Abt1	ENSMUSG00000036376.2	3212.28	3137.73	2780.67	2843.46	2158.97	2656.14	2333.46	0.307388	0.00365093	0.0900898	activator of basal transcription 1 [Source:MGI Symbol;Acc:MGI:1353636]
Ifi202b	ENSMUSG00000026535.9	31.7136	60.2849	116.523	57.3837	243.9	104.123	185.563	-0.689161	0.00365191	0.0900898	interferon activated gene 202B [Source:MGI Symbol;Acc:MGI:1347083]
E2f2	ENSMUSG00000018983.9	1802.56	2056.49	1532.81	1702.71	2411	2198.6	2235.11	-0.343477	0.00365239	0.0900898	E2F transcription factor 2 [Source:MGI Symbol;Acc:MGI:1096341]
Slfn4	ENSMUSG00000000204.12	4.09208	22.3638	54.0245	62.3306	272.807	107.127	1289.66	-0.498019	0.00367041	0.0903514	schlafen 4 [Source:MGI Symbol;Acc:MGI:1329010]
Socs6	ENSMUSG00000056153.11	2185.17	2170.26	2425.8	2256.76	1917.78	2019.39	1876.04	0.210019	0.00368257	0.0904681	suppressor of cytokine signaling 6 [Source:MGI Symbol;Acc:MGI:1924885]
Gm9581	ENSMUSG00000091562.3	136.062	96.2614	305.079	138.512	48.7801	49.058	90.9259	0.688635	0.00371186	0.091004	predicted gene 9581 [Source:MGI Symbol;Acc:MGI:3779989]
Snai3	ENSMUSG00000006587.5	203.581	262.531	236.225	205.79	302.617	372.44	309.89	-0.466598	0.00373694	0.0913104	snail family zinc finger 3 [Source:MGI Symbol;Acc:MGI:1353563]
Rab29	ENSMUSG00000026433.10	1020.97	1232.92	1105.91	1288.17	1506.76	1500.77	1388.01	-0.320634	0.00373934	0.0913104	RAB29, member RAS oncogene family [Source:MGI Symbol;Acc:MGI:2385107]
Abca1	ENSMUSG00000015243.4	2180.05	1934.95	1773.27	1989.63	1200.53	1375.63	1756.35	0.402097	0.00377153	0.0918022	ATP-binding cassette, sub-family A (ABC1), member 1 [Source:MGI Symbol;Acc:MGI:99607]
Ptms	ENSMUSG00000030122.10	1525.32	1781.32	1805.05	1623.56	2091.22	2309.73	1888.1	-0.306079	0.00378133	0.0918022	parathymosin [Source:MGI Symbol;Acc:MGI:1916452]
Slc2a10	ENSMUSG00000027661.4	1805.63	1943.7	1568.83	1924.33	2513.08	2277.69	2119.13	-0.330605	0.00378589	0.0918022	solute carrier family 2 (facilitated glucose transporter), member 10 [Source:MGI Symbol;Acc:MGI:2156687]
Sgol1	ENSMUSG00000023940.11	10.2302	40.8382	54.0245	70.2456	137.307	90.1065	218.037	-0.665467	0.00379555	0.0918022	shugoshin-like 1 (S. pombe) [Source:MGI Symbol;Acc:MGI:1919665]
Fam171a1	ENSMUSG00000050530.11	272.123	722.447	1864.37	710.371	351.397	200.237	358.137	0.684913	0.00379715	0.0918022	family with sequence similarity 171, member A1 [Source:MGI Symbol;Acc:MGI:2442917]
Stap1	ENSMUSG00000029254.13	1153.97	975.254	978.796	1125.91	1269.19	1281.51	1491.93	-0.331	0.00383321	0.0923216	signal transducing adaptor family member 1 [Source:MGI Symbol;Acc:MGI:1926193]
Dusp7	ENSMUSG00000053716.9	4770.34	5340.08	6133.36	5195.2	4718.12	4173.93	3742.81	0.320235	0.00384227	0.0923216	dual specificity phosphatase 7 [Source:MGI Symbol;Acc:MGI:2387100]
Smad7	ENSMUSG00000025880.8	8012.29	5830.13	8474.42	5957.02	4680.18	5264.22	5551.12	0.403313	0.00384341	0.0923216	SMAD family member 7 [Source:MGI Symbol;Acc:MGI:1100518]
Acot9	ENSMUSG00000025287.12	4538.11	4672.08	4643.98	5096.27	5295.35	5758.8	5360.92	-0.208498	0.00384894	0.0923216	acyl-CoA thioesterase 9 [Source:MGI Symbol;Acc:MGI:1928939]
Rplp1	ENSMUSG00000007892.7	2506.4	2728.38	2547.62	2282.49	2872.61	3012.56	3047.87	-0.240552	0.00386277	0.0924712	ribosomal protein, large, P1 [Source:MGI Symbol;Acc:MGI:1927099]
Hmbox1	ENSMUSG00000021972.11	1504.86	1410.86	1808.23	1616.64	1273.7	1252.48	1306.36	0.289819	0.00388817	0.0928967	homeobox containing 1 [Source:MGI Symbol;Acc:MGI:2445066]
Gm37893	ENSMUSG00000103928.1	67.5193	27.2254	44.4907	56.3943	97.5602	107.127	112.266	-0.67122	0.00390782	NA	NA
Ssbp3	ENSMUSG00000061887.11	3279.8	3439.16	2963.93	3392.56	3786.78	4040.77	3810.54	-0.243692	0.00392043	0.093395	single-stranded DNA binding protein 3 [Source:MGI Symbol;Acc:MGI:1919725]
Trak1	ENSMUSG00000032536.9	5346.3	5257.43	5173.64	5186.3	4692.83	4589.42	4807.94	0.150758	0.00393001	0.093395	trafficking protein, kinesin binding 1 [Source:MGI Symbol;Acc:MGI:1914345]
Rps3a1	ENSMUSG00000028081.6	7812.8	8684.92	8087.78	7900.15	8989.09	9024.66	9763.4	-0.190698	0.00393202	0.093395	ribosomal protein S3A1 [Source:MGI Symbol;Acc:MGI:1202063]
Cenpm	ENSMUSG00000068101.7	24.5525	41.8105	25.4233	30.6706	64.1368	57.0674	78.8643	-0.671476	0.00395901	NA	centromere protein M [Source:MGI Symbol;Acc:MGI:1913820]
Arsj	ENSMUSG00000046561.9	62.4042	146.823	334.74	78.1606	60.5235	18.0213	24.1232	0.643078	0.0039796	0.0943414	arylsulfatase J [Source:MGI Symbol;Acc:MGI:2443513]
Gpx1	ENSMUSG00000063856.7	3527.37	4515.53	5249.91	4511.55	6711.78	4787.66	7177.58	-0.434866	0.00403477	0.095309	glutathione peroxidase 1 [Source:MGI Symbol;Acc:MGI:104887]
Ddx51	ENSMUSG00000029504.5	2064.45	2017.6	2109.07	2133.09	1803.96	1871.21	1771.2	0.187443	0.00403607	0.095309	DEAD (Asp-Glu-Ala-Asp) box polypeptide 51 [Source:MGI Symbol;Acc:MGI:1916913]
Dhfr	ENSMUSG00000021707.4	291.561	276.144	327.325	350.238	432.698	413.488	403.6	-0.388994	0.00405251	0.0955122	dihydrofolate reductase [Source:MGI Symbol;Acc:MGI:94890]
3110001I22Rik	ENSMUSG00000079737.3	443.991	408.382	472.449	567.901	375.787	286.338	314.529	0.461697	0.00412106	0.0969404	RIKEN cDNA 3110001I22 gene [Source:MGI Symbol;Acc:MGI:1913848]
Alox15	ENSMUSG00000018924.6	18.4144	27.2254	70.9733	33.6387	136.404	63.0745	134.533	-0.672125	0.00415318	NA	arachidonate 15-lipoxygenase [Source:MGI Symbol;Acc:MGI:87997]
Ube2l3	ENSMUSG00000038965.12	4070.59	4508.73	4422.59	4437.34	5022.54	4991.9	4792.17	-0.181681	0.00415422	0.097511	ubiquitin-conjugating enzyme E2L 3 [Source:MGI Symbol;Acc:MGI:109240]
Naa16	ENSMUSG00000022020.11	3275.71	3280.67	3573.03	3251.08	2857.25	2879.4	3067.36	0.179423	0.00416132	0.097511	N(alpha)-acetyltransferase 16, NatA auxiliary subunit [Source:MGI Symbol;Acc:MGI:1914147]
Hmcn2	ENSMUSG00000055632.14	13.2993	24.3084	23.3047	19.7875	32.5201	49.058	102.06	-0.669549	0.00421829	NA	hemicentin 2 [Source:MGI Symbol;Acc:MGI:2677838]
Col8a2	ENSMUSG00000056174.8	1889.52	1779.38	1509.51	1911.47	1315.26	1471.74	1370.38	0.32882	0.00423267	0.0988288	collagen, type VIII, alpha 2 [Source:MGI Symbol;Acc:MGI:88464]
Nme7	ENSMUSG00000026575.12	391.817	463.805	399.357	435.325	606.138	645.763	487.103	-0.413926	0.00423378	0.0988288	NME/NM23 family member 7 [Source:MGI Symbol;Acc:MGI:2449121]
C030037D09Rik	ENSMUSG00000087574.1	188.236	179.882	208.683	212.715	149.954	119.141	128.966	0.481316	0.0042539	0.0991086	RIKEN cDNA C030037D09 gene [Source:MGI Symbol;Acc:MGI:1924865]
Jmjd6	ENSMUSG00000056962.8	5279.8	5476.2	6049.68	5712.65	4443.51	5198.14	4506.4	0.240735	0.00427935	0.0994023	jumonji domain containing 6 [Source:MGI Symbol;Acc:MGI:1858910]
Mmp9	ENSMUSG00000017737.2	21.4834	42.7828	115.464	126.64	377.594	119.141	1329.56	-0.537501	0.00428282	0.0994023	matrix metallopeptidase 9 [Source:MGI Symbol;Acc:MGI:97011]
Pwp2	ENSMUSG00000032834.10	2515.61	2302.49	2354.83	2485.31	2203.23	1837.17	1850.99	0.279044	0.00430584	0.0994905	PWP2 periodic tryptophan protein homolog (yeast) [Source:MGI Symbol;Acc:MGI:1341200]
Slc22a13b-ps	ENSMUSG00000092212.3	6.13812	12.6404	16.9488	12.8619	76.7835	43.0509	19.4841	-0.637205	0.0043093	NA	solute carrier family 22 (organic cation transporter), member 13b, pseudogene [Source:MGI Symbol;Acc:MGI:1924762]
Scube1	ENSMUSG00000016763.11	83.8876	382.129	1026.46	405.643	117.434	92.1088	162.368	0.653201	0.00431009	0.0994905	signal peptide, CUB domain, EGF-like 1 [Source:MGI Symbol;Acc:MGI:1890616]
Ythdf1	ENSMUSG00000038848.11	7515.1	7367.4	8074.01	7326.32	6925.87	6635.84	6404.71	0.176212	0.00431112	0.0994905	YTH domain family 1 [Source:MGI Symbol;Acc:MGI:1917431]
B430306N03Rik	ENSMUSG00000043740.11	2.04604	0	23.3047	7.91499	124.66	24.0284	205.975	-0.489497	0.00432365	NA	RIKEN cDNA B430306N03 gene [Source:MGI Symbol;Acc:MGI:2443478]
C130074G19Rik	ENSMUSG00000039349.5	34.7827	132.238	229.869	83.1074	43.3601	20.0237	27.8345	0.649239	0.00436556	0.100556	RIKEN cDNA C130074G19 gene [Source:MGI Symbol;Acc:MGI:2444831]
Tmem186	ENSMUSG00000043140.9	862.406	830.376	831.553	962.661	660.338	630.745	758.025	0.325375	0.00439419	0.101025	transmembrane protein 186 [Source:MGI Symbol;Acc:MGI:1913940]
Zfp101	ENSMUSG00000055240.13	678.262	682.581	659.946	578.784	489.608	470.556	550.195	0.33838	0.00442953	0.101351	zinc finger protein 101 [Source:MGI Symbol;Acc:MGI:107547]
Dnah17	ENSMUSG00000033987.12	160.614	129.321	98.5152	106.852	56.9101	80.0946	61.2358	0.622771	0.00444436	0.101351	dynein, axonemal, heavy chain 17 [Source:MGI Symbol;Acc:MGI:1917176]
Retnlg	ENSMUSG00000022651.5	0	1.94467	12.7116	17.8087	90.3335	14.0166	477.825	-0.462781	0.00444455	0.101351	resistin like gamma [Source:MGI Symbol;Acc:MGI:2667763]
Cox6c	ENSMUSG00000014313.11	1894.63	1999.13	2055.05	2017.33	2474.23	2406.84	2149.75	-0.233909	0.00446868	0.101351	cytochrome c oxidase subunit VIc [Source:MGI Symbol;Acc:MGI:104614]
Nhlrc2	ENSMUSG00000025078.8	3418.93	4407.6	5060.29	3849.65	3129.15	3188.77	3286.32	0.350901	0.0044856	0.101351	NHL repeat containing 2 [Source:MGI Symbol;Acc:MGI:1914116]
2810468N07Rik	ENSMUSG00000091475.2	404.093	420.05	328.384	358.153	568.198	676.8	440.712	-0.488617	0.00449786	0.101351	RIKEN cDNA 2810468N07 gene [Source:MGI Symbol;Acc:MGI:1920084]
Traf1	ENSMUSG00000026875.11	7484.41	6944.43	5973.41	7269.92	8177.89	8843.45	8337.35	-0.280308	0.00450267	0.101351	TNF receptor-associated factor 1 [Source:MGI Symbol;Acc:MGI:101836]
Ado	ENSMUSG00000057134.4	974.938	1109.44	1098.5	1085.34	1409.2	1227.45	1254.41	-0.275525	0.00451226	0.101351	2-aminoethanethiol (cysteamine) dioxygenase [Source:MGI Symbol;Acc:MGI:2685083]
Bcl9l	ENSMUSG00000063382.5	2988.24	2907.29	2173.69	2624.81	2184.26	1892.24	1981.81	0.36811	0.00452101	0.101351	B cell CLL/lymphoma 9-like [Source:MGI Symbol;Acc:MGI:1933114]
Fbxo5	ENSMUSG00000019773.7	637.341	615.489	566.727	744.999	796.742	843.997	860.085	-0.354598	0.00452414	0.101351	F-box protein 5 [Source:MGI Symbol;Acc:MGI:1914391]
Mbnl3	ENSMUSG00000036109.14	561.638	472.556	513.762	555.039	663.048	624.738	801.633	-0.375885	0.00452723	0.101351	muscleblind-like 3 (Drosophila) [Source:MGI Symbol;Acc:MGI:2444912]
Slc38a2	ENSMUSG00000022462.6	20419.5	16416.9	18431.9	20103.1	15705.4	14945.7	16077.2	0.258967	0.00452944	0.101351	solute carrier family 38, member 2 [Source:MGI Symbol;Acc:MGI:1915010]
Acadsb	ENSMUSG00000030861.11	2403.07	2149.84	3221.34	2291.39	1962.95	1837.17	1813.88	0.381863	0.00453338	0.101351	acyl-Coenzyme A dehydrogenase, short/branched chain [Source:MGI Symbol;Acc:MGI:1914135]
Arl5c	ENSMUSG00000038352.12	942.201	1039.43	809.308	1061.6	1169.82	1220.44	1754.5	-0.454917	0.00454071	0.101351	ADP-ribosylation factor-like 5C [Source:MGI Symbol;Acc:MGI:3028577]
Mctp2	ENSMUSG00000032776.8	7560.11	5201.03	5275.33	6199.42	4821.1	4216.98	4421.04	0.389525	0.00454449	0.101351	multiple C2 domains, transmembrane 2 [Source:MGI Symbol;Acc:MGI:2685335]
Brd8	ENSMUSG00000003778.11	7913.06	7490.89	7066.61	7693.37	6606.09	6410.57	6643.16	0.193283	0.00455425	0.101351	bromodomain containing 8 [Source:MGI Symbol;Acc:MGI:1925906]
Rpl7	ENSMUSG00000043716.10	10922.8	11962.7	11300.6	10861.3	12176.1	13035.4	12856.7	-0.174768	0.00455552	0.101351	ribosomal protein L7 [Source:MGI Symbol;Acc:MGI:98073]
Rpsa	ENSMUSG00000032518.5	12236.3	13711.9	12486	12141.6	13945.7	14270.9	15591.9	-0.207833	0.00455811	0.101351	ribosomal protein SA [Source:MGI Symbol;Acc:MGI:105381]
Tubb5	ENSMUSG00000001525.10	13496.7	15782	15211.6	13054.8	17164.3	17552.7	16353.7	-0.241015	0.00457333	0.101505	tubulin, beta 5 class I [Source:MGI Symbol;Acc:MGI:107812]
Rrp1b	ENSMUSG00000058392.9	1114.07	1136.66	1326.25	1240.68	1497.73	1365.61	1484.5	-0.263087	0.00461011	0.102089	ribosomal RNA processing 1 homolog B (S. cerevisiae) [Source:MGI Symbol;Acc:MGI:1919712]
Ly6c2	ENSMUSG00000022584.11	9007.69	9675.73	7347.33	9782.93	7416.38	6715.93	4576.91	0.449503	0.00461644	0.102089	lymphocyte antigen 6 complex, locus C2 [Source:MGI Symbol;Acc:MGI:3712069]
Slc30a1	ENSMUSG00000037434.7	1700.26	1782.29	1889.8	1603.78	1551.03	1301.54	1110.6	0.362192	0.00463253	0.10226	solute carrier family 30 (zinc transporter), member 1 [Source:MGI Symbol;Acc:MGI:1345281]
Prok2	ENSMUSG00000030069.12	0	5.83402	4.23721	1.97875	34.3267	4.00473	226.387	-0.45349	0.00463389	NA	prokineticin 2 [Source:MGI Symbol;Acc:MGI:1354178]
Ranbp6	ENSMUSG00000074909.4	2321.23	1808.55	2127.08	1985.67	1677.49	1700.01	1541.1	0.305882	0.0046455	0.102361	RAN binding protein 6 [Source:MGI Symbol;Acc:MGI:2683212]
Utp14b	ENSMUSG00000079470.5	289.515	275.171	186.437	243.386	165.31	163.193	137.317	0.53855	0.00468446	0.102906	UTP14, U3 small nucleolar ribonucleoprotein, homolog B (yeast) [Source:MGI Symbol;Acc:MGI:2445092]
Ackr4	ENSMUSG00000079355.3	75.7035	91.3997	302.961	121.693	59.6201	32.0378	51.0299	0.664543	0.00468712	0.102906	atypical chemokine receptor 4 [Source:MGI Symbol;Acc:MGI:2181676]
Nfe2l2	ENSMUSG00000015839.6	5888.5	5394.53	7191.61	5814.55	4994.54	4918.81	4884.95	0.27911	0.0046985	0.10296	nuclear factor, erythroid derived 2, like 2 [Source:MGI Symbol;Acc:MGI:108420]
4933421O10Rik	ENSMUSG00000085037.1	809.209	526.034	537.067	360.132	326.104	319.377	329.375	0.580651	0.00470652	0.10296	RIKEN cDNA 4933421O10 gene [Source:MGI Symbol;Acc:MGI:1918323]
Rbm38	ENSMUSG00000027510.14	718.16	747.727	677.954	815.244	911.465	938.108	898.125	-0.296889	0.00471508	0.102963	RNA binding motif protein 38 [Source:MGI Symbol;Acc:MGI:1889294]
Rin1	ENSMUSG00000024883.6	29.6676	9.72337	40.2535	9.89374	85.8168	45.0532	111.338	-0.636244	0.0047417	NA	Ras and Rab interactor 1 [Source:MGI Symbol;Acc:MGI:2385695]
Tyms	ENSMUSG00000025747.9	292.584	364.626	474.568	342.323	587.168	448.53	642.976	-0.50575	0.00480471	0.104732	thymidylate synthase [Source:MGI Symbol;Acc:MGI:98878]
Clec10a	ENSMUSG00000000318.13	2.04604	7.7787	16.9488	9.89374	35.2301	20.0237	90.9259	-0.577455	0.00483336	NA	C-type lectin domain family 10, member A [Source:MGI Symbol;Acc:MGI:96975]
S100a8	ENSMUSG00000056054.9	2.04604	15.5574	57.2024	41.5537	700.085	108.128	2613.66	-0.441337	0.00484059	0.105326	S100 calcium binding protein A8 (calgranulin A) [Source:MGI Symbol;Acc:MGI:88244]
Il6	ENSMUSG00000025746.8	54.22	50.5615	152.54	104.874	163.504	196.232	290.406	-0.667709	0.0048579	0.105514	interleukin 6 [Source:MGI Symbol;Acc:MGI:96559]
Trbc2	ENSMUSG00000076498.2	5116.12	5170.89	4595.26	4942.91	5245.67	6312.46	6622.75	-0.280886	0.00487843	0.105772	T cell receptor beta, constant 2 [Source:MGI Symbol;Acc:MGI:4835227]
Trbj1-2	ENSMUSG00000076484.1	2918.67	2702.13	2251.02	2537.74	3110.18	3632.29	3167.56	-0.326245	0.00494224	0.106965	T cell receptor beta joining 1-2 [Source:MGI Symbol;Acc:MGI:4439569]
Rrm2b	ENSMUSG00000022292.12	2019.44	1860.08	1871.79	2253.79	1626	1674.98	1308.22	0.347733	0.00496438	0.107254	ribonucleotide reductase M2 B (TP53 inducible) [Source:MGI Symbol;Acc:MGI:2155865]
Pag1	ENSMUSG00000027508.12	3726.86	2861.59	2706.52	2722.76	1998.18	2330.75	2402.11	0.379963	0.00503746	0.108445	phosphoprotein associated with glycosphingolipid microdomains 1 [Source:MGI Symbol;Acc:MGI:2443160]
Sertad1	ENSMUSG00000008384.8	4128.91	4642.91	3755.23	4179.12	3433.58	3540.18	2741.69	0.336497	0.00504545	0.108445	SERTA domain containing 1 [Source:MGI Symbol;Acc:MGI:1913438]
Frmd8	ENSMUSG00000024816.9	8211.78	9103.02	8248.79	8549.18	9496.76	9956.76	9556.5	-0.183178	0.00505378	0.108445	FERM domain containing 8 [Source:MGI Symbol;Acc:MGI:1914707]
Rbsn	ENSMUSG00000014550.11	2564.71	2245.13	2501.01	2273.58	2097.54	2012.38	1856.56	0.25252	0.00505801	0.108445	zinc finger, FYVE domain containing 20 [Source:MGI Symbol;Acc:MGI:1925537]
Slc28a2	ENSMUSG00000027219.10	2786.71	2688.51	2410.97	3073.99	3543.78	3181.76	3406.01	-0.29104	0.00506405	0.108445	solute carrier family 28 (sodium-coupled nucleoside transporter), member 2 [Source:MGI Symbol;Acc:MGI:1913105]
Cry1	ENSMUSG00000020038.9	2852.18	2924.79	2818.81	2838.51	2434.49	2291.71	2649.84	0.206773	0.00511443	0.108918	cryptochrome 1 (photolyase-like) [Source:MGI Symbol;Acc:MGI:1270841]
Crem	ENSMUSG00000063889.13	4415.35	3015.22	3735.1	2927.56	2282.73	2856.37	2442.01	0.420262	0.00511651	0.108918	cAMP responsive element modulator [Source:MGI Symbol;Acc:MGI:88495]
Lysmd3	ENSMUSG00000035840.6	2906.4	2365.7	3147.19	2797.95	2314.34	2303.72	1947.48	0.327486	0.00512134	0.108918	LysM, putative peptidoglycan-binding, domain containing 3 [Source:MGI Symbol;Acc:MGI:1915906]
Per3	ENSMUSG00000028957.9	455.244	430.745	504.228	530.305	407.404	273.323	308.963	0.459331	0.00512185	0.108918	period circadian clock 3 [Source:MGI Symbol;Acc:MGI:1277134]
Oser1	ENSMUSG00000035399.9	4297.71	3431.38	3723.45	3827.89	2797.63	3169.74	3284.47	0.288803	0.00514321	0.109017	oxidative stress responsive serine rich 1 [Source:MGI Symbol;Acc:MGI:1913930]
Trim39	ENSMUSG00000045409.13	3002.56	2742.96	2623.89	2808.83	2344.15	2384.82	2415.1	0.219494	0.00514441	0.109017	tripartite motif-containing 39 [Source:MGI Symbol;Acc:MGI:1890659]
Calca	ENSMUSG00000030669.10	90.0257	74.87	104.871	84.0968	41.5534	53.0627	53.8133	0.596164	0.00515615	NA	calcitonin/calcitonin-related polypeptide, alpha [Source:MGI Symbol;Acc:MGI:2151253]
Ccdc186	ENSMUSG00000035173.11	2609.72	2426.95	2534.91	2606.01	2262.85	2142.53	2258.3	0.186294	0.00520951	0.110205	coiled-coil domain containing 186 [Source:MGI Symbol;Acc:MGI:2445022]
Timmdc1	ENSMUSG00000002846.9	135.039	152.657	166.311	132.576	196.024	211.25	223.604	-0.454684	0.00532504	0.112193	translocase of inner mitochondrial membrane domain containing 1 [Source:MGI Symbol;Acc:MGI:1922139]
Prdx5	ENSMUSG00000024953.13	3303.33	3719.19	3549.72	3268.89	4175.22	3963.68	3881.05	-0.211931	0.00533575	0.112193	peroxiredoxin 5 [Source:MGI Symbol;Acc:MGI:1859821]
Tm2d3	ENSMUSG00000078681.7	1163.17	1195.97	1284.93	1177.36	1513.09	1493.76	1316.57	-0.254372	0.00533978	0.112193	TM2 domain containing 3 [Source:MGI Symbol;Acc:MGI:1915884]
Pprc1	ENSMUSG00000055491.10	2754.99	2629.2	3195.92	3298.57	2613.35	2249.66	2062.53	0.331822	0.00534031	0.112193	peroxisome proliferative activated receptor, gamma, coactivator-related 1 [Source:MGI Symbol;Acc:MGI:2385096]
Coro2b	ENSMUSG00000041729.12	179.028	188.633	751.046	456.102	148.147	73.0863	178.141	0.655118	0.00543527	0.113991	coronin, actin binding protein, 2B [Source:MGI Symbol;Acc:MGI:2444283]
Sirt1	ENSMUSG00000020063.13	3294.12	2524.19	3059.27	2794.98	2297.18	2431.87	2310.26	0.292551	0.00545708	0.114252	sirtuin 1 [Source:MGI Symbol;Acc:MGI:2135607]
Pgk1	ENSMUSG00000062070.9	5295.15	5531.63	5454.35	5275.34	6150.81	6497.68	5750.6	-0.188617	0.00548484	0.114417	phosphoglycerate kinase 1 [Source:MGI Symbol;Acc:MGI:97555]
Klf2	ENSMUSG00000055148.7	236930	200454	182659	184748	133062	182129	140371	0.367025	0.00549035	0.114417	Kruppel-like factor 2 (lung) [Source:MGI Symbol;Acc:MGI:1342772]
Prelid1	ENSMUSG00000021486.6	6990.29	7872.04	7417.24	7374.8	8461.54	8932.55	8072.92	-0.196851	0.00550242	0.114417	PRELI domain containing 1 [Source:MGI Symbol;Acc:MGI:1913744]
Pitpnc1	ENSMUSG00000040430.15	10621	10342.8	10622.7	9911.55	8490.45	9727.49	8676	0.199964	0.00550254	0.114417	phosphatidylinositol transfer protein, cytoplasmic 1 [Source:MGI Symbol;Acc:MGI:1919045]
Nrxn2	ENSMUSG00000033768.13	28.6445	27.2254	65.6768	38.5856	14.4534	14.0166	11.1338	0.652624	0.00551313	NA	neurexin II [Source:MGI Symbol;Acc:MGI:1096362]
Txnip	ENSMUSG00000038393.11	51168.4	66841.4	51169.6	75059.9	44737.7	49230.2	41165.3	0.390887	0.00559476	0.116137	thioredoxin interacting protein [Source:MGI Symbol;Acc:MGI:1889549]
Mmp25	ENSMUSG00000023903.7	10.2302	9.72337	44.4907	11.8725	94.8502	22.026	167.007	-0.5714	0.00560849	NA	matrix metallopeptidase 25 [Source:MGI Symbol;Acc:MGI:2443938]
Npl	ENSMUSG00000042684.8	12.2762	21.3914	31.7791	9.89374	87.6235	30.0355	67.7305	-0.633287	0.00563434	NA	N-acetylneuraminate pyruvate lyase [Source:MGI Symbol;Acc:MGI:1921341]
Ranbp9	ENSMUSG00000038546.8	1755.5	1523.65	2588.94	1551.34	2721.75	3032.58	2347.37	-0.46922	0.00564771	0.117036	RAN binding protein 9 [Source:MGI Symbol;Acc:MGI:1928741]
Ell2	ENSMUSG00000001542.6	1943.74	1687.01	2030.68	1906.52	1551.03	1575.86	1633.88	0.238842	0.00566788	0.117114	elongation factor RNA polymerase II 2 [Source:MGI Symbol;Acc:MGI:2183438]
Ltbp3	ENSMUSG00000024940.10	1241.95	1658.81	2372.84	1738.33	2620.58	2213.62	2903.13	-0.477406	0.0056707	0.117114	latent transforming growth factor beta binding protein 3 [Source:MGI Symbol;Acc:MGI:1101355]
Alox5	ENSMUSG00000025701.9	81.8416	124.459	343.214	154.342	510.384	195.231	774.726	-0.649779	0.00569254	0.117367	arachidonate 5-lipoxygenase [Source:MGI Symbol;Acc:MGI:87999]
Stambpl1	ENSMUSG00000024776.14	1034.27	1059.85	1031.76	1005.2	1144.53	1223.45	1238.63	-0.218059	0.00572971	0.117933	STAM binding protein like 1 [Source:MGI Symbol;Acc:MGI:1923880]
Sigirr	ENSMUSG00000025494.7	4672.13	4908.36	4205.43	5139.8	5569.96	6139.25	5451.84	-0.266789	0.0058158	0.119503	single immunoglobulin and toll-interleukin 1 receptor (TIR) domain [Source:MGI Symbol;Acc:MGI:1344402]
Zfp420	ENSMUSG00000058402.10	822.508	870.242	828.375	874.607	756.995	642.759	619.781	0.308822	0.00587689	0.120555	zinc finger protein 420 [Source:MGI Symbol;Acc:MGI:2444666]
Ctse	ENSMUSG00000004552.13	8061.39	7987.75	6257.3	8147.5	9425.4	9227.9	9742.06	-0.300294	0.00592199	0.121276	cathepsin E [Source:MGI Symbol;Acc:MGI:107361]
Ccdc137	ENSMUSG00000049957.11	2404.1	2361.81	2389.79	2353.72	2134.58	2098.48	2128.41	0.156797	0.00596565	0.121668	coiled-coil domain containing 137 [Source:MGI Symbol;Acc:MGI:1914541]
Kcnn4	ENSMUSG00000054342.7	120.716	151.685	355.926	127.629	359.527	222.263	1015.96	-0.645379	0.00596911	0.121668	potassium intermediate/small conductance calcium-activated channel, subfamily N, member 4 [Source:MGI Symbol;Acc:MGI:1277957]
Impa2	ENSMUSG00000024525.6	180.051	237.25	273.3	135.544	351.397	308.364	373.91	-0.562974	0.00597106	0.121668	inositol (myo)-1(or 4)-monophosphatase 2 [Source:MGI Symbol;Acc:MGI:2149728]
S100a4	ENSMUSG00000001020.8	27.6215	29.1701	23.3047	22.7556	59.6201	54.0639	45.463	-0.637663	0.00597235	NA	S100 calcium binding protein A4 [Source:MGI Symbol;Acc:MGI:1330282]
Rcc2	ENSMUSG00000040945.10	9478.28	9541.55	8918.27	8093.08	10448.9	10471.4	10467.6	-0.215212	0.00604142	0.12284	regulator of chromosome condensation 2 [Source:MGI Symbol;Acc:MGI:1919784]
Cst7	ENSMUSG00000068129.5	7412.8	7827.32	6243.53	7211.55	9805.7	10948.9	7588.6	-0.367747	0.00606239	0.12284	cystatin F (leukocystatin) [Source:MGI Symbol;Acc:MGI:1298217]
Itgav	ENSMUSG00000027087.8	3054.74	2438.62	3173.67	2870.17	3443.51	3501.14	3553.53	-0.272352	0.00606904	0.12284	integrin alpha V [Source:MGI Symbol;Acc:MGI:96608]
Gm5049	ENSMUSG00000102399.1	111.509	116.68	181.141	213.705	266.484	283.335	256.077	-0.579625	0.00607004	0.12284	NA
Fam193a	ENSMUSG00000037210.13	2290.54	1777.43	2448.05	1622.57	2820.21	2764.27	2613.66	-0.389912	0.00607898	0.12284	family with sequence similarity 193, member A [Source:MGI Symbol;Acc:MGI:2447768]
Olfm2	ENSMUSG00000032172.7	64.4502	50.5615	169.488	33.6387	17.1634	21.0248	26.9067	0.625884	0.00612196	NA	olfactomedin 2 [Source:MGI Symbol;Acc:MGI:3045350]
Klc3	ENSMUSG00000040714.10	142.2	152.657	161.014	179.077	214.09	218.258	236.593	-0.433089	0.00614265	0.123732	kinesin light chain 3 [Source:MGI Symbol;Acc:MGI:1277971]
Cenpw	ENSMUSG00000075266.4	152.43	113.763	151.48	126.64	214.994	186.22	204.119	-0.481749	0.0061445	0.123732	centromere protein W [Source:MGI Symbol;Acc:MGI:1913561]
Edil3	ENSMUSG00000034488.11	134.016	236.278	1347.43	336.387	151.76	88.1041	145.667	0.616069	0.00616227	0.123732	EGF-like repeats and discoidin I-like domains 3 [Source:MGI Symbol;Acc:MGI:1329025]
Fam96a	ENSMUSG00000032381.5	4118.68	3996.31	4080.44	4347.31	4959.31	4628.47	4531.45	-0.188365	0.00616375	0.123732	family with sequence similarity 96, member A [Source:MGI Symbol;Acc:MGI:1915500]
Eif2a	ENSMUSG00000027810.11	1430.18	1362.24	1415.23	1391.06	1190.6	1185.4	1260.9	0.196836	0.00618864	0.124019	eukaryotic translation initiation factor 2A [Source:MGI Symbol;Acc:MGI:1098684]
Zfp169	ENSMUSG00000050954.12	897.188	712.723	693.844	605.497	483.284	561.664	520.505	0.418531	0.00619839	0.124019	zinc finger protein 169 [Source:MGI Symbol;Acc:MGI:1915161]
Phospho2	ENSMUSG00000027088.7	2239.39	2007.88	2168.39	2275.56	1757.89	1875.22	1921.51	0.218753	0.00626728	0.125071	phosphatase, orphan 2 [Source:MGI Symbol;Acc:MGI:1920623]
Meis1	ENSMUSG00000020160.15	605.628	731.198	2186.4	916.161	490.511	302.357	645.76	0.645486	0.00627922	0.125071	Meis homeobox 1 [Source:MGI Symbol;Acc:MGI:104717]
Mboat7	ENSMUSG00000035596.11	3694.12	4007.97	3586.8	3554.82	4015.32	4579.41	4459.08	-0.227294	0.00628175	0.125071	membrane bound O-acyltransferase domain containing 7 [Source:MGI Symbol;Acc:MGI:1924832]
Herpud1	ENSMUSG00000031770.12	15179.6	13815	15355.7	13930.4	11882.5	13547	11941	0.213679	0.0062998	0.125225	homocysteine-inducible, endoplasmic reticulum stress-inducible, ubiquitin-like domain member 1 [Source:MGI Symbol;Acc:MGI:1927406]
Trim62	ENSMUSG00000041000.8	2151.41	2374.45	2378.14	2295.35	1974.69	2062.44	1799.96	0.22743	0.00632958	0.125506	tripartite motif-containing 62 [Source:MGI Symbol;Acc:MGI:1914775]
Gm8730	ENSMUSG00000063696.6	4703.84	5132	4908.81	5028	5457.95	5366.34	5874.93	-0.173567	0.00633453	0.125506	predicted pseudogene 8730 [Source:MGI Symbol;Acc:MGI:3644565]
2610203C20Rik	ENSMUSG00000074415.7	1.02302	0.972337	8.47442	17.8087	46.9734	39.0461	64.0193	-0.514666	0.00635092	NA	RIKEN cDNA 2610203C20 gene [Source:MGI Symbol;Acc:MGI:1917705]
Smarcc2	ENSMUSG00000025369.11	12118.7	11377.3	11902.3	12568	10947.5	10235.1	10701.4	0.165573	0.00639299	0.126303	SWI/SNF related, matrix associated, actin dependent regulator of chromatin, subfamily c, member 2 [Source:MGI Symbol;Acc:MGI:1915344]
Rtn3	ENSMUSG00000024758.11	15070.1	14333.2	15303.8	13868.1	16137.2	16219.2	16164.4	-0.147435	0.0063955	0.126303	reticulon 3 [Source:MGI Symbol;Acc:MGI:1339970]
Ppp2r2a	ENSMUSG00000022052.8	9767.79	9663.09	10014.7	10129.2	8555.49	9308	8711.26	0.151453	0.00645597	0.127291	protein phosphatase 2, regulatory subunit B, alpha [Source:MGI Symbol;Acc:MGI:1919228]
Snx15	ENSMUSG00000024787.10	1429.16	1401.14	1453.36	1416.78	1550.12	1793.12	1649.66	-0.222414	0.00648371	0.127632	sorting nexin 15 [Source:MGI Symbol;Acc:MGI:1916274]
C130089K02Rik	ENSMUSG00000104339.1	79.7955	44.7275	148.302	66.2881	30.7134	29.0343	37.1126	0.645671	0.00648449	NA	NA
Rab3d	ENSMUSG00000019066.10	3703.33	4173.27	3823.02	3474.68	4635.92	4561.39	4236.41	-0.236737	0.00651026	0.127881	RAB3D, member RAS oncogene family [Source:MGI Symbol;Acc:MGI:97844]
Kctd15	ENSMUSG00000030499.6	220.972	222.665	182.2	219.641	307.134	333.394	260.716	-0.442308	0.00652157	0.127881	potassium channel tetramerisation domain containing 15 [Source:MGI Symbol;Acc:MGI:2385276]
Nfil3	ENSMUSG00000056749.7	14573.9	11661.2	12001.9	10852.4	8578.97	10790.7	9279.08	0.331434	0.00652788	0.127881	nuclear factor, interleukin 3, regulated [Source:MGI Symbol;Acc:MGI:109495]
Fzd4	ENSMUSG00000049791.3	281.33	501.726	1818.82	658.923	243.9	261.309	371.126	0.642632	0.00655119	0.128079	frizzled homolog 4 (Drosophila) [Source:MGI Symbol;Acc:MGI:108520]
Grasp	ENSMUSG00000000531.4	1465.99	1453.64	2178.99	1264.42	1094.84	1094.29	1152.35	0.43804	0.00656167	0.128079	GRP1 (general receptor for phosphoinositides 1)-associated scaffold protein [Source:MGI Symbol;Acc:MGI:1860303]
Tle1	ENSMUSG00000008305.15	1147.83	1530.46	3019.01	1797.69	1033.42	966.141	1243.27	0.571219	0.00656951	0.128079	transducin-like enhancer of split 1, homolog of Drosophila E(spl) [Source:MGI Symbol;Acc:MGI:104636]
Tcaf2	ENSMUSG00000029851.4	26.5985	41.8105	93.2187	43.5325	16.26	16.0189	17.6285	0.635584	0.00659656	NA	family with sequence similarity 115, member C [Source:MGI Symbol;Acc:MGI:2385258]
Rgs18	ENSMUSG00000026357.3	764.196	940.25	1113.33	904.288	787.708	520.615	629.059	0.446121	0.00660283	0.128523	regulator of G-protein signaling 18 [Source:MGI Symbol;Acc:MGI:1927498]
Srd5a3	ENSMUSG00000029233.12	2744.76	3136.76	2699.1	3002.75	3364.02	3793.48	3291.89	-0.260201	0.00661802	0.128532	steroid 5 alpha-reductase 3 [Source:MGI Symbol;Acc:MGI:1930252]
Taok1	ENSMUSG00000017291.10	4307.94	3980.75	4287	4077.21	3755.16	3708.38	3579.51	0.168466	0.00663758	0.128532	TAO kinase 1 [Source:MGI Symbol;Acc:MGI:1914490]
Ppid	ENSMUSG00000027804.10	7687.99	6045.99	7098.39	7153.18	5933.11	5913.99	5421.23	0.263374	0.00664414	0.128532	peptidylprolyl isomerase D (cyclophilin D) [Source:MGI Symbol;Acc:MGI:1914988]
H2afx	ENSMUSG00000049932.3	2173.92	2340.42	2063.52	2216.2	2515.79	2552.01	2543.14	-0.206078	0.00664546	0.128532	H2A histone family, member X [Source:MGI Symbol;Acc:MGI:102688]
Fcnb	ENSMUSG00000026835.12	0	1.94467	10.593	1.97875	79.4935	4.00473	144.739	-0.432771	0.00672765	NA	ficolin B [Source:MGI Symbol;Acc:MGI:1341158]
Mad2l1	ENSMUSG00000029910.11	923.787	1037.48	1008.46	1072.48	1262.86	1148.36	1208.02	-0.25121	0.00675374	0.130419	MAD2 mitotic arrest deficient-like 1 [Source:MGI Symbol;Acc:MGI:1860374]
Calm3	ENSMUSG00000019370.10	3422	3290.39	3512.65	3315.39	3878.92	3863.56	3634.25	-0.167213	0.00677913	0.130702	calmodulin 3 [Source:MGI Symbol;Acc:MGI:103249]
Lmo4	ENSMUSG00000028266.14	2029.67	2232.49	2474.53	1782.85	2532.05	2837.35	2664.69	-0.315621	0.00681295	0.131086	LIM domain only 4 [Source:MGI Symbol;Acc:MGI:109360]
Pard6g	ENSMUSG00000056214.8	793.863	813.846	1941.7	1007.18	649.498	625.739	636.481	0.58313	0.00682055	0.131086	par-6 family cell polarity regulator gamma [Source:MGI Symbol;Acc:MGI:2135606]
Vav3	ENSMUSG00000033721.13	3319.7	2416.26	2936.39	2897.88	3809.36	3384	3682.5	-0.310724	0.0069018	0.132439	vav 3 oncogene [Source:MGI Symbol;Acc:MGI:1888518]
Polg	ENSMUSG00000039176.14	7539.65	6879.29	6181.03	6378.5	5701.85	5616.64	5564.11	0.246549	0.00692734	0.132719	polymerase (DNA directed), gamma [Source:MGI Symbol;Acc:MGI:1196389]
Taldo1	ENSMUSG00000025503.4	8798.99	9546.41	9807.03	8610.52	10625	10766.7	10000	-0.189397	0.00696886	0.133127	transaldolase 1 [Source:MGI Symbol;Acc:MGI:1274789]
Prkcd	ENSMUSG00000021948.12	8243.49	8527.4	7714.9	8646.14	9446.18	9254.93	9447.95	-0.181284	0.00697044	0.133127	protein kinase C, delta [Source:MGI Symbol;Acc:MGI:97598]
Zfp652	ENSMUSG00000075595.6	3625.58	3200.93	3013.72	3370.8	2762.4	2648.13	2861.38	0.245881	0.00700319	0.133502	zinc finger protein 652 [Source:MGI Symbol;Acc:MGI:2442221]
Arhgap22	ENSMUSG00000063506.10	6.13812	8.75104	24.364	12.8619	62.3301	22.026	56.5967	-0.598556	0.00700339	NA	Rho GTPase activating protein 22 [Source:MGI Symbol;Acc:MGI:2443418]
Bach1	ENSMUSG00000025612.5	946.293	854.684	920.534	1024	747.058	794.939	744.108	0.277228	0.007012	0.133502	BTB and CNC homology 1 [Source:MGI Symbol;Acc:MGI:894680]
Fer	ENSMUSG00000000127.11	1502.82	1331.13	1600.61	1201.1	959.342	1134.34	1163.48	0.341167	0.00710753	0.134994	fer (fms/fps related) protein kinase [Source:MGI Symbol;Acc:MGI:105917]
Gm17173	ENSMUSG00000090709.1	46.0359	52.5062	41.3128	73.2137	108.4	85.1005	104.843	-0.603082	0.00710989	NA	predicted gene 17173 [Source:MGI Symbol;Acc:MGI:4938000]
Camsap2	ENSMUSG00000041570.11	2361.13	2201.37	2690.63	2006.45	1924.1	1704.01	1905.73	0.301576	0.00711252	0.134994	calmodulin regulated spectrin-associated protein family, member 2 [Source:MGI Symbol;Acc:MGI:1922434]
Rnf14	ENSMUSG00000060450.10	8543.24	8117.07	8172.52	8558.09	7528.4	7467.82	7582.11	0.142134	0.00712862	0.135089	ring finger protein 14 [Source:MGI Symbol;Acc:MGI:1929668]
Klhl18	ENSMUSG00000054792.12	1354.48	1281.54	1319.89	1385.12	1186.98	1130.34	1079.98	0.224292	0.00714157	0.135121	kelch-like 18 [Source:MGI Symbol;Acc:MGI:2143315]
Ccdc6	ENSMUSG00000048701.10	1281.84	1216.39	1265.87	1087.32	1392.04	1415.67	1574.5	-0.261869	0.00715248	0.135121	coiled-coil domain containing 6 [Source:MGI Symbol;Acc:MGI:1923801]
Plekhf2	ENSMUSG00000049969.3	3720.72	3702.66	4730.85	4281.02	3392.93	3472.1	3199.11	0.271419	0.00718066	0.135443	pleckstrin homology domain containing, family F (with FYVE domain) member 2 [Source:MGI Symbol;Acc:MGI:1919051]
Qsox2	ENSMUSG00000036327.15	965.731	934.416	1283.88	921.107	705.505	687.813	867.508	0.391821	0.0072172	0.135922	quiescin Q6 sulfhydryl oxidase 2 [Source:MGI Symbol;Acc:MGI:2387194]
Gm14548	ENSMUSG00000074417.9	21.4834	49.5892	98.5152	86.0756	256.547	71.084	262.572	-0.617143	0.00727676	0.136832	predicted gene 14548 [Source:MGI Symbol;Acc:MGI:3709645]
Lpar5	ENSMUSG00000067714.10	172.89	246.001	192.793	208.758	289.067	305.361	280.2	-0.440911	0.00731033	0.137252	lysophosphatidic acid receptor 5 [Source:MGI Symbol;Acc:MGI:2685918]
Loxl4	ENSMUSG00000025185.11	63.4272	27.2254	49.7872	61.3412	145.437	64.0757	147.523	-0.636305	0.00732845	0.13738	lysyl oxidase-like 4 [Source:MGI Symbol;Acc:MGI:1914823]
Junb	ENSMUSG00000052837.5	283830	218190	215210	207553	156203	202484	172200	0.349591	0.00736127	0.137583	jun B proto-oncogene [Source:MGI Symbol;Acc:MGI:96647]
Nf1	ENSMUSG00000020716.12	474.681	492.003	649.353	597.582	384.821	426.504	416.589	0.384252	0.00736187	0.137583	neurofibromatosis 1 [Source:MGI Symbol;Acc:MGI:97306]
Pla1a	ENSMUSG00000002847.6	10.2302	4.86169	9.53373	2.96812	37.0367	10.0118	52.8855	-0.550397	0.00737149	NA	phospholipase A1 member A [Source:MGI Symbol;Acc:MGI:1934677]
Arid3a	ENSMUSG00000019564.9	1083.38	998.59	1113.33	925.065	1345.97	1126.33	1389.87	-0.307531	0.00739112	0.137919	AT rich interactive domain 3A (BRIGHT-like) [Source:MGI Symbol;Acc:MGI:1328360]
Mfsd3	ENSMUSG00000019080.7	197.443	176.965	155.718	181.055	257.451	275.325	225.459	-0.4406	0.00742207	0.138236	major facilitator superfamily domain containing 3 [Source:MGI Symbol;Acc:MGI:1916822]
Hivep2	ENSMUSG00000015501.7	4372.39	3480.97	3434.26	3389.6	4314.33	4581.41	4762.48	-0.297372	0.00743149	0.138236	human immunodeficiency virus type I enhancer binding protein 2 [Source:MGI Symbol;Acc:MGI:1338076]
G0s2	ENSMUSG00000009633.3	606.651	938.305	758.461	615.391	989.152	911.076	1329.56	-0.472434	0.00744217	0.138236	G0/G1 switch gene 2 [Source:MGI Symbol;Acc:MGI:1316737]
Lacc1	ENSMUSG00000044350.11	38.8747	31.1148	74.1512	49.4687	65.0401	102.121	202.264	-0.63287	0.00750617	0.138822	laccase (multicopper oxidoreductase) domain containing 1 [Source:MGI Symbol;Acc:MGI:2445077]
Zfp326	ENSMUSG00000029290.9	979.03	1004.42	989.389	971.565	1145.43	1087.28	1195.03	-0.211985	0.00750644	0.138822	zinc finger protein 326 [Source:MGI Symbol;Acc:MGI:1927246]
Plac8	ENSMUSG00000029322.9	158.568	199.329	531.77	413.558	1208.66	332.393	870.291	-0.633868	0.00750789	0.138822	placenta-specific 8 [Source:MGI Symbol;Acc:MGI:2445289]
Ctsb	ENSMUSG00000021939.7	12757.1	14517	17904.3	15378.8	17936.6	17533.7	21183	-0.305672	0.00758988	0.140121	cathepsin B [Source:MGI Symbol;Acc:MGI:88561]
Mllt11	ENSMUSG00000053192.6	402.047	509.505	415.247	430.378	323.394	353.418	304.323	0.37887	0.00762941	0.140121	myeloid/lymphoid or mixed-lineage leukemia (trithorax homolog, Drosophila); translocated to, 11 [Source:MGI Symbol;Acc:MGI:1929671]
Nlrx1	ENSMUSG00000032109.11	784.656	797.317	759.52	787.542	906.045	884.044	1015.96	-0.252146	0.00763355	0.140121	NLR family member X1 [Source:MGI Symbol;Acc:MGI:2429611]
N4bp2l1	ENSMUSG00000041132.8	990.283	1115.27	1012.69	1137.78	1226.73	1256.48	1690.48	-0.357121	0.00764611	0.140121	NEDD4 binding protein 2-like 1 [Source:MGI Symbol;Acc:MGI:2140872]
Hmcn1	ENSMUSG00000066842.15	156.522	240.167	1062.48	440.272	175.247	140.166	163.296	0.625004	0.00764664	0.140121	hemicentin 1 [Source:MGI Symbol;Acc:MGI:2685047]
Pde9a	ENSMUSG00000041119.8	130.947	428.801	1273.28	529.315	215.897	153.181	206.903	0.622191	0.00764715	0.140121	phosphodiesterase 9A [Source:MGI Symbol;Acc:MGI:1277179]
Pde7a	ENSMUSG00000069094.9	7904.87	7185.57	6776.36	7945.66	6617.83	6192.32	5848.02	0.245701	0.00769114	0.14071	phosphodiesterase 7A [Source:MGI Symbol;Acc:MGI:1202402]
Rpl41	ENSMUSG00000093674.4	2215.86	2370.56	2364.36	2097.47	2623.29	2516.97	2622.93	-0.195269	0.00770236	0.14071	ribosomal protein L41 [Source:MGI Symbol;Acc:MGI:1915195]
Hbp1	ENSMUSG00000002996.14	9992.86	10550.8	11164	11284.8	9188.73	9936.74	8947.85	0.188971	0.00771459	0.140722	high mobility group box transcription factor 1 [Source:MGI Symbol;Acc:MGI:894659]
Il20ra	ENSMUSG00000020007.3	149.361	156.546	115.464	127.629	75.8802	90.1065	35.257	0.617346	0.00772685	0.140735	interleukin 20 receptor, alpha [Source:MGI Symbol;Acc:MGI:3605069]
Trbc1	ENSMUSG00000076490.3	21635.8	22353.1	17127.9	19920.1	23489.4	28351.5	24276.3	-0.308217	0.00779114	0.141694	T cell receptor beta, constant region 1 [Source:MGI Symbol;Acc:MGI:4439726]
Hoxa10	ENSMUSG00000000938.11	24.5525	5.83402	4.23721	5.93625	59.6201	40.0473	31.5457	-0.561473	0.00781883	NA	homeobox A10 [Source:MGI Symbol;Acc:MGI:96171]
Tspyl2	ENSMUSG00000041096.10	2801.03	2649.62	2646.14	2794.98	2339.64	2457.9	2379.85	0.177634	0.00788429	0.143174	TSPY-like 2 [Source:MGI Symbol;Acc:MGI:106244]
Dnajc9	ENSMUSG00000021811.6	4230.19	4427.05	4292.3	4120.74	4523	5166.1	4896.08	-0.189127	0.00791989	0.143607	DnaJ (Hsp40) homolog, subfamily C, member 9 [Source:MGI Symbol;Acc:MGI:1915326]
Taf3	ENSMUSG00000025782.9	2440.92	2611.7	2567.75	2633.71	2190.59	2278.69	2328.82	0.169228	0.00806062	0.145942	TAF3 RNA polymerase II, TATA box binding protein (TBP)-associated factor [Source:MGI Symbol;Acc:MGI:2388097]
Isy1	ENSMUSG00000030056.6	3305.38	3424.57	3173.67	2962.19	3538.36	3957.68	3765.08	-0.220871	0.00808428	0.146153	ISY1 splicing factor homolog (S. cerevisiae) [Source:MGI Symbol;Acc:MGI:1923310]
Nt5dc3	ENSMUSG00000054027.7	434.783	378.239	381.349	373.983	289.067	275.325	327.519	0.35861	0.0081145	0.146482	5'-nucleotidase domain containing 3 [Source:MGI Symbol;Acc:MGI:3513266]
Csnk2a2	ENSMUSG00000046707.8	880.82	492.003	1115.45	483.804	1233.96	1453.72	1152.35	-0.568007	0.00816106	0.147104	casein kinase 2, alpha prime polypeptide [Source:MGI Symbol;Acc:MGI:88547]
Gatsl3	ENSMUSG00000020424.3	1607.16	1704.51	1479.85	1598.83	1371.26	1364.61	1293.37	0.236206	0.00820724	0.147718	GATS protein-like 3 [Source:MGI Symbol;Acc:MGI:1919212]
Pcdh17	ENSMUSG00000035566.6	152.43	453.109	1311.42	497.655	293.584	121.143	156.801	0.612705	0.00823754	0.148045	protocadherin 17 [Source:MGI Symbol;Acc:MGI:2684924]
Slc41a2	ENSMUSG00000034591.5	2909.47	2280.13	2253.14	2169.7	1887.97	1996.36	1624.61	0.350072	0.00829978	0.148944	solute carrier family 41, member 2 [Source:MGI Symbol;Acc:MGI:2442940]
0610011F06Rik	ENSMUSG00000025731.12	858.313	908.163	775.41	787.542	1018.06	1125.33	960.289	-0.299298	0.00842336	0.150939	RIKEN cDNA 0610011F06 gene [Source:MGI Symbol;Acc:MGI:1915597]
Wdfy1	ENSMUSG00000073643.8	3284.92	3303.03	3062.45	3194.69	3561.85	3601.25	3656.52	-0.16939	0.00844163	0.151044	WD repeat and FYVE domain containing 1 [Source:MGI Symbol;Acc:MGI:1916618]
Rrad	ENSMUSG00000031880.6	3129.42	2545.58	2284.92	2394.29	1742.53	1919.27	2235.11	0.358113	0.00845528	0.151067	Ras-related associated with diabetes [Source:MGI Symbol;Acc:MGI:1930943]
Ccr1	ENSMUSG00000025804.4	30.6906	77.787	275.419	174.13	453.474	146.173	913.898	-0.577638	0.00850987	0.151819	chemokine (C-C motif) receptor 1 [Source:MGI Symbol;Acc:MGI:104618]
Itgb3	ENSMUSG00000020689.4	839.899	849.823	1263.75	695.53	1467.02	1045.23	1658.93	-0.495797	0.00852537	0.151874	integrin beta 3 [Source:MGI Symbol;Acc:MGI:96612]
Lurap1l	ENSMUSG00000048706.3	157.545	577.568	1474.55	757.861	251.127	120.142	339.58	0.60872	0.00866836	0.154195	leucine rich adaptor protein 1-like [Source:MGI Symbol;Acc:MGI:106510]
Gm36527	ENSMUSG00000103238.1	84.9106	69.0359	45.55	53.4262	32.5201	26.0308	31.5457	0.614319	0.00868392	NA	NA
Btbd3	ENSMUSG00000062098.8	294.63	556.177	1347.43	664.859	365.851	237.28	348.859	0.620291	0.00868828	0.154325	BTB (POZ) domain containing 3 [Source:MGI Symbol;Acc:MGI:2385155]
Cdkn2aip	ENSMUSG00000038069.5	5164.2	4730.42	4374.92	5189.27	3970.16	4333.12	3774.35	0.256082	0.00871537	0.154472	CDKN2A interacting protein [Source:MGI Symbol;Acc:MGI:1918175]
Tmem51	ENSMUSG00000040616.3	240.41	289.757	259.529	376.952	447.151	439.519	385.971	-0.458128	0.00872195	0.154472	transmembrane protein 51 [Source:MGI Symbol;Acc:MGI:2384874]
Ces2b	ENSMUSG00000050097.6	28.6445	46.6722	154.658	23.745	14.4534	10.0118	14.845	0.561774	0.00873929	NA	carboxyesterase 2B [Source:MGI Symbol;Acc:MGI:2448547]
Rap1gap2	ENSMUSG00000038807.14	17678.8	15551.6	12441.5	13092.4	12273.6	11004	10643.9	0.342542	0.00874358	0.154631	RAP1 GTPase activating protein 2 [Source:MGI Symbol;Acc:MGI:3028623]
Kat2a	ENSMUSG00000020918.11	2686.45	2712.82	2971.35	2821.7	3016.24	3118.68	3295.6	-0.170724	0.00879449	0.155306	K(lysine) acetyltransferase 2A [Source:MGI Symbol;Acc:MGI:1343101]
Ndfip1	ENSMUSG00000024425.3	16447.1	14934.1	15970.1	16731.3	17651.2	19354.9	17595.1	-0.185597	0.00880737	0.155308	Nedd4 family interacting protein 1 [Source:MGI Symbol;Acc:MGI:1929601]
Smim8	ENSMUSG00000028295.11	309.975	365.599	273.3	360.132	535.678	447.529	402.672	-0.432008	0.00883244	0.155525	small integral membrane protein 8 [Source:MGI Symbol;Acc:MGI:1913541]
Gm15470	ENSMUSG00000083500.1	109.463	138.072	137.709	120.704	182.474	185.219	174.429	-0.443249	0.0088696	0.155915	predicted gene 15470 [Source:MGI Symbol;Acc:MGI:3641891]
Gtf2i	ENSMUSG00000060261.12	5669.57	5650.25	6229.76	5789.82	6615.12	6140.25	7096.86	-0.183496	0.0088802	0.155915	general transcription factor II I [Source:MGI Symbol;Acc:MGI:1202722]
Xylt1	ENSMUSG00000030657.8	261.893	178.91	201.268	184.024	239.384	337.399	433.29	-0.534891	0.00890142	0.155923	xylosyltransferase 1 [Source:MGI Symbol;Acc:MGI:2451073]
Trove2	ENSMUSG00000018199.8	998.467	1195	1801.87	1024.99	901.528	694.821	884.208	0.482242	0.00890623	0.155923	TROVE domain family, member 2 [Source:MGI Symbol;Acc:MGI:106652]
Pde1c	ENSMUSG00000004347.13	354.988	293.646	279.656	330.451	192.41	263.311	180.924	0.46726	0.00893157	0.156142	phosphodiesterase 1C [Source:MGI Symbol;Acc:MGI:108413]
Ndufaf1	ENSMUSG00000027305.6	1159.08	1265.98	1230.91	1209.02	1530.25	1503.78	1310.08	-0.24726	0.00899415	0.157011	NADH dehydrogenase (ubiquinone) 1 alpha subcomplex, assembly factor 1 [Source:MGI Symbol;Acc:MGI:1916952]
Nfatc3	ENSMUSG00000031902.9	16175	14639.5	14243.4	14630.9	17255.5	16325.3	17352	-0.186823	0.00901093	0.157079	nuclear factor of activated T cells, cytoplasmic, calcineurin dependent 3 [Source:MGI Symbol;Acc:MGI:103296]
Muc13	ENSMUSG00000022824.9	0	0	22.2454	5.93625	99.3669	46.0544	236.593	-0.411905	0.00907599	NA	mucin 13, epithelial transmembrane [Source:MGI Symbol;Acc:MGI:103190]
Gm10557	ENSMUSG00000073647.3	647.571	605.766	631.345	605.497	512.191	530.627	500.093	0.25754	0.00913827	0.159071	predicted gene 10557 [Source:MGI Symbol;Acc:MGI:3708638]
Eprs	ENSMUSG00000026615.11	9249.12	8510.87	7960.66	8837.09	7463.36	7422.77	7567.26	0.19686	0.00918658	0.159684	glutamyl-prolyl-tRNA synthetase [Source:MGI Symbol;Acc:MGI:97838]
Cops2	ENSMUSG00000027206.10	4236.32	3627.79	4127.04	4067.32	3626.89	3328.93	3334.57	0.213925	0.00921512	0.159943	COP9 (constitutive photomorphogenic) homolog, subunit 2 (Arabidopsis thaliana) [Source:MGI Symbol;Acc:MGI:1330276]
RP23-357D17.3	ENSMUSG00000104973.1	323.274	256.697	298.723	336.387	209.574	226.267	229.17	0.39665	0.00922774	0.159943	NA
Adi1	ENSMUSG00000020629.9	3313.56	3701.69	3625.99	3459.84	3860.85	4001.73	3972.91	-0.165191	0.00929387	0.16086	acireductone dioxygenase 1 [Source:MGI Symbol;Acc:MGI:2144929]
E130012A19Rik	ENSMUSG00000043439.5	548.339	680.636	584.735	674.753	741.638	774.915	849.879	-0.321804	0.00931616	0.160866	RIKEN cDNA E130012A19 gene [Source:MGI Symbol;Acc:MGI:2143991]
Bhlhe40	ENSMUSG00000030103.8	131672	95011.9	100683	96932	71339.1	94577.7	75477.8	0.357221	0.0093206	0.160866	basic helix-loop-helix family, member e40 [Source:MGI Symbol;Acc:MGI:1097714]
Rmi2	ENSMUSG00000037991.9	33.7596	25.2808	33.8977	43.5325	54.2001	62.0733	96.4928	-0.610045	0.00936289	NA	RMI2, RecQ mediated genome instability 2, homolog (S. cerevisiae) [Source:MGI Symbol;Acc:MGI:2685383]
Cdc123	ENSMUSG00000039128.10	2951.41	2838.25	2760.54	2627.78	3174.32	3351.96	3095.19	-0.198801	0.00944668	0.162812	cell division cycle 123 [Source:MGI Symbol;Acc:MGI:2138811]
Nop14	ENSMUSG00000036693.9	1897.7	1981.62	1889.8	2013.38	1711.82	1738.05	1633.88	0.189065	0.00954624	0.164172	NOP14 nucleolar protein [Source:MGI Symbol;Acc:MGI:1922666]
Slc26a2	ENSMUSG00000034320.11	1888.49	1961.2	2110.13	1949.07	1828.35	1513.79	1626.46	0.238929	0.00955256	0.164172	solute carrier family 26 (sulfate transporter), member 2 [Source:MGI Symbol;Acc:MGI:892977]
Dnph1	ENSMUSG00000040658.6	6.13812	1.94467	18.0082	13.8512	55.1034	21.0248	53.8133	-0.538276	0.00955676	NA	2'-deoxynucleoside 5'-phosphate N-hydrolase 1 [Source:MGI Symbol;Acc:MGI:3039376]
Ttpa	ENSMUSG00000073988.10	14.3223	19.4467	54.0245	5.93625	0	2.00237	0.927816	0.461588	0.00956846	NA	tocopherol (alpha) transfer protein [Source:MGI Symbol;Acc:MGI:1354168]
Fer1l5	ENSMUSG00000037432.12	196.42	135.155	217.157	166.215	112.917	110.13	119.688	0.501934	0.00960781	0.164889	fer-1-like 5 (C. elegans) [Source:MGI Symbol;Acc:MGI:3616091]
Myo6	ENSMUSG00000033577.15	3435.3	3296.22	4863.26	4065.34	3125.54	2962.5	3006.12	0.332086	0.00965582	0.16548	myosin VI [Source:MGI Symbol;Acc:MGI:104785]
4430402I18Rik	ENSMUSG00000064202.12	127.877	104.04	124.998	88.0543	58.7168	71.084	71.4418	0.536414	0.00966998	0.16549	RIKEN cDNA 4430402I18 gene [Source:MGI Symbol;Acc:MGI:1918036]
Tipin	ENSMUSG00000032397.6	1668.54	1804.66	1421.58	1803.63	2114.71	1934.29	2178.51	-0.294833	0.00971009	0.165943	timeless interacting protein [Source:MGI Symbol;Acc:MGI:1921571]
Ppp2r4	ENSMUSG00000039515.8	8320.22	8942.59	8194.77	8322.62	9222.15	9250.93	9709.59	-0.156325	0.00972471	0.16596	protein phosphatase 2A activator, regulatory subunit B [Source:MGI Symbol;Acc:MGI:1346006]
Tnfrsf4	ENSMUSG00000029075.6	31.7136	32.0871	77.3291	46.5006	98.4635	48.0568	298.757	-0.584501	0.00979308	0.166893	tumor necrosis factor receptor superfamily, member 4 [Source:MGI Symbol;Acc:MGI:104512]
Fam63a	ENSMUSG00000038712.13	3468.04	3560.7	3937.43	3552.84	3326.98	3038.59	3154.57	0.182801	0.00982007	0.16712	family with sequence similarity 63, member A [Source:MGI Symbol;Acc:MGI:1922257]
Mmp12	ENSMUSG00000049723.11	249.617	101.123	319.91	349.249	91.2369	32.0378	146.595	0.605181	0.00983936	0.167214	matrix metallopeptidase 12 [Source:MGI Symbol;Acc:MGI:97005]
Phlda1	ENSMUSG00000020205.8	767.265	506.588	914.179	621.327	761.512	1337.58	1228.43	-0.514659	0.00986468	0.16722	pleckstrin homology-like domain, family A, member 1 [Source:MGI Symbol;Acc:MGI:1096880]
Stil	ENSMUSG00000028718.13	61.3812	43.7552	27.5419	131.587	152.664	191.226	161.44	-0.609003	0.00986715	0.16722	Scl/Tal1 interrupting locus [Source:MGI Symbol;Acc:MGI:107477]
Smpd1	ENSMUSG00000037049.8	4056.27	4227.72	4048.66	3724.99	3597.08	3494.13	3062.72	0.231081	0.00989055	0.167384	sphingomyelin phosphodiesterase 1, acid lysosomal [Source:MGI Symbol;Acc:MGI:98325]
Ptprcap	ENSMUSG00000045826.8	19783.2	21883.4	15845.1	18451.8	24574.3	27773.8	20990	-0.338458	0.00996483	0.168369	protein tyrosine phosphatase, receptor type, C polypeptide-associated protein [Source:MGI Symbol;Acc:MGI:97811]
Cdk14	ENSMUSG00000028926.12	5257.3	4552.48	5534.86	5378.24	4612.43	4353.14	3704.77	0.272517	0.00997637	0.168369	cyclin-dependent kinase 14 [Source:MGI Symbol;Acc:MGI:894318]
Tnfrsf18	ENSMUSG00000041954.15	2275.2	2769.22	1967.13	2312.17	3102.96	2995.54	2775.1	-0.32218	0.0100418	0.169102	tumor necrosis factor receptor superfamily, member 18 [Source:MGI Symbol;Acc:MGI:894675]
Rasal2	ENSMUSG00000070565.8	390.793	426.856	1145.11	676.732	287.261	267.316	433.29	0.596535	0.0100476	0.169102	RAS protein activator like 2 [Source:MGI Symbol;Acc:MGI:2443881]
Cd160	ENSMUSG00000038304.11	1133.51	1147.36	988.33	1212.97	1325.19	1533.81	1311.93	-0.296117	0.0100822	0.16945	CD160 antigen [Source:MGI Symbol;Acc:MGI:1860383]
Phf3	ENSMUSG00000048874.12	7871.11	6957.07	7050.72	7242.22	6332.38	6277.42	6532.75	0.180856	0.0100961	0.16945	PHD finger protein 3 [Source:MGI Symbol;Acc:MGI:2446126]
Abcb10	ENSMUSG00000031974.8	1919.18	1716.18	2006.32	1941.15	1705.5	1521.8	1579.14	0.227502	0.0101408	0.169809	ATP-binding cassette, sub-family B (MDR/TAP), member 10 [Source:MGI Symbol;Acc:MGI:1860508]
Tril	ENSMUSG00000043496.6	72.6344	210.025	554.016	225.577	74.0735	47.0556	126.183	0.59085	0.0101463	0.169809	TLR4 interactor with leucine-rich repeats [Source:MGI Symbol;Acc:MGI:1914123]
Nptxr	ENSMUSG00000022421.15	9.20718	5.83402	59.321	24.7344	106.594	58.0686	132.678	-0.543148	0.0101532	NA	neuronal pentraxin receptor [Source:MGI Symbol;Acc:MGI:1920590]
C1ql3	ENSMUSG00000049630.6	450.129	357.82	256.351	303.738	228.544	210.248	225.459	0.494303	0.0101593	0.169809	C1q-like 3 [Source:MGI Symbol;Acc:MGI:2387350]
Scp2	ENSMUSG00000028603.12	10526.9	10595.6	11639.6	11218.5	11648.5	12597.9	12265.7	-0.150456	0.0101887	0.170067	sterol carrier protein 2, liver [Source:MGI Symbol;Acc:MGI:98254]
Gm16008	ENSMUSG00000087381.5	46.0359	33.0595	45.55	59.3625	70.4601	81.0958	112.266	-0.590039	0.0101986	NA	predicted gene 16008 [Source:MGI Symbol;Acc:MGI:3802048]
Slc25a29	ENSMUSG00000021265.3	364.195	538.675	461.856	338.366	303.521	295.349	271.85	0.454583	0.0102386	0.170667	solute carrier family 25 (mitochondrial carrier, palmitoylcarnitine transporter), member 29 [Source:MGI Symbol;Acc:MGI:2444911]
Ssh1	ENSMUSG00000042121.13	4924.82	4701.25	4396.11	3880.33	5147.2	5521.52	5390.61	-0.251674	0.0102823	0.170988	slingshot homolog 1 (Drosophila) [Source:MGI Symbol;Acc:MGI:2686240]
Zbtb43	ENSMUSG00000026788.10	1296.17	1244.59	1247.86	1260.46	1074.07	988.167	1150.49	0.223473	0.0103063	0.170988	zinc finger and BTB domain containing 43 [Source:MGI Symbol;Acc:MGI:1919084]
Zfp317	ENSMUSG00000057551.8	1829.16	1490.59	1700.18	1646.32	1432.69	1400.65	1272.96	0.264012	0.0103127	0.170988	zinc finger protein 317 [Source:MGI Symbol;Acc:MGI:107775]
Taf4a	ENSMUSG00000039117.13	1371.87	1265.98	1246.8	1387.1	1562.77	1506.78	1530.9	-0.216562	0.010314	0.170988	TAF4A RNA polymerase II, TATA box binding protein (TBP)-associated factor [Source:MGI Symbol;Acc:MGI:2152346]
4930452B06Rik	ENSMUSG00000021747.11	23.5295	47.6445	119.701	39.575	23.4867	8.00946	7.42252	0.55419	0.0103428	NA	RIKEN cDNA 4930452B06 gene [Source:MGI Symbol;Acc:MGI:1926154]
Abcb9	ENSMUSG00000029408.10	943.224	759.395	937.483	700.477	1004.51	1054.25	1219.15	-0.356422	0.0103603	0.171522	ATP-binding cassette, sub-family B (MDR/TAP), member 9 [Source:MGI Symbol;Acc:MGI:1861729]
Plod2	ENSMUSG00000032374.11	301.791	334.484	469.271	263.174	446.248	508.601	582.668	-0.478341	0.0104305	0.17245	procollagen lysine, 2-oxoglutarate 5-dioxygenase 2 [Source:MGI Symbol;Acc:MGI:1347007]
Tmem65	ENSMUSG00000062373.7	3334.02	2570.86	3919.42	2832.58	2468.81	2172.57	2553.35	0.35535	0.0104462	0.172476	transmembrane protein 65 [Source:MGI Symbol;Acc:MGI:1922118]
Taf1d	ENSMUSG00000031939.12	2271.1	1965.09	1823.06	2208.28	1538.38	1727.04	1744.29	0.285622	0.0104618	0.1725	TATA box binding protein (Tbp)-associated factor, RNA polymerase I, D [Source:MGI Symbol;Acc:MGI:1922566]
Psph	ENSMUSG00000029446.11	1996.93	1975.79	1712.89	1749.21	2139.1	2236.64	2237.89	-0.240584	0.0104917	0.17269	phosphoserine phosphatase [Source:MGI Symbol;Acc:MGI:97788]
Prdm1	ENSMUSG00000038151.9	18034.8	14778.6	13412.9	16837.2	11567.2	14031.6	11558.7	0.318037	0.0105017	0.17269	PR domain containing 1, with ZNF domain [Source:MGI Symbol;Acc:MGI:99655]
9630013D21Rik	ENSMUSG00000059027.11	214.834	174.048	158.895	224.588	280.034	243.287	347.931	-0.478626	0.0105718	0.173609	RIKEN cDNA 9630013D21 gene [Source:MGI Symbol;Acc:MGI:2442649]
Fbxo9	ENSMUSG00000001366.11	5093.61	5634.69	5403.5	5458.38	6082.16	6748.97	5801.63	-0.202597	0.0106649	0.174901	f-box protein 9 [Source:MGI Symbol;Acc:MGI:1918788]
Ms4a6b	ENSMUSG00000024677.10	11954	11409.4	10908.7	12536.4	12639.5	13379.8	14508.3	-0.20565	0.0107273	0.175689	membrane-spanning 4-domains, subfamily A, member 6B [Source:MGI Symbol;Acc:MGI:1917024]
Gm7694	ENSMUSG00000102752.1	988.237	924.693	861.213	1156.58	831.972	573.678	739.469	0.397541	0.0107763	0.176253	NA
Ugdh	ENSMUSG00000029201.11	4695.66	3966.16	4237.21	4306.75	4937.63	5108.03	4836.7	-0.2051	0.0108121	0.176602	UDP-glucose dehydrogenase [Source:MGI Symbol;Acc:MGI:1306785]
Msln	ENSMUSG00000063011.6	2.04604	11.668	126.057	6.92562	274.614	195.231	297.829	-0.460459	0.010861	0.177163	mesothelin [Source:MGI Symbol;Acc:MGI:1888992]
Tgm1	ENSMUSG00000022218.12	4.09208	27.2254	31.7791	13.8512	75.8802	28.0331	121.544	-0.54081	0.0108759	NA	transglutaminase 1, K polypeptide [Source:MGI Symbol;Acc:MGI:98730]
Uap1l1	ENSMUSG00000026956.12	1893.61	2023.43	1803.99	2095.49	2077.67	2487.94	2536.65	-0.266895	0.0108777	0.177199	UDP-N-acteylglucosamine pyrophosphorylase 1-like 1 [Source:MGI Symbol;Acc:MGI:2443318]
Rsad2	ENSMUSG00000020641.12	28.6445	33.0595	44.4907	40.5643	77.6868	31.0367	244.015	-0.571857	0.0109339	NA	radical S-adenosyl methionine domain containing 2 [Source:MGI Symbol;Acc:MGI:1929628]
Hpcal4	ENSMUSG00000046093.6	28.6445	134.183	180.082	128.619	57.8135	18.0213	18.5563	0.565967	0.0110374	0.179561	hippocalcin-like 4 [Source:MGI Symbol;Acc:MGI:2157521]
Trp53bp2	ENSMUSG00000026510.10	3958.06	4041.03	3693.79	4265.19	3518.49	3350.96	3499.72	0.196283	0.011121	0.180679	transformation related protein 53 binding protein 2 [Source:MGI Symbol;Acc:MGI:2138319]
Parp1	ENSMUSG00000026496.8	5335.05	4917.11	5084.65	5113.09	5488.66	5621.64	6182.96	-0.174584	0.0111396	0.180741	poly (ADP-ribose) polymerase family, member 1 [Source:MGI Symbol;Acc:MGI:1340806]
Rb1cc1	ENSMUSG00000025907.11	7837.35	7328.51	8128.03	8467.06	6806.63	6579.77	7377.99	0.187543	0.0111813	0.181175	RB1-inducible coiled-coil 1 [Source:MGI Symbol;Acc:MGI:1341850]
Tmem154	ENSMUSG00000056498.10	247.571	283.922	577.32	439.282	589.878	470.556	1240.49	-0.591544	0.0112249	0.181485	transmembrane protein 154 [Source:MGI Symbol;Acc:MGI:2444725]
Slc7a7	ENSMUSG00000000958.6	524.809	488.113	729.86	595.603	734.411	799.945	788.643	-0.370016	0.0112302	0.181485	solute carrier family 7 (cationic amino acid transporter, y+ system), member 7 [Source:MGI Symbol;Acc:MGI:1337120]
Klra1	ENSMUSG00000079853.4	2942.2	3150.37	2327.29	3328.25	3712.71	4299.08	3455.19	-0.348957	0.0113056	0.182383	killer cell lectin-like receptor, subfamily A, member 1 [Source:MGI Symbol;Acc:MGI:101907]
Clec14a	ENSMUSG00000045930.2	2160.62	7190.43	19309	7981.28	2805.76	1609.9	2776.02	0.560898	0.0113157	0.182383	C-type lectin domain family 14, member a [Source:MGI Symbol;Acc:MGI:1914114]
Grm6	ENSMUSG00000000617.11	4.09208	0	0	0.989374	68.6535	4.00473	29.6901	-0.380475	0.0113752	NA	glutamate receptor, metabotropic 6 [Source:MGI Symbol;Acc:MGI:1351343]
Lgals4	ENSMUSG00000053964.13	447.06	559.094	443.848	501.613	633.238	577.682	669.883	-0.335225	0.0113808	0.18319	lectin, galactose binding, soluble 4 [Source:MGI Symbol;Acc:MGI:107536]
Camk2d	ENSMUSG00000053819.13	6440.93	6339.64	7264.7	7826.94	5930.4	5781.83	6007.61	0.223694	0.0114099	0.18319	calcium/calmodulin-dependent protein kinase II, delta [Source:MGI Symbol;Acc:MGI:1341265]
Dna2	ENSMUSG00000036875.12	193.351	152.657	239.402	179.077	412.824	226.267	290.406	-0.525202	0.011429	0.18319	DNA replication helicase 2 homolog (yeast) [Source:MGI Symbol;Acc:MGI:2443732]
Zbtb16	ENSMUSG00000066687.4	2483.89	2324.86	2198.05	2077.69	1785.89	2049.42	1789.76	0.258101	0.0114328	0.18319	zinc finger and BTB domain containing 16 [Source:MGI Symbol;Acc:MGI:103222]
Zranb1	ENSMUSG00000030967.10	3605.12	3501.39	3253.12	3580.55	2821.12	3166.74	3023.75	0.203272	0.0114409	0.18319	zinc finger, RAN-binding domain containing 1 [Source:MGI Symbol;Acc:MGI:106441]
Vsnl1	ENSMUSG00000054459.6	28.6445	68.0636	361.222	100.916	32.5201	34.0402	25.9788	0.540334	0.0115523	0.184511	visinin-like 1 [Source:MGI Symbol;Acc:MGI:1349453]
Tpd52	ENSMUSG00000027506.12	929.925	1282.51	1782.81	1549.36	2356.8	1445.71	2728.71	-0.506501	0.0115537	0.184511	tumor protein D52 [Source:MGI Symbol;Acc:MGI:107749]
Arl6ip6	ENSMUSG00000026960.6	1990.8	1778.4	1906.75	1778.89	2112	2390.82	2076.45	-0.231351	0.0116486	0.185782	ADP-ribosylation factor-like 6 interacting protein 6 [Source:MGI Symbol;Acc:MGI:1929507]
Lrig3	ENSMUSG00000020105.8	548.339	690.359	671.598	663.87	539.291	486.575	499.165	0.30952	0.0116964	0.186302	leucine-rich repeats and immunoglobulin-like domains 3 [Source:MGI Symbol;Acc:MGI:2443955]
S100a9	ENSMUSG00000056071.9	2.04604	45.6999	144.065	76.1818	1072.26	182.215	4153.83	-0.375539	0.0117292	0.186581	S100 calcium binding protein A9 (calgranulin B) [Source:MGI Symbol;Acc:MGI:1338947]
Kcnc1	ENSMUSG00000058975.6	162.66	94.3167	126.057	91.0224	199.637	148.175	321.952	-0.57817	0.0117467	0.186615	potassium voltage gated channel, Shaw-related subfamily, member 1 [Source:MGI Symbol;Acc:MGI:96667]
Zmynd15	ENSMUSG00000040829.11	59.3351	94.3167	241.521	105.863	46.9734	62.0733	32.4735	0.593455	0.011817	0.187285	zinc finger, MYND-type containing 15 [Source:MGI Symbol;Acc:MGI:3603821]
Baiap2	ENSMUSG00000025372.13	2926.86	2816.86	3176.85	2654.49	3349.57	3524.16	3187.05	-0.212336	0.0118196	0.187285	brain-specific angiogenesis inhibitor 1-associated protein 2 [Source:MGI Symbol;Acc:MGI:2137336]
Eef1g	ENSMUSG00000071644.7	4669.06	5373.14	4979.78	4716.35	5420.01	5702.74	5682.87	-0.184069	0.0118489	0.187506	eukaryotic translation elongation factor 1 gamma [Source:MGI Symbol;Acc:MGI:1914410]
Sh3tc2	ENSMUSG00000045629.7	163.683	377.267	1340.02	384.867	271.904	128.151	157.729	0.581606	0.0118669	0.187546	SH3 domain and tetratricopeptide repeats 2 [Source:MGI Symbol;Acc:MGI:2444417]
Kif14	ENSMUSG00000041498.10	4.09208	19.4467	38.1349	3.9575	46.0701	62.0733	110.41	-0.510774	0.0119064	NA	kinesin family member 14 [Source:MGI Symbol;Acc:MGI:1098226]
Pthlh	ENSMUSG00000048776.6	2.04604	5.83402	31.7791	1.97875	70.4601	88.1041	33.4014	-0.465833	0.0119391	NA	parathyroid hormone-like peptide [Source:MGI Symbol;Acc:MGI:97800]
Faf1	ENSMUSG00000010517.7	6993.36	6988.19	7006.23	6582.31	6118.29	6314.46	6342.55	0.131876	0.0120574	0.190309	Fas-associated factor 1 [Source:MGI Symbol;Acc:MGI:109419]
Suv39h1	ENSMUSG00000039231.15	1585.68	1675.34	1423.7	1481.09	1738.02	1934.29	1824.09	-0.242893	0.0120818	0.190449	suppressor of variegation 3-9 homolog 1 (Drosophila) [Source:MGI Symbol;Acc:MGI:1099440]
Zfp954	ENSMUSG00000062116.8	2469.57	2423.06	2292.33	2380.43	1926.81	2235.64	1827.8	0.243546	0.0121717	0.191618	zinc finger protein 954 [Source:MGI Symbol;Acc:MGI:1917764]
Plekha5	ENSMUSG00000030231.8	5668.55	5306.04	4950.12	5065.6	4588.04	4663.51	4300.43	0.204461	0.0121893	0.191647	pleckstrin homology domain containing, family A member 5 [Source:MGI Symbol;Acc:MGI:1923802]
Lyst	ENSMUSG00000019726.10	1755.5	1312.66	1128.16	1425.69	1836.48	1698.01	2192.43	-0.390052	0.0123229	0.193286	lysosomal trafficking regulator [Source:MGI Symbol;Acc:MGI:107448]
Wnk4	ENSMUSG00000035112.14	111.509	122.514	162.073	108.831	90.3335	74.0875	65.8749	0.521436	0.0123451	0.193286	WNK lysine deficient protein kinase 4 [Source:MGI Symbol;Acc:MGI:1917097]
Galm	ENSMUSG00000035473.7	237.341	211.97	239.402	193.917	283.647	270.319	405.455	-0.448097	0.0123469	0.193286	galactose mutarotase [Source:MGI Symbol;Acc:MGI:2442420]
Tcrg-C4	ENSMUSG00000076757.9	176.982	209.053	230.928	288.897	378.497	299.354	321.024	-0.459965	0.012357	0.193286	T cell receptor gamma, constant 4 [Source:MGI Symbol;Acc:MGI:98628]
Esf1	ENSMUSG00000045624.12	1491.56	1696.73	1674.76	1647.31	1344.16	1471.74	1363.89	0.211237	0.0124506	0.194457	ESF1, nucleolar pre-rRNA processing protein, homolog (S. cerevisiae) [Source:MGI Symbol;Acc:MGI:1913830]
Slc1a1	ENSMUSG00000024935.7	25.5755	113.763	289.19	163.247	42.4568	8.00946	42.6795	0.526456	0.0124638	0.194457	solute carrier family 1 (neuronal/epithelial high affinity glutamate transporter, system Xag), member 1 [Source:MGI Symbol;Acc:MGI:105083]
Lars2	ENSMUSG00000035202.7	99053.9	112487	106446	91793.1	111988	119044	124552	-0.209126	0.0124891	0.194603	leucyl-tRNA synthetase, mitochondrial [Source:MGI Symbol;Acc:MGI:2142973]
Glce	ENSMUSG00000032252.11	795.909	781.759	1085.79	799.414	644.981	609.72	716.274	0.351935	0.0125219	0.194866	glucuronyl C5-epimerase [Source:MGI Symbol;Acc:MGI:2136405]
Dhrs9	ENSMUSG00000027068.6	2.04604	0	10.593	13.8512	55.1034	16.0189	92.7816	-0.431747	0.012577	NA	dehydrogenase/reductase (SDR family) member 9 [Source:MGI Symbol;Acc:MGI:2442798]
Ppm1d	ENSMUSG00000020525.14	3838.37	4128.54	3665.19	3936.72	3354.08	3541.18	3050.66	0.21795	0.0126236	0.196197	protein phosphatase 1D magnesium-dependent, delta isoform [Source:MGI Symbol;Acc:MGI:1858214]
Cma1	ENSMUSG00000022225.6	18183.2	20533.8	15498.7	18805	25638.5	26427.2	18763.2	-0.342039	0.0127667	0.198168	chymase 1, mast cell [Source:MGI Symbol;Acc:MGI:96941]
Kbtbd2	ENSMUSG00000059486.8	10845	8687.83	8818.7	9356.51	8147.18	7204.51	8079.42	0.253677	0.0128138	0.198647	kelch repeat and BTB (POZ) domain containing 2 [Source:MGI Symbol;Acc:MGI:2384811]
Syne4	ENSMUSG00000019737.11	21.4834	22.3638	36.0163	22.7556	47.8768	65.0769	45.463	-0.586328	0.0129122	NA	spectrin repeat containing, nuclear envelope family member 4 [Source:MGI Symbol;Acc:MGI:2141950]
Piezo2	ENSMUSG00000041482.13	90.0257	262.531	874.984	398.718	174.344	124.147	102.988	0.57335	0.0129291	0.200179	piezo-type mechanosensitive ion channel component 2 [Source:MGI Symbol;Acc:MGI:1918781]
Tfr2	ENSMUSG00000029716.10	0	5.83402	11.6523	17.8087	43.3601	22.026	113.193	-0.448557	0.0129663	NA	transferrin receptor 2 [Source:MGI Symbol;Acc:MGI:1354956]
Nsmf	ENSMUSG00000006476.16	8414.34	8680.05	7285.89	7675.56	9065.87	10198	9103.73	-0.233649	0.0130328	0.201529	NMDA receptor synaptonuclear signaling and neuronal migration factor [Source:MGI Symbol;Acc:MGI:1861755]
Ccnb1	ENSMUSG00000041431.13	79.7955	118.625	261.648	183.034	590.781	131.155	478.753	-0.584255	0.0130696	0.201841	cyclin B1 [Source:MGI Symbol;Acc:MGI:88302]
Tmco6	ENSMUSG00000006850.7	1449.62	1646.17	1488.32	1470.21	1669.36	1867.21	1760.99	-0.219461	0.013117	0.202278	transmembrane and coiled-coil domains 6 [Source:MGI Symbol;Acc:MGI:1919233]
Tmem115	ENSMUSG00000010045.2	3754.48	3925.33	3642.94	3636.94	3219.49	3463.09	3013.54	0.198879	0.0131311	0.202278	transmembrane protein 115 [Source:MGI Symbol;Acc:MGI:1930765]
Ankrd1	ENSMUSG00000024803.8	8.18416	42.7828	40.2535	31.66	90.3335	59.0698	97.4206	-0.575894	0.0132863	NA	ankyrin repeat domain 1 (cardiac muscle) [Source:MGI Symbol;Acc:MGI:1097717]
Fbrsl1	ENSMUSG00000043323.13	4649.62	4393.99	4051.83	4895.42	3568.17	4023.75	3769.71	0.233225	0.0133231	0.204977	fibrosin-like 1 [Source:MGI Symbol;Acc:MGI:1920907]
Trp53inp1	ENSMUSG00000028211.8	6397.96	5462.59	5975.53	6747.53	5584.42	4093.84	5020.41	0.298928	0.0133611	0.205303	transformation related protein 53 inducible nuclear protein 1 [Source:MGI Symbol;Acc:MGI:1926609]
BC100530	ENSMUSG00000071561.2	0	0	0	1.97875	15.3567	3.00355	111.338	-0.347419	0.0133811	NA	cDNA sequence BC100530 [Source:MGI Symbol;Acc:MGI:3696883]
RP24-380C2.2	ENSMUSG00000105676.1	75.7035	45.6999	60.3803	58.3731	102.077	101.119	95.565	-0.52884	0.0134028	0.205671	NA
Dab2ip	ENSMUSG00000026883.14	2456.27	2299.58	2155.68	2402.2	2025.28	2038.41	1689.55	0.26011	0.0134192	0.205671	disabled 2 interacting protein [Source:MGI Symbol;Acc:MGI:1916851]
Tkt	ENSMUSG00000021957.6	7314.59	7969.28	7547.53	8103.96	8305.26	9016.65	8655.59	-0.165217	0.0134441	0.205671	transketolase [Source:MGI Symbol;Acc:MGI:105992]
Dnajc27	ENSMUSG00000020657.12	1312.53	975.254	1038.12	1197.14	822.938	704.833	994.618	0.374445	0.0134526	0.205671	DnaJ (Hsp40) homolog, subfamily C, member 27 [Source:MGI Symbol;Acc:MGI:2443036]
Pdxdc1	ENSMUSG00000022680.10	4207.68	3716.27	4053.95	3995.09	3517.59	3233.82	3663.94	0.190838	0.0134821	0.205864	pyridoxal-dependent decarboxylase domain containing 1 [Source:MGI Symbol;Acc:MGI:1920909]
Lrr1	ENSMUSG00000034883.8	6.13812	25.2808	2.11861	1.97875	54.2001	46.0544	40.8239	-0.474418	0.0135177	NA	leucine rich repeat protein 1 [Source:MGI Symbol;Acc:MGI:1916956]
Zfp219	ENSMUSG00000049295.13	730.436	824.542	813.545	728.179	898.818	951.124	898.125	-0.238017	0.01352	0.206184	zinc finger protein 219 [Source:MGI Symbol;Acc:MGI:1917140]
Ppp1r15b	ENSMUSG00000046062.5	7695.15	6461.18	6646.07	5752.22	6080.35	4610.45	4965.67	0.314671	0.0135915	0.207016	protein phosphatase 1, regulatory (inhibitor) subunit 15b [Source:MGI Symbol;Acc:MGI:2444211]
Gpd2	ENSMUSG00000026827.9	7776.99	7774.81	6867.46	7474.72	8719.89	9154.82	8069.21	-0.208777	0.01362	0.20719	glycerol phosphate dehydrogenase 2, mitochondrial [Source:MGI Symbol;Acc:MGI:99778]
Pim3	ENSMUSG00000035828.10	17416.9	14618.1	15227.5	14004.6	10959.3	14365	11633.9	0.288561	0.0136474	0.207267	proviral integration site 3 [Source:MGI Symbol;Acc:MGI:1355297]
Ndufaf3	ENSMUSG00000070283.4	718.16	646.604	770.113	639.136	906.045	881.041	776.582	-0.288513	0.0136712	0.207267	NADH dehydrogenase (ubiquinone) 1 alpha subcomplex, assembly factor 3 [Source:MGI Symbol;Acc:MGI:1913956]
Cuedc2	ENSMUSG00000036748.12	1456.78	1457.53	1579.42	1388.09	1705.5	1800.13	1599.55	-0.210049	0.0136795	0.207267	CUE domain containing 2 [Source:MGI Symbol;Acc:MGI:1914366]
Secisbp2l	ENSMUSG00000035093.13	5343.23	5393.55	5518.97	5393.08	4958.41	5063.98	4872.89	0.117243	0.0136972	0.207267	SECIS binding protein 2-like [Source:MGI Symbol;Acc:MGI:1917604]
Gatsl2	ENSMUSG00000015944.8	912.533	828.431	765.876	902.309	1084.91	1037.23	985.34	-0.270249	0.0137101	0.207267	GATS protein-like 2 [Source:MGI Symbol;Acc:MGI:1933384]
Il15ra	ENSMUSG00000023206.13	893.096	901.357	891.933	1024.99	822.938	742.878	697.717	0.275011	0.0138244	0.208659	interleukin 15 receptor, alpha chain [Source:MGI Symbol;Acc:MGI:104644]
Pttg1	ENSMUSG00000020415.13	404.093	337.401	350.629	328.472	429.988	462.546	460.197	-0.320966	0.0138369	0.208659	pituitary tumor-transforming gene 1 [Source:MGI Symbol;Acc:MGI:1353578]
Nudt9	ENSMUSG00000029310.10	2030.69	2076.91	2349.53	2089.56	2319.76	2560.02	2450.36	-0.194354	0.0138535	0.208659	nudix (nucleoside diphosphate linked moiety X)-type motif 9 [Source:MGI Symbol;Acc:MGI:1921417]
Il1f9	ENSMUSG00000044103.4	0	0	10.593	5.93625	57.8135	8.00946	208.758	-0.366973	0.0138634	NA	interleukin 1 family, member 9 [Source:MGI Symbol;Acc:MGI:2449929]
Rnf146	ENSMUSG00000038876.8	4785.69	4269.53	4783.81	4770.76	3939.44	4317.1	3845.8	0.193923	0.0139185	0.209346	ring finger protein 146 [Source:MGI Symbol;Acc:MGI:1915281]
Ccdc64	ENSMUSG00000041609.13	325.32	393.797	454.441	370.026	484.188	457.541	745.964	-0.450152	0.0139354	0.209346	coiled-coil domain containing 64 [Source:MGI Symbol;Acc:MGI:1922915]
Kat6b	ENSMUSG00000021767.13	1255.25	1270.84	1168.41	1071.49	999.089	1027.21	914.826	0.261225	0.0139507	0.209346	K(lysine) acetyltransferase 6B [Source:MGI Symbol;Acc:MGI:1858746]
Itpk1	ENSMUSG00000057963.6	6239.4	6298.8	5579.35	5600.85	7372.12	7531.9	6256.26	-0.244295	0.0139803	0.209471	inositol 1,3,4-triphosphate 5/6 kinase [Source:MGI Symbol;Acc:MGI:2446159]
Slc39a9	ENSMUSG00000048833.8	3277.75	2761.44	2959.69	3128.4	2765.11	2238.64	2509.74	0.256206	0.0139934	0.209471	solute carrier family 39 (zinc transporter), member 9 [Source:MGI Symbol;Acc:MGI:1914820]
Rhpn2	ENSMUSG00000030494.10	80.8185	193.495	706.555	254.269	113.82	57.0674	121.544	0.560612	0.0140166	0.209488	rhophilin, Rho GTPase binding protein 2 [Source:MGI Symbol;Acc:MGI:1289234]
F10	ENSMUSG00000031444.13	10.2302	66.1189	143.006	49.4687	345.977	79.0934	296.901	-0.52586	0.0140541	0.209488	coagulation factor X [Source:MGI Symbol;Acc:MGI:103107]
Mfsd10	ENSMUSG00000001082.9	1718.67	1872.72	1811.41	1974.79	2079.48	2126.51	2098.72	-0.188699	0.0140664	0.209488	major facilitator superfamily domain containing 10 [Source:MGI Symbol;Acc:MGI:1915544]
Cox7a2l	ENSMUSG00000024248.10	1913.05	2048.71	2251.02	2078.68	2302.6	2284.7	2615.51	-0.210827	0.0140976	0.209488	cytochrome c oxidase subunit VIIa polypeptide 2-like [Source:MGI Symbol;Acc:MGI:106015]
C330027C09Rik	ENSMUSG00000033031.10	301.791	245.029	189.615	223.599	338.751	295.349	494.526	-0.496239	0.014107	0.209488	RIKEN cDNA C330027C09 gene [Source:MGI Symbol;Acc:MGI:2146335]
Prpf40b	ENSMUSG00000023007.12	635.295	703	956.551	660.902	539.291	502.594	591.018	0.380173	0.0141111	0.209488	PRP40 pre-mRNA processing factor 40 homolog B (yeast) [Source:MGI Symbol;Acc:MGI:1925583]
Klf6	ENSMUSG00000000078.6	121945	96803	94013.1	98385.3	62387	93980	79711.4	0.344075	0.0141149	0.209488	Kruppel-like factor 6 [Source:MGI Symbol;Acc:MGI:1346318]
Acaa1a	ENSMUSG00000036138.13	3025.07	3581.12	3310.32	3272.85	3654.89	3818.51	3797.55	-0.188735	0.0142075	0.210606	acetyl-Coenzyme A acyltransferase 1A [Source:MGI Symbol;Acc:MGI:2148491]
Epc1	ENSMUSG00000024240.10	4651.67	4044.92	3597.39	4855.85	3187.87	3806.5	3073.85	0.319872	0.0142323	0.210717	enhancer of polycomb homolog 1 (Drosophila) [Source:MGI Symbol;Acc:MGI:1278322]
2610203C22Rik	ENSMUSG00000079671.5	30.6906	46.6722	191.734	72.2243	28.9067	23.0272	23.1954	0.550929	0.0142565	NA	RIKEN cDNA 2610203C22 gene [Source:MGI Symbol;Acc:MGI:1919731]
Gm37811	ENSMUSG00000102900.1	101.279	120.57	69.914	98.9374	64.1368	51.0603	52.8855	0.541571	0.0142614	0.210892	NA
Pdp1	ENSMUSG00000049225.11	2698.73	2539.74	2758.43	2540.71	2473.33	2167.56	2101.5	0.214621	0.0143745	0.212307	pyruvate dehyrogenase phosphatase catalytic subunit 1 [Source:MGI Symbol;Acc:MGI:2685870]
Wdr75	ENSMUSG00000025995.13	2172.89	2150.81	2251.02	2396.26	1908.75	1964.32	2038.41	0.176733	0.0144163	0.212551	WD repeat domain 75 [Source:MGI Symbol;Acc:MGI:1920924]
Nr4a3	ENSMUSG00000028341.6	1339.13	979.144	1174.77	936.937	1287.25	1450.71	1631.1	-0.357745	0.014439	0.212551	nuclear receptor subfamily 4, group A, member 3 [Source:MGI Symbol;Acc:MGI:1352457]
Cmya5	ENSMUSG00000047419.5	188.236	131.266	123.938	134.555	203.25	190.225	307.107	-0.512178	0.0144434	0.212551	cardiomyopathy associated 5 [Source:MGI Symbol;Acc:MGI:1923719]
Ier2	ENSMUSG00000053560.4	92930.1	83719.2	80351.3	78566.2	66257.8	79095.4	62477.2	0.256587	0.0144717	0.212711	immediate early response 2 [Source:MGI Symbol;Acc:MGI:104815]
Nab2	ENSMUSG00000025402.9	1829.16	2228.6	2091.06	2080.65	2523.02	2393.83	2304.69	-0.223799	0.0145814	0.214054	Ngfi-A binding protein 2 [Source:MGI Symbol;Acc:MGI:107563]
Sod2	ENSMUSG00000006818.4	3106.91	3331.23	3407.78	3094.76	3508.55	3707.38	3586.93	-0.157635	0.0145982	0.214054	superoxide dismutase 2, mitochondrial [Source:MGI Symbol;Acc:MGI:98352]
Msrb1	ENSMUSG00000075705.9	358.057	383.101	496.813	475.889	619.688	480.568	662.46	-0.399375	0.0146346	0.214329	methionine sulfoxide reductase B1 [Source:MGI Symbol;Acc:MGI:1351642]
Spdl1	ENSMUSG00000069910.2	42.9668	45.6999	82.6256	17.8087	108.4	93.11	130.822	-0.577383	0.0146982	NA	spindle apparatus coiled-coil protein 1 [Source:MGI Symbol;Acc:MGI:1917635]
Erg	ENSMUSG00000040732.15	85.9336	299.48	930.068	381.898	171.634	142.168	109.482	0.561109	0.0147543	0.215824	avian erythroblastosis virus E-26 (v-ets) oncogene related [Source:MGI Symbol;Acc:MGI:95415]
Gja5	ENSMUSG00000057123.11	184.144	316.982	1506.33	314.621	207.767	186.22	181.852	0.560399	0.0147887	0.215849	gap junction protein, alpha 5 [Source:MGI Symbol;Acc:MGI:95716]
Ndufs8	ENSMUSG00000059734.6	1795.4	1940.79	1810.35	1775.93	2244.79	2088.47	1989.24	-0.202552	0.0147915	0.215849	NADH dehydrogenase (ubiquinone) Fe-S protein 8 [Source:MGI Symbol;Acc:MGI:2385079]
Prkce	ENSMUSG00000045038.11	509.464	546.454	1162.06	872.628	415.534	408.483	554.834	0.523495	0.0150142	0.218623	protein kinase C, epsilon [Source:MGI Symbol;Acc:MGI:97599]
Focad	ENSMUSG00000038368.13	771.357	843.016	778.588	811.287	710.021	508.601	648.543	0.326576	0.0150205	0.218623	focadhesin [Source:MGI Symbol;Acc:MGI:2676921]
Atp13a2	ENSMUSG00000036622.12	13137.6	13827.6	12783.7	12837.1	12117.3	11648.8	11778.6	0.142249	0.0150354	0.218623	ATPase type 13A2 [Source:MGI Symbol;Acc:MGI:1922022]
Slc3a2	ENSMUSG00000010095.10	16096.2	12345.8	17421.3	12806.5	10826.5	12458.7	11576.4	0.304173	0.0150744	0.218797	solute carrier family 3 (activators of dibasic and neutral amino acid transport), member 2 [Source:MGI Symbol;Acc:MGI:96955]
Tmod2	ENSMUSG00000032186.11	87.9797	280.033	1030.7	346.281	135.5	54.0639	181.852	0.540549	0.0150934	0.218797	tropomodulin 2 [Source:MGI Symbol;Acc:MGI:1355335]
Aqp11	ENSMUSG00000042797.8	260.87	312.12	266.944	252.29	220.414	172.203	204.119	0.390967	0.0151012	0.218797	aquaporin 11 [Source:MGI Symbol;Acc:MGI:1913583]
Arl4a	ENSMUSG00000047446.15	4056.27	3770.72	3847.39	3810.08	3312.53	3576.22	2821.49	0.240512	0.0151394	0.21909	ADP-ribosylation factor-like 4A [Source:MGI Symbol;Acc:MGI:99437]
Arpc3	ENSMUSG00000029465.11	11180.6	11384.1	10961.7	10116.4	12289	13218.6	11688.6	-0.185314	0.0151866	0.219512	actin related protein 2/3 complex, subunit 3 [Source:MGI Symbol;Acc:MGI:1928375]
4833417C18Rik	ENSMUSG00000086015.1	72.6344	71.953	79.4477	100.916	53.2968	22.026	45.463	0.569295	0.0152698	NA	RIKEN cDNA 4833417C18 gene [Source:MGI Symbol;Acc:MGI:1921156]
Brip1	ENSMUSG00000034329.13	140.154	133.21	172.666	127.629	221.317	153.181	405.455	-0.553183	0.0152803	0.219836	BRCA1 interacting protein C-terminal helicase 1 [Source:MGI Symbol;Acc:MGI:2442836]
Fam151b	ENSMUSG00000034334.7	369.31	357.82	314.613	365.079	252.031	293.347	266.283	0.338616	0.0152964	0.219836	family with sequence similarity 151, member B [Source:MGI Symbol;Acc:MGI:1921192]
Map3k5	ENSMUSG00000071369.7	2327.37	1934.95	2354.83	2233.02	2557.34	2431.87	3117.46	-0.276006	0.0152976	0.219836	mitogen-activated protein kinase kinase kinase 5 [Source:MGI Symbol;Acc:MGI:1346876]
Tm6sf1	ENSMUSG00000038623.6	18655.8	17398	13851.4	15690.5	19003.5	22593.7	19304.1	-0.290842	0.0153048	0.219836	transmembrane 6 superfamily member 1 [Source:MGI Symbol;Acc:MGI:1933209]
Ssr2	ENSMUSG00000041355.10	3316.63	3866.99	3874.93	3464.79	4313.43	4257.03	3965.48	-0.202707	0.015305	0.219836	signal sequence receptor, beta [Source:MGI Symbol;Acc:MGI:1913506]
Zfp808	ENSMUSG00000074867.3	351.919	264.476	386.646	397.728	595.298	423.5	473.186	-0.428646	0.0153189	0.219836	zinc finger protein 80 [Source:MGI Symbol;Acc:MGI:3704127]
Prss22	ENSMUSG00000045027.6	0	0	6.35582	0	34.3267	50.0591	21.3398	-0.358442	0.0153301	NA	protease, serine 22 [Source:MGI Symbol;Acc:MGI:1918085]
Ptgs1	ENSMUSG00000047250.10	2018.42	2346.25	3216.04	2316.12	1887.97	1906.25	1892.74	0.339397	0.0153353	0.219836	prostaglandin-endoperoxide synthase 1 [Source:MGI Symbol;Acc:MGI:97797]
Rcbtb2	ENSMUSG00000022106.11	1760.62	1731.73	1694.88	1843.2	1513.09	1523.8	1593.99	0.177567	0.0153685	0.220053	regulator of chromosome condensation (RCC1) and BTB (POZ) domain containing protein 2 [Source:MGI Symbol;Acc:MGI:1917200]
Yrdc	ENSMUSG00000028889.14	5206.15	5005.59	4605.85	5090.33	4348.66	4506.32	3905.18	0.213333	0.0154096	0.220107	yrdC domain containing (E.coli) [Source:MGI Symbol;Acc:MGI:2387201]
Hmga1	ENSMUSG00000046711.12	702.814	830.376	616.514	719.275	979.215	995.176	810.911	-0.340632	0.015413	0.220107	high mobility group AT-hook 1 [Source:MGI Symbol;Acc:MGI:96160]
Scrn3	ENSMUSG00000008226.11	1291.05	1067.63	1220.32	1192.2	969.279	1062.25	877.713	0.274721	0.0154314	0.220107	secernin 3 [Source:MGI Symbol;Acc:MGI:1921866]
Alox5ap	ENSMUSG00000060063.6	76.7265	110.846	378.171	333.419	817.518	175.207	934.31	-0.55142	0.0154445	0.220107	arachidonate 5-lipoxygenase activating protein [Source:MGI Symbol;Acc:MGI:107505]
Gid8	ENSMUSG00000027573.8	1629.67	1478.92	1590.01	1528.58	1803.96	1810.14	1699.76	-0.187089	0.0154821	0.220384	GID complex subunit 8 homolog (S. cerevisiae) [Source:MGI Symbol;Acc:MGI:1923675]
Tnfsf10	ENSMUSG00000039304.8	743.735	1181.39	3779.59	1588.93	675.695	571.675	723.696	0.563748	0.0155188	0.220649	tumor necrosis factor (ligand) superfamily, member 10 [Source:MGI Symbol;Acc:MGI:107414]
Maff	ENSMUSG00000042622.10	1263.43	723.419	1085.79	779.627	329.717	596.705	779.365	0.526653	0.0155599	0.220792	v-maf musculoaponeurotic fibrosarcoma oncogene family, protein F (avian) [Source:MGI Symbol;Acc:MGI:96910]
G6pc3	ENSMUSG00000034793.12	620.973	635.909	739.394	583.731	743.445	794.939	816.478	-0.27274	0.0155651	0.220792	glucose 6 phosphatase, catalytic, 3 [Source:MGI Symbol;Acc:MGI:1915651]
Mllt6	ENSMUSG00000038437.8	1962.15	2185.81	1758.44	1678.97	2362.22	2664.15	2120.06	-0.308231	0.0155884	0.220866	myeloid/lymphoid or mixed-lineage leukemia (trithorax homolog, Drosophila); translocated to, 6 [Source:MGI Symbol;Acc:MGI:1935145]
Tdrd3	ENSMUSG00000022019.12	2153.46	2005.93	2436.4	2092.53	1777.76	1891.23	1909.44	0.209956	0.015641	0.221138	tudor domain containing 3 [Source:MGI Symbol;Acc:MGI:2444023]
Rexo2	ENSMUSG00000032026.6	2392.84	2567.94	2808.21	2577.32	2944.87	2896.42	2879.01	-0.171107	0.0156536	0.221138	REX2, RNA exonuclease 2 homolog (S. cerevisiae) [Source:MGI Symbol;Acc:MGI:1888981]
Akt2	ENSMUSG00000004056.12	18838.9	19305.8	16260.3	17948.2	20975.4	21755.7	19991.6	-0.20679	0.0156713	0.221138	thymoma viral proto-oncogene 2 [Source:MGI Symbol;Acc:MGI:104874]
Ckap2	ENSMUSG00000037725.7	110.486	122.514	109.108	101.906	286.357	105.124	219.892	-0.554883	0.0156846	0.221138	cytoskeleton associated protein 2 [Source:MGI Symbol;Acc:MGI:1931797]
Glul	ENSMUSG00000026473.12	2283.38	2104.14	2480.89	1933.24	1753.37	1895.24	1854.7	0.243715	0.0157179	0.221138	glutamate-ammonia ligase (glutamine synthetase) [Source:MGI Symbol;Acc:MGI:95739]
Tm6sf2	ENSMUSG00000036151.12	3202.05	2966.6	2273.26	2737.6	3413.7	3837.53	3333.64	-0.312707	0.0157276	0.221138	transmembrane 6 superfamily member 2 [Source:MGI Symbol;Acc:MGI:1933210]
Hmces	ENSMUSG00000030060.11	2514.58	2439.59	2283.86	2421	2747.04	3078.64	2618.3	-0.217943	0.0157346	0.221138	5-hydroxymethylcytosine (hmC) binding, ES cell specific [Source:MGI Symbol;Acc:MGI:1914053]
Farp2	ENSMUSG00000034066.10	384.655	483.252	521.177	365.079	325.201	338.4	298.757	0.385632	0.0157552	0.221172	FERM, RhoGEF and pleckstrin domain protein 2 [Source:MGI Symbol;Acc:MGI:2385126]
Rundc3b	ENSMUSG00000040570.11	2388.75	1652.97	1879.2	2309.2	1721.76	1578.87	1310.08	0.366656	0.0160159	0.224573	RUN domain containing 3B [Source:MGI Symbol;Acc:MGI:2685286]
Per1	ENSMUSG00000020893.14	9379.04	6024.6	6762.59	6911.77	3774.13	5736.78	6050.29	0.40992	0.0160461	0.224738	period circadian clock 1 [Source:MGI Symbol;Acc:MGI:1098283]
Med22	ENSMUSG00000015776.9	3706.4	3794.06	3784.89	3499.42	3381.18	3172.75	3362.4	0.15242	0.0161194	0.22527	mediator complex subunit 22 [Source:MGI Symbol;Acc:MGI:98446]
Agrn	ENSMUSG00000041936.15	885.935	1194.03	2525.38	1178.34	960.245	700.828	837.817	0.531577	0.0161473	0.22527	agrin [Source:MGI Symbol;Acc:MGI:87961]
Mms22l	ENSMUSG00000045751.13	1387.21	1474.06	1362.26	1296.08	1702.79	1516.79	1593.99	-0.215119	0.0161484	0.22527	MMS22-like, DNA repair protein [Source:MGI Symbol;Acc:MGI:2684980]
Ppm1f	ENSMUSG00000026181.11	2893.1	3223.3	6545.43	3561.75	2858.15	2344.77	2663.76	0.477392	0.016158	0.22527	protein phosphatase 1F (PP2C domain containing) [Source:MGI Symbol;Acc:MGI:1918464]
Armcx1	ENSMUSG00000033460.11	126.854	278.088	1185.36	364.09	149.05	153.181	196.697	0.553992	0.0161968	0.225552	armadillo repeat containing, X-linked 1 [Source:MGI Symbol;Acc:MGI:1925498]
Hivep3	ENSMUSG00000028634.13	1489.52	1476.98	1355.91	1606.74	1368.55	1117.32	1103.17	0.283341	0.0162513	0.226053	human immunodeficiency virus type I enhancer binding protein 3 [Source:MGI Symbol;Acc:MGI:106589]
Zfp37	ENSMUSG00000028389.7	14.3223	64.1743	172.666	92.0118	25.2934	10.0118	25.051	0.510616	0.0162667	NA	zinc finger protein 37 [Source:MGI Symbol;Acc:MGI:99181]
Klhl21	ENSMUSG00000073700.3	2611.77	2759.49	2596.35	2551.6	2450.75	2228.63	2064.39	0.212309	0.0162824	0.226228	kelch-like 21 [Source:MGI Symbol;Acc:MGI:1919288]
Ston2	ENSMUSG00000020961.11	41.9438	87.5104	227.75	118.725	61.4268	32.0378	31.5457	0.555942	0.0163621	0.226992	stonin 2 [Source:MGI Symbol;Acc:MGI:1918272]
Gm20692	ENSMUSG00000093739.1	38.8747	67.0913	37.0756	65.2987	112.014	88.1041	89.0703	-0.553488	0.0163624	NA	predicted gene 20692 [Source:MGI Symbol;Acc:MGI:5313139]
Mafg	ENSMUSG00000051510.10	3065.99	2666.15	2806.09	2698.02	2257.43	2041.41	2647.06	0.258965	0.0163747	0.226992	v-maf musculoaponeurotic fibrosarcoma oncogene family, protein G (avian) [Source:MGI Symbol;Acc:MGI:96911]
Tiam1	ENSMUSG00000002489.12	53.197	103.068	114.405	123.672	213.187	126.149	205.975	-0.553063	0.0164565	0.227866	T cell lymphoma invasion and metastasis 1 [Source:MGI Symbol;Acc:MGI:103306]
Zfp943	ENSMUSG00000053347.11	1321.74	1071.52	1133.45	1297.07	1024.38	967.143	962.145	0.269964	0.0164947	0.228136	zinc finger prtoein 943 [Source:MGI Symbol;Acc:MGI:1921920]
Serpina3f	ENSMUSG00000066363.9	71.6114	193.495	496.813	159.289	114.724	61.0722	65.8749	0.554538	0.0165681	0.228891	serine (or cysteine) peptidase inhibitor, clade A, member 3F [Source:MGI Symbol;Acc:MGI:2182838]
Ppapdc1b	ENSMUSG00000031570.13	647.571	648.549	848.502	745.988	600.718	548.648	563.184	0.30607	0.0165887	0.228916	phosphatidic acid phosphatase type 2 domain containing 1B [Source:MGI Symbol;Acc:MGI:1919160]
6030458C11Rik	ENSMUSG00000022195.6	4109.47	3747.39	3863.28	3753.69	4099.33	4524.35	4447.95	-0.172846	0.0166403	0.229369	RIKEN cDNA 6030458C11 gene [Source:MGI Symbol;Acc:MGI:1925127]
Olfml2a	ENSMUSG00000046618.7	49.1049	338.373	860.154	259.216	101.174	42.0497	146.595	0.517758	0.0166903	0.229798	olfactomedin-like 2A [Source:MGI Symbol;Acc:MGI:2444741]
Arhgap23	ENSMUSG00000049807.13	557.546	588.264	1733.02	780.616	510.384	435.515	507.515	0.552151	0.0167302	0.230087	Rho GTPase activating protein 23 [Source:MGI Symbol;Acc:MGI:3697726]
Zfx	ENSMUSG00000079509.7	2674.17	2129.42	2150.39	2239.94	2034.31	1773.09	1800.89	0.274513	0.0167984	0.230766	zinc finger protein X-linked [Source:MGI Symbol;Acc:MGI:99211]
Pik3r3	ENSMUSG00000028698.10	164.706	131.266	661.005	230.524	114.724	107.127	130.822	0.563356	0.0168377	0.231045	phosphatidylinositol 3 kinase, regulatory subunit, polypeptide 3 (p55) [Source:MGI Symbol;Acc:MGI:109277]
Gpr137b-ps	ENSMUSG00000097715.1	907.418	864.408	973.5	930.012	992.765	1077.27	1316.57	-0.282401	0.0168772	0.231213	G protein-coupled receptor 137B, pseudogene [Source:MGI Symbol;Acc:MGI:3710533]
Rgs12	ENSMUSG00000029101.11	817.393	1273.76	3535.95	1417.77	949.405	781.924	928.743	0.559588	0.0168879	0.231213	regulator of G-protein signaling 12 [Source:MGI Symbol;Acc:MGI:1918979]
Fam65a	ENSMUSG00000038604.8	4389.78	4763.48	6970.21	5076.48	4115.59	3959.68	4203.93	0.330051	0.0169206	0.2314	family with sequence similarity 65, member A [Source:MGI Symbol;Acc:MGI:1922937]
Klf9	ENSMUSG00000033863.1	1412.79	1966.07	3169.43	2206.3	1385.72	1521.8	1516.05	0.449543	0.0170005	0.232233	Kruppel-like factor 9 [Source:MGI Symbol;Acc:MGI:1333856]
Map3k3	ENSMUSG00000020700.11	9244.01	9126.36	9492.41	9546.47	8675.63	8496.04	8815.18	0.103793	0.0170825	0.232675	mitogen-activated protein kinase kinase kinase 3 [Source:MGI Symbol;Acc:MGI:1346874]
Trim36	ENSMUSG00000033949.8	1823.02	1351.55	1420.53	1387.1	1158.98	1284.52	928.743	0.359824	0.0170833	0.232675	tripartite motif-containing 36 [Source:MGI Symbol;Acc:MGI:106264]
Rem2	ENSMUSG00000022176.8	57.2891	73.8976	82.6256	49.4687	98.4635	96.1135	146.595	-0.533013	0.0171045	0.232675	rad and gem related GTP binding protein 2 [Source:MGI Symbol;Acc:MGI:2155260]
Slc25a20	ENSMUSG00000032602.6	2335.55	2745.88	2436.4	3623.09	2212.27	2000.36	2120.06	0.351712	0.0171363	0.232675	solute carrier family 25 (mitochondrial carnitine/acylcarnitine translocase), member 20 [Source:MGI Symbol;Acc:MGI:1928738]
Brd9	ENSMUSG00000057649.5	3952.95	3317.61	3516.89	3395.53	3030.69	3068.63	3061.79	0.203067	0.0171399	0.232675	bromodomain containing 9 [Source:MGI Symbol;Acc:MGI:2145317]
Pdcd4	ENSMUSG00000024975.9	9158.07	8103.46	7584.61	9147.75	9585.29	10463.4	9863.61	-0.225546	0.0171485	0.232675	programmed cell death 4 [Source:MGI Symbol;Acc:MGI:107490]
Asb13	ENSMUSG00000033781.6	3235.81	3444.02	3437.44	3013.63	2775.95	2977.52	2870.66	0.180665	0.0171666	0.232675	ankyrin repeat and SOCS box-containing 13 [Source:MGI Symbol;Acc:MGI:2145525]
Apln	ENSMUSG00000037010.7	118.67	351.986	1683.23	724.222	158.987	60.071	137.317	0.46929	0.0172047	0.232758	apelin [Source:MGI Symbol;Acc:MGI:1353624]
Pole2	ENSMUSG00000020974.5	306.906	325.733	389.824	313.632	468.831	365.432	501.948	-0.370878	0.0172109	0.232758	polymerase (DNA directed), epsilon 2 (p59 subunit) [Source:MGI Symbol;Acc:MGI:1197514]
Zfp930	ENSMUSG00000059897.4	461.382	600.904	560.371	543.166	445.344	432.511	397.105	0.314072	0.0172431	0.232934	zinc finger protein 930 [Source:MGI Symbol;Acc:MGI:2675306]
Klhl24	ENSMUSG00000062901.2	3417.91	3193.16	3777.47	3798.21	2879.83	2729.22	3322.51	0.235328	0.0173209	0.233726	kelch-like 24 [Source:MGI Symbol;Acc:MGI:1923035]
Gli3	ENSMUSG00000021318.12	4.09208	3.88935	28.6012	7.91499	28.0034	50.0591	54.7411	-0.486108	0.0173841	NA	GLI-Kruppel family member GLI3 [Source:MGI Symbol;Acc:MGI:95729]
Gramd3	ENSMUSG00000001700.9	7069.07	6293.94	5390.79	6549.66	4080.36	4480.29	6041.93	0.337791	0.0174149	0.234735	GRAM domain containing 3 [Source:MGI Symbol;Acc:MGI:1914815]
Fam126a	ENSMUSG00000028995.11	3649.11	3151.35	3461.8	3214.48	3065.02	2708.2	2909.63	0.205826	0.0174652	0.235153	family with sequence similarity 126, member A [Source:MGI Symbol;Acc:MGI:2149839]
Ica1	ENSMUSG00000062995.9	256.778	459.916	1405.7	538.22	297.197	225.266	347.931	0.563623	0.0175229	0.235582	islet cell autoantigen 1 [Source:MGI Symbol;Acc:MGI:96391]
Hey1	ENSMUSG00000040289.5	572.891	1384.61	4257.34	1764.05	693.761	536.634	554.834	0.530498	0.0175357	0.235582	hairy/enhancer-of-split related with YRPW motif 1 [Source:MGI Symbol;Acc:MGI:1341800]
Fmo1	ENSMUSG00000040181.11	972.892	2987.02	10618.5	4156.36	1301.71	758.897	1264.61	0.502957	0.017575	0.23585	flavin containing monooxygenase 1 [Source:MGI Symbol;Acc:MGI:1310002]
Gm26857	ENSMUSG00000097860.1	56.2661	36.9488	57.2024	60.3518	66.8468	129.153	96.4928	-0.548833	0.0176384	NA	predicted gene, 26857 [Source:MGI Symbol;Acc:MGI:5477351]
Dgkg	ENSMUSG00000022861.13	11.2532	27.2254	59.321	36.6068	94.8502	51.0603	122.472	-0.546779	0.0177127	NA	diacylglycerol kinase, gamma [Source:MGI Symbol;Acc:MGI:105060]
Bloc1s6	ENSMUSG00000005804.11	4255.76	4029.37	4047.6	3945.62	4373.95	4688.54	4473	-0.151511	0.0177211	0.237353	biogenesis of lysosomal organelles complex-1, subunit 6, pallidin [Source:MGI Symbol;Acc:MGI:1927580]
Nuf2	ENSMUSG00000026683.11	49.1049	91.3997	213.979	69.2562	191.507	224.265	292.262	-0.562176	0.017726	0.237353	NUF2, NDC80 kinetochore complex component, homolog (S. cerevisiae) [Source:MGI Symbol;Acc:MGI:1914227]
Igll1	ENSMUSG00000075370.7	0	0	0	0	9.03335	2.00237	67.7305	-0.316502	0.0177265	NA	immunoglobulin lambda-like polypeptide 1 [Source:MGI Symbol;Acc:MGI:96529]
Faah	ENSMUSG00000034171.10	1534.53	1825.08	1755.27	1767.02	1989.14	1871.21	2965.3	-0.360388	0.0178423	0.238649	fatty acid amide hydrolase [Source:MGI Symbol;Acc:MGI:109609]
Gcat	ENSMUSG00000006378.10	11.2532	51.5339	128.176	40.5643	191.507	124.147	194.841	-0.530899	0.0178899	0.238712	glycine C-acetyltransferase (2-amino-3-ketobutyrate-coenzyme A ligase) [Source:MGI Symbol;Acc:MGI:1349389]
Pter	ENSMUSG00000026730.9	985.168	802.178	700.199	755.882	616.075	594.703	658.749	0.338004	0.0178973	0.238712	phosphotriesterase related [Source:MGI Symbol;Acc:MGI:107372]
Phactr1	ENSMUSG00000054728.13	113.555	357.82	1026.46	473.91	179.764	116.137	242.16	0.550215	0.0179059	0.238712	phosphatase and actin regulator 1 [Source:MGI Symbol;Acc:MGI:2659021]
Slc17a6	ENSMUSG00000030500.5	8.18416	16.5297	27.5419	55.405	51.4901	87.1029	101.132	-0.53022	0.0179884	NA	solute carrier family 17 (sodium-dependent inorganic phosphate cotransporter), member 6 [Source:MGI Symbol;Acc:MGI:2156052]
Poc1a	ENSMUSG00000023345.12	200.512	149.74	210.801	223.599	304.424	273.323	250.51	-0.41773	0.0180374	0.240202	POC1 centriolar protein homolog A (Chlamydomonas) [Source:MGI Symbol;Acc:MGI:1917485]
Nudt16l1	ENSMUSG00000022516.9	2584.15	2726.43	2502.07	2481.35	2972.88	3207.79	2742.62	-0.206992	0.0180859	0.240585	nudix (nucleoside diphosphate linked moiety X)-type motif 16-like 1 [Source:MGI Symbol;Acc:MGI:1914161]
Fam83f	ENSMUSG00000022408.6	12.2762	22.3638	30.7198	20.7769	47.8768	35.0414	62.1636	-0.560196	0.0180926	NA	family with sequence similarity 83, member F [Source:MGI Symbol;Acc:MGI:2146227]
Ppp2r3a	ENSMUSG00000043154.12	353.965	394.769	646.175	404.654	294.487	291.344	321.024	0.44981	0.0181086	0.240625	protein phosphatase 2, regulatory subunit B'', alpha [Source:MGI Symbol;Acc:MGI:2442104]
Rgs9	ENSMUSG00000020599.10	73.6574	123.487	659.946	152.364	94.8502	48.0568	76.0809	0.523037	0.0182266	0.241739	regulator of G-protein signaling 9 [Source:MGI Symbol;Acc:MGI:1338824]
Plekhh1	ENSMUSG00000060716.6	117.647	168.214	473.508	250.312	102.98	92.1088	145.667	0.560287	0.0182321	0.241739	pleckstrin homology domain containing, family H (with MyTH4 domain) member 1 [Source:MGI Symbol;Acc:MGI:2144989]
Arhgap33	ENSMUSG00000036882.6	303.837	295.591	236.225	259.216	163.504	197.233	224.531	0.408528	0.018298	0.242348	Rho GTPase activating protein 33 [Source:MGI Symbol;Acc:MGI:2673998]
Ar	ENSMUSG00000046532.7	351.919	409.354	316.732	372.994	427.278	497.588	475.969	-0.33217	0.0183858	0.243108	androgen receptor [Source:MGI Symbol;Acc:MGI:88064]
Zfp592	ENSMUSG00000005621.11	9862.93	8501.14	8790.1	9254.61	8105.63	7451.8	8230.65	0.188156	0.0184101	0.243108	zinc finger protein 592 [Source:MGI Symbol;Acc:MGI:2443541]
Ska3	ENSMUSG00000021965.2	90.0257	47.6445	161.014	84.0968	186.087	165.195	203.192	-0.553417	0.0184335	0.243108	spindle and kinetochore associated complex subunit 3 [Source:MGI Symbol;Acc:MGI:3041235]
Gm23935	ENSMUSG00000076258.1	39705.4	44681.8	43196.3	38632.1	45256.2	47553.2	46474.3	-0.162479	0.0184351	0.243108	predicted gene, 23935 [Source:MGI Symbol;Acc:MGI:5453712]
Dock6	ENSMUSG00000032198.8	695.653	942.195	2308.22	1109.09	712.731	527.623	818.333	0.540586	0.0184939	0.243619	dedicator of cytokinesis 6 [Source:MGI Symbol;Acc:MGI:1914789]
Mrpl4	ENSMUSG00000003299.9	5480.32	6417.43	5631.26	5925.36	6915.93	7429.78	6225.64	-0.222213	0.0185924	0.244653	mitochondrial ribosomal protein L4 [Source:MGI Symbol;Acc:MGI:2137210]
Klc1	ENSMUSG00000021288.15	5346.3	5519.96	6547.55	5498.94	4766.9	5219.17	4763.4	0.205755	0.0187139	0.245986	kinesin light chain 1 [Source:MGI Symbol;Acc:MGI:107978]
Ets1	ENSMUSG00000032035.12	71338.2	66085.9	69067.6	67963.1	76390.5	71869.9	75532.5	-0.124721	0.0188114	0.246872	E26 avian leukemia oncogene 1, 5' domain [Source:MGI Symbol;Acc:MGI:95455]
Alas2	ENSMUSG00000025270.10	72.6344	38.8935	129.235	67.2774	51.4901	118.14	610.503	-0.504278	0.018827	0.246872	aminolevulinic acid synthase 2, erythroid [Source:MGI Symbol;Acc:MGI:87990]
Sc5d	ENSMUSG00000032018.10	1935.55	1586.85	1718.19	1785.82	1552.83	1465.73	1405.64	0.235008	0.0188435	0.246872	sterol-C5-desaturase (fungal ERG3, delta-5-desaturase) homolog (S. cerevisae) [Source:MGI Symbol;Acc:MGI:1353611]
Gm26917	ENSMUSG00000097971.3	85800.7	65103.8	60762.7	56040.1	63818.8	100882	120065	-0.420113	0.0188623	0.246872	predicted gene, 26917 [Source:MGI Symbol;Acc:MGI:5504032]
Pif1	ENSMUSG00000041064.10	32.7366	25.2808	16.9488	1.97875	83.1068	53.0627	64.0193	-0.500272	0.0188669	NA	PIF1 5'-to-3' DNA helicase homolog (S. cerevisiae) [Source:MGI Symbol;Acc:MGI:2143057]
Chst7	ENSMUSG00000037347.7	104.348	101.123	521.177	208.758	83.1068	48.0568	114.121	0.540552	0.0189238	0.24741	carbohydrate (N-acetylglucosamino) sulfotransferase 7 [Source:MGI Symbol;Acc:MGI:1891767]
Utp18	ENSMUSG00000054079.9	3796.43	3574.31	3552.9	4068.31	3330.6	3209.79	3295.6	0.18242	0.0190127	0.248102	UTP18, small subunit (SSU) processome component, homolog (yeast) [Source:MGI Symbol;Acc:MGI:1923402]
Elmsan1	ENSMUSG00000042507.11	4762.16	3850.46	4078.32	3789.3	3227.62	3585.24	3509.93	0.242063	0.0190174	0.248102	ELM2 and Myb/SANT-like domain containing 1 [Source:MGI Symbol;Acc:MGI:2685106]
Ncs1	ENSMUSG00000062661.6	6.13812	3.88935	36.0163	21.7662	75.8802	44.052	61.2358	-0.493184	0.0190516	NA	neuronal calcium sensor 1 [Source:MGI Symbol;Acc:MGI:109166]
Sytl4	ENSMUSG00000031255.11	22.5064	62.2296	223.513	79.1499	21.68	2.00237	25.9788	0.461583	0.0190522	NA	synaptotagmin-like 4 [Source:MGI Symbol;Acc:MGI:1351606]
Cdh22	ENSMUSG00000053166.11	3195.91	3177.6	2400.38	3088.83	2542.89	2398.83	2112.64	0.303484	0.0190532	0.248303	cadherin 22 [Source:MGI Symbol;Acc:MGI:1341843]
Hip1r	ENSMUSG00000000915.12	11562.2	11194.5	9582.46	10961.3	12036.9	12695	12750	-0.203986	0.0191142	0.248832	huntingtin interacting protein 1 related [Source:MGI Symbol;Acc:MGI:1352504]
Parpbp	ENSMUSG00000035365.12	21.4834	41.8105	60.3803	8.90437	87.6235	76.0899	105.771	-0.535621	0.0192405	NA	PARP1 binding protein [Source:MGI Symbol;Acc:MGI:1922567]
Smim14	ENSMUSG00000037822.9	6134.03	6300.75	6576.15	6583.3	7006.27	6791.02	6949.34	-0.116901	0.0192562	0.250301	small integral membrane protein 14 [Source:MGI Symbol;Acc:MGI:1915802]
Trdv4	ENSMUSG00000076867.2	405.116	279.061	294.486	339.355	427.278	493.583	424.012	-0.385896	0.0192682	0.250301	T cell receptor delta variable 4 [Source:MGI Symbol;Acc:MGI:4887419]
St8sia4	ENSMUSG00000040710.7	6257.81	4969.62	6170.44	6304.29	5245.67	4862.74	4783.82	0.237078	0.0193433	0.250761	ST8 alpha-N-acetyl-neuraminide alpha-2,8-sialyltransferase 4 [Source:MGI Symbol;Acc:MGI:106018]
Tada2b	ENSMUSG00000029196.9	1086.45	529.924	1486.2	469.953	1828.35	1791.12	1251.62	-0.54017	0.0193447	0.250761	transcriptional adaptor 2B [Source:MGI Symbol;Acc:MGI:3035274]
Slc5a6	ENSMUSG00000006641.9	665.986	603.821	677.954	712.349	579.941	490.58	553.906	0.271363	0.0194144	0.251002	solute carrier family 5 (sodium-dependent vitamin transporter), member 6 [Source:MGI Symbol;Acc:MGI:2660847]
Fastkd5	ENSMUSG00000079043.2	213.811	222.665	248.936	238.439	193.314	157.186	166.079	0.364474	0.0194603	0.251002	FAST kinase domains 5 [Source:MGI Symbol;Acc:MGI:2139469]
Sec31a	ENSMUSG00000035325.13	10811.3	10168.7	11111	10771.3	9560.9	9912.71	9984.22	0.118659	0.0195062	0.251002	Sec31 homolog A (S. cerevisiae) [Source:MGI Symbol;Acc:MGI:1916412]
Tmeff1	ENSMUSG00000028347.11	164.706	223.638	1337.9	490.73	214.994	188.222	182.78	0.538382	0.0195211	0.251002	transmembrane protein with EGF-like and two follistatin-like domains 1 [Source:MGI Symbol;Acc:MGI:1926810]
Tmem50a	ENSMUSG00000028822.8	12555.5	14072.6	12746.6	13422.8	15258.2	15322.1	13983.1	-0.171948	0.019522	0.251002	transmembrane protein 50A [Source:MGI Symbol;Acc:MGI:1919067]
Zhx1	ENSMUSG00000022361.11	4122.77	4217.03	5165.16	4821.22	4013.52	3734.41	3940.43	0.217535	0.0195222	0.251002	zinc fingers and homeoboxes 1 [Source:MGI Symbol;Acc:MGI:109271]
Atp10a	ENSMUSG00000025324.7	1804.61	1669.5	1626.03	1503.85	1896.1	1930.28	1912.23	-0.209674	0.0195382	0.251002	ATPase, class V, type 10A [Source:MGI Symbol;Acc:MGI:1330809]
Tmem87b	ENSMUSG00000014353.11	2471.62	2426.95	2529.62	2450.68	2168.91	1907.25	2325.11	0.198349	0.0195442	0.251002	transmembrane protein 87B [Source:MGI Symbol;Acc:MGI:1919727]
Kif26a	ENSMUSG00000021294.7	149.361	195.44	1123.92	256.248	205.057	46.0544	114.121	0.512458	0.0195487	0.251002	kinesin family member 26A [Source:MGI Symbol;Acc:MGI:2447072]
Ap2s1	ENSMUSG00000008036.10	3008.7	3326.37	3014.78	2812.79	3608.82	3973.69	3228.8	-0.238873	0.0195884	0.251247	adaptor-related protein complex 2, sigma 1 subunit [Source:MGI Symbol;Acc:MGI:2141861]
Cd3d	ENSMUSG00000032094.7	113.555	117.653	294.486	175.119	236.674	141.167	1072.55	-0.531358	0.0196128	0.251274	CD3 antigen, delta polypeptide [Source:MGI Symbol;Acc:MGI:88331]
Fdft1	ENSMUSG00000021273.9	925.833	1004.42	1220.32	791.499	1271.9	1208.43	1298.94	-0.327014	0.0196318	0.251274	farnesyl diphosphate farnesyl transferase 1 [Source:MGI Symbol;Acc:MGI:102706]
Impdh1	ENSMUSG00000003500.10	7307.43	7484.08	11349.4	8138.59	6951.16	6432.6	6594.91	0.321806	0.0197238	0.252187	inosine 5'-phosphate dehydrogenase 1 [Source:MGI Symbol;Acc:MGI:96567]
Pip4k2a	ENSMUSG00000026737.9	6564.72	6058.63	6575.09	6386.41	6846.38	6860.1	7852.1	-0.169333	0.0197956	0.25284	phosphatidylinositol-5-phosphate 4-kinase, type II, alpha [Source:MGI Symbol;Acc:MGI:1298206]
Arl8a	ENSMUSG00000026426.7	9434.29	9083.57	8513.62	9079.49	7836.43	8430.96	7601.59	0.172492	0.0198625	0.253428	ADP-ribosylation factor-like 8A [Source:MGI Symbol;Acc:MGI:1915974]
Gars	ENSMUSG00000029777.9	10126.9	9964.51	9333.52	10802	8880.69	9147.81	8312.3	0.184862	0.0198875	0.253435	glycyl-tRNA synthetase [Source:MGI Symbol;Acc:MGI:2449057]
9130011E15Rik	ENSMUSG00000039901.9	1095.65	870.242	1059.3	1009.16	827.455	825.976	848.951	0.252925	0.0199046	0.253435	RIKEN cDNA 9130011E15 gene [Source:MGI Symbol;Acc:MGI:1918867]
Clec5a	ENSMUSG00000029915.11	20.4604	36.9488	29.6605	67.2774	146.34	30.0355	156.801	-0.52378	0.0199207	NA	C-type lectin domain family 5, member a [Source:MGI Symbol;Acc:MGI:1345151]
Btg3	ENSMUSG00000022863.11	3416.89	2954.93	3595.27	3149.18	2485.08	3084.64	2562.63	0.253085	0.0199361	0.253571	B cell translocation gene 3 [Source:MGI Symbol;Acc:MGI:109532]
Zbtb44	ENSMUSG00000047412.12	3319.7	3350.67	3241.47	3435.11	3030.69	3057.61	2834.48	0.156923	0.0199729	0.253775	zinc finger and BTB domain containing 44 [Source:MGI Symbol;Acc:MGI:1925123]
Fam43a	ENSMUSG00000046546.3	2191.31	1588.8	3534.89	1676	1206.86	1303.54	1775.84	0.480217	0.0200037	0.253867	family with sequence similarity 43, member A [Source:MGI Symbol;Acc:MGI:2676309]
Tmem44	ENSMUSG00000022537.14	232.225	451.164	1687.47	522.39	355.914	221.261	277.417	0.546061	0.0200218	0.253867	transmembrane protein 44 [Source:MGI Symbol;Acc:MGI:1924489]
Cltb	ENSMUSG00000047547.11	2349.88	2491.13	3226.64	2440.79	2034.31	2196.6	2183.15	0.270843	0.0200657	0.254159	clathrin, light polypeptide (Lcb) [Source:MGI Symbol;Acc:MGI:1921575]
Isoc2b	ENSMUSG00000052605.8	68.5423	76.8146	58.2617	56.3943	129.177	98.1159	89.0703	-0.500646	0.0200878	0.254174	isochorismatase domain containing 2b [Source:MGI Symbol;Acc:MGI:1914691]
Rpp40	ENSMUSG00000021418.12	114.578	89.455	91.1001	112.789	142.727	130.154	199.48	-0.475561	0.0201548	0.254757	ribonuclease P 40 subunit [Source:MGI Symbol;Acc:MGI:1346084]
mt-Rnr2	ENSMUSG00000064339.1	74053.3	86113.1	100223	75846.4	93472.6	94121.2	135802	-0.32888	0.0202006	0.255072	mitochondrially encoded 16S rRNA [Source:MGI Symbol;Acc:MGI:102492]
Mthfsl	ENSMUSG00000079427.7	1187.73	1032.62	959.729	1012.13	1320.68	1334.58	1168.12	-0.269022	0.0203219	0.256338	5, 10-methenyltetrahydrofolate synthetase-like [Source:MGI Symbol;Acc:MGI:3780550]
Asb8	ENSMUSG00000048175.10	2003.07	1961.2	2090	2196.41	2532.05	2387.82	2194.28	-0.200546	0.0203851	0.256865	ankyrin repeat and SOCS box-containing 8 [Source:MGI Symbol;Acc:MGI:1925791]
Mboat1	ENSMUSG00000038732.11	67.5193	74.87	222.454	168.194	271.904	139.164	553.906	-0.543333	0.0204167	0.256865	membrane bound O-acyltransferase domain containing 1 [Source:MGI Symbol;Acc:MGI:2387184]
Gm21769	ENSMUSG00000094614.1	1108.95	754.534	819.901	796.446	636.851	550.651	734.83	0.377266	0.0204349	0.256865	predicted gene, 21769 [Source:MGI Symbol;Acc:MGI:5433933]
Znfx1	ENSMUSG00000039501.11	5032.23	5004.62	5210.71	4195.94	4485.96	3861.56	3850.43	0.238616	0.020448	0.256865	zinc finger, NFX1-type containing 1 [Source:MGI Symbol;Acc:MGI:2138982]
Dhx33	ENSMUSG00000040620.12	4395.92	3930.19	3460.74	3841.74	3120.12	3405.02	3316.01	0.2359	0.0204998	0.257251	DEAH (Asp-Glu-Ala-His) box polypeptide 33 [Source:MGI Symbol;Acc:MGI:2445102]
Mxd1	ENSMUSG00000001156.7	25288	17616.8	19410.7	16464.2	13433.5	16564.6	15641.1	0.330778	0.0205331	0.257255	MAX dimerization protein 1 [Source:MGI Symbol;Acc:MGI:96908]
Wdr34	ENSMUSG00000039715.8	53.197	77.787	97.4559	57.3837	167.117	104.123	106.699	-0.529017	0.0205424	0.257255	WD repeat domain 34 [Source:MGI Symbol;Acc:MGI:1919070]
Mapkapk3	ENSMUSG00000032577.13	2615.86	2840.2	2365.42	2683.18	3199.61	3095.66	2895.71	-0.218104	0.02059	0.257348	mitogen-activated protein kinase-activated protein kinase 3 [Source:MGI Symbol;Acc:MGI:2143163]
Ap1s3	ENSMUSG00000054702.11	81.8416	45.6999	62.4989	68.2668	103.884	114.135	99.2763	-0.503489	0.020592	0.257348	adaptor-related protein complex AP-1, sigma 3 [Source:MGI Symbol;Acc:MGI:1891304]
Gaa	ENSMUSG00000025579.11	2283.38	2299.58	3305.03	2612.94	2023.47	1738.05	2305.62	0.331353	0.0206395	0.257676	glucosidase, alpha, acid [Source:MGI Symbol;Acc:MGI:95609]
Ercc6l2	ENSMUSG00000021470.14	1415.86	1303.9	1374.98	1527.59	1231.25	1178.39	1212.65	0.205679	0.0206629	0.257704	excision repair cross-complementing rodent repair deficiency, complementation group 6 like 2 [Source:MGI Symbol;Acc:MGI:1923501]
Rpl11	ENSMUSG00000059291.12	2627.11	2849.92	2593.17	2557.53	2984.62	2883.41	3084.99	-0.168787	0.0207391	0.257717	ribosomal protein L11 [Source:MGI Symbol;Acc:MGI:1914275]
Lrmp	ENSMUSG00000030263.10	16206.7	16135.9	12745.5	16795.6	18129	19774.4	17953.2	-0.255969	0.0207409	0.257717	lymphoid-restricted membrane protein [Source:MGI Symbol;Acc:MGI:108424]
1110059G10Rik	ENSMUSG00000032551.6	1015.86	911.08	1063.54	938.916	872.622	798.944	817.405	0.226236	0.020743	0.257717	RIKEN cDNA 1110059G10 gene [Source:MGI Symbol;Acc:MGI:1913452]
Iqcc	ENSMUSG00000040795.9	554.477	679.664	673.717	644.083	780.482	729.862	789.571	-0.255758	0.0207485	0.257717	IQ motif containing C [Source:MGI Symbol;Acc:MGI:2446212]
Dync1li2	ENSMUSG00000035770.7	3926.35	3685.16	5139.74	3978.27	3530.23	3330.94	3413.43	0.263154	0.020819	0.25833	dynein, cytoplasmic 1 light intermediate chain 2 [Source:MGI Symbol;Acc:MGI:107738]
Man2a2	ENSMUSG00000038886.9	2002.05	2185.81	2348.47	1964.9	2649.48	2139.53	3604.56	-0.354296	0.0209208	0.259328	mannosidase 2, alpha 2 [Source:MGI Symbol;Acc:MGI:2150656]
Dpysl5	ENSMUSG00000029168.11	186.19	180.855	324.147	332.43	398.371	341.403	475.042	-0.488214	0.0209903	0.259812	dihydropyrimidinase-like 5 [Source:MGI Symbol;Acc:MGI:1929772]
Kifc1	ENSMUSG00000079553.7	28.6445	62.2296	91.1001	31.66	112.917	108.128	115.977	-0.547729	0.0210024	0.259812	kinesin family member C1 [Source:MGI Symbol;Acc:MGI:109596]
Spidr	ENSMUSG00000041974.9	2746.81	2366.67	2792.32	3013.63	2348.67	2378.81	2141.4	0.235264	0.0210627	0.26005	scaffolding protein involved in DNA repair [Source:MGI Symbol;Acc:MGI:1924834]
Clta	ENSMUSG00000028478.15	3328.91	3834.9	3558.2	3350.02	4053.26	4070.81	3834.66	-0.181035	0.0210644	0.26005	clathrin, light polypeptide (Lca) [Source:MGI Symbol;Acc:MGI:894297]
Mrpl30	ENSMUSG00000026087.8	1224.55	1222.23	1156.76	1167.46	1403.78	1314.55	1345.33	-0.183631	0.0211965	0.261167	mitochondrial ribosomal protein L30 [Source:MGI Symbol;Acc:MGI:1333820]
Rhob	ENSMUSG00000054364.4	29439.4	23044.4	26404.2	21113.2	16318.7	23132.3	19010	0.320175	0.0211977	0.261167	ras homolog gene family, member B [Source:MGI Symbol;Acc:MGI:107949]
H2afy2	ENSMUSG00000020086.6	51.151	98.2061	270.122	107.842	55.1034	17.0201	59.3802	0.522333	0.0212956	0.262021	H2A histone family, member Y2 [Source:MGI Symbol;Acc:MGI:3037658]
Rpusd3	ENSMUSG00000051169.11	378.517	368.516	341.096	437.303	458.894	467.552	521.432	-0.313157	0.02131	0.262021	RNA pseudouridylate synthase domain containing 3 [Source:MGI Symbol;Acc:MGI:2141440]
Sgk1	ENSMUSG00000019970.12	43719.8	34513.1	42775.7	38106.7	26206.7	34512.8	35613.3	0.281705	0.0213841	0.262667	serum/glucocorticoid regulated kinase 1 [Source:MGI Symbol;Acc:MGI:1340062]
Synm	ENSMUSG00000030554.12	182.097	363.654	1410.99	485.783	177.054	159.188	345.147	0.533879	0.0214156	0.262754	synemin, intermediate filament protein [Source:MGI Symbol;Acc:MGI:2661187]
Tspan8	ENSMUSG00000034127.11	235.295	606.738	1662.05	661.891	451.668	250.296	297.829	0.54365	0.0214344	0.262754	tetraspanin 8 [Source:MGI Symbol;Acc:MGI:2384918]
Trem3	ENSMUSG00000041754.5	8.18416	15.5574	4.23721	18.7981	45.1668	6.0071	120.616	-0.434176	0.0214551	NA	triggering receptor expressed on myeloid cells 3 [Source:MGI Symbol;Acc:MGI:1930003]
Eaf1	ENSMUSG00000021890.5	5239.91	4736.25	5127.03	4944.89	4565.46	4567.4	4157.54	0.167672	0.0215349	0.263219	ELL associated factor 1 [Source:MGI Symbol;Acc:MGI:1921677]
Slc16a3	ENSMUSG00000025161.13	481.842	547.426	513.762	498.645	738.025	477.564	1148.64	-0.47293	0.0215359	0.263219	solute carrier family 16 (monocarboxylic acid transporters), member 3 [Source:MGI Symbol;Acc:MGI:1933438]
Rhbdd1	ENSMUSG00000026142.12	3360.62	3075.5	3593.16	3926.83	3137.28	2826.34	2838.19	0.231868	0.0215371	0.263219	rhomboid domain containing 1 [Source:MGI Symbol;Acc:MGI:1924117]
Lgals1	ENSMUSG00000068220.5	21568.3	24094.5	19801.6	19275	28091	28778	21531.8	-0.28597	0.0216203	0.263971	lectin, galactose binding, soluble 1 [Source:MGI Symbol;Acc:MGI:96777]
Glb1l2	ENSMUSG00000036395.11	111.509	241.14	1235.15	417.516	190.604	93.11	198.553	0.515857	0.0217569	0.26519	galactosidase, beta 1-like 2 [Source:MGI Symbol;Acc:MGI:2388283]
Bbc3	ENSMUSG00000002083.9	7502.83	6330.89	5963.88	5639.43	4560.04	6007.1	4246.61	0.324182	0.0217636	0.26519	BCL2 binding component 3 [Source:MGI Symbol;Acc:MGI:2181667]
Fh1	ENSMUSG00000026526.11	3271.62	3404.15	3396.13	3357.94	3758.78	3521.16	3700.13	-0.128611	0.0218378	0.265675	fumarate hydratase 1 [Source:MGI Symbol;Acc:MGI:95530]
F13a1	ENSMUSG00000039109.12	147.315	145.851	480.924	401.686	2189.68	346.409	610.503	-0.476699	0.0218471	0.265675	coagulation factor XIII, A1 subunit [Source:MGI Symbol;Acc:MGI:1921395]
2310001H17Rik	ENSMUSG00000097354.4	828.646	904.274	670.539	861.745	1070.45	1019.2	973.278	-0.299953	0.0220277	0.267605	RIKEN cDNA 2310001H17 gene [Source:MGI Symbol;Acc:MGI:1923682]
Mef2a	ENSMUSG00000030557.13	11218.4	9347.08	11039	10579.4	9126.4	9292.98	9335.68	0.177833	0.0221086	0.26832	myocyte enhancer factor 2A [Source:MGI Symbol;Acc:MGI:99532]
Zhx3	ENSMUSG00000035877.14	926.856	949.974	1523.28	934.959	736.218	643.761	904.62	0.412456	0.0222526	0.269553	zinc fingers and homeoboxes 3 [Source:MGI Symbol;Acc:MGI:2444772]
Hmgn2	ENSMUSG00000003038.12	1886.45	1792.02	1936.41	2012.39	2072.25	2107.49	2736.13	-0.261538	0.0222544	0.269553	high mobility group nucleosomal binding domain 2 [Source:MGI Symbol;Acc:MGI:96136]
Wiz	ENSMUSG00000024050.12	2436.83	2129.42	2093.18	2231.04	1867.19	1987.35	1882.54	0.204064	0.0222932	0.269585	widely-interspaced zinc finger motifs [Source:MGI Symbol;Acc:MGI:1332638]
Dcun1d5	ENSMUSG00000032002.9	5187.73	5075.6	5255.2	4578.82	5756.95	6339.49	5310.82	-0.206068	0.0223014	0.269585	DCN1, defective in cullin neddylation 1, domain containing 5 (S. cerevisiae) [Source:MGI Symbol;Acc:MGI:1924113]
Sema4c	ENSMUSG00000026121.10	4899.24	3932.13	4208.61	3385.64	3102.05	3606.26	3103.54	0.29644	0.0223317	0.269685	sema domain, immunoglobulin domain (Ig), transmembrane domain (TM) and short cytoplasmic domain, (semaphorin) 4C [Source:MGI Symbol;Acc:MGI:109252]
Retnla	ENSMUSG00000061100.3	0	9.72337	33.8977	3.9575	56.0068	90.1065	64.0193	-0.404399	0.0223478	NA	resistin like alpha [Source:MGI Symbol;Acc:MGI:1888504]
Tbc1d12	ENSMUSG00000048720.7	625.065	611.6	919.475	618.359	472.444	550.651	517.721	0.368215	0.0224273	0.270316	TBC1D12: TBC1 domain family, member 12 [Source:MGI Symbol;Acc:MGI:2384803]
Ikzf2	ENSMUSG00000025997.10	349.873	347.124	227.75	352.217	429.084	396.468	552.978	-0.426669	0.0224283	0.270316	IKAROS family zinc finger 2 [Source:MGI Symbol;Acc:MGI:1342541]
Mtfr1	ENSMUSG00000027601.10	2516.63	2945.21	2719.23	2793	2361.32	2475.93	2365	0.181451	0.0224664	0.270345	mitochondrial fission regulator 1 [Source:MGI Symbol;Acc:MGI:1914722]
Brd1	ENSMUSG00000022387.13	4432.74	2566.97	4994.61	2283.48	5467.89	6163.28	4576.91	-0.462335	0.0224956	0.270345	bromodomain containing 1 [Source:MGI Symbol;Acc:MGI:1924161]
Hadhb	ENSMUSG00000059447.10	7738.12	7763.14	7679.95	8765.86	9051.42	9082.73	8732.6	-0.16675	0.0225123	0.270345	hydroxyacyl-Coenzyme A dehydrogenase/3-ketoacyl-Coenzyme A thiolase/enoyl-Coenzyme A hydratase (trifunctional protein), beta subunit [Source:MGI Symbol;Acc:MGI:2136381]
Cd247	ENSMUSG00000005763.12	12835.8	13052.7	10835.6	11995.2	14109.2	15902.8	13175	-0.234138	0.0225195	0.270345	CD247 antigen [Source:MGI Symbol;Acc:MGI:88334]
Glipr2	ENSMUSG00000028480.11	8277.25	8337.79	6485.05	8118.8	9254.67	9656.41	9027.65	-0.245185	0.0226038	0.27109	GLI pathogenesis-related 2 [Source:MGI Symbol;Acc:MGI:1917770]
Nol6	ENSMUSG00000028430.11	4914.59	4612.77	4086.79	4723.27	4158.05	3755.44	3834.66	0.213366	0.022779	0.272923	nucleolar protein family 6 (RNA-associated) [Source:MGI Symbol;Acc:MGI:2140151]
Ebp	ENSMUSG00000031168.11	2998.47	3264.14	3074.1	2817.74	3739.81	3531.17	3228.8	-0.202464	0.0229306	0.274378	phenylalkylamine Ca2+ antagonist (emopamil) binding protein [Source:MGI Symbol;Acc:MGI:107822]
Dctn6	ENSMUSG00000031516.8	2435.81	2556.27	2185.34	2582.27	2892.48	3114.68	2636.85	-0.23309	0.0229592	0.274378	dynactin 6 [Source:MGI Symbol;Acc:MGI:1343154]
Ambra1	ENSMUSG00000040506.13	4324.3	4035.2	3909.89	4076.22	3428.16	3610.27	3807.75	0.167506	0.022968	0.274378	autophagy/beclin 1 regulator 1 [Source:MGI Symbol;Acc:MGI:2443564]
Pdcl3	ENSMUSG00000026078.7	3268.55	3372.07	3154.6	3204.58	3768.71	3667.33	3444.98	-0.160351	0.0230871	0.275308	phosducin-like 3 [Source:MGI Symbol;Acc:MGI:1916083]
Slc7a5	ENSMUSG00000040010.10	3037.35	2600.03	2115.43	4395.79	2395.64	1667.97	2105.21	0.440138	0.0231415	0.275308	solute carrier family 7 (cationic amino acid transporter, y+ system), member 5 [Source:MGI Symbol;Acc:MGI:1298205]
Rcc1	ENSMUSG00000028896.10	924.81	1082.21	781.766	807.329	1160.79	1085.28	1156.99	-0.309017	0.0231418	0.275308	regulator of chromosome condensation 1 [Source:MGI Symbol;Acc:MGI:1913989]
Eif3f	ENSMUSG00000031029.6	4656.79	4640.97	4365.39	4748.01	4866.27	5141.07	5346.07	-0.154676	0.0231689	0.275308	eukaryotic translation initiation factor 3, subunit F [Source:MGI Symbol;Acc:MGI:1913335]
Ncapg2	ENSMUSG00000042029.6	599.489	409.354	542.363	398.718	598.911	595.704	919.465	-0.43012	0.0231702	0.275308	non-SMC condensin II complex, subunit G2 [Source:MGI Symbol;Acc:MGI:1923294]
Rara	ENSMUSG00000037992.13	3904.87	3900.04	4213.91	3979.26	3670.25	3339.95	3735.39	0.149826	0.0231814	0.275308	retinoic acid receptor, alpha [Source:MGI Symbol;Acc:MGI:97856]
Gmpr2	ENSMUSG00000002326.5	3411.77	3212.6	3224.52	3106.63	2917.77	2958.5	2695.3	0.170563	0.0232402	0.275737	guanosine monophosphate reductase 2 [Source:MGI Symbol;Acc:MGI:1917903]
B3gnt7	ENSMUSG00000079445.3	7770.86	6709.13	5777.44	6574.39	5317.93	6048.15	5019.48	0.27188	0.0232818	0.275962	UDP-GlcNAc:betaGal beta-1,3-N-acetylglucosaminyltransferase 7 [Source:MGI Symbol;Acc:MGI:2384394]
H6pd	ENSMUSG00000028980.11	4229.16	4979.34	4766.86	4436.35	4214.96	3885.59	3974.76	0.181744	0.0233393	0.276375	hexose-6-phosphate dehydrogenase (glucose 1-dehydrogenase) [Source:MGI Symbol;Acc:MGI:2140356]
Ndfip2	ENSMUSG00000053253.13	10793.9	9922.7	10556	11210.6	11279	12419.7	11775.8	-0.157146	0.0233863	0.276627	Nedd4 family interacting protein 2 [Source:MGI Symbol;Acc:MGI:1923523]
Dnajc25	ENSMUSG00000070972.10	824.554	837.182	816.723	688.604	607.041	686.811	655.038	0.262257	0.0234099	0.276627	DnaJ (Hsp40) homolog, subfamily C, member 25 [Source:MGI Symbol;Acc:MGI:1919679]
Fancb	ENSMUSG00000047757.13	262.916	160.436	234.106	253.28	151.76	154.182	160.512	0.432945	0.0234287	0.276627	Fanconi anemia, complementation group B [Source:MGI Symbol;Acc:MGI:2448558]
Epdr1	ENSMUSG00000002808.6	37.8517	68.0636	201.268	76.1818	208.67	158.187	299.684	-0.532272	0.0235109	0.277221	ependymin related protein 1 (zebrafish) [Source:MGI Symbol;Acc:MGI:2145369]
1190002F15Rik	ENSMUSG00000098318.4	17.3913	18.4744	14.8302	17.8087	25.2934	33.039	57.5246	-0.535135	0.0235378	NA	RIKEN cDNA 1190002F15 gene [Source:MGI Symbol;Acc:MGI:1915081]
Zfp180	ENSMUSG00000057101.6	4493.1	3644.32	4268.99	4059.4	3528.43	3529.17	3621.26	0.196712	0.0235592	0.277221	zinc finger protein 180 [Source:MGI Symbol;Acc:MGI:1923701]
Heca	ENSMUSG00000039879.8	6046.05	2801.3	6455.39	3097.73	7203.19	8157.64	6125.44	-0.475571	0.0235659	0.277221	headcase homolog (Drosophila) [Source:MGI Symbol;Acc:MGI:2685715]
Hpgd	ENSMUSG00000031613.8	1685.94	5389.67	16919.2	7820.01	2771.43	1619.91	2648.91	0.49652	0.02357	0.277221	hydroxyprostaglandin dehydrogenase 15 (NAD) [Source:MGI Symbol;Acc:MGI:108085]
Dll4	ENSMUSG00000027314.6	475.704	1433.23	4916.23	1635.44	610.655	430.509	561.328	0.477755	0.0236003	0.277309	delta-like 4 (Drosophila) [Source:MGI Symbol;Acc:MGI:1859388]
Dvl1	ENSMUSG00000029071.13	9845.54	10300	9405.55	9266.48	8619.62	8965.59	8368.9	0.156706	0.0236557	0.277612	dishevelled, dsh homolog 1 (Drosophila) [Source:MGI Symbol;Acc:MGI:94941]
Pde4dip	ENSMUSG00000038170.12	3946.81	3654.04	3863.28	3688.39	3599.79	3209.79	2949.53	0.205133	0.0236716	0.277612	phosphodiesterase 4D interacting protein (myomegalin) [Source:MGI Symbol;Acc:MGI:1891434]
Rfx3	ENSMUSG00000040929.13	1658.31	1233.9	1032.82	1268.38	851.845	1029.22	1024.31	0.364129	0.0236975	0.277648	regulatory factor X, 3 (influences HLA class II expression) [Source:MGI Symbol;Acc:MGI:106582]
Ulk1	ENSMUSG00000029512.8	2983.13	3296.22	3097.4	2968.12	2770.53	2761.26	2739.84	0.153607	0.023742	0.277903	unc-51 like kinase 1 [Source:MGI Symbol;Acc:MGI:1270126]
Arhgef26	ENSMUSG00000036885.11	150.384	213.914	702.318	342.323	177.957	53.0627	179.996	0.52664	0.0238906	0.279373	Rho guanine nucleotide exchange factor (GEF) 26 [Source:MGI Symbol;Acc:MGI:1918053]
Cggbp1	ENSMUSG00000054604.7	8706.92	7526.86	8601.54	8822.25	7490.46	7346.68	7491.18	0.166794	0.0239626	0.279946	CGG triplet repeat binding protein 1 [Source:MGI Symbol;Acc:MGI:2146370]
Clec1a	ENSMUSG00000033082.8	457.29	1769.65	4374.92	2082.63	778.675	402.475	687.511	0.490902	0.0240137	0.28025	C-type lectin domain family 1, member a [Source:MGI Symbol;Acc:MGI:2444151]
Cdkn1a	ENSMUSG00000023067.10	3522.26	2680.73	4445.89	2797.95	2261.05	2534.99	2755.61	0.357272	0.0240502	0.28025	cyclin-dependent kinase inhibitor 1A (P21) [Source:MGI Symbol;Acc:MGI:104556]
Ppip5k1	ENSMUSG00000033526.13	1798.47	1566.44	1586.84	1659.18	1560.06	1275.51	1140.29	0.287776	0.0240576	0.28025	diphosphoinositol pentakisphosphate kinase 1 [Source:MGI Symbol;Acc:MGI:2443281]
Tm7sf3	ENSMUSG00000040234.13	3303.33	3260.25	3778.53	3518.21	2942.16	3139.71	3123.03	0.164842	0.0241106	0.280599	transmembrane 7 superfamily member 3 [Source:MGI Symbol;Acc:MGI:1914873]
Rnf125	ENSMUSG00000033107.5	4746.81	4465.95	5156.69	4383.92	3936.73	4395.19	3810.54	0.19801	0.0241705	0.281028	ring finger protein 125 [Source:MGI Symbol;Acc:MGI:1914914]
Agtrap	ENSMUSG00000029007.8	6859.35	6684.82	5718.12	6498.21	5610.61	5779.83	4944.33	0.225922	0.0243211	0.28236	angiotensin II, type I receptor-associated protein [Source:MGI Symbol;Acc:MGI:1339977]
Trim58	ENSMUSG00000037124.6	85.9336	97.2337	98.5152	104.874	72.2668	61.0722	58.4524	0.451292	0.0243314	0.28236	tripartite motif-containing 58 [Source:MGI Symbol;Acc:MGI:2684862]
Gpx8	ENSMUSG00000021760.3	3318.68	3903.93	3294.43	3391.57	3035.21	3074.63	2325.11	0.278257	0.0244161	0.283073	glutathione peroxidase 8 (putative) [Source:MGI Symbol;Acc:MGI:1916840]
Ikbip	ENSMUSG00000019975.8	932.994	834.265	848.502	924.075	981.925	1014.2	1115.23	-0.223172	0.0246149	0.284851	IKBKB interacting protein [Source:MGI Symbol;Acc:MGI:1914704]
Sec24d	ENSMUSG00000039234.8	3976.48	3692.94	3941.67	3616.16	4146.31	4236	4186.3	-0.141588	0.0246162	0.284851	Sec24 related gene family, member D (S. cerevisiae) [Source:MGI Symbol;Acc:MGI:1916858]
Rhov	ENSMUSG00000034226.7	8.18416	11.668	27.5419	15.83	37.9401	8.00946	162.368	-0.432017	0.0246946	NA	ras homolog gene family, member V [Source:MGI Symbol;Acc:MGI:2444227]
Ttc3	ENSMUSG00000040785.14	4738.63	4190.77	4685.3	4255.3	4782.26	5152.09	5093.71	-0.166773	0.0246973	0.285519	tetratricopeptide repeat domain 3 [Source:MGI Symbol;Acc:MGI:1276539]
AA474331	ENSMUSG00000096687.4	183.121	169.187	176.904	189.96	379.401	202.239	235.665	-0.458505	0.0248545	0.286604	expressed sequence AA474331 [Source:MGI Symbol;Acc:MGI:3035041]
Klrb1a	ENSMUSG00000030361.13	7396.43	8974.67	6638.65	8364.17	10369.4	10011.8	8495.08	-0.278462	0.0248573	0.286604	killer cell lectin-like receptor subfamily B member 1A [Source:MGI Symbol;Acc:MGI:107540]
Setbp1	ENSMUSG00000024548.11	447.06	351.014	382.408	475.889	615.171	530.627	485.248	-0.349828	0.0248618	0.286604	SET binding protein 1 [Source:MGI Symbol;Acc:MGI:1933199]
Acad10	ENSMUSG00000029456.9	502.303	568.817	658.887	650.019	479.671	468.554	481.536	0.28814	0.0248884	0.28664	acyl-Coenzyme A dehydrogenase family, member 10 [Source:MGI Symbol;Acc:MGI:1919235]
Chdh	ENSMUSG00000015970.15	10.2302	14.5851	45.55	13.8512	62.3301	46.0544	57.5246	-0.511165	0.0249104	NA	choline dehydrogenase [Source:MGI Symbol;Acc:MGI:1860776]
Atxn7l3b	ENSMUSG00000074748.3	2712.02	2928.68	3067.74	2963.18	2627.8	2674.16	2412.32	0.171125	0.0249825	0.287211	ataxin 7-like 3B [Source:MGI Symbol;Acc:MGI:1914971]
Scamp2	ENSMUSG00000040188.9	5567.27	5722.2	5089.95	5811.58	6214.95	6492.67	6068.84	-0.174213	0.0249879	0.287211	secretory carrier membrane protein 2 [Source:MGI Symbol;Acc:MGI:1346518]
Phgdh	ENSMUSG00000053398.8	2192.33	2347.22	2124.96	2373.51	2428.16	2523.98	3112.82	-0.241257	0.0250093	0.287211	3-phosphoglycerate dehydrogenase [Source:MGI Symbol;Acc:MGI:1355330]
Fam102a	ENSMUSG00000039157.9	7116.12	7058.2	6750.94	6791.06	7581.69	7260.58	8768.78	-0.182871	0.0250323	0.287211	family with sequence similarity 102, member A [Source:MGI Symbol;Acc:MGI:2138935]
Ppa1	ENSMUSG00000020089.8	904.349	1008.31	962.906	891.426	1231.25	973.15	1204.3	-0.259306	0.0251025	0.287477	pyrophosphatase (inorganic) 1 [Source:MGI Symbol;Acc:MGI:97831]
Klrb1b	ENSMUSG00000079298.6	3494.63	3404.15	2758.43	3615.17	4356.79	4458.27	3519.2	-0.289103	0.0251026	0.287477	killer cell lectin-like receptor subfamily B member 1B [Source:MGI Symbol;Acc:MGI:107539]
Snrpn	ENSMUSG00000102252.2	62.4042	120.57	206.564	76.1818	53.2968	50.0591	60.308	0.531411	0.0251441	0.287681	NA
Hacd2	ENSMUSG00000035376.9	1883.38	1827.02	1783.87	1588.93	2178.84	2339.76	1855.63	-0.252835	0.0252102	0.288167	protein tyrosine phosphatase-like (proline instead of catalytic arginine), member b [Source:MGI Symbol;Acc:MGI:1918007]
Rassf5	ENSMUSG00000026430.12	21847.6	22062.3	19972.1	21592.1	24436.1	24386.8	22635.9	-0.15841	0.0252361	0.288193	Ras association (RalGDS/AF-6) domain family member 5 [Source:MGI Symbol;Acc:MGI:1926375]
Nmral1	ENSMUSG00000063445.11	152.43	166.27	199.149	138.512	289.067	168.199	295.045	-0.462592	0.0252784	0.288297	NmrA-like family domain containing 1 [Source:MGI Symbol;Acc:MGI:1915074]
2810013P06Rik	ENSMUSG00000099881.1	2545.27	2734.21	2303.98	2504.11	1941.27	2296.71	2172.94	0.223479	0.0252925	0.288297	NA
Maf	ENSMUSG00000055435.6	484.911	562.011	503.169	525.358	571.811	660.781	645.76	-0.258365	0.0253393	0.28856	avian musculoaponeurotic fibrosarcoma (v-maf) AS42 oncogene homolog [Source:MGI Symbol;Acc:MGI:96909]
Abcb8	ENSMUSG00000028973.15	540.154	663.134	575.202	587.688	758.802	624.738	886.992	-0.323215	0.025372	0.288662	ATP-binding cassette, sub-family B (MDR/TAP), member 8 [Source:MGI Symbol;Acc:MGI:1351667]
Txndc11	ENSMUSG00000022498.13	7410.75	7124.32	7123.81	6328.04	6184.23	6135.25	6279.46	0.164686	0.0254364	0.289126	thioredoxin domain containing 11 [Source:MGI Symbol;Acc:MGI:1923620]
Ptprb	ENSMUSG00000020154.9	2027.62	5042.54	21222.1	6101.47	2702.78	1226.45	2156.24	0.461377	0.0254637	0.289166	protein tyrosine phosphatase, receptor type, B [Source:MGI Symbol;Acc:MGI:97809]
Smim7	ENSMUSG00000044600.11	3836.32	3506.25	3930.01	3589.45	2968.36	3452.08	3319.72	0.182894	0.0254978	0.289283	small integral membrane protein 7 [Source:MGI Symbol;Acc:MGI:1914068]
Stag1	ENSMUSG00000037286.12	7583.64	5975.01	6558.15	6518.99	5478.73	5329.3	6115.23	0.223445	0.0256023	0.290199	stromal antigen 1 [Source:MGI Symbol;Acc:MGI:1098658]
H2-T22	ENSMUSG00000056116.15	3467.01	3690.99	3598.45	3484.58	3719.93	3909.62	4201.15	-0.149821	0.0256506	0.290199	histocompatibility 2, T region locus 22 [Source:MGI Symbol;Acc:MGI:95956]
Csf2rb	ENSMUSG00000071713.4	85.9336	239.195	644.056	443.24	1348.68	435.515	1733.16	-0.469884	0.0257158	0.290199	colony stimulating factor 2 receptor, beta, low-affinity (granulocyte-macrophage) [Source:MGI Symbol;Acc:MGI:1339759]
Ephb6	ENSMUSG00000029869.7	1889.52	1706.45	1577.3	1806.6	1485.99	1558.84	1271.11	0.25613	0.0257168	0.290199	Eph receptor B6 [Source:MGI Symbol;Acc:MGI:1096338]
Smagp	ENSMUSG00000053559.9	139.131	303.369	1280.7	372.994	213.187	157.186	214.325	0.514556	0.025721	0.290199	small cell adhesion glycoprotein [Source:MGI Symbol;Acc:MGI:2448476]
Sytl2	ENSMUSG00000030616.11	13305.4	11797.4	11272	12292	10828.3	10589.5	10668	0.175826	0.0257686	0.290199	synaptotagmin-like 2 [Source:MGI Symbol;Acc:MGI:1933366]
Prmt3	ENSMUSG00000030505.13	2665.99	2390.98	2619.66	2769.26	2282.73	2075.45	2415.1	0.196933	0.0257757	0.290199	protein arginine N-methyltransferase 3 [Source:MGI Symbol;Acc:MGI:1919224]
Fam169b	ENSMUSG00000074071.6	255.755	224.61	294.486	333.419	341.461	312.369	719.985	-0.494759	0.0258033	0.290199	family with sequence similarity 169, member B [Source:MGI Symbol;Acc:MGI:3644026]
Dcaf6	ENSMUSG00000026571.9	1215.35	1103.6	1163.11	1258.48	972.892	1051.24	1040.08	0.201297	0.0258197	0.290199	DDB1 and CUL4 associated factor 6 [Source:MGI Symbol;Acc:MGI:1921356]
Rufy1	ENSMUSG00000020375.6	3481.34	3398.32	3492.52	2754.42	2908.74	2750.25	2552.42	0.241261	0.0258299	0.290199	RUN and FYVE domain containing 1 [Source:MGI Symbol;Acc:MGI:2429762]
Adap1	ENSMUSG00000056413.13	2487.98	2419.18	2209.71	2557.53	2785.89	2704.19	2751.9	-0.183017	0.0258568	0.290199	ArfGAP with dual PH domains 1 [Source:MGI Symbol;Acc:MGI:2442201]
Coro1c	ENSMUSG00000004530.9	6429.68	6573.97	7585.67	6572.41	6316.12	5699.73	5878.64	0.174919	0.0258642	0.290199	coronin, actin binding protein 1C [Source:MGI Symbol;Acc:MGI:1345964]
1600012H06Rik	ENSMUSG00000050088.9	1897.7	2169.28	2440.63	2213.23	1897.91	1910.26	1691.41	0.230538	0.025944	0.290589	RIKEN cDNA 1600012H06 gene [Source:MGI Symbol;Acc:MGI:1915162]
Ccsap	ENSMUSG00000031971.12	464.451	496.864	372.875	429.388	520.321	561.664	595.658	-0.312904	0.0259594	0.290589	centriole, cilia and spindle associated protein [Source:MGI Symbol;Acc:MGI:1920670]
Coq10b	ENSMUSG00000025981.10	5237.86	3386.65	4318.78	3686.41	2528.44	3395.01	3489.51	0.350633	0.0259706	0.290589	coenzyme Q10 homolog B (S. cerevisiae) [Source:MGI Symbol;Acc:MGI:1915126]
Myct1	ENSMUSG00000046916.8	298.722	692.304	2642.96	801.393	341.461	251.297	350.714	0.480546	0.0260258	0.290714	myc target 1 [Source:MGI Symbol;Acc:MGI:1915882]
Ppapdc2	ENSMUSG00000040105.3	1776.99	1917.45	2019.03	1974.79	1803.06	1611.9	1553.16	0.200282	0.0260382	0.290714	phosphatidic acid phosphatase type 2 domain containing 2 [Source:MGI Symbol;Acc:MGI:1921661]
Rnf141	ENSMUSG00000030788.12	1345.27	1535.32	4509.45	2284.47	1364.94	1367.62	1412.14	0.506434	0.0260534	0.290714	ring finger protein 141 [Source:MGI Symbol;Acc:MGI:1914400]
Ikbke	ENSMUSG00000042349.10	3987.73	3823.23	3168.38	3625.07	3933.12	4268.04	5167	-0.27039	0.0261503	0.291529	inhibitor of kappaB kinase epsilon [Source:MGI Symbol;Acc:MGI:1929612]
Anxa2	ENSMUSG00000032231.11	65506	63676.4	59686.4	58450.2	68830.5	81066.8	65344.2	-0.211146	0.0262534	0.292411	annexin A2 [Source:MGI Symbol;Acc:MGI:88246]
Gins2	ENSMUSG00000031821.8	84.9106	70.9806	98.5152	88.0543	112.014	119.141	148.45	-0.441525	0.0263545	0.29309	GINS complex subunit 2 (Psf2 homolog) [Source:MGI Symbol;Acc:MGI:1921019]
AU019823	ENSMUSG00000059820.11	1768.8	1724.93	1586.84	1757.13	1551.03	1472.74	1421.41	0.193857	0.0263625	0.29309	expressed sequence AU019823 [Source:MGI Symbol;Acc:MGI:2143205]
Mob4	ENSMUSG00000025979.10	6524.82	6284.22	6994.58	6452.7	5962.01	6057.16	6003.89	0.119839	0.0265357	0.294284	MOB family member 4, phocein [Source:MGI Symbol;Acc:MGI:104899]
Nisch	ENSMUSG00000021910.12	14562.7	13288.9	15142.7	13053.8	11601.5	11996.2	13305.8	0.176748	0.0265551	0.294284	nischarin [Source:MGI Symbol;Acc:MGI:1928323]
Fosb	ENSMUSG00000003545.2	1874.17	1414.75	1766.92	1155.59	1675.69	2024.39	2877.16	-0.40922	0.0265551	0.294284	FBJ osteosarcoma oncogene B [Source:MGI Symbol;Acc:MGI:95575]
S100a10	ENSMUSG00000041959.11	10598.5	11868.3	9943.68	9493.05	13154.4	13008.4	11059.6	-0.236575	0.0265687	0.294284	S100 calcium binding protein A10 (calpactin) [Source:MGI Symbol;Acc:MGI:1339468]
Brca1	ENSMUSG00000017146.9	214.834	370.461	234.106	292.855	395.661	332.393	528.855	-0.451054	0.0266315	0.294284	breast cancer 1 [Source:MGI Symbol;Acc:MGI:104537]
Suclg2	ENSMUSG00000061838.5	2293.61	2327.78	2595.29	2318.1	1961.14	2012.38	2267.58	0.184184	0.0266443	0.294284	succinate-Coenzyme A ligase, GDP-forming, beta subunit [Source:MGI Symbol;Acc:MGI:1306824]
Dbp	ENSMUSG00000059824.7	378.517	967.476	1020.11	1043.79	516.708	415.491	591.018	0.494168	0.026654	0.294284	D site albumin promoter binding protein [Source:MGI Symbol;Acc:MGI:94866]
Gm4793	ENSMUSG00000054412.5	204.604	137.1	175.844	222.609	89.4302	157.186	87.2147	0.491598	0.0266631	0.294284	predicted gene 4793 [Source:MGI Symbol;Acc:MGI:3646955]
Igsf6	ENSMUSG00000035004.2	75.7035	117.653	236.225	274.057	494.124	173.205	472.258	-0.524198	0.0267974	0.295362	immunoglobulin superfamily, member 6 [Source:MGI Symbol;Acc:MGI:1891393]
Ccng2	ENSMUSG00000029385.11	9952.96	8362.1	9911.9	10107.4	7186.93	8813.41	8363.33	0.222137	0.0268092	0.295362	cyclin G2 [Source:MGI Symbol;Acc:MGI:1095734]
Pde6d	ENSMUSG00000026239.11	1622.51	1968.01	1666.28	1584.98	2000.89	2234.64	1901.09	-0.248115	0.0268519	0.295539	phosphodiesterase 6D, cGMP-specific, rod, delta [Source:MGI Symbol;Acc:MGI:1270843]
Ccdc85a	ENSMUSG00000032878.13	405.116	732.17	3736.16	1361.38	508.578	192.227	402.672	0.455198	0.0268738	0.295539	coiled-coil domain containing 85A [Source:MGI Symbol;Acc:MGI:2445069]
Ifi27l2a	ENSMUSG00000079017.3	28.6445	45.6999	98.5152	88.0543	175.247	53.0627	271.85	-0.50682	0.0269246	0.295831	interferon, alpha-inducible protein 27 like 2A [Source:MGI Symbol;Acc:MGI:1924183]
Atf3	ENSMUSG00000026628.10	12024.6	7470.47	18259.2	10293.4	6538.34	9073.72	8588.79	0.437636	0.0269731	0.295872	activating transcription factor 3 [Source:MGI Symbol;Acc:MGI:109384]
E330011M16Rik	ENSMUSG00000103030.1	459.336	178.91	270.122	252.29	105.69	181.214	195.769	0.512292	0.0269769	0.295872	NA
Lamb1	ENSMUSG00000002900.12	798.978	877.048	1753.15	1255.52	1848.22	1405.66	2020.78	-0.451128	0.0270257	0.29614	laminin B1 [Source:MGI Symbol;Acc:MGI:96743]
Kctd10	ENSMUSG00000001098.12	5620.47	5875.83	7284.83	5769.04	5210.44	5305.27	5183.71	0.212885	0.02709	0.296578	potassium channel tetramerisation domain containing 10 [Source:MGI Symbol;Acc:MGI:2141207]
Ddx60	ENSMUSG00000037921.11	796.932	773.98	915.238	1095.24	652.208	572.677	800.705	0.350026	0.0271675	0.297144	DEAD (Asp-Glu-Ala-Asp) box polypeptide 60 [Source:MGI Symbol;Acc:MGI:2384570]
Mageh1	ENSMUSG00000047238.4	245.525	240.167	600.625	231.514	209.574	148.175	179.996	0.513683	0.0271905	0.297144	melanoma antigen, family H, 1 [Source:MGI Symbol;Acc:MGI:1922875]
Rpl13	ENSMUSG00000000740.8	10293.6	11880	11139.6	10433.9	11665.7	12021.2	13340.1	-0.174732	0.0274703	0.299837	ribosomal protein L13 [Source:MGI Symbol;Acc:MGI:105922]
Zfp612	ENSMUSG00000044676.9	109.463	95.2891	133.472	108.831	92.1402	35.0414	53.8133	0.514379	0.0274861	0.299837	zinc finger protein 612 [Source:MGI Symbol;Acc:MGI:2443465]
Crym	ENSMUSG00000030905.5	36.8287	81.6763	190.675	71.2349	23.4867	14.0166	55.6689	0.491218	0.0275477	NA	crystallin, mu [Source:MGI Symbol;Acc:MGI:102675]
Gm13012	ENSMUSG00000085823.4	48.0819	71.953	36.0163	84.0968	112.917	112.132	98.3484	-0.51179	0.0276009	0.30082	predicted gene 13012 [Source:MGI Symbol;Acc:MGI:3652270]
4930595D18Rik	ENSMUSG00000083193.1	46.0359	45.6999	47.6686	66.2881	65.0401	112.132	87.2147	-0.501619	0.0276331	NA	RIKEN cDNA 4930595D18 gene [Source:MGI Symbol;Acc:MGI:1925312]
Rps9	ENSMUSG00000006333.11	7213.31	7381.98	7320.84	6617.92	7559.11	7747.15	8830.95	-0.173835	0.0276408	0.300986	ribosomal protein S9 [Source:MGI Symbol;Acc:MGI:1924096]
Gm37494	ENSMUSG00000099697.3	371.356	338.373	437.492	351.228	261.064	272.322	329.375	0.33183	0.0277292	0.301426	NA
Akap10	ENSMUSG00000047804.12	4113.56	3013.27	3823.02	4578.82	2995.46	3087.65	3229.73	0.290279	0.0277307	0.301426	A kinase (PRKA) anchor protein 10 [Source:MGI Symbol;Acc:MGI:1890218]
Ccdc166	ENSMUSG00000098176.1	371.356	483.252	549.778	387.835	591.685	578.684	573.39	-0.337953	0.0278617	0.302354	coiled-coil domain containing 166 [Source:MGI Symbol;Acc:MGI:1925902]
Lats2	ENSMUSG00000021959.12	13524.3	11917.9	14411.8	12023.9	11689.2	11457.5	10493.6	0.195556	0.0278663	0.302354	large tumor suppressor 2 [Source:MGI Symbol;Acc:MGI:1354386]
Ints8	ENSMUSG00000040738.7	7168.3	6564.25	7374.87	7165.05	6139.97	6677.89	6182.96	0.148944	0.0278905	0.302354	integrator complex subunit 8 [Source:MGI Symbol;Acc:MGI:1919906]
Coro2a	ENSMUSG00000028337.11	64.4502	112.791	170.548	103.884	210.477	128.151	290.406	-0.516646	0.0279223	0.302429	coronin, actin binding protein 2A [Source:MGI Symbol;Acc:MGI:1345966]
Acvr2a	ENSMUSG00000052155.5	471.612	561.039	1165.23	515.464	400.177	328.388	486.175	0.489576	0.0281258	0.304363	activin receptor IIA [Source:MGI Symbol;Acc:MGI:102806]
Tmem29	ENSMUSG00000041353.9	434.783	530.896	468.212	510.517	732.605	611.723	528.855	-0.327042	0.0281612	0.304475	transmembrane protein 29 [Source:MGI Symbol;Acc:MGI:1923420]
Nqo2	ENSMUSG00000046949.12	2129.93	1950.51	2183.22	1733.38	2596.19	2483.93	2121.91	-0.253806	0.0282257	0.304564	NAD(P)H dehydrogenase, quinone 2 [Source:MGI Symbol;Acc:MGI:104513]
Ncf1	ENSMUSG00000015950.10	566.753	652.438	841.087	1038.84	1190.6	711.841	1905.73	-0.486943	0.0282376	0.304564	neutrophil cytosolic factor 1 [Source:MGI Symbol;Acc:MGI:97283]
Ern1	ENSMUSG00000020715.6	5758.58	4520.4	4624.92	4274.1	4148.12	3657.32	4031.36	0.258022	0.0282971	0.304564	endoplasmic reticulum (ER) to nucleus signalling 1 [Source:MGI Symbol;Acc:MGI:1930134]
Tbc1d22b	ENSMUSG00000042203.7	4388.75	4266.62	3474.51	4410.63	3640.44	3356.97	3382.82	0.238566	0.0283095	0.304564	TBC1 domain family, member 22B [Source:MGI Symbol;Acc:MGI:2681867]
Tnfsf8	ENSMUSG00000028362.2	24.5525	9.72337	70.9733	11.8725	72.2668	19.0225	284.839	-0.418873	0.0283352	NA	tumor necrosis factor (ligand) superfamily, member 8 [Source:MGI Symbol;Acc:MGI:88328]
Snx14	ENSMUSG00000032422.14	2537.09	2611.7	2814.57	2778.16	2784.98	3066.62	3186.12	-0.167195	0.0283481	0.304564	sorting nexin 14 [Source:MGI Symbol;Acc:MGI:2155664]
Rprml	ENSMUSG00000046215.3	36.8287	154.602	472.449	180.066	88.5268	52.0615	66.8027	0.488778	0.0283512	0.304564	reprimo-like [Source:MGI Symbol;Acc:MGI:2144486]
Prc1	ENSMUSG00000038943.13	971.869	977.199	1010.58	1064.57	1131.88	1083.28	1367.6	-0.238657	0.0283617	0.304564	protein regulator of cytokinesis 1 [Source:MGI Symbol;Acc:MGI:1858961]
Cd72	ENSMUSG00000028459.8	5468.04	5638.58	4316.66	6131.15	6021.63	7226.54	6661.72	-0.280571	0.0283803	0.304564	CD72 antigen [Source:MGI Symbol;Acc:MGI:88345]
Tmem140	ENSMUSG00000057137.6	228.133	309.203	381.349	309.674	224.93	231.273	202.264	0.393371	0.0283943	0.304564	transmembrane protein 140 [Source:MGI Symbol;Acc:MGI:1915737]
Smc6	ENSMUSG00000020608.6	11516.1	10990.3	10433.1	11734	11703.6	12611.9	13352.2	-0.16902	0.0285031	0.305462	structural maintenance of chromosomes 6 [Source:MGI Symbol;Acc:MGI:1914491]
Dtl	ENSMUSG00000037474.10	1001.54	994.701	1244.68	763.797	1047.87	1372.62	1706.25	-0.387301	0.0285495	0.305691	denticleless homolog (Drosophila) [Source:MGI Symbol;Acc:MGI:1924093]
Psap	ENSMUSG00000004207.11	33607.2	34907.9	43424	32984.7	43042.1	39213.3	45187.4	-0.225061	0.0286287	0.306231	prosaposin [Source:MGI Symbol;Acc:MGI:97783]
Tmem57	ENSMUSG00000028826.11	2877.75	2572.8	2553.98	2910.74	2506.76	2289.71	2243.46	0.203635	0.0286502	0.306231	transmembrane protein 57 [Source:MGI Symbol;Acc:MGI:1913396]
Fam208b	ENSMUSG00000033799.9	3648.09	3131.9	3186.38	3436.1	2988.23	2975.52	2392.84	0.245062	0.028702	0.306435	family with sequence similarity 208, member B [Source:MGI Symbol;Acc:MGI:2145274]
Gp5	ENSMUSG00000047953.6	92.0718	46.6722	156.777	81.1287	30.7134	16.0189	63.0915	0.506588	0.0287143	NA	glycoprotein 5 (platelet) [Source:MGI Symbol;Acc:MGI:1096363]
Samd1	ENSMUSG00000079003.1	183.121	202.246	230.928	175.119	226.737	305.361	269.067	-0.372595	0.0287477	0.306435	sterile alpha motif domain containing 1 [Source:MGI Symbol;Acc:MGI:2142433]
Nfam1	ENSMUSG00000058099.12	130.947	210.025	561.431	450.165	849.135	250.296	1259.97	-0.511023	0.0287498	0.306435	Nfat activating molecule with ITAM motif 1 [Source:MGI Symbol;Acc:MGI:1921289]
Enho	ENSMUSG00000028445.7	45.0129	89.455	291.308	100.916	45.1668	27.0319	66.8027	0.495632	0.0287699	0.306435	energy homeostasis associated [Source:MGI Symbol;Acc:MGI:1916888]
Fam71f2	ENSMUSG00000079652.5	31.7136	36.9488	57.2024	29.6812	18.0667	16.0189	21.3398	0.518884	0.028787	NA	family with sequence similarity 71, member F2 [Source:MGI Symbol;Acc:MGI:2141439]
E430018J23Rik	ENSMUSG00000078580.3	231.202	156.546	209.742	231.514	167.117	130.154	130.822	0.420416	0.0289034	0.307587	RIKEN cDNA E430018J23 gene [Source:MGI Symbol;Acc:MGI:2141981]
Ccdc112	ENSMUSG00000071855.4	15.3453	33.0595	27.5419	12.8619	43.3601	47.0556	51.9577	-0.51737	0.0289037	NA	coiled-coil domain containing 112 [Source:MGI Symbol;Acc:MGI:1918800]
Cyp2d22	ENSMUSG00000061740.7	496.165	680.636	1603.78	648.04	526.644	305.361	557.617	0.509891	0.0290409	0.308629	cytochrome P450, family 2, subfamily d, polypeptide 22 [Source:MGI Symbol;Acc:MGI:1929474]
RP23-327M1.1	ENSMUSG00000105509.1	118.67	127.376	122.879	84.0968	151.76	188.222	155.873	-0.429782	0.0290754	0.308629	NA
9130019O22Rik	ENSMUSG00000030823.6	324.297	458.943	453.382	597.582	369.464	294.348	287.623	0.417257	0.0290773	0.308629	RIKEN cDNA 9130019O22 gene [Source:MGI Symbol;Acc:MGI:1926171]
Taok2	ENSMUSG00000059981.8	6409.22	6310.47	7547.53	6168.75	5650.36	5399.38	6143.07	0.191927	0.0291105	0.308713	TAO kinase 2 [Source:MGI Symbol;Acc:MGI:1915919]
Gm10524	ENSMUSG00000097141.2	351.919	163.353	383.468	190.949	457.088	453.536	420.3	-0.483945	0.0292137	0.309538	predicted gene 10524 [Source:MGI Symbol;Acc:MGI:3642791]
Bmp6	ENSMUSG00000039004.5	811.255	1698.67	6810.26	2653.5	1200.53	513.607	795.138	0.464961	0.0293071	0.31008	bone morphogenetic protein 6 [Source:MGI Symbol;Acc:MGI:88182]
Ndufv1	ENSMUSG00000037916.10	3956.02	4179.11	4180.01	4024.77	4482.35	4416.22	4339.39	-0.115883	0.0293157	0.31008	NADH dehydrogenase (ubiquinone) flavoprotein 1 [Source:MGI Symbol;Acc:MGI:107851]
Kpna2	ENSMUSG00000018362.11	1129.41	1444.89	1531.75	1583.99	1965.66	1609.9	1715.53	-0.290081	0.0294124	0.310833	karyopherin (importin) alpha 2 [Source:MGI Symbol;Acc:MGI:103561]
Adnp2	ENSMUSG00000053950.10	2506.4	2420.15	2445.93	2303.26	2310.73	1795.12	2032.84	0.223655	0.0295549	0.311616	ADNP homeobox 2 [Source:MGI Symbol;Acc:MGI:2448562]
Slpi	ENSMUSG00000017002.11	43.9898	88.4827	335.799	169.183	341.461	174.206	755.242	-0.489833	0.0295631	0.311616	secretory leukocyte peptidase inhibitor [Source:MGI Symbol;Acc:MGI:109297]
Mfap1a	ENSMUSG00000068479.5	2463.43	2254.85	2173.69	2396.26	2123.74	1975.33	1978.1	0.185213	0.0295632	0.311616	microfibrillar-associated protein 1A [Source:MGI Symbol;Acc:MGI:1914782]
Sncaip	ENSMUSG00000024534.12	6.13812	93.3444	119.701	68.2668	13.55	8.00946	25.9788	0.436298	0.0296192	NA	synuclein, alpha interacting protein (synphilin) [Source:MGI Symbol;Acc:MGI:1915097]
Mtss1l	ENSMUSG00000033763.11	149.361	306.286	1216.08	396.739	215.897	111.131	263.5	0.501286	0.029644	0.312167	metastasis suppressor 1-like [Source:MGI Symbol;Acc:MGI:3039591]
Meox1	ENSMUSG00000001493.9	63.4272	140.017	737.275	219.641	115.627	46.0544	105.771	0.475581	0.0296667	0.312167	mesenchyme homeobox 1 [Source:MGI Symbol;Acc:MGI:103220]
Kansl2	ENSMUSG00000022992.13	4457.3	4711.95	4549.71	4590.7	4270.07	4204.97	4028.58	0.127349	0.0297421	0.312236	KAT8 regulatory NSL complex subunit 2 [Source:MGI Symbol;Acc:MGI:1916862]
Evi2a	ENSMUSG00000078771.7	1122.25	835.238	981.974	1090.29	1221.31	1178.39	1285.02	-0.269815	0.0297476	0.312236	ecotropic viral integration site 2a [Source:MGI Symbol;Acc:MGI:95458]
Atf4	ENSMUSG00000042406.7	27933.6	24144.1	22471	23184	17999	23586.9	18447.8	0.263138	0.0297501	0.312236	activating transcription factor 4 [Source:MGI Symbol;Acc:MGI:88096]
Rpl23	ENSMUSG00000071415.6	1983.64	2148.87	2169.45	1837.27	2191.49	2329.75	2467.06	-0.193601	0.0298838	0.312603	ribosomal protein L23 [Source:MGI Symbol;Acc:MGI:1929455]
Nbr1	ENSMUSG00000017119.16	8629.17	7600.76	9386.48	8740.13	7633.18	7316.64	7729.63	0.172498	0.0298883	0.312603	neighbor of Brca1 gene 1 [Source:MGI Symbol;Acc:MGI:108498]
1700017B05Rik	ENSMUSG00000032300.6	3498.73	2160.53	2729.82	1858.04	1725.37	1944.3	1909.44	0.381677	0.0299596	0.312603	RIKEN cDNA 1700017B05 gene [Source:MGI Symbol;Acc:MGI:1921461]
Mapk12	ENSMUSG00000022610.9	115.601	271.282	885.577	311.653	191.507	106.125	179.068	0.505521	0.0299638	0.312603	mitogen-activated protein kinase 12 [Source:MGI Symbol;Acc:MGI:1353438]
Nfe2l1	ENSMUSG00000038615.14	9143.75	8518.65	9811.27	8695.61	8496.77	7548.92	8034.88	0.161149	0.0299815	0.312603	nuclear factor, erythroid derived 2,-like 1 [Source:MGI Symbol;Acc:MGI:99421]
Sema3g	ENSMUSG00000021904.5	317.136	851.767	3505.23	989.374	399.274	198.234	428.651	0.445058	0.0299895	0.312603	sema domain, immunoglobulin domain (Ig), short basic domain, secreted, (semaphorin) 3G [Source:MGI Symbol;Acc:MGI:3041242]
Acbd3	ENSMUSG00000026499.5	7075.2	6221.01	7033.77	6033.2	5973.76	5623.64	5739.47	0.177769	0.0299897	0.312603	acyl-Coenzyme A binding domain containing 3 [Source:MGI Symbol;Acc:MGI:2181074]
Impact	ENSMUSG00000024423.5	1840.41	1683.12	1756.32	1632.47	1215.89	1347.59	1680.27	0.264011	0.029995	0.312603	impact, RWD domain protein [Source:MGI Symbol;Acc:MGI:1098233]
Erich1	ENSMUSG00000051978.8	483.888	451.164	441.729	495.676	559.164	551.652	552.05	-0.235286	0.030016	0.312603	glutamate rich 1 [Source:MGI Symbol;Acc:MGI:3588201]
Eef1a1	ENSMUSG00000037742.11	97622.7	97898.8	97394.4	97722.5	99353.3	106019	113641	-0.126185	0.0300695	0.312733	eukaryotic translation elongation factor 1 alpha 1 [Source:MGI Symbol;Acc:MGI:1096881]
Nkd2	ENSMUSG00000021567.11	79.7955	229.472	684.31	265.152	92.1402	45.0532	185.563	0.48659	0.0301245	0.312733	naked cuticle 2 homolog (Drosophila) [Source:MGI Symbol;Acc:MGI:1919543]
Commd5	ENSMUSG00000055041.7	475.704	691.332	528.592	508.538	758.802	710.84	661.532	-0.329146	0.0301493	0.312733	COMM domain containing 5 [Source:MGI Symbol;Acc:MGI:1913648]
Fsd1l	ENSMUSG00000054752.13	53.197	71.953	149.362	70.2456	151.76	150.177	161.44	-0.506187	0.0301543	0.312733	fibronectin type III and SPRY domain containing 1-like [Source:MGI Symbol;Acc:MGI:2442443]
Aldh6a1	ENSMUSG00000021238.10	1154.99	1195	1948.06	1666.11	1035.22	954.127	1259.05	0.379467	0.0301697	0.312733	aldehyde dehydrogenase family 6, subfamily A1 [Source:MGI Symbol;Acc:MGI:1915077]
Nipal1	ENSMUSG00000067219.6	128.9	192.523	207.623	138.512	253.837	234.277	228.243	-0.416845	0.0301978	0.312733	NIPA-like domain containing 1 [Source:MGI Symbol;Acc:MGI:1917951]
Hdc	ENSMUSG00000027360.5	293.607	184.744	951.254	264.163	1262.86	603.713	1661.72	-0.480093	0.0302082	0.312733	histidine decarboxylase [Source:MGI Symbol;Acc:MGI:96062]
Rps20	ENSMUSG00000028234.6	1348.34	1465.31	1583.66	1450.42	1570	1626.92	2004.08	-0.237503	0.0303411	0.313842	ribosomal protein S20 [Source:MGI Symbol;Acc:MGI:1914677]
Gm24187	ENSMUSG00000088609.1	428.645	501.726	480.924	422.463	564.584	538.636	546.483	-0.251472	0.0305037	0.315082	predicted gene, 24187 [Source:MGI Symbol;Acc:MGI:5453964]
Ect2	ENSMUSG00000027699.16	624.042	484.224	512.703	453.133	591.685	615.727	939.877	-0.388004	0.030527	0.315082	ect2 oncogene [Source:MGI Symbol;Acc:MGI:95281]
Ddit3	ENSMUSG00000025408.12	3424.05	2589.33	2645.08	2558.52	1550.12	2696.19	1942.85	0.37046	0.0305385	0.315082	DNA-damage inducible transcript 3 [Source:MGI Symbol;Acc:MGI:109247]
Lgr6	ENSMUSG00000042793.10	38.8747	56.3956	165.251	87.0649	233.964	75.0887	329.375	-0.497821	0.03059	0.315346	leucine-rich repeat-containing G protein-coupled receptor 6 [Source:MGI Symbol;Acc:MGI:2441805]
Zswim6	ENSMUSG00000032846.9	1477.24	1177.5	1618.62	1014.11	1574.51	1856.19	1704.4	-0.334247	0.0307077	0.316292	zinc finger SWIM-type containing 6 [Source:MGI Symbol;Acc:MGI:1914513]
Rplp0	ENSMUSG00000067274.7	9953.98	11376.3	10567.6	10556.6	11302.5	11476.6	12688.8	-0.157136	0.0307629	0.316382	ribosomal protein, large, P0 [Source:MGI Symbol;Acc:MGI:1927636]
Mrpl54	ENSMUSG00000034932.4	388.747	430.745	422.662	390.803	453.474	501.593	510.299	-0.247775	0.0307684	0.316382	mitochondrial ribosomal protein L54 [Source:MGI Symbol;Acc:MGI:1913297]
Eogt	ENSMUSG00000035245.9	1750.39	1594.63	3356.93	1777.91	1583.55	1335.58	1412.14	0.423654	0.030823	0.316677	EGF domain-specific O-linked N-acetylglucosamine (GlcNAc) transferase [Source:MGI Symbol;Acc:MGI:2141669]
Car12	ENSMUSG00000032373.11	29.6676	25.2808	6.35582	27.7025	65.9435	27.0319	90.9259	-0.481368	0.0308331	NA	carbonic anyhydrase 12 [Source:MGI Symbol;Acc:MGI:1923709]
6230400D17Rik	ENSMUSG00000097577.1	100.256	85.5657	100.634	88.0543	56.0068	57.0674	73.2974	0.440899	0.0308562	0.316751	RIKEN cDNA 6230400D17 gene [Source:MGI Symbol;Acc:MGI:1923383]
Rtn1	ENSMUSG00000021087.14	61.3812	140.017	393.001	176.109	84.9135	12.0142	79.7921	0.469791	0.0309037	0.316868	reticulon 1 [Source:MGI Symbol;Acc:MGI:1933947]
Nfkb2	ENSMUSG00000025225.11	5655.25	5046.43	5047.58	5287.22	5819.29	5576.59	6511.41	-0.181453	0.0309197	0.316868	nuclear factor of kappa light polypeptide gene enhancer in B cells 2, p49/p100 [Source:MGI Symbol;Acc:MGI:1099800]
Rnf166	ENSMUSG00000014470.4	14357.1	14912.7	11891.7	13966	15576.2	17521.7	15336.8	-0.22157	0.0309557	0.316921	ring finger protein 166 [Source:MGI Symbol;Acc:MGI:1915968]
2900026A02Rik	ENSMUSG00000051339.8	329.412	502.698	1368.62	456.102	334.234	262.31	404.528	0.511067	0.0309769	0.316921	RIKEN cDNA 2900026A02 gene [Source:MGI Symbol;Acc:MGI:1920194]
Endou	ENSMUSG00000022468.8	12.2762	57.3679	224.572	59.3625	25.2934	14.0166	24.1232	0.44034	0.0310434	NA	endonuclease, polyU-specific [Source:MGI Symbol;Acc:MGI:97746]
Stard10	ENSMUSG00000030688.11	1349.36	1549.91	1383.45	1283.22	1102.97	1298.53	1044.72	0.253139	0.0310523	0.317371	START domain containing 10 [Source:MGI Symbol;Acc:MGI:1860093]
Slc25a43	ENSMUSG00000037636.6	250.64	231.416	215.039	225.577	343.267	262.31	294.118	-0.337047	0.0310977	0.317371	solute carrier family 25, member 43 [Source:MGI Symbol;Acc:MGI:2684854]
Phf11b	ENSMUSG00000091649.3	4555.51	4582.63	3484.05	4300.81	5269.15	5745.79	4548.15	-0.275416	0.0311199	0.317371	PHD finger protein 11B [Source:MGI Symbol;Acc:MGI:3645789]
Cyyr1	ENSMUSG00000041134.12	105.371	328.65	845.324	405.643	184.28	109.129	227.315	0.503671	0.031125	0.317371	cysteine and tyrosine-rich protein 1 [Source:MGI Symbol;Acc:MGI:2152187]
Hfe	ENSMUSG00000006611.11	202.558	445.33	1346.37	545.145	342.364	130.154	324.735	0.504649	0.0312582	0.318463	hemochromatosis [Source:MGI Symbol;Acc:MGI:109191]
Tmtc1	ENSMUSG00000030306.11	1748.34	1686.03	2353.77	1676.99	1449.85	1622.92	1401.93	0.287651	0.0313997	0.319637	transmembrane and tetratricopeptide repeat containing 1 [Source:MGI Symbol;Acc:MGI:3039590]
Slc22a21	ENSMUSG00000063652.7	223.018	167.242	212.92	193.917	144.534	148.175	151.234	0.360818	0.031451	0.319825	solute carrier family 22 (organic cation transporter), member 21 [Source:MGI Symbol;Acc:MGI:1929481]
Tmem101	ENSMUSG00000020921.6	460.359	469.639	498.932	504.581	602.525	525.621	588.235	-0.235674	0.0314707	0.319825	transmembrane protein 101 [Source:MGI Symbol;Acc:MGI:1923797]
Gm36638	ENSMUSG00000104214.1	130.947	95.2891	114.405	116.746	67.7501	90.1065	71.4418	0.436521	0.0315867	0.320331	NA
Tyro3	ENSMUSG00000027298.14	747.827	774.953	720.326	571.858	827.455	851.005	927.816	-0.283181	0.0316179	0.320331	TYRO3 protein tyrosine kinase 3 [Source:MGI Symbol;Acc:MGI:104294]
Tmco3	ENSMUSG00000038497.6	2839.9	2766.3	2990.41	3319.35	2641.35	2659.14	2430.88	0.195062	0.0316194	0.320331	transmembrane and coiled-coil domains 3 [Source:MGI Symbol;Acc:MGI:2444946]
Insl3	ENSMUSG00000079019.2	68.5423	63.2019	55.0838	58.3731	94.8502	73.0863	128.966	-0.475084	0.0316311	0.320331	insulin-like 3 [Source:MGI Symbol;Acc:MGI:108427]
Zfp41	ENSMUSG00000047003.11	609.72	571.734	650.412	455.112	486.898	438.518	385.043	0.334144	0.0316519	0.320331	zinc finger protein 41 [Source:MGI Symbol;Acc:MGI:99186]
Bri3bp	ENSMUSG00000037905.10	243.479	262.531	323.087	372.994	415.534	334.395	528.855	-0.408209	0.0318345	0.321772	Bri3 binding protein [Source:MGI Symbol;Acc:MGI:1924059]
Gmfg	ENSMUSG00000060791.12	2787.73	2612.67	2184.28	2445.73	2821.12	3087.65	2959.73	-0.228811	0.0318471	0.321772	glia maturation factor, gamma [Source:MGI Symbol;Acc:MGI:1927135]
Rpl4	ENSMUSG00000032399.7	21277.8	20808	20754.9	19824.1	21107.3	22826	25617	-0.166192	0.0319758	0.322804	ribosomal protein L4 [Source:MGI Symbol;Acc:MGI:1915141]
Unc45bos	ENSMUSG00000086058.1	8.18416	20.4191	68.8547	25.7237	4.51668	11.013	5.56689	0.43151	0.0321123	NA	unc-45 homolog B (C. elegans), opposite strand [Source:MGI Symbol;Acc:MGI:3705119]
Klra17	ENSMUSG00000014543.11	30.6906	51.5339	21.1861	25.7237	41.5534	86.1017	76.0809	-0.507674	0.0321259	NA	killer cell lectin-like receptor, subfamily A, member 17 [Source:MGI Symbol;Acc:MGI:2180674]
Gm17552	ENSMUSG00000097233.1	362.149	386.99	266.944	396.739	235.77	231.273	298.757	0.384697	0.0322799	0.325455	predicted gene, 17552 [Source:MGI Symbol;Acc:MGI:4937186]
Gm37238	ENSMUSG00000103373.1	230.179	234.333	200.208	226.567	267.387	270.319	317.313	-0.319355	0.0322918	0.325455	NA
Cadps2	ENSMUSG00000017978.15	118.67	146.823	1105.91	359.143	163.504	156.185	131.75	0.480822	0.032431	0.326588	Ca2+-dependent activator protein for secretion 2 [Source:MGI Symbol;Acc:MGI:2443963]
Ephx1	ENSMUSG00000038776.10	1185.68	1916.48	3172.61	2127.15	2901.51	3220.81	3142.51	-0.432452	0.0324852	0.326864	epoxide hydrolase 1, microsomal [Source:MGI Symbol;Acc:MGI:95405]
Shmt1	ENSMUSG00000020534.11	200.512	181.827	275.419	259.216	303.521	268.317	414.734	-0.415546	0.0325614	0.327199	serine hydroxymethyltransferase 1 (soluble) [Source:MGI Symbol;Acc:MGI:98299]
Cnbp	ENSMUSG00000030057.12	73163.3	65513.2	62284.9	65886.4	56578.6	62573.9	56235.8	0.17927	0.0325722	0.327199	cellular nucleic acid binding protein [Source:MGI Symbol;Acc:MGI:88431]
Csrnp2	ENSMUSG00000044636.5	749.873	1024.84	963.966	847.894	805.775	684.809	575.246	0.328613	0.0327017	0.32823	cysteine-serine-rich nuclear protein 2 [Source:MGI Symbol;Acc:MGI:2386852]
Selp	ENSMUSG00000026580.13	93.0948	179.882	151.48	138.512	233.06	165.195	259.788	-0.45966	0.0328805	0.329752	selectin, platelet [Source:MGI Symbol;Acc:MGI:98280]
Hyi	ENSMUSG00000006395.13	397.955	498.809	429.018	503.591	563.681	576.681	546.483	-0.278206	0.033105	0.331665	hydroxypyruvate isomerase homolog (E. coli) [Source:MGI Symbol;Acc:MGI:1915430]
Emc10	ENSMUSG00000008140.14	5889.52	6557.44	5848.41	6244.93	6932.19	7402.75	6455.74	-0.175868	0.0331256	0.331665	ER membrane protein complex subunit 10 [Source:MGI Symbol;Acc:MGI:1916933]
Fibcd1	ENSMUSG00000026841.7	358.057	264.476	326.265	380.909	183.377	307.363	167.007	0.441057	0.0333653	0.333553	fibrinogen C domain containing 1 [Source:MGI Symbol;Acc:MGI:2138953]
Rpl18a	ENSMUSG00000045128.8	7008.71	7391.71	7274.23	6292.42	7297.14	7893.33	8834.66	-0.193513	0.0333843	0.333553	ribosomal protein L18A [Source:MGI Symbol;Acc:MGI:1924058]
Thap1	ENSMUSG00000037214.8	501.28	433.662	476.686	497.655	397.467	367.434	414.734	0.254866	0.0333964	0.333553	THAP domain containing, apoptosis associated protein 1 [Source:MGI Symbol;Acc:MGI:1921004]
Trip13	ENSMUSG00000021569.9	168.798	131.266	145.125	130.597	229.447	144.17	292.262	-0.453644	0.0334493	0.333582	thyroid hormone receptor interactor 13 [Source:MGI Symbol;Acc:MGI:1916966]
Itga1	ENSMUSG00000042284.9	848.083	1686.03	6279.55	1841.23	1056.9	587.694	871.219	0.464277	0.033454	0.333582	integrin alpha 1 [Source:MGI Symbol;Acc:MGI:96599]
Kif15	ENSMUSG00000036768.5	95.1408	101.123	179.022	152.364	242.997	145.172	263.5	-0.479451	0.0335131	0.333897	kinesin family member 15 [Source:MGI Symbol;Acc:MGI:1098258]
Parvg	ENSMUSG00000022439.6	7740.17	7418.93	6384.42	7775.49	8494.06	9140.8	7956.02	-0.213261	0.0337286	0.335716	parvin, gamma [Source:MGI Symbol;Acc:MGI:2158329]
Card6	ENSMUSG00000041849.7	2634.28	2329.72	2331.53	2461.56	2304.41	1965.32	2007.79	0.206073	0.0337506	0.335716	caspase recruitment domain family, member 6 [Source:MGI Symbol;Acc:MGI:3032959]
Clint1	ENSMUSG00000006169.16	15256.3	13004	13479.6	14676.4	15444.3	15797.7	16204.3	-0.16563	0.0337867	0.335757	clathrin interactor 1 [Source:MGI Symbol;Acc:MGI:2144243]
Lrrn3	ENSMUSG00000036295.4	75.7035	136.127	352.748	146.427	64.1368	6.0071	83.5034	0.451458	0.0338099	0.335757	leucine rich repeat protein 3, neuronal [Source:MGI Symbol;Acc:MGI:106036]
Layn	ENSMUSG00000060594.5	31.7136	81.6763	249.996	86.0756	40.6501	29.0343	50.102	0.478221	0.0338441	0.335805	layilin [Source:MGI Symbol;Acc:MGI:2685357]
RP23-393E10.2	ENSMUSG00000105161.1	89.0027	110.846	85.8035	144.449	62.3301	55.0651	79.7921	0.472611	0.0338698	0.335805	NA
Prdm8	ENSMUSG00000035456.7	20.4604	40.8382	131.354	64.3093	18.97	12.0142	31.5457	0.466549	0.0338951	NA	PR domain containing 8 [Source:MGI Symbol;Acc:MGI:1924880]
Gins4	ENSMUSG00000031546.5	2352.95	2461.96	2190.64	2314.15	2637.74	2608.08	2558.92	-0.16003	0.0339352	0.33605	GINS complex subunit 4 (Sld5 homolog) [Source:MGI Symbol;Acc:MGI:1923847]
Mmrn1	ENSMUSG00000054641.8	137.085	147.795	576.261	61.3412	48.7801	6.0071	102.06	0.423136	0.0339755	0.33605	multimerin 1 [Source:MGI Symbol;Acc:MGI:1918195]
Ppp2r5b	ENSMUSG00000024777.9	3754.48	3954.5	4541.23	3495.46	3509.46	3311.91	3305.81	0.205133	0.0339773	0.33605	protein phosphatase 2, regulatory subunit B', beta [Source:MGI Symbol;Acc:MGI:2388480]
Mars	ENSMUSG00000040354.11	6114.59	6487.43	5407.74	6747.53	5448.92	5319.28	5227.31	0.201446	0.0341749	0.33773	methionine-tRNA synthetase [Source:MGI Symbol;Acc:MGI:1345633]
Raph1	ENSMUSG00000026014.12	1332.99	1618.94	1809.29	1305.97	1227.63	1275.51	1184.82	0.272012	0.0342232	0.337778	Ras association (RalGDS/AF-6) and pleckstrin homology domains 1 [Source:MGI Symbol;Acc:MGI:1924550]
Igsf8	ENSMUSG00000038034.12	2805.12	2851.87	2870.71	2873.14	3295.37	2898.42	3298.38	-0.152874	0.0342351	0.337778	immunoglobulin superfamily, member 8 [Source:MGI Symbol;Acc:MGI:2154090]
Atxn1l	ENSMUSG00000069895.3	667.009	591.181	658.887	708.392	532.064	445.526	600.297	0.2858	0.0344429	0.339552	ataxin 1-like [Source:MGI Symbol;Acc:MGI:3694797]
Nup37	ENSMUSG00000035351.12	727.367	841.072	644.056	741.041	903.335	884.044	881.425	-0.254364	0.0346103	0.340759	nucleoporin 37 [Source:MGI Symbol;Acc:MGI:1919964]
Tmem47	ENSMUSG00000025666.13	46.0359	305.314	941.72	388.824	162.6	70.0828	166.079	0.460602	0.0346327	0.340759	transmembrane protein 47 [Source:MGI Symbol;Acc:MGI:2177570]
2810403A07Rik	ENSMUSG00000028060.11	7436.33	6933.74	6793.31	7811.11	6447.1	6568.76	6272.96	0.162122	0.0346877	0.340759	RIKEN cDNA 2810403A07 gene [Source:MGI Symbol;Acc:MGI:1921450]
Zfp62	ENSMUSG00000046311.10	5197.96	5220.48	4988.26	5027.01	4685.6	4511.33	4807.94	0.122688	0.0347029	0.340759	zinc finger protein 62 [Source:MGI Symbol;Acc:MGI:99662]
Kpna1	ENSMUSG00000022905.9	10692.6	8434.05	10289	9871.98	8493.16	8210.7	8817.03	0.193656	0.034731	0.340759	karyopherin (importin) alpha 1 [Source:MGI Symbol;Acc:MGI:103560]
Pttg1ip	ENSMUSG00000009291.9	13179.6	14571.4	16465.8	14433	13092.9	13308.7	12203.6	0.175297	0.0347331	0.340759	pituitary tumor-transforming 1 interacting protein [Source:MGI Symbol;Acc:MGI:2652132]
Sepp1	ENSMUSG00000064373.8	17189.8	21252.4	38420.9	21632.7	17563.5	16226.2	18512.7	0.393924	0.0347945	0.341087	selenoprotein P, plasma, 1 [Source:MGI Symbol;Acc:MGI:894288]
Ints6	ENSMUSG00000035161.6	5939.65	5159.22	6421.5	6260.76	4981.89	5320.29	5244.01	0.184975	0.0349005	0.341851	integrator complex subunit 6 [Source:MGI Symbol;Acc:MGI:1202397]
Shfm1	ENSMUSG00000042541.9	1597.96	1799.8	1766.92	1628.51	2046.96	1881.22	1843.57	-0.180169	0.0349857	0.34241	split hand/foot malformation (ectrodactyly) type 1 [Source:MGI Symbol;Acc:MGI:109238]
Cdkn2b	ENSMUSG00000073802.4	51.151	153.629	403.594	139.502	71.3635	49.058	95.565	0.48347	0.0350761	0.343	cyclin-dependent kinase inhibitor 2B (p15, inhibits CDK4) [Source:MGI Symbol;Acc:MGI:104737]
Ptpn5	ENSMUSG00000030854.12	159.591	68.0636	104.871	86.0756	281.841	115.136	184.635	-0.497249	0.0351472	0.343	protein tyrosine phosphatase, non-receptor type 5 [Source:MGI Symbol;Acc:MGI:97807]
Ppil1	ENSMUSG00000024007.11	653.71	849.823	936.424	835.032	1164.4	1010.19	912.043	-0.303166	0.0351509	0.343	peptidylprolyl isomerase (cyclophilin)-like 1 [Source:MGI Symbol;Acc:MGI:1916066]
Nod1	ENSMUSG00000038058.11	28664	27062.1	24273.9	27264.2	24073.9	24497.9	20667.1	0.202045	0.0351585	0.343	nucleotide-binding oligomerization domain containing 1 [Source:MGI Symbol;Acc:MGI:1341839]
Nme4	ENSMUSG00000024177.8	8.18416	8.75104	29.6605	17.8087	24.39	36.0426	72.3696	-0.464303	0.0352006	NA	NME/NM23 nucleoside diphosphate kinase 4 [Source:MGI Symbol;Acc:MGI:1931148]
Cript	ENSMUSG00000024146.6	4457.3	4529.15	4531.7	4531.33	4850.91	5118.05	4718.87	-0.121695	0.0352669	0.343569	cysteine-rich PDZ-binding protein [Source:MGI Symbol;Acc:MGI:1929655]
Il17rd	ENSMUSG00000040717.5	45.0129	76.8146	282.834	153.353	47.8768	10.0118	68.6583	0.452553	0.0352733	0.343569	interleukin 17 receptor D [Source:MGI Symbol;Acc:MGI:2159727]
Krt18	ENSMUSG00000023043.6	51.151	147.795	654.649	195.896	1018.06	629.744	1069.77	-0.424317	0.0353036	0.34359	keratin 18 [Source:MGI Symbol;Acc:MGI:96692]
Tspan15	ENSMUSG00000037031.9	326.343	570.762	1752.09	626.274	461.604	269.318	446.279	0.499205	0.0353644	0.343705	tetraspanin 15 [Source:MGI Symbol;Acc:MGI:1917673]
Elovl7	ENSMUSG00000021696.8	6663.95	5982.79	5557.1	5358.45	5152.62	5265.22	4572.27	0.220178	0.0353719	0.343705	ELOVL family member 7, elongation of long chain fatty acids (yeast) [Source:MGI Symbol;Acc:MGI:1921809]
Blvra	ENSMUSG00000001999.12	1498.72	1594.63	1545.52	1304	1616.07	1752.07	1793.47	-0.207457	0.035439	0.344083	biliverdin reductase A [Source:MGI Symbol;Acc:MGI:88170]
Srgn	ENSMUSG00000020077.11	17247.1	16009.5	18154.3	16589.8	18037.8	18346.7	18889.4	-0.120444	0.0355057	0.344457	serglycin [Source:MGI Symbol;Acc:MGI:97756]
Dhrs1	ENSMUSG00000002332.12	1456.78	1509.07	1654.63	1719.53	1902.42	1800.13	1731.3	-0.191579	0.0355377	0.344492	dehydrogenase/reductase (SDR family) member 1 [Source:MGI Symbol;Acc:MGI:1196314]
A430093F15Rik	ENSMUSG00000067577.5	10.2302	17.5021	19.0675	35.6175	40.6501	37.0438	64.0193	-0.489747	0.0355822	NA	RIKEN cDNA A430093F15 gene [Source:MGI Symbol;Acc:MGI:2685520]
Ccm2l	ENSMUSG00000027474.9	235.295	607.711	2360.13	739.063	355.011	199.235	286.695	0.443772	0.035696	0.345436	cerebral cavernous malformation 2-like [Source:MGI Symbol;Acc:MGI:2385159]
Ap1b1	ENSMUSG00000009090.14	14180.1	13070.2	11654.5	12705.5	14841.8	14298.9	14721.6	-0.178891	0.0357199	0.345436	adaptor protein complex AP-1, beta 1 subunit [Source:MGI Symbol;Acc:MGI:1096368]
Steap3	ENSMUSG00000026389.13	1856.78	2005.93	1527.52	1733.38	2103.87	2188.59	2058.82	-0.238401	0.0357201	0.345436	STEAP family member 3 [Source:MGI Symbol;Acc:MGI:1915678]
Tpbg	ENSMUSG00000035274.10	14.3223	27.2254	93.2187	8.90437	123.757	61.0722	148.45	-0.441096	0.0358217	NA	trophoblast glycoprotein [Source:MGI Symbol;Acc:MGI:1341264]
Gm17971	ENSMUSG00000101122.1	583.121	342.263	347.451	406.633	220.414	305.361	327.519	0.424851	0.035872	0.34663	NA
Crmp1	ENSMUSG00000029121.12	171.867	91.3997	93.2187	116.746	158.084	196.232	204.119	-0.457883	0.0359894	0.347488	collapsin response mediator protein 1 [Source:MGI Symbol;Acc:MGI:107793]
Gm22107	ENSMUSG00000084497.1	567.776	368.516	437.492	317.589	258.354	321.38	308.963	0.402932	0.0360811	0.348098	predicted gene, 22107 [Source:MGI Symbol;Acc:MGI:5451884]
Ptar1	ENSMUSG00000074925.3	664.963	684.525	609.099	588.678	575.424	469.555	516.793	0.263308	0.0361497	0.348484	protein prenyltransferase alpha subunit repeat containing 1 [Source:MGI Symbol;Acc:MGI:1921875]
Kctd21	ENSMUSG00000044952.5	194.374	279.061	370.756	265.152	222.22	180.213	148.45	0.433767	0.036246	0.349137	potassium channel tetramerisation domain containing 21 [Source:MGI Symbol;Acc:MGI:3643121]
Amica1	ENSMUSG00000048534.6	84.9106	72.9253	157.836	171.162	283.647	110.13	318.241	-0.496781	0.0363042	0.349378	adhesion molecule, interacts with CXADR antigen 1 [Source:MGI Symbol;Acc:MGI:2685484]
Nxt2	ENSMUSG00000042271.10	884.912	915.942	1123.92	1160.54	841.908	817.966	851.735	0.259171	0.0363597	0.349378	nuclear transport factor 2-like export factor 2 [Source:MGI Symbol;Acc:MGI:2147914]
Denr	ENSMUSG00000023106.12	2713.05	2918.96	2639.78	2826.64	2989.14	3181.76	3064.57	-0.151417	0.0363614	0.349378	density-regulated protein [Source:MGI Symbol;Acc:MGI:1915434]
Rgs19	ENSMUSG00000002458.10	5104.87	5151.44	4556.06	5095.28	5584.42	5597.61	5463.91	-0.157724	0.0363858	0.349378	regulator of G-protein signaling 19 [Source:MGI Symbol;Acc:MGI:1915153]
Gm15675	ENSMUSG00000086825.1	35.8057	69.0359	80.507	92.0118	125.564	94.1112	147.523	-0.488704	0.0364408	0.349549	predicted gene 15675 [Source:MGI Symbol;Acc:MGI:3783117]
Rpa3	ENSMUSG00000012483.4	649.617	881.91	680.073	788.531	1043.35	848.002	926.888	-0.297309	0.0364703	0.349549	replication protein A3 [Source:MGI Symbol;Acc:MGI:1915490]
4930412M03Rik	ENSMUSG00000051008.5	126.854	104.04	58.2617	112.789	51.4901	65.0769	58.4524	0.48187	0.0365245	0.349549	RIKEN cDNA 4930412M03 gene [Source:MGI Symbol;Acc:MGI:2443570]
Itm2a	ENSMUSG00000031239.5	3941.69	4099.37	3477.69	4005.98	4397.44	4437.24	4336.61	-0.176721	0.0365388	0.349549	integral membrane protein 2A [Source:MGI Symbol;Acc:MGI:107706]
Mcf2l	ENSMUSG00000031442.17	573.914	1061.79	3276.42	1243.64	722.668	531.628	564.112	0.481336	0.036547	0.349549	mcf.2 transforming sequence-like [Source:MGI Symbol;Acc:MGI:103263]
Ttc7b	ENSMUSG00000033530.7	5948.86	5547.18	5597.36	6046.07	5179.72	5425.41	4624.23	0.176571	0.0365812	0.349601	tetratricopeptide repeat domain 7B [Source:MGI Symbol;Acc:MGI:2144724]
Leng8	ENSMUSG00000035545.10	22226.1	17458.3	16566.4	20205	16683.7	14968.7	16235.8	0.239658	0.0366576	0.349907	leukocyte receptor cluster (LRC) member 8 [Source:MGI Symbol;Acc:MGI:2142195]
Tek	ENSMUSG00000006386.12	1680.82	3137.73	15663.9	3896.16	2046.96	1041.23	1743.37	0.431593	0.0366838	0.349907	endothelial-specific receptor tyrosine kinase [Source:MGI Symbol;Acc:MGI:98664]
RP24-324L19.3	ENSMUSG00000104913.1	208.696	205.163	175.844	218.652	291.777	265.313	234.737	-0.338024	0.0366994	0.349907	NA
4833445I07Rik	ENSMUSG00000103103.1	26.5985	23.3361	37.0756	32.6493	52.3934	41.0485	67.7305	-0.490264	0.0368198	NA	NA
Plekhf1	ENSMUSG00000074170.4	1672.64	1903.84	1257.39	1603.78	1358.62	1325.57	951.011	0.346661	0.0368412	0.350986	pleckstrin homology domain containing, family F (with FYVE domain) member 1 [Source:MGI Symbol;Acc:MGI:1919537]
Gprasp1	ENSMUSG00000043384.12	2626.09	2097.33	2687.45	1926.31	1707.3	1901.25	2031.92	0.279266	0.0369693	0.35193	G protein-coupled receptor associated sorting protein 1 [Source:MGI Symbol;Acc:MGI:1917418]
Fam64a	ENSMUSG00000020808.3	2.04604	36.9488	47.6686	54.4156	124.66	73.0863	131.75	-0.43668	0.0370747	NA	family with sequence similarity 64, member A [Source:MGI Symbol;Acc:MGI:1924434]
Sema6a	ENSMUSG00000019647.13	1289	1970.93	4871.73	2217.19	1581.74	1317.56	1645.02	0.476935	0.037123	0.352889	sema domain, transmembrane domain (TM), and cytoplasmic domain, (semaphorin) 6A [Source:MGI Symbol;Acc:MGI:1203727]
Zfp110	ENSMUSG00000058638.10	6847.07	5837.91	5356.9	6571.42	5197.79	5085.01	5431.43	0.21649	0.0371376	0.352889	zinc finger protein 110 [Source:MGI Symbol;Acc:MGI:1890378]
Tspan12	ENSMUSG00000029669.11	371.356	996.646	3964.97	1430.64	542.001	282.334	520.505	0.430065	0.037221	0.352889	tetraspanin 12 [Source:MGI Symbol;Acc:MGI:1889818]
Ndufs2	ENSMUSG00000013593.9	4764.2	5279.79	5221.3	5134.85	5854.52	5399.38	5524.21	-0.136546	0.0372305	0.352889	NADH dehydrogenase (ubiquinone) Fe-S protein 2 [Source:MGI Symbol;Acc:MGI:2385112]
Gzmc	ENSMUSG00000079186.2	52.174	51.5339	41.3128	50.4581	83.1068	55.0651	111.338	-0.479832	0.0372314	NA	granzyme C [Source:MGI Symbol;Acc:MGI:109256]
Trim41	ENSMUSG00000040365.11	232.225	241.14	236.225	260.205	323.394	348.412	262.572	-0.322738	0.037233	0.352889	tripartite motif-containing 41 [Source:MGI Symbol;Acc:MGI:2384814]
Cebpe	ENSMUSG00000052435.6	6.13812	3.88935	0	0	27.1001	4.00473	55.6689	-0.300908	0.0372426	NA	CCAAT/enhancer binding protein (C/EBP), epsilon [Source:MGI Symbol;Acc:MGI:103572]
Nedd4l	ENSMUSG00000024589.12	1196.93	1179.45	1578.36	1161.53	970.182	1099.3	1054	0.266412	0.0372438	0.352889	neural precursor cell expressed, developmentally down-regulated gene 4-like [Source:MGI Symbol;Acc:MGI:1933754]
Glrx5	ENSMUSG00000021102.3	1658.31	1995.24	1816.7	1570.14	2111.09	2120.51	1946.56	-0.220517	0.0373462	0.353585	glutaredoxin 5 homolog (S. cerevisiae) [Source:MGI Symbol;Acc:MGI:1920296]
Gm12596	ENSMUSG00000086952.1	494.118	426.856	389.824	368.047	544.711	661.782	457.413	-0.348202	0.037508	0.354841	predicted gene 12596 [Source:MGI Symbol;Acc:MGI:3649247]
Mcc	ENSMUSG00000071856.7	191.305	492.975	2074.12	618.359	257.451	117.138	276.489	0.425318	0.0375788	0.354898	mutated in colorectal cancers [Source:MGI Symbol;Acc:MGI:96930]
Sfmbt2	ENSMUSG00000061186.12	0	4.86169	10.593	3.9575	5.42001	24.0284	61.2358	-0.342389	0.0376162	NA	Scm-like with four mbt domains 2 [Source:MGI Symbol;Acc:MGI:2447794]
Gm15800	ENSMUSG00000042744.13	2689.52	2435.7	2299.75	2234.01	1922.3	1916.26	2289.85	0.223962	0.0376386	0.354898	predicted gene 15800 [Source:MGI Symbol;Acc:MGI:3647820]
Kitl	ENSMUSG00000019966.14	466.497	1265.98	4975.55	2007.44	719.055	314.371	731.119	0.43051	0.0377273	0.354898	kit ligand [Source:MGI Symbol;Acc:MGI:96974]
Rfc5	ENSMUSG00000029363.11	2124.81	2452.23	2052.93	2293.37	2635.03	2563.03	2465.21	-0.192681	0.0377296	0.354898	replication factor C (activator 1) 5 [Source:MGI Symbol;Acc:MGI:1919401]
Foxp3	ENSMUSG00000039521.9	46.0359	37.9212	204.445	151.374	169.827	105.124	663.388	-0.449745	0.0377381	0.354898	forkhead box P3 [Source:MGI Symbol;Acc:MGI:1891436]
Olfm4	ENSMUSG00000022026.6	0	5.83402	8.47442	0	18.97	5.00591	127.111	-0.289461	0.0377425	NA	olfactomedin 4 [Source:MGI Symbol;Acc:MGI:2685142]
Sptbn5	ENSMUSG00000074899.4	27.6215	54.4509	72.0326	49.4687	21.68	13.0154	33.4014	0.489051	0.0377461	NA	spectrin beta, non-erythrocytic 5 [Source:MGI Symbol;Acc:MGI:2685200]
Zdhhc21	ENSMUSG00000028403.12	1159.08	1164.86	1151.46	1029.94	1537.48	1258.49	1223.79	-0.240716	0.0377996	0.354898	zinc finger, DHHC domain containing 21 [Source:MGI Symbol;Acc:MGI:1915518]
1190007I07Rik	ENSMUSG00000063320.8	145.269	155.574	130.294	158.3	166.214	206.244	228.243	-0.370097	0.0378278	0.354898	RIKEN cDNA 1190007I07 gene [Source:MGI Symbol;Acc:MGI:3698433]
Sh2d1a	ENSMUSG00000005696.8	3123.28	3167.87	2523.26	2921.62	3551.01	3627.29	3196.32	-0.228164	0.0378306	0.354898	SH2 domain containing 1A [Source:MGI Symbol;Acc:MGI:1328352]
Cfap36	ENSMUSG00000020462.11	1490.54	1521.71	1543.4	1490	1639.55	1712.02	1629.24	-0.138481	0.0378409	0.354898	cilia and flagella associated protein 36 [Source:MGI Symbol;Acc:MGI:1913994]
Kansl1	ENSMUSG00000018412.13	14715.1	11579.6	12263.6	12632.3	10862.6	10893.9	11423.3	0.197024	0.037854	0.354898	KAT8 regulatory NSL complex subunit 1 [Source:MGI Symbol;Acc:MGI:1923969]
Prps1l3	ENSMUSG00000079104.4	3656.27	3330.26	3485.11	3333.2	3179.74	3142.71	2839.12	0.165427	0.0378704	0.354898	phosphoribosyl pyrophosphate synthetase 1-like 3 [Source:MGI Symbol;Acc:MGI:3779453]
Ms4a6d	ENSMUSG00000024679.7	87.9797	188.633	397.239	346.281	818.422	263.311	510.299	-0.490685	0.0378868	0.354898	membrane-spanning 4-domains, subfamily A, member 6D [Source:MGI Symbol;Acc:MGI:1916024]
Lmnb1	ENSMUSG00000024590.8	2242.46	2071.08	2602.71	1637.41	2689.23	2437.88	2891.07	-0.29582	0.0378927	0.354898	lamin B1 [Source:MGI Symbol;Acc:MGI:96795]
Ldoc1l	ENSMUSG00000055745.4	243.479	274.199	389.824	271.089	368.561	428.506	384.116	-0.359554	0.038038	0.355554	leucine zipper, down-regulated in cancer 1-like [Source:MGI Symbol;Acc:MGI:2675858]
Gm14125	ENSMUSG00000084320.2	96.1638	92.372	74.1512	108.831	138.21	161.19	113.193	-0.427235	0.0380492	0.355554	predicted gene 14125 [Source:MGI Symbol;Acc:MGI:3650328]
Apool	ENSMUSG00000025525.9	808.185	947.057	942.78	987.395	1034.32	1156.37	1044.72	-0.220745	0.0380704	0.355554	apolipoprotein O-like [Source:MGI Symbol;Acc:MGI:1915367]
Irgm2	ENSMUSG00000069874.6	726.344	897.467	1700.18	1147.67	935.855	580.686	652.254	0.442431	0.0380814	0.355554	immunity-related GTPase family M member 2 [Source:MGI Symbol;Acc:MGI:1926262]
Suco	ENSMUSG00000040297.9	9454.75	6573.97	7024.24	6954.31	5601.58	6324.47	6332.34	0.272456	0.0381232	0.355554	SUN domain containing ossification factor [Source:MGI Symbol;Acc:MGI:2138346]
Gpc1	ENSMUSG00000034220.7	44464.5	42592.3	32233.5	37055	33908.5	33700.8	28207.4	0.2643	0.0381378	0.355554	glypican 1 [Source:MGI Symbol;Acc:MGI:1194891]
AW011738	ENSMUSG00000078349.2	516.625	385.046	493.635	319.568	292.681	363.429	245.871	0.399311	0.0382149	0.355714	expressed sequence AW011738 [Source:MGI Symbol;Acc:MGI:2140540]
Mpo	ENSMUSG00000009350.10	0	23.3361	171.607	23.745	3864.47	373.441	3061.79	-0.260931	0.0382178	0.355714	myeloperoxidase [Source:MGI Symbol;Acc:MGI:97137]
Chst15	ENSMUSG00000030930.10	211.765	401.575	1175.83	511.506	268.291	160.189	373.91	0.490239	0.0382426	0.355714	carbohydrate (N-acetylgalactosamine 4-sulfate 6-O) sulfotransferase 15 [Source:MGI Symbol;Acc:MGI:1924840]
Afap1l1	ENSMUSG00000033032.12	1080.31	2672.96	10585.6	3369.81	1607.94	973.15	1349.04	0.440019	0.038341	0.356358	actin filament associated protein 1-like 1 [Source:MGI Symbol;Acc:MGI:2147199]
Dach1	ENSMUSG00000055639.13	117.647	192.523	716.089	249.322	126.467	64.0757	192.986	0.477553	0.0383732	0.356385	dachshund 1 (Drosophila) [Source:MGI Symbol;Acc:MGI:1277991]
Ptcd3	ENSMUSG00000063884.4	4018.42	3879.63	3631.29	4090.07	3544.69	3485.12	3436.63	0.153384	0.0385051	0.357068	pentatricopeptide repeat domain 3 [Source:MGI Symbol;Acc:MGI:1917206]
Ppm1h	ENSMUSG00000034613.9	2317.14	2355.97	2151.44	2495.2	2706.39	2669.15	2520.87	-0.175293	0.0385358	0.357068	protein phosphatase 1H (PP2C domain containing) [Source:MGI Symbol;Acc:MGI:2442087]
Hnrnpa0	ENSMUSG00000007836.6	1058.83	1090.96	1148.28	824.149	1355.91	1388.64	1106.88	-0.292365	0.0385413	0.357068	heterogeneous nuclear ribonucleoprotein A0 [Source:MGI Symbol;Acc:MGI:1924384]
Wls	ENSMUSG00000028173.7	6266	5768.88	7563.42	7922.91	7936.7	8254.75	8213.95	-0.233671	0.0385639	0.357068	wntless homolog (Drosophila) [Source:MGI Symbol;Acc:MGI:1915401]
Patl1	ENSMUSG00000046139.7	4942.21	4301.62	4106.92	4741.08	4017.13	3908.62	3879.2	0.188436	0.0386444	0.357201	protein associated with topoisomerase II homolog 1 (yeast) [Source:MGI Symbol;Acc:MGI:2147679]
Gng11	ENSMUSG00000032766.8	225.064	471.584	1363.32	470.942	348.687	238.282	313.602	0.48994	0.0386865	0.357201	guanine nucleotide binding protein (G protein), gamma 11 [Source:MGI Symbol;Acc:MGI:1913316]
Acp1	ENSMUSG00000044573.11	732.482	823.57	761.639	810.297	937.662	932.101	847.096	-0.207262	0.0386923	0.357201	acid phosphatase 1, soluble [Source:MGI Symbol;Acc:MGI:87881]
Stxbp1	ENSMUSG00000026797.12	671.101	880.938	2437.46	1109.09	888.882	585.692	679.161	0.481349	0.0386956	0.357201	syntaxin binding protein 1 [Source:MGI Symbol;Acc:MGI:107363]
Cul3	ENSMUSG00000004364.11	10798	5747.49	12887.5	6726.76	12924.9	13699.2	11851.9	-0.403324	0.0388841	0.35867	cullin 3 [Source:MGI Symbol;Acc:MGI:1347360]
Cyp4b1	ENSMUSG00000028713.14	1187.73	4255.92	14617.3	4736.13	1817.51	1053.24	2070.88	0.424428	0.0390535	0.359692	cytochrome P450, family 4, subfamily b, polypeptide 1 [Source:MGI Symbol;Acc:MGI:103225]
Ccdc32	ENSMUSG00000039983.10	1729.93	1759.93	1758.44	1749.21	1895.2	1994.36	1867.69	-0.136491	0.039054	0.359692	coiled-coil domain containing 32 [Source:MGI Symbol;Acc:MGI:2685477]
Lifr	ENSMUSG00000054263.8	388.747	1098.74	3001.01	1530.56	523.934	257.304	696.789	0.450057	0.0391209	0.360037	leukemia inhibitory factor receptor [Source:MGI Symbol;Acc:MGI:96788]
Tlr1	ENSMUSG00000044827.7	89.0027	73.8976	183.259	188.97	224.027	102.121	591.018	-0.478719	0.0392101	0.360331	toll-like receptor 1 [Source:MGI Symbol;Acc:MGI:1341295]
Gnao1	ENSMUSG00000031748.12	38.8747	35.0041	204.445	90.0331	40.6501	31.0367	26.9067	0.461441	0.0392429	NA	guanine nucleotide binding protein, alpha O [Source:MGI Symbol;Acc:MGI:95775]
Pip5k1c	ENSMUSG00000034902.14	13505.9	13364.8	13695.7	12295.9	12432.6	11925.1	11644.1	0.13058	0.0392528	0.360331	phosphatidylinositol-4-phosphate 5-kinase, type 1 gamma [Source:MGI Symbol;Acc:MGI:1298224]
C5ar1	ENSMUSG00000049130.5	79.7955	101.123	315.672	247.344	306.231	116.137	1042.86	-0.45828	0.0392547	0.360331	complement component 5a receptor 1 [Source:MGI Symbol;Acc:MGI:88232]
Car14	ENSMUSG00000038526.11	41.9438	159.463	450.204	108.831	102.98	44.052	37.1126	0.448587	0.0392712	0.360331	carbonic anhydrase 14 [Source:MGI Symbol;Acc:MGI:1344341]
Zfp438	ENSMUSG00000050945.7	336.573	307.259	471.39	364.09	278.227	293.347	264.427	0.34236	0.0393145	0.360457	zinc finger protein 438 [Source:MGI Symbol;Acc:MGI:2444919]
Grtp1	ENSMUSG00000038515.9	58.3121	245.029	666.302	255.259	144.534	97.1147	114.121	0.470739	0.0394053	0.361017	GH regulated TBC protein 1 [Source:MGI Symbol;Acc:MGI:1914040]
Gm28707	ENSMUSG00000100071.1	49.1049	32.0871	43.4314	43.5325	64.1368	81.0958	60.308	-0.465241	0.0394639	NA	NA
Rps5	ENSMUSG00000012848.11	2683.38	3108.56	3017.95	2584.25	3249.3	3121.69	3322.51	-0.181257	0.0394745	0.36138	ribosomal protein S5 [Source:MGI Symbol;Acc:MGI:1097682]
Cfap126	ENSMUSG00000026649.11	69.5653	62.2296	78.3884	67.2774	48.7801	39.0461	46.3908	0.442647	0.039475	NA	RIKEN cDNA 1700009P17 gene [Source:MGI Symbol;Acc:MGI:1922722]
2008-03-01	ENSMUSG00000025702.12	2762.15	3062.86	3491.46	2667.35	2602.51	2420.86	2625.72	0.214118	0.0396183	0.3624	membrane-associated ring finger (C3HC4) 8 [Source:MGI Symbol;Acc:MGI:1919029]
Nbeal1	ENSMUSG00000073664.8	2029.67	1364.19	2206.53	1921.36	1412.82	1372.62	1615.33	0.311137	0.0396546	0.3624	neurobeachin like 1 [Source:MGI Symbol;Acc:MGI:2444343]
Notch4	ENSMUSG00000015468.11	671.101	1802.71	5803.92	1744.27	1058.71	602.712	734.83	0.445343	0.0396785	0.3624	notch 4 [Source:MGI Symbol;Acc:MGI:107471]
Nos1ap	ENSMUSG00000038473.11	795.909	812.874	602.743	888.458	588.071	565.668	661.532	0.31253	0.0397587	0.3624	nitric oxide synthase 1 (neuronal) adaptor protein [Source:MGI Symbol;Acc:MGI:1917979]
Nit1	ENSMUSG00000013997.7	1573.4	1523.65	1575.18	1409.86	1728.08	1814.14	1618.11	-0.17774	0.0397639	0.3624	nitrilase 1 [Source:MGI Symbol;Acc:MGI:1350916]
Ccdc28a	ENSMUSG00000059554.9	1042.46	1025.82	902.526	1099.19	1207.76	1132.34	1221.01	-0.215374	0.0397644	0.3624	coiled-coil domain containing 28A [Source:MGI Symbol;Acc:MGI:2443508]
Sstr4	ENSMUSG00000037014.4	5.1151	13.6127	76.2698	14.8406	3.61334	2.00237	6.49471	0.368094	0.0398065	NA	somatostatin receptor 4 [Source:MGI Symbol;Acc:MGI:105372]
Cisd3	ENSMUSG00000078695.5	1101.79	1223.2	915.238	978.491	1417.33	1326.57	1157.91	-0.279586	0.0398921	0.3626	CDGSH iron sulfur domain 3 [Source:MGI Symbol;Acc:MGI:101788]
Scoc	ENSMUSG00000063253.7	633.249	631.047	1013.75	778.637	493.221	619.732	593.802	0.352496	0.0399016	0.3626	short coiled-coil protein [Source:MGI Symbol;Acc:MGI:1927654]
Flt3	ENSMUSG00000042817.14	32.7366	46.6722	92.1594	58.3731	83.1068	61.0722	251.438	-0.476063	0.0399184	0.3626	FMS-like tyrosine kinase 3 [Source:MGI Symbol;Acc:MGI:95559]
Notch1	ENSMUSG00000026923.12	6402.06	6501.05	7829.31	6014.41	6350.45	5181.12	5314.53	0.229854	0.0399188	0.3626	notch 1 [Source:MGI Symbol;Acc:MGI:97363]
Myo10	ENSMUSG00000022272.14	214.834	609.655	1770.1	720.264	420.051	252.298	442.568	0.483437	0.0399662	0.3626	myosin X [Source:MGI Symbol;Acc:MGI:107716]
Birc2	ENSMUSG00000057367.9	7541.7	6240.46	6295.44	7261.02	5768.7	5850.91	6138.43	0.19426	0.0399804	0.3626	baculoviral IAP repeat-containing 2 [Source:MGI Symbol;Acc:MGI:1197009]
Pfkfb1	ENSMUSG00000025271.10	115.601	115.708	129.235	145.438	145.437	174.206	205.975	-0.383992	0.0400062	0.3626	6-phosphofructo-2-kinase/fructose-2,6-biphosphatase 1 [Source:MGI Symbol;Acc:MGI:107816]
Kdr	ENSMUSG00000062960.7	1525.32	3403.18	14048.5	4488.79	2045.15	968.144	2060.68	0.4314	0.0400243	0.3626	kinase insert domain protein receptor [Source:MGI Symbol;Acc:MGI:96683]
Magix	ENSMUSG00000031147.8	10.2302	38.8935	90.0408	75.1924	20.7767	10.0118	18.5563	0.439211	0.0400768	NA	MAGI family member, X-linked [Source:MGI Symbol;Acc:MGI:1859644]
Ttc12	ENSMUSG00000040219.4	129.923	110.846	261.648	138.512	72.2668	108.128	97.4206	0.474331	0.0402235	0.363875	tetratricopeptide repeat domain 12 [Source:MGI Symbol;Acc:MGI:2444588]
Mmd	ENSMUSG00000003948.13	5146.81	4544.7	4824.07	3899.12	5150.82	5918.99	5182.78	-0.226912	0.0402248	0.363875	monocyte to macrophage differentiation-associated [Source:MGI Symbol;Acc:MGI:1914718]
Maml3	ENSMUSG00000061143.12	412.277	319.899	519.059	435.325	369.464	250.296	287.623	0.380983	0.0403012	0.364296	mastermind like 3 (Drosophila) [Source:MGI Symbol;Acc:MGI:2389461]
Smyd2	ENSMUSG00000026603.10	82.8646	98.2061	177.963	86.0756	181.57	141.167	231.954	-0.46983	0.0403551	0.364512	SET and MYND domain containing 2 [Source:MGI Symbol;Acc:MGI:1915889]
Slc25a45	ENSMUSG00000024818.11	1704.35	2032.18	2014.79	2132.1	2466.1	2754.25	1985.53	-0.268236	0.0405049	0.365057	solute carrier family 25, member 45 [Source:MGI Symbol;Acc:MGI:2147731]
Coro1b	ENSMUSG00000024835.11	14026.6	15314.3	13652.3	15311.6	15802	16362.3	16067.9	-0.143456	0.0405154	0.365057	coronin, actin binding protein 1B [Source:MGI Symbol;Acc:MGI:1345963]
Gm16144	ENSMUSG00000086399.1	109.463	63.2019	102.752	103.884	58.7168	59.0698	62.1636	0.449514	0.0405277	0.365057	predicted gene 16144 [Source:MGI Symbol;Acc:MGI:3801782]
Rasl11b	ENSMUSG00000049907.7	2606.65	2073.02	2296.57	1791.76	1790.41	4038.77	3646.32	-0.409436	0.0405353	0.365057	RAS-like, family 11, member B [Source:MGI Symbol;Acc:MGI:1916189]
Mccc1os	ENSMUSG00000086392.6	31.7136	38.8935	32.8384	61.3412	61.4268	68.0804	89.0703	-0.479816	0.0406108	NA	methylcrotonoyl-Coenzyme A carboxylase 1 (alpha), opposite strand [Source:MGI Symbol;Acc:MGI:3590669]
Hap1	ENSMUSG00000006930.12	435.806	342.263	469.271	333.419	295.391	199.235	339.58	0.395172	0.040611	0.365469	huntingtin-associated protein 1 [Source:MGI Symbol;Acc:MGI:1261831]
Fibin	ENSMUSG00000074971.4	100.256	227.527	818.841	263.174	112.014	90.1065	213.398	0.468449	0.0406982	0.365983	fin bud initiation factor homolog (zebrafish) [Source:MGI Symbol;Acc:MGI:1914856]
Id2	ENSMUSG00000020644.8	97127.5	101117	86314.1	98200.3	111463	123601	97844.6	-0.208668	0.0407555	0.366228	inhibitor of DNA binding 2 [Source:MGI Symbol;Acc:MGI:96397]
Pmel	ENSMUSG00000025359.9	29.6676	45.6999	48.7279	42.5431	45.1668	78.0923	105.771	-0.483239	0.0408133	NA	premelanosome protein [Source:MGI Symbol;Acc:MGI:98301]
Cd101	ENSMUSG00000086564.6	18.4144	15.5574	24.364	25.7237	32.5201	16.0189	138.245	-0.434121	0.0408492	NA	CD101 antigen [Source:MGI Symbol;Acc:MGI:2685862]
Zscan26	ENSMUSG00000022228.10	589.259	852.74	769.054	717.296	619.688	585.692	534.422	0.295276	0.0409217	0.367265	zinc finger and SCAN domain containing 26 [Source:MGI Symbol;Acc:MGI:3531417]
Pak4	ENSMUSG00000030602.9	4769.32	5034.76	5606.89	4386.89	4187.86	4278.05	4475.78	0.184451	0.0409311	0.367265	p21 protein (Cdc42/Rac)-activated kinase 4 [Source:MGI Symbol;Acc:MGI:1917834]
Spc25	ENSMUSG00000005233.13	321.228	391.852	550.838	387.835	524.838	568.672	542.772	-0.34824	0.0410116	0.367606	SPC25, NDC80 kinetochore complex component, homolog (S. cerevisiae) [Source:MGI Symbol;Acc:MGI:1913692]
Fam120aos	ENSMUSG00000097059.1	894.119	822.597	676.895	1004.21	697.375	690.816	604.008	0.310108	0.0410295	0.367606	family with sequence similarity 120A, opposite strand [Source:MGI Symbol;Acc:MGI:1915378]
Sdpr	ENSMUSG00000045954.7	1517.14	4312.32	16512.4	5227.85	2121.03	1207.43	2134.9	0.417646	0.0410742	0.367737	serum deprivation response [Source:MGI Symbol;Acc:MGI:99513]
Ak8	ENSMUSG00000026807.8	129.923	173.076	148.302	177.098	117.434	64.0757	120.616	0.443731	0.0411747	0.367917	adenylate kinase 8 [Source:MGI Symbol;Acc:MGI:1916120]
Tgoln1	ENSMUSG00000056429.4	34838.9	25898.2	29928.5	26997.1	23861.6	24581	26266.5	0.222046	0.0411854	0.367917	trans-golgi network protein [Source:MGI Symbol;Acc:MGI:105080]
Ppp1r37	ENSMUSG00000051403.8	2766.24	2904.37	2598.47	2677.25	2396.55	2560.02	2275.93	0.171746	0.041193	0.367917	protein phosphatase 1, regulatory subunit 37 [Source:MGI Symbol;Acc:MGI:2687042]
Oas1c	ENSMUSG00000001166.14	383.632	391.852	296.605	378.93	418.244	476.563	480.608	-0.303537	0.0412151	0.367917	2'-5' oligoadenylate synthetase 1C [Source:MGI Symbol;Acc:MGI:2149633]
Itga2b	ENSMUSG00000034664.10	499.234	301.425	1027.52	333.419	393.854	197.233	260.716	0.483146	0.041251	0.367968	integrin alpha 2b [Source:MGI Symbol;Acc:MGI:96601]
Rarg	ENSMUSG00000001288.11	2550.39	2652.54	2666.27	2616.89	2977.39	2970.51	2707.37	-0.141261	0.0412926	0.368069	retinoic acid receptor, gamma [Source:MGI Symbol;Acc:MGI:97858]
Ccni	ENSMUSG00000063015.9	11087.5	10884.3	11041.1	11790.4	11743.4	11965.1	12631.3	-0.116706	0.0413336	0.368165	cyclin I [Source:MGI Symbol;Acc:MGI:1341077]
Gm14085	ENSMUSG00000079071.2	527.878	586.319	507.406	652.987	747.962	693.82	645.76	-0.271147	0.0413703	0.368223	predicted gene 14085 [Source:MGI Symbol;Acc:MGI:3702173]
Tmcc3	ENSMUSG00000020023.14	1489.52	1863.97	4805	2299.31	1602.52	1475.74	1735.02	0.457102	0.0414032	0.368247	transmembrane and coiled coil domains 3 [Source:MGI Symbol;Acc:MGI:2442900]
Mertk	ENSMUSG00000014361.5	87.9797	260.586	635.582	276.035	119.24	20.0237	176.285	0.445292	0.0415081	0.36891	c-mer proto-oncogene tyrosine kinase [Source:MGI Symbol;Acc:MGI:96965]
Arg2	ENSMUSG00000021125.6	49.1049	79.7317	200.208	109.821	214.09	116.137	364.632	-0.479671	0.0415992	0.36945	arginase type II [Source:MGI Symbol;Acc:MGI:1330806]
1700102P08Rik	ENSMUSG00000032611.6	63.4272	70.9806	65.6768	100.916	28.9067	47.0556	53.8133	0.473695	0.0416243	NA	RIKEN cDNA 1700102P08 gene [Source:MGI Symbol;Acc:MGI:2148248]
2003-03-01	ENSMUSG00000032656.11	402.047	339.346	312.494	320.557	259.257	289.342	258.861	0.307966	0.0417923	0.370115	membrane-associated ring finger (C3HC4) 3 [Source:MGI Symbol;Acc:MGI:2443667]
Naaa	ENSMUSG00000029413.11	397.955	581.458	850.62	775.669	1175.24	532.629	1530.9	-0.466175	0.0418255	0.370115	N-acylethanolamine acid amidase [Source:MGI Symbol;Acc:MGI:1914361]
Fbxl14	ENSMUSG00000030019.6	5878.27	4024.5	5600.54	4185.05	6365.8	6363.52	5591.94	-0.287039	0.0418397	0.370115	F-box and leucine-rich repeat protein 14 [Source:MGI Symbol;Acc:MGI:2141676]
Dguok	ENSMUSG00000014554.10	2223.02	2284.99	2358.01	2381.42	2548.31	2700.19	2419.74	-0.147377	0.0418656	0.370115	deoxyguanosine kinase [Source:MGI Symbol;Acc:MGI:1351602]
Fgl2	ENSMUSG00000039899.5	66396	49792.4	50707.8	55269.4	50887.6	45576.8	41975.3	0.244138	0.0418733	0.370115	fibrinogen-like protein 2 [Source:MGI Symbol;Acc:MGI:103266]
Mdh1	ENSMUSG00000020321.12	14285.4	14002.6	13016.7	13927.4	14604.2	16611.6	14897.9	-0.15575	0.0418871	0.370115	malate dehydrogenase 1, NAD (soluble) [Source:MGI Symbol;Acc:MGI:97051]
Ciart	ENSMUSG00000038550.7	1048.6	534.786	883.459	749.946	428.181	631.746	614.214	0.403603	0.0418961	0.370115	circadian associated repressor of transcription [Source:MGI Symbol;Acc:MGI:2684975]
Tert	ENSMUSG00000021611.8	32.7366	40.8382	39.1942	31.66	67.7501	45.0532	67.7305	-0.467211	0.0419335	NA	telomerase reverse transcriptase [Source:MGI Symbol;Acc:MGI:1202709]
Rsbn1	ENSMUSG00000044098.11	2296.68	2112.89	1993.61	2220.16	1834.67	1843.18	1995.73	0.177737	0.0419387	0.370115	rosbin, round spermatid basic protein 1 [Source:MGI Symbol;Acc:MGI:2444993]
Fbxo18	ENSMUSG00000058594.12	6008.19	5877.78	5828.29	5753.21	6023.44	6685.9	6463.16	-0.126589	0.0419474	0.370115	F-box protein 18 [Source:MGI Symbol;Acc:MGI:1354699]
Pla2g16	ENSMUSG00000060675.10	2599.49	2956.88	2678.98	2627.78	3002.69	3204.79	2928.19	-0.165644	0.0419938	0.370125	phospholipase A2, group XVI [Source:MGI Symbol;Acc:MGI:2179715]
Capns1	ENSMUSG00000001794.9	5473.15	5991.54	5327.24	5471.24	6471.49	6651.86	5735.76	-0.175247	0.0420093	0.370125	calpain, small subunit 1 [Source:MGI Symbol;Acc:MGI:88266]
Rps12	ENSMUSG00000061983.6	997.444	1037.48	974.559	970.576	1105.68	1074.27	1183.89	-0.171854	0.0421074	0.370722	ribosomal protein S12 [Source:MGI Symbol;Acc:MGI:98105]
Actrt3	ENSMUSG00000037737.6	116.624	60.2849	110.168	72.2243	34.3267	66.0781	48.2464	0.47786	0.0421726	NA	actin related protein T3 [Source:MGI Symbol;Acc:MGI:1923902]
Smurf2	ENSMUSG00000018363.13	2728.39	2636.98	5331.47	3120.49	2270.08	2259.67	2826.13	0.38657	0.042272	0.3716	SMAD specific E3 ubiquitin protein ligase 2 [Source:MGI Symbol;Acc:MGI:1913563]
Xpo4	ENSMUSG00000021952.12	2694.63	2455.15	2297.63	2468.49	2158.97	1843.18	2319.54	0.217394	0.0423263	0.3716	exportin 4 [Source:MGI Symbol;Acc:MGI:1888526]
Ptprn	ENSMUSG00000026204.12	20.4604	16.5297	64.6175	14.8406	11.7434	1.00118	5.56689	0.390065	0.0423299	NA	protein tyrosine phosphatase, receptor type, N [Source:MGI Symbol;Acc:MGI:102765]
Tox2	ENSMUSG00000074607.8	286.445	784.676	2436.4	790.51	441.731	214.253	385.043	0.438844	0.0423637	0.3716	TOX high mobility group box family member 2 [Source:MGI Symbol;Acc:MGI:3611233]
Mprip	ENSMUSG00000005417.14	10481.9	9977.15	13154.4	9731.48	8952.95	8403.93	9980.51	0.228377	0.042405	0.3716	myosin phosphatase Rho interacting protein [Source:MGI Symbol;Acc:MGI:1349438]
Ticrr	ENSMUSG00000046591.9	152.43	115.708	93.2187	112.789	170.73	129.153	279.272	-0.459518	0.0424341	0.3716	TOPBP1-interacting checkpoint and replication regulator [Source:MGI Symbol;Acc:MGI:1924261]
Mllt1	ENSMUSG00000024212.8	5741.19	6128.64	5494.61	5630.53	5501.31	4944.84	4762.48	0.169994	0.0424588	0.3716	myeloid/lymphoid or mixed-lineage leukemia (trithorax homolog, Drosophila); translocated to, 1 [Source:MGI Symbol;Acc:MGI:1927238]
Tmem30a	ENSMUSG00000032328.9	29249.2	25525.8	30181.7	28241.7	26210.3	25474.1	24320.8	0.149336	0.0425463	0.3716	transmembrane protein 30A [Source:MGI Symbol;Acc:MGI:106402]
Pgm1	ENSMUSG00000029171.9	3843.48	4024.5	3790.19	3891.21	3496.81	3684.35	3194.47	0.158287	0.0425503	0.3716	phosphoglucomutase 1 [Source:MGI Symbol;Acc:MGI:97564]
Ttll12	ENSMUSG00000016757.7	1289	1457.53	1336.84	1155.59	1607.03	1398.65	1604.19	-0.222825	0.0425713	0.3716	tubulin tyrosine ligase-like family, member 12 [Source:MGI Symbol;Acc:MGI:3039573]
Dnajc8	ENSMUSG00000054405.11	8091.06	8271.67	7640.75	9068.6	7231.2	7614	7109.85	0.165464	0.0425869	0.3716	DnaJ (Hsp40) homolog, subfamily C, member 8 [Source:MGI Symbol;Acc:MGI:1915848]
Plcxd2	ENSMUSG00000087141.1	2713.05	1902.86	1952.3	1885.75	1369.46	1577.86	1943.77	0.322994	0.0425893	0.3716	phosphatidylinositol-specific phospholipase C, X domain containing 2 [Source:MGI Symbol;Acc:MGI:3647874]
Ttll11	ENSMUSG00000026885.10	885.935	642.715	649.353	667.828	470.638	658.778	470.402	0.347651	0.0425975	0.3716	tubulin tyrosine ligase-like family, member 11 [Source:MGI Symbol;Acc:MGI:1921660]
Atg16l2	ENSMUSG00000047767.13	4807.17	4535.95	3996.75	3928.8	4726.25	5105.03	5102.06	-0.200454	0.0426037	0.3716	autophagy related 16-like 2 (S. cerevisiae) [Source:MGI Symbol;Acc:MGI:1920933]
Grhl3	ENSMUSG00000037188.7	35.8057	35.0041	63.5582	59.3625	18.0667	35.0414	15.7729	0.479595	0.0426237	NA	grainyhead-like 3 (Drosophila) [Source:MGI Symbol;Acc:MGI:2655333]
Tlr13	ENSMUSG00000033777.3	14.3223	31.1148	108.049	122.682	361.334	32.0378	283.912	-0.410399	0.0426418	0.371667	toll-like receptor 13 [Source:MGI Symbol;Acc:MGI:3045213]
Ccny	ENSMUSG00000024286.7	3817.91	3362.34	3414.13	3350.02	3926.8	4149.9	3716.83	-0.172957	0.0429273	0.373506	cyclin Y [Source:MGI Symbol;Acc:MGI:1915224]
Fam53b	ENSMUSG00000030956.12	19119.2	17992.1	15347.2	16950	15522.9	15088.8	14666.9	0.188644	0.0429355	0.373506	family with sequence similarity 53, member B [Source:MGI Symbol;Acc:MGI:1925188]
Bhlhb9	ENSMUSG00000072964.10	598.466	471.584	702.318	711.36	737.121	731.865	952.867	-0.331846	0.0429447	0.373506	basic helix-loop-helix domain containing, class B9 [Source:MGI Symbol;Acc:MGI:1917487]
Mpzl3	ENSMUSG00000070305.7	245.525	194.467	210.801	184.024	329.717	221.261	302.468	-0.370822	0.0429943	0.37367	myelin protein zero-like 3 [Source:MGI Symbol;Acc:MGI:2442647]
Lmntd1	ENSMUSG00000054966.10	8.18416	82.6487	227.75	72.2243	5.42001	12.0142	39.8961	0.380084	0.0431686	NA	lamin tail domain containing 1 [Source:MGI Symbol;Acc:MGI:1921321]
Colgalt2	ENSMUSG00000032649.11	71.6114	172.104	755.283	192.928	69.5568	16.0189	161.44	0.416615	0.0431863	0.374867	collagen beta(1-O)galactosyltransferase 2 [Source:MGI Symbol;Acc:MGI:2138232]
Rom1	ENSMUSG00000071648.3	575.96	649.521	507.406	618.359	743.445	692.818	691.223	-0.254421	0.0432012	0.374867	rod outer segment membrane protein 1 [Source:MGI Symbol;Acc:MGI:97998]
C330007P06Rik	ENSMUSG00000006423.12	3920.21	3338.03	4042.3	4142.51	3378.47	3403.02	3339.21	0.181285	0.0432243	0.374867	RIKEN cDNA C330007P06 gene [Source:MGI Symbol;Acc:MGI:1924894]
Pnrc1	ENSMUSG00000040128.9	49486.5	36635.7	37354.2	38677.6	28367.4	36934.6	34193.7	0.262064	0.0433019	0.375273	proline-rich nuclear receptor coactivator 1 [Source:MGI Symbol;Acc:MGI:1917838]
Adgrg5	ENSMUSG00000061577.8	621.996	561.039	588.973	854.819	941.275	677.801	1041.94	-0.362722	0.0433767	0.375654	G protein-coupled receptor 114 [Source:MGI Symbol;Acc:MGI:2685955]
Rab1b	ENSMUSG00000024870.5	15920.2	17114.1	15392.7	16028.9	17711.7	17746	17214.7	-0.126928	0.0434216	0.375776	RAB1B, member RAS oncogene family [Source:MGI Symbol;Acc:MGI:1923558]
Cdk6	ENSMUSG00000040274.8	475.704	738.004	874.984	639.136	926.822	788.932	1038.23	-0.361868	0.0434751	0.375971	cyclin-dependent kinase 6 [Source:MGI Symbol;Acc:MGI:1277162]
Purb	ENSMUSG00000094483.2	3966.25	3763.92	4772.16	3189.74	4916.85	5157.09	4248.47	-0.266636	0.0435994	0.376779	purine rich element binding protein B [Source:MGI Symbol;Acc:MGI:1338779]
Idh3a	ENSMUSG00000032279.10	5442.46	5273.96	5677.86	5828.4	5968.34	6050.15	5977.92	-0.115058	0.0437164	0.377497	isocitrate dehydrogenase 3 (NAD+) alpha [Source:MGI Symbol;Acc:MGI:1915084]
Cndp2	ENSMUSG00000024644.13	4817.4	5327.44	5311.35	5666.15	5818.38	5745.79	5886.99	-0.142265	0.0437444	0.377497	CNDP dipeptidase 2 (metallopeptidase M20 family) [Source:MGI Symbol;Acc:MGI:1913304]
Ifi204	ENSMUSG00000073489.5	868.544	817.736	691.725	882.522	982.829	966.141	966.784	-0.240632	0.0438449	0.378096	interferon activated gene 204 [Source:MGI Symbol;Acc:MGI:96429]
Tceal1	ENSMUSG00000049536.5	25.5755	113.763	207.623	94.9799	36.1334	26.0308	62.1636	0.453541	0.0438913	0.378172	transcription elongation factor A (SII)-like 1 [Source:MGI Symbol;Acc:MGI:2385317]
Ptger1	ENSMUSG00000019464.5	2969.83	2671.01	2645.08	2419.02	2239.37	2189.59	2499.54	0.198285	0.0439463	0.378172	prostaglandin E receptor 1 (subtype EP1) [Source:MGI Symbol;Acc:MGI:97793]
Plxnd1	ENSMUSG00000030123.12	231.202	515.339	1667.34	615.391	429.084	215.254	387.827	0.47398	0.0439468	0.378172	plexin D1 [Source:MGI Symbol;Acc:MGI:2154244]
Nkd1	ENSMUSG00000031661.8	1682.87	2507.66	7297.54	2867.21	1813.9	1350.6	1760.99	0.474187	0.0440262	0.378588	naked cuticle 1 homolog (Drosophila) [Source:MGI Symbol;Acc:MGI:2135954]
Dctn1	ENSMUSG00000031865.12	14997.5	13030.3	14393.8	13280.4	12983.6	12452.7	11796.2	0.15559	0.0441439	0.379332	dynactin 1 [Source:MGI Symbol;Acc:MGI:107745]
Ephb2	ENSMUSG00000028664.11	34.7827	18.4744	19.0675	11.8725	30.7134	38.0449	76.0809	-0.464499	0.044316	NA	Eph receptor B2 [Source:MGI Symbol;Acc:MGI:99611]
E2f3	ENSMUSG00000016477.14	158.568	171.131	155.718	99.9268	197.83	198.234	227.315	-0.397386	0.044494	0.382071	E2F transcription factor 3 [Source:MGI Symbol;Acc:MGI:1096340]
Dnd1	ENSMUSG00000044595.10	50.128	67.0913	62.4989	69.2562	108.4	88.1041	82.5756	-0.425848	0.0444976	NA	dead end homolog 1 (zebrafish) [Source:MGI Symbol;Acc:MGI:2447763]
Sipa1l2	ENSMUSG00000001995.8	723.275	674.802	1594.25	838	657.628	555.656	669.883	0.428472	0.0446181	0.382867	signal-induced proliferation-associated 1 like 2 [Source:MGI Symbol;Acc:MGI:2676970]
Krtcap3	ENSMUSG00000029149.11	237.341	201.274	330.503	245.365	328.814	325.384	355.353	-0.349957	0.0447064	0.383355	keratinocyte associated protein 3 [Source:MGI Symbol;Acc:MGI:1917065]
Fam83h	ENSMUSG00000046761.9	119.693	171.131	205.505	133.566	203.25	212.251	257.005	-0.39973	0.0448263	0.384112	family with sequence similarity 83, member H [Source:MGI Symbol;Acc:MGI:2145900]
Copg2	ENSMUSG00000025607.12	3072.13	2793.52	3137.66	2918.65	3402.86	3711.38	3059.01	-0.185199	0.0448779	0.384285	coatomer protein complex, subunit gamma 2 [Source:MGI Symbol;Acc:MGI:1858683]
Fam198b	ENSMUSG00000027955.13	137.085	397.686	1122.86	438.293	299.004	166.196	233.81	0.469677	0.0449886	0.384962	family with sequence similarity 198, member B [Source:MGI Symbol;Acc:MGI:1915909]
Mettl21a	ENSMUSG00000025956.7	358.057	380.184	502.11	498.645	524.838	553.654	568.751	-0.304431	0.0450449	0.385055	methyltransferase like 21A [Source:MGI Symbol;Acc:MGI:1914349]
Tesk2	ENSMUSG00000033985.14	376.471	351.014	236.225	360.132	417.341	466.551	443.496	-0.352479	0.0450627	0.385055	testis-specific kinase 2 [Source:MGI Symbol;Acc:MGI:2385204]
Depdc1a	ENSMUSG00000028175.12	87.9797	100.151	129.235	80.1393	187.894	84.0994	253.294	-0.471032	0.0450945	0.385057	DEP domain containing 1a [Source:MGI Symbol;Acc:MGI:1923381]
Tox3	ENSMUSG00000043668.10	6.13812	105.012	218.216	87.0649	30.7134	28.0331	22.2676	0.403965	0.0451453	NA	TOX high mobility group box family member 3 [Source:MGI Symbol;Acc:MGI:3039593]
Wdyhv1	ENSMUSG00000022359.9	883.889	1255.29	952.313	1168.45	1316.16	1483.75	1202.45	-0.294899	0.0452185	0.385846	WDYHV motif containing 1 [Source:MGI Symbol;Acc:MGI:1924023]
Vps37b	ENSMUSG00000066278.6	42832.8	29326.7	34557.6	24141.7	18316	28731.9	26049.3	0.351392	0.0452872	0.386143	vacuolar protein sorting 37B (yeast) [Source:MGI Symbol;Acc:MGI:1916724]
Pelo	ENSMUSG00000042275.8	325.32	370.461	436.433	341.334	283.647	298.352	299.684	0.28633	0.0453422	0.386143	pelota homolog (Drosophila) [Source:MGI Symbol;Acc:MGI:2145154]
Decr2	ENSMUSG00000036775.9	397.955	392.824	462.915	365.079	451.668	526.622	492.67	-0.260401	0.0453526	0.386143	2-4-dienoyl-Coenzyme A reductase 2, peroxisomal [Source:MGI Symbol;Acc:MGI:1347059]
Jarid2	ENSMUSG00000038518.12	7375.97	6051.83	6372.77	7048.3	7658.48	7321.65	7874.37	-0.180676	0.0453801	0.386143	jumonji, AT rich interactive domain 2 [Source:MGI Symbol;Acc:MGI:104813]
Nup98	ENSMUSG00000063550.7	3305.38	2148.87	2932.15	2438.81	2305.31	1923.27	2214.7	0.292631	0.0454647	0.386593	nucleoporin 98 [Source:MGI Symbol;Acc:MGI:109404]
Pxdn	ENSMUSG00000020674.13	484.911	1323.35	4316.66	1474.17	757.898	269.318	619.781	0.415469	0.0456007	0.387372	peroxidasin homolog (Drosophila) [Source:MGI Symbol;Acc:MGI:1916925]
Dld	ENSMUSG00000020664.9	8869.58	7341.15	8207.48	8022.84	8888.82	9095.75	9117.64	-0.156752	0.04562	0.387372	dihydrolipoamide dehydrogenase [Source:MGI Symbol;Acc:MGI:107450]
Psma4	ENSMUSG00000032301.10	4538.11	5028.93	4873.85	4762.85	5194.18	5202.15	5169.79	-0.116177	0.0456679	0.387423	proteasome (prosome, macropain) subunit, alpha type 4 [Source:MGI Symbol;Acc:MGI:1347060]
Glb1l3	ENSMUSG00000031966.6	14.3223	54.4509	219.276	64.3093	36.1334	4.00473	17.6285	0.384442	0.0456716	NA	galactosidase, beta 1 like 3 [Source:MGI Symbol;Acc:MGI:1918143]
Lss	ENSMUSG00000033105.9	1557.04	1819.24	1657.81	1534.52	1478.76	1458.72	1258.12	0.213358	0.0457414	0.387423	lanosterol synthase [Source:MGI Symbol;Acc:MGI:1336155]
Atp13a3	ENSMUSG00000022533.10	4620.98	4011.86	4569.83	4190.99	3504.94	3557.2	4252.18	0.191454	0.0457619	0.387423	ATPase type 13A3 [Source:MGI Symbol;Acc:MGI:2685387]
Zfp276	ENSMUSG00000001065.11	3718.68	3730.86	3254.18	3228.33	2937.65	3102.67	3105.4	0.180387	0.0457737	0.387423	zinc finger protein (C2H2 type) 276 [Source:MGI Symbol;Acc:MGI:1888495]
Ms4a4c	ENSMUSG00000024675.16	356.011	492.975	384.527	670.796	1050.58	467.552	706.068	-0.44129	0.0457849	0.387423	membrane-spanning 4-domains, subfamily A, member 4C [Source:MGI Symbol;Acc:MGI:1927656]
Mvb12a	ENSMUSG00000031813.7	2166.76	2135.25	2002.08	1695.79	2221.3	2673.16	2248.1	-0.239404	0.0460185	0.389129	multivesicular body subunit 12A [Source:MGI Symbol;Acc:MGI:1920961]
Ccl21a	ENSMUSG00000094686.1	20.4604	188.633	406.772	65.2987	37.9401	20.0237	76.0809	0.402416	0.0460876	0.389221	chemokine (C-C motif) ligand 21A (serine) [Source:MGI Symbol;Acc:MGI:1349183]
Ripk2	ENSMUSG00000041135.12	1238.88	1460.45	1491.5	1678.97	1256.54	1200.42	1248.84	0.227308	0.0460932	0.389221	receptor (TNFRSF)-interacting serine-threonine kinase 2 [Source:MGI Symbol;Acc:MGI:1891456]
Ptp4a1	ENSMUSG00000026064.12	9964.21	5967.23	8704.29	7220.45	4884.33	6699.92	6736.87	0.325739	0.046175	0.389524	protein tyrosine phosphatase 4a1 [Source:MGI Symbol;Acc:MGI:1277096]
Ddx41	ENSMUSG00000021494.8	4741.7	4592.35	4219.2	4670.84	4819.29	5326.29	5079.79	-0.156098	0.0461993	0.389524	DEAD (Asp-Glu-Ala-Asp) box polypeptide 41 [Source:MGI Symbol;Acc:MGI:1920185]
Tnfrsf23	ENSMUSG00000037613.12	33.7596	18.4744	56.1431	51.4475	82.2035	40.0473	143.811	-0.462842	0.0462194	NA	tumor necrosis factor receptor superfamily, member 23 [Source:MGI Symbol;Acc:MGI:1930269]
Maoa	ENSMUSG00000025037.6	149.361	371.433	1347.43	550.092	244.804	183.216	351.642	0.463313	0.046225	0.389524	monoamine oxidase A [Source:MGI Symbol;Acc:MGI:96915]
Bok	ENSMUSG00000026278.11	32.7366	31.1148	110.168	22.7556	117.434	100.118	108.554	-0.46249	0.0462469	NA	BCL2-related ovarian killer [Source:MGI Symbol;Acc:MGI:1858494]
Qpctl	ENSMUSG00000030407.1	878.774	810.929	851.68	944.852	671.178	686.811	831.323	0.234567	0.046384	0.390593	glutaminyl-peptide cyclotransferase-like [Source:MGI Symbol;Acc:MGI:1914619]
Tmem97	ENSMUSG00000037278.9	916.626	937.333	974.559	908.246	806.678	732.866	883.28	0.194826	0.0465859	0.39182	transmembrane protein 97 [Source:MGI Symbol;Acc:MGI:1916321]
Dusp5	ENSMUSG00000034765.6	134550	98946	98233.4	93410.8	69833.2	97479.2	86837	0.289155	0.046594	0.39182	dual specificity phosphatase 5 [Source:MGI Symbol;Acc:MGI:2685183]
Fignl1	ENSMUSG00000035455.9	386.701	354.903	449.145	328.472	453.474	488.577	460.197	-0.277537	0.0468313	0.39305	fidgetin-like 1 [Source:MGI Symbol;Acc:MGI:1890648]
Gm12774	ENSMUSG00000082684.1	66.4963	58.3402	55.0838	72.2243	32.5201	32.0378	50.102	0.453824	0.0468668	NA	predicted gene 12774 [Source:MGI Symbol;Acc:MGI:3650283]
Rnf144a	ENSMUSG00000020642.9	536.062	1231.95	4673.65	1329.72	753.382	472.558	669.883	0.427203	0.0468944	0.39305	ring finger protein 144A [Source:MGI Symbol;Acc:MGI:1344401]
Ddx6	ENSMUSG00000032097.9	9705.39	8084.98	8192.65	8512.58	7387.47	7404.75	7948.6	0.174806	0.0468974	0.39305	DEAD (Asp-Glu-Ala-Asp) box polypeptide 6 [Source:MGI Symbol;Acc:MGI:104976]
Ddx31	ENSMUSG00000026806.12	2446.04	2403.62	1987.25	2247.86	1896.1	2048.42	1891.82	0.207688	0.0469009	0.39305	DEAD/H (Asp-Glu-Ala-Asp/His) box polypeptide 31 [Source:MGI Symbol;Acc:MGI:2682639]
Cuedc1	ENSMUSG00000018378.10	4033.77	4525.26	3377.06	4313.67	3560.95	3362.97	3351.27	0.226823	0.0469015	0.39305	CUE domain containing 1 [Source:MGI Symbol;Acc:MGI:2144281]
Gm13340	ENSMUSG00000083563.1	135.039	149.74	202.327	122.682	191.507	203.24	246.799	-0.388933	0.0469455	0.393108	predicted gene 13340 [Source:MGI Symbol;Acc:MGI:3650227]
Bag6	ENSMUSG00000024392.14	6645.54	6821.92	6190.57	7217.48	5784.06	6252.39	5909.26	0.157786	0.0469777	0.393108	BCL2-associated athanogene 6 [Source:MGI Symbol;Acc:MGI:1919439]
Chil5	ENSMUSG00000043873.8	194.374	143.906	159.955	154.342	166.214	270.319	259.788	-0.395865	0.0470052	0.393108	chitinase-like 5 [Source:MGI Symbol;Acc:MGI:2676649]
Vezf1	ENSMUSG00000018377.7	11757.6	10264	10464.9	11172	9924.04	10022.8	9213.21	0.157023	0.0470577	0.393277	vascular endothelial zinc finger 1 [Source:MGI Symbol;Acc:MGI:1313291]
Klhl13	ENSMUSG00000036782.10	70.5884	170.159	601.684	211.726	112.014	52.0615	142.884	0.449237	0.0472014	0.394208	kelch-like 13 [Source:MGI Symbol;Acc:MGI:1914705]
Hexb	ENSMUSG00000021665.7	2996.42	2835.34	2698.04	2996.81	3277.3	3048.6	3287.25	-0.153942	0.0472785	0.394581	hexosaminidase B [Source:MGI Symbol;Acc:MGI:96074]
Tspan13	ENSMUSG00000020577.12	9889.53	11887.8	21953	13219	10352.2	10093.9	10542.8	0.367168	0.0473143	0.39461	tetraspanin 13 [Source:MGI Symbol;Acc:MGI:1913359]
Hopx	ENSMUSG00000059325.11	421.484	832.321	2129.2	978.491	644.078	445.526	672.666	0.468816	0.0474814	0.395303	HOP homeobox [Source:MGI Symbol;Acc:MGI:1916782]
Epas1	ENSMUSG00000024140.9	2897.19	7254.61	26611.8	9802.72	4596.17	2515.97	3665.8	0.418737	0.047486	0.395303	endothelial PAS domain protein 1 [Source:MGI Symbol;Acc:MGI:109169]
Atp2b4	ENSMUSG00000026463.14	3000.52	3096.89	2615.42	2634.7	3289.04	3593.25	3020.04	-0.21173	0.0474948	0.395303	ATPase, Ca++ transporting, plasma membrane 4 [Source:MGI Symbol;Acc:MGI:88111]
Pde12	ENSMUSG00000043702.9	3360.62	2838.25	3055.03	2916.68	2559.15	2845.36	2569.12	0.182027	0.0476274	0.395975	phosphodiesterase 12 [Source:MGI Symbol;Acc:MGI:2443226]
Parvb	ENSMUSG00000022438.6	66.4963	111.819	336.858	98.9374	76.7835	62.0733	66.8027	0.463542	0.0476405	0.395975	parvin, beta [Source:MGI Symbol;Acc:MGI:2153063]
She	ENSMUSG00000046280.9	462.405	667.023	3811.37	1000.26	568.198	338.4	421.228	0.413695	0.0477929	0.396942	src homology 2 domain-containing transforming protein E [Source:MGI Symbol;Acc:MGI:1099462]
Cfp	ENSMUSG00000001128.7	78.7725	112.791	238.343	207.769	409.211	95.1124	532.566	-0.46135	0.047822	0.396942	complement factor properdin [Source:MGI Symbol;Acc:MGI:97545]
Troap	ENSMUSG00000032783.8	15.3453	48.6169	43.4314	13.8512	79.4935	47.0556	77.0087	-0.457291	0.0479649	NA	trophinin associated protein [Source:MGI Symbol;Acc:MGI:1925983]
Pde10a	ENSMUSG00000023868.12	198.466	117.653	131.354	127.629	81.3002	55.0651	121.544	0.455346	0.0480105	0.398042	phosphodiesterase 10A [Source:MGI Symbol;Acc:MGI:1345143]
Stab1	ENSMUSG00000042286.10	418.415	698.138	3065.62	827.117	507.674	216.255	451.846	0.419103	0.0480468	0.398042	stabilin 1 [Source:MGI Symbol;Acc:MGI:2178742]
Spred1	ENSMUSG00000027351.11	1507.93	1585.88	2227.71	1640.38	1560.96	1113.32	1401.93	0.306302	0.0480526	0.398042	sprouty protein with EVH-1 domain 1, related sequence [Source:MGI Symbol;Acc:MGI:2150016]
Tspan7	ENSMUSG00000058254.9	3262.41	8138.46	32498.4	10353.8	4756.96	2414.85	4052.7	0.403169	0.0480957	0.398129	tetraspanin 7 [Source:MGI Symbol;Acc:MGI:1298407]
Hist1h1c	ENSMUSG00000036181.2	57190.9	32938.9	41476	29834.6	19786.7	37073.8	28474.7	0.389029	0.0482359	0.399019	histone cluster 1, H1c [Source:MGI Symbol;Acc:MGI:1931526]
Acadm	ENSMUSG00000062908.9	2491.05	2536.83	2706.52	3013.63	2937.65	2997.54	3166.63	-0.174521	0.0482855	0.39905	acyl-Coenzyme A dehydrogenase, medium chain [Source:MGI Symbol;Acc:MGI:87867]
Mipol1	ENSMUSG00000047022.15	673.147	658.272	610.159	775.669	457.088	658.778	443.496	0.326937	0.0483155	0.39905	mirror-image polydactyly gene 1 homolog (human) [Source:MGI Symbol;Acc:MGI:1920740]
Kcnj8	ENSMUSG00000030247.7	8876.74	10014.1	7588.85	8439.36	7870.76	7648.04	5240.3	0.293062	0.0483413	0.39905	potassium inwardly-rectifying channel, subfamily J, member 8 [Source:MGI Symbol;Acc:MGI:1100508]
Lppr2	ENSMUSG00000040563.10	113.555	155.574	169.488	133.566	113.82	89.1053	98.3484	0.389541	0.0484345	0.39905	lipid phosphate phosphatase-related protein type 2 [Source:MGI Symbol;Acc:MGI:2384575]
Rapgef2	ENSMUSG00000062232.11	6430.7	5569.55	5173.64	5009.2	4885.24	4582.41	4800.52	0.205826	0.0484519	0.39905	Rap guanine nucleotide exchange factor (GEF) 2 [Source:MGI Symbol;Acc:MGI:2659071]
Gab3	ENSMUSG00000032750.10	3929.42	3461.52	3203.33	4158.34	3291.75	3205.79	2692.52	0.243321	0.0484546	0.39905	growth factor receptor bound protein 2-associated protein 3 [Source:MGI Symbol;Acc:MGI:2387324]
Col8a1	ENSMUSG00000068196.4	28.6445	25.2808	190.675	41.5537	218.607	126.149	208.758	-0.433098	0.048497	0.39905	collagen, type VIII, alpha 1 [Source:MGI Symbol;Acc:MGI:88463]
Trmt61a	ENSMUSG00000060950.8	617.904	664.106	722.445	731.148	581.748	578.684	597.513	0.205546	0.0485017	0.39905	tRNA methyltransferase 61A [Source:MGI Symbol;Acc:MGI:2443487]
Rps3a2	ENSMUSG00000062611.4	1426.09	1494.48	1442.77	1436.57	1562.77	1563.85	1642.23	-0.1352	0.0485349	0.399054	ribosomal protein S3A2 [Source:MGI Symbol;Acc:MGI:3642853]
Zfp687	ENSMUSG00000019338.10	4597.45	4148.96	3769	4429.43	3794.01	3351.96	3827.24	0.197571	0.0485826	0.399067	zinc finger protein 687 [Source:MGI Symbol;Acc:MGI:1925516]
Rabl3	ENSMUSG00000022827.11	787.725	813.846	767.995	751.924	887.075	877.036	873.074	-0.171164	0.0486309	0.399067	RAB, member RAS oncogene family-like 3 [Source:MGI Symbol;Acc:MGI:1914907]
Aplnr	ENSMUSG00000044338.9	990.283	2111.92	8563.41	2857.31	1439.92	606.717	1323.06	0.416	0.0486347	0.399067	apelin receptor [Source:MGI Symbol;Acc:MGI:1346086]
Tmem204	ENSMUSG00000024168.7	567.776	2061.36	6145.02	2673.29	1042.45	505.597	1113.38	0.415777	0.0487518	0.399512	transmembrane protein 204 [Source:MGI Symbol;Acc:MGI:3039635]
Zbtb21	ENSMUSG00000046962.12	3028.14	2052.6	2702.28	2063.83	1782.28	1980.34	2107.07	0.290498	0.0487546	0.399512	zinc finger and BTB domain containing 21 [Source:MGI Symbol;Acc:MGI:1927240]
Slc25a39	ENSMUSG00000018677.6	3516.12	3951.58	3946.96	4018.84	4252	4198.96	4222.49	-0.134024	0.0489152	0.400253	solute carrier family 25, member 39 [Source:MGI Symbol;Acc:MGI:1196386]
Hdac5	ENSMUSG00000008855.14	4371.36	4284.12	4270.05	4687.65	3999.97	3845.54	4138.99	0.132233	0.0489463	0.400253	histone deacetylase 5 [Source:MGI Symbol;Acc:MGI:1333784]
Zfp629	ENSMUSG00000045639.11	395.909	334.484	506.347	472.921	378.497	162.192	296.901	0.426077	0.0489524	0.400253	zinc finger protein 629 [Source:MGI Symbol;Acc:MGI:2444524]
Parp14	ENSMUSG00000034422.11	2720.21	2330.69	2657.79	2142.98	2236.66	1979.34	2072.74	0.213649	0.0489764	0.400253	poly (ADP-ribose) polymerase family, member 14 [Source:MGI Symbol;Acc:MGI:1919489]
Mpp7	ENSMUSG00000057440.7	413.3	366.571	459.738	430.378	487.801	510.603	489.887	-0.237931	0.0490632	0.400295	membrane protein, palmitoylated 7 (MAGUK p55 subfamily member 7) [Source:MGI Symbol;Acc:MGI:1922989]
Zbtb32	ENSMUSG00000006310.10	33.7596	47.6445	81.5663	107.842	103.884	64.0757	298.757	-0.451362	0.0490748	0.400295	zinc finger and BTB domain containing 32 [Source:MGI Symbol;Acc:MGI:1891838]
Tpi1	ENSMUSG00000023456.11	6816.38	7370.32	6083.58	6996.85	7841.85	8387.91	7188.71	-0.191883	0.0490801	0.400295	triosephosphate isomerase 1 [Source:MGI Symbol;Acc:MGI:98797]
Xkr8	ENSMUSG00000037752.4	538.108	631.047	526.474	550.092	441.731	494.584	466.691	0.240566	0.0491361	0.400484	X Kell blood group precursor related family member 8 homolog [Source:MGI Symbol;Acc:MGI:2685877]
Atic	ENSMUSG00000026192.10	828.646	822.597	789.181	877.575	948.502	1053.24	886.064	-0.208458	0.0492344	0.400768	5-aminoimidazole-4-carboxamide ribonucleotide formyltransferase/IMP cyclohydrolase [Source:MGI Symbol;Acc:MGI:1351352]
Adat3	ENSMUSG00000035370.7	303.837	352.958	382.408	381.898	281.841	277.328	303.396	0.270949	0.0492415	0.400768	adenosine deaminase, tRNA-specific 3 [Source:MGI Symbol;Acc:MGI:1924344]
Trap1	ENSMUSG00000005981.11	4357.04	4574.85	4592.08	4309.71	4778.64	4727.59	4804.23	-0.10223	0.0492696	0.400768	TNF receptor-associated protein 1 [Source:MGI Symbol;Acc:MGI:1915265]
Nckap5	ENSMUSG00000049690.12	368.287	971.365	3472.4	1059.62	428.181	416.492	606.791	0.422224	0.0493984	0.401547	NCK-associated protein 5 [Source:MGI Symbol;Acc:MGI:2686394]
Krt15	ENSMUSG00000054146.8	6.13812	51.5339	169.488	13.8512	0	10.0118	3.71126	0.311083	0.0494509	NA	keratin 15 [Source:MGI Symbol;Acc:MGI:96689]
Zfp827	ENSMUSG00000071064.10	346.804	498.809	361.222	464.016	608.848	453.536	589.163	-0.339646	0.0495304	0.402352	zinc finger protein 827 [Source:MGI Symbol;Acc:MGI:2444807]
Csrnp1	ENSMUSG00000032515.7	13009.7	8816.18	12269.9	8421.55	6476.01	9063.71	8995.17	0.321063	0.0496356	0.402938	cysteine-serine-rich nuclear protein 1 [Source:MGI Symbol;Acc:MGI:2387989]
2410016O06Rik	ENSMUSG00000046791.7	1074.17	1346.69	1320.95	1317.85	1233.96	894.056	902.765	0.284003	0.0497249	0.403293	RIKEN cDNA 2410016O06 gene [Source:MGI Symbol;Acc:MGI:1919202]
Incenp	ENSMUSG00000024660.8	2301.79	2057.47	1806.11	2104.4	2240.27	2353.78	2722.21	-0.226776	0.049769	0.403293	inner centromere protein [Source:MGI Symbol;Acc:MGI:1313288]
Hykk	ENSMUSG00000035878.10	67.5193	103.068	215.039	145.438	60.5235	56.0662	94.6372	0.465149	0.0497787	0.403293	hydroxylysine kinase 1 [Source:MGI Symbol;Acc:MGI:2443139]
Lincpint	ENSMUSG00000044471.8	864.452	702.028	758.461	764.786	576.328	645.763	705.14	0.24202	0.0499004	0.404011	long intergenic non-protein coding RNA, Trp53 induced transcript [Source:MGI Symbol;Acc:MGI:2673128]
Lactb	ENSMUSG00000032370.7	1289	1286.4	1197.01	1204.07	1330.61	1502.78	1387.08	-0.17557	0.049956	0.404192	lactamase, beta [Source:MGI Symbol;Acc:MGI:1933395]
Elof1	ENSMUSG00000013822.6	1240.92	1355.44	1306.12	1106.12	1532.96	1482.75	1339.77	-0.208179	0.0505684	0.408876	elongation factor 1 homolog (ELF1, S. cerevisiae) [Source:MGI Symbol;Acc:MGI:1913376]
Ccdc34	ENSMUSG00000027160.13	158.568	203.218	233.047	226.567	265.581	246.291	295.973	-0.336325	0.0506203	0.409024	coiled-coil domain containing 34 [Source:MGI Symbol;Acc:MGI:1915451]
Kcnk2	ENSMUSG00000037624.12	3.06906	17.5021	16.9488	3.9575	43.3601	7.00828	67.7305	-0.366091	0.0506367	NA	potassium channel, subfamily K, member 2 [Source:MGI Symbol;Acc:MGI:109366]
Efnb2	ENSMUSG00000001300.12	916.626	1817.3	9631.18	2379.44	1213.18	679.803	1187.6	0.397806	0.0506887	0.409033	ephrin B2 [Source:MGI Symbol;Acc:MGI:105097]
Pald1	ENSMUSG00000020092.8	8783.65	9033.99	10115.3	8657.02	8148.99	8270.77	8484.87	0.13072	0.0507147	0.409033	phosphatase domain containing, paladin 1 [Source:MGI Symbol;Acc:MGI:1351623]
Npr1	ENSMUSG00000027931.9	176.982	369.488	1554	558.007	310.747	158.187	374.837	0.450706	0.0507221	0.409033	natriuretic peptide receptor 1 [Source:MGI Symbol;Acc:MGI:97371]
Rph3al	ENSMUSG00000020847.12	623.019	562.983	728.801	536.241	499.544	513.607	488.031	0.260126	0.0509071	0.410238	rabphilin 3A-like (without C2 domains) [Source:MGI Symbol;Acc:MGI:1923492]
Egln3	ENSMUSG00000035105.5	123.785	65.1466	95.3373	120.704	140.92	135.16	192.986	-0.431541	0.0509614	0.410238	egl-9 family hypoxia-inducible factor 3 [Source:MGI Symbol;Acc:MGI:1932288]
Map1lc3b	ENSMUSG00000031812.13	16909.5	16585.2	18068.5	16139.7	15492.2	16063	15096.5	0.114037	0.0509725	0.410238	microtubule-associated protein 1 light chain 3 beta [Source:MGI Symbol;Acc:MGI:1914693]
Inhba	ENSMUSG00000041324.10	47.0589	27.2254	31.7791	11.8725	50.5868	50.0591	86.2868	-0.457019	0.0509952	NA	inhibin beta-A [Source:MGI Symbol;Acc:MGI:96570]
Specc1l	ENSMUSG00000033444.10	4792.85	4364.82	5042.28	4173.18	3785.88	3392.01	4503.62	0.218853	0.051021	0.410357	sperm antigen with calponin homology and coiled-coil domains 1-like [Source:MGI Symbol;Acc:MGI:1921642]
Edem2	ENSMUSG00000038312.7	5157.04	5161.17	5022.16	5347.57	5550.99	5588.6	5522.36	-0.106859	0.0510838	0.410591	ER degradation enhancer, mannosidase alpha-like 2 [Source:MGI Symbol;Acc:MGI:1915540]
9930022D16Rik	ENSMUSG00000045065.7	731.459	419.077	426.899	567.901	378.497	443.524	302.468	0.391992	0.0511434	0.410799	RIKEN cDNA 9930022D16 gene [Source:MGI Symbol;Acc:MGI:2444178]
Scx	ENSMUSG00000034161.7	16.3683	19.4467	52.9652	20.7769	43.3601	53.0627	78.8643	-0.454957	0.051167	NA	scleraxis [Source:MGI Symbol;Acc:MGI:102934]
Smoc1	ENSMUSG00000021136.10	12.2762	13.6127	55.0838	21.7662	56.9101	30.0355	115.049	-0.424197	0.0512549	NA	SPARC related modular calcium binding 1 [Source:MGI Symbol;Acc:MGI:1929878]
Carns1	ENSMUSG00000075289.4	2431.72	2699.21	1631.33	3015.61	1870.81	1849.18	1855.63	0.332319	0.0513184	0.411933	carnosine synthase 1 [Source:MGI Symbol;Acc:MGI:2147595]
Pea15a	ENSMUSG00000013698.9	17137.6	18804	19849.2	17301.2	16017	17589.8	14314.3	0.17958	0.0514174	0.41225	phosphoprotein enriched in astrocytes 15A [Source:MGI Symbol;Acc:MGI:104799]
Srp72	ENSMUSG00000036323.11	6208.71	5876.81	5361.13	5950.1	6148.1	6690.9	6746.15	-0.158234	0.0514822	0.41225	signal recognition particle 72 [Source:MGI Symbol;Acc:MGI:1333795]
Serpinb9	ENSMUSG00000045827.7	87412.9	68732.6	72302.7	75159.8	61297.6	72482.6	60606.8	0.210606	0.0514922	0.41225	serine (or cysteine) peptidase inhibitor, clade B, member 9 [Source:MGI Symbol;Acc:MGI:106603]
Zdhhc12	ENSMUSG00000015335.13	686.446	744.81	613.336	722.243	869.008	796.942	780.293	-0.226747	0.0514988	0.41225	zinc finger, DHHC domain containing 12 [Source:MGI Symbol;Acc:MGI:1913470]
Cd47	ENSMUSG00000055447.15	32861.4	35607	33008.9	36101.3	38072.9	37322.1	36649.6	-0.122299	0.0515271	0.41225	CD47 antigen (Rh-related antigen, integrin-associated signal transducer) [Source:MGI Symbol;Acc:MGI:96617]
Ctdp1	ENSMUSG00000033323.10	7961.14	6652.73	6694.8	7082.93	6478.72	6211.34	6013.17	0.175064	0.0516453	0.412883	CTD (carboxy-terminal domain, RNA polymerase II, polypeptide A) phosphatase, subunit 1 [Source:MGI Symbol;Acc:MGI:1926953]
Oaz2	ENSMUSG00000040652.12	3441.44	5145.61	10410.8	6066.84	4214.06	3986.71	4374.65	0.411663	0.0516739	0.412883	ornithine decarboxylase antizyme 2 [Source:MGI Symbol;Acc:MGI:109492]
Nefh	ENSMUSG00000020396.8	54.22	79.7317	68.8547	73.2137	92.1402	90.1065	126.183	-0.416177	0.0517157	0.412946	neurofilament, heavy polypeptide [Source:MGI Symbol;Acc:MGI:97309]
Ccnk	ENSMUSG00000021258.9	637.341	575.624	556.134	592.635	485.994	511.604	513.082	0.212179	0.0518036	0.413377	cyclin K [Source:MGI Symbol;Acc:MGI:1276106]
Tspo	ENSMUSG00000041736.6	11376	11806.1	10114.2	10313.2	13176	13177.6	11139.4	-0.193281	0.0518448	0.413435	translocator protein [Source:MGI Symbol;Acc:MGI:88222]
Mis18a	ENSMUSG00000022978.11	3252.18	3349.7	2989.35	3341.12	3626.89	4171.93	3355.91	-0.19724	0.0519118	0.413699	MIS18 kinetochore protein homolog A (S. pombe) [Source:MGI Symbol;Acc:MGI:1913828]
Bach2	ENSMUSG00000040270.13	1844.5	1691.87	1588.95	2083.62	2029.79	1953.31	2608.09	-0.263685	0.0520319	0.414385	BTB and CNC homology 2 [Source:MGI Symbol;Acc:MGI:894679]
Zfp407	ENSMUSG00000048410.13	3175.45	1957.31	2398.26	2329.98	1721.76	2103.49	1998.51	0.299281	0.0520776	0.414478	zinc finger protein 407 [Source:MGI Symbol;Acc:MGI:2685179]
Cacna1a	ENSMUSG00000034656.13	134.016	135.155	157.836	117.736	178.86	214.253	157.729	-0.357608	0.0521165	0.414516	calcium channel, voltage-dependent, P/Q type, alpha 1A subunit [Source:MGI Symbol;Acc:MGI:109482]
Chaf1a	ENSMUSG00000002835.8	404.093	536.73	405.713	497.655	663.048	468.554	673.594	-0.330153	0.0522034	0.414937	chromatin assembly factor 1, subunit A (p150) [Source:MGI Symbol;Acc:MGI:1351331]
Tspan5	ENSMUSG00000028152.7	6071.62	5158.25	5006.27	5118.03	5123.72	4240.01	4273.52	0.2136	0.0523784	0.415942	tetraspanin 5 [Source:MGI Symbol;Acc:MGI:1928096]
Bmpr2	ENSMUSG00000067336.6	1292.07	2373.48	6790.13	2505.1	1606.13	1150.36	1506.77	0.450522	0.0523982	0.415942	bone morphogenetic protein receptor, type II (serine/threonine kinase) [Source:MGI Symbol;Acc:MGI:1095407]
Trbj2-1	ENSMUSG00000076492.1	54.22	52.5062	39.1942	55.405	64.1368	75.0887	97.4206	-0.434102	0.0524515	NA	T cell receptor beta joining 2-1 [Source:MGI Symbol;Acc:MGI:4439728]
Gm7334	ENSMUSG00000044645.7	169.821	163.353	207.623	178.087	140.92	148.175	109.482	0.351807	0.0524725	0.416262	predicted gene 7334 [Source:MGI Symbol;Acc:MGI:3647393]
Pdss1	ENSMUSG00000026784.11	456.267	424.911	376.053	558.996	371.271	313.37	366.487	0.318031	0.0525398	0.416524	prenyl (solanesyl) diphosphate synthase, subunit 1 [Source:MGI Symbol;Acc:MGI:1889278]
Ttc13	ENSMUSG00000037300.14	4432.74	4000.2	3813.49	4187.03	4442.6	4389.19	5199.48	-0.183526	0.0525837	0.416601	tetratricopeptide repeat domain 13 [Source:MGI Symbol;Acc:MGI:2384573]
Chn2	ENSMUSG00000004633.14	5457.81	5386.75	4297.59	5655.26	5971.95	6789.02	5699.57	-0.230937	0.0526856	0.417137	chimerin 2 [Source:MGI Symbol;Acc:MGI:1917243]
3110056K07Rik	ENSMUSG00000085622.5	503.326	509.505	510.584	525.358	388.434	460.544	450.918	0.221812	0.0527226	0.417159	RIKEN cDNA 3110056K07 gene [Source:MGI Symbol;Acc:MGI:1920454]
Oma1	ENSMUSG00000035069.3	1513.05	1439.06	1505.27	1385.12	1559.16	1723.04	1598.63	-0.156525	0.0528671	0.417694	OMA1 homolog, zinc metallopeptidase (S. cerevisiae) [Source:MGI Symbol;Acc:MGI:1914263]
Kansl3	ENSMUSG00000010453.9	9174.44	8218.19	8226.55	8554.13	7438.97	7941.38	7802.93	0.136399	0.0529291	0.417694	KAT8 regulatory NSL complex subunit 3 [Source:MGI Symbol;Acc:MGI:1918055]
Plekhg3	ENSMUSG00000052609.8	2910.49	2774.08	2372.84	2527.85	2340.54	2295.71	2245.31	0.192243	0.0529405	0.417694	pleckstrin homology domain containing, family G (with RhoGef domain) member 3 [Source:MGI Symbol;Acc:MGI:2388284]
Gm13212	ENSMUSG00000078502.7	98.2099	114.736	111.227	92.0118	173.44	119.141	141.956	-0.379401	0.052973	0.417694	predicted gene 13212 [Source:MGI Symbol;Acc:MGI:3651014]
Dip2a	ENSMUSG00000020231.12	823.531	840.099	1028.58	780.616	761.512	694.821	721.84	0.232896	0.0530014	0.417694	DIP2 disco-interacting protein 2 homolog A (Drosophila) [Source:MGI Symbol;Acc:MGI:2385920]
Clic5	ENSMUSG00000023959.8	2066.5	2912.15	9108.95	3473.69	2153.55	1613.91	2287.99	0.453543	0.053005	0.417694	chloride intracellular channel 5 [Source:MGI Symbol;Acc:MGI:1917912]
Ndc1	ENSMUSG00000028614.11	793.863	644.66	733.038	531.294	793.128	773.914	1026.16	-0.312379	0.0530406	0.417694	NDC1 transmembrane nucleoporin [Source:MGI Symbol;Acc:MGI:1920037]
Natd1	ENSMUSG00000018931.3	2064.45	2322.91	2150.39	2255.77	1891.58	2051.42	1951.2	0.152281	0.0530644	0.417694	N-acetyltransferase domain containing 1 [Source:MGI Symbol;Acc:MGI:1344388]
Golm1	ENSMUSG00000021556.8	11593.9	10033.5	9686.27	10786.2	9640.39	9151.81	9119.5	0.166922	0.0531266	0.417913	golgi membrane protein 1 [Source:MGI Symbol;Acc:MGI:1917329]
Sgms2	ENSMUSG00000050931.7	0	23.3361	104.871	17.8087	157.18	56.0662	314.529	-0.327198	0.0532014	0.418231	sphingomyelin synthase 2 [Source:MGI Symbol;Acc:MGI:1921692]
Phf11a	ENSMUSG00000044703.5	754.988	658.272	539.185	609.455	824.745	908.073	691.223	-0.298846	0.0532486	0.418333	PHD finger protein 11A [Source:MGI Symbol;Acc:MGI:1918441]
S100a16	ENSMUSG00000074457.7	254.732	600.904	2282.8	745.988	377.594	289.342	339.58	0.418782	0.0533414	0.418573	S100 calcium binding protein A16 [Source:MGI Symbol;Acc:MGI:1915110]
Col7a1	ENSMUSG00000025650.9	49.1049	92.372	132.413	71.2349	157.18	124.147	144.739	-0.447229	0.0533849	0.418573	collagen, type VII, alpha 1 [Source:MGI Symbol;Acc:MGI:88462]
Gm24366	ENSMUSG00000093124.1	197.443	229.472	202.327	192.928	227.64	262.31	294.118	-0.306177	0.0533908	0.418573	predicted gene, 24366 [Source:MGI Symbol;Acc:MGI:5454143]
Gas7	ENSMUSG00000033066.12	2070.59	1855.22	1657.81	1812.53	2095.74	2310.73	2035.63	-0.208475	0.0534165	0.418573	growth arrest specific 7 [Source:MGI Symbol;Acc:MGI:1202388]
Hs3st1	ENSMUSG00000051022.7	172.89	329.622	1184.3	580.763	220.414	176.208	385.971	0.452409	0.0535332	0.419178	heparan sulfate (glucosamine) 3-O-sulfotransferase 1 [Source:MGI Symbol;Acc:MGI:1201606]
Yipf6	ENSMUSG00000047694.9	2777.5	2413.34	3270.07	2594.14	2315.25	2516.97	2156.24	0.223735	0.0535625	0.419178	Yip1 domain family, member 6 [Source:MGI Symbol;Acc:MGI:1925179]
Foxj2	ENSMUSG00000003154.12	7435.31	6604.11	6975.51	7891.25	6789.47	6105.21	6239.56	0.168325	0.0537544	0.420409	forkhead box J2 [Source:MGI Symbol;Acc:MGI:1926805]
Adgrg6	ENSMUSG00000039116.4	66.4963	316.01	993.626	355.185	157.18	81.0958	244.015	0.42695	0.0538506	0.420892	G protein-coupled receptor 126 [Source:MGI Symbol;Acc:MGI:1916151]
Cd3g	ENSMUSG00000002033.10	371.356	282.95	790.24	582.741	736.218	508.601	2373.35	-0.433963	0.0539845	0.421667	CD3 antigen, gamma polypeptide [Source:MGI Symbol;Acc:MGI:88333]
Heg1	ENSMUSG00000075254.8	1923.28	2573.78	6669.37	2963.18	2052.38	1373.62	2056.04	0.457145	0.0540659	0.421819	HEG homolog 1 (zebrafish) [Source:MGI Symbol;Acc:MGI:1924696]
Brd2	ENSMUSG00000024335.16	29924.3	25986.7	26164.8	24797.7	23585.2	24516	23051.6	0.161125	0.0540918	0.421819	bromodomain containing 2 [Source:MGI Symbol;Acc:MGI:99495]
Lig1	ENSMUSG00000056394.14	1787.22	1633.53	1566.71	1450.42	1685.62	1968.33	1952.12	-0.208161	0.0541078	0.421819	ligase I, DNA, ATP-dependent [Source:MGI Symbol;Acc:MGI:101789]
Zfp689	ENSMUSG00000048921.8	325.32	363.654	306.139	333.419	279.131	266.315	271.85	0.256634	0.0542709	0.422582	zinc finger protein 689 [Source:MGI Symbol;Acc:MGI:1918381]
Cxcl10	ENSMUSG00000034855.10	145.269	92.372	223.513	136.534	166.214	196.232	419.373	-0.453645	0.0543237	0.422582	chemokine (C-X-C motif) ligand 10 [Source:MGI Symbol;Acc:MGI:1352450]
Gpr171	ENSMUSG00000050075.8	17213.3	18699	15590.8	18065	14453.4	16957	12892	0.216624	0.0543241	0.422582	G protein-coupled receptor 171 [Source:MGI Symbol;Acc:MGI:2442043]
Kif4	ENSMUSG00000034311.3	54.22	50.5615	194.912	87.0649	171.634	141.167	258.861	-0.454744	0.0543443	0.422582	kinesin family member 4 [Source:MGI Symbol;Acc:MGI:108389]
Ly6g	ENSMUSG00000022582.4	0	0	11.6523	9.89374	27.1001	4.00473	159.584	-0.259788	0.0544183	NA	lymphocyte antigen 6 complex, locus G [Source:MGI Symbol;Acc:MGI:109440]
Tob2	ENSMUSG00000048546.7	9335.05	8647.97	8131.21	8804.44	7569.05	8167.65	7781.59	0.146204	0.0544502	0.423135	transducer of ERBB2, 2 [Source:MGI Symbol;Acc:MGI:1888525]
Abhd8	ENSMUSG00000007950.8	2594.38	2828.53	2287.04	2526.86	2793.11	2891.42	3086.84	-0.187799	0.054505	0.423291	abhydrolase domain containing 8 [Source:MGI Symbol;Acc:MGI:1918946]
Ipmk	ENSMUSG00000060733.10	2047.06	1581.99	2476.65	1980.73	1751.57	1432.69	1689.55	0.276217	0.0545696	0.423428	inositol polyphosphate multikinase [Source:MGI Symbol;Acc:MGI:1916968]
Cdc37l1	ENSMUSG00000024780.6	2011.26	1798.82	1792.34	1864.97	1742.53	1632.93	1540.17	0.175456	0.0545921	0.423428	cell division cycle 37-like 1 [Source:MGI Symbol;Acc:MGI:1914322]
Nop2	ENSMUSG00000038279.8	2487.98	2569.89	2302.92	2560.5	2207.75	2210.61	2264.8	0.146036	0.0547552	0.424423	NOP2 nucleolar protein [Source:MGI Symbol;Acc:MGI:107891]
Med9	ENSMUSG00000061650.6	443.991	642.715	646.175	608.465	701.891	735.869	731.119	-0.278939	0.0547931	0.424446	mediator complex subunit 9 [Source:MGI Symbol;Acc:MGI:2183151]
Cdan1	ENSMUSG00000027284.13	2625.07	2727.41	2521.14	2434.85	2309.83	2265.68	2388.2	0.141923	0.0548631	0.424718	congenital dyserythropoietic anemia, type I (human) [Source:MGI Symbol;Acc:MGI:1916218]
Pggt1b	ENSMUSG00000024477.3	1629.67	1305.85	1630.27	1442.51	1267.38	1353.6	1228.43	0.208474	0.0550714	0.42606	protein geranylgeranyltransferase type I, beta subunit [Source:MGI Symbol;Acc:MGI:1917514]
Pop7	ENSMUSG00000029715.5	572.891	720.502	591.091	594.614	775.062	833.985	658.749	-0.264878	0.0551814	0.42641	processing of precursor 7, ribonuclease P family, (S. cerevisiae) [Source:MGI Symbol;Acc:MGI:1921347]
RP24-230J14.8	ENSMUSG00000105519.1	146.292	124.459	118.642	158.3	66.8468	89.1053	119.688	0.409802	0.0551866	0.42641	NA
Itga5	ENSMUSG00000000555.6	4037.86	4707.08	5730.83	4525.4	4326.07	3807.5	3869.92	0.22401	0.0552505	0.42661	integrin alpha 5 (fibronectin receptor alpha) [Source:MGI Symbol;Acc:MGI:96604]
Gm37783	ENSMUSG00000102523.1	2.04604	18.4744	100.634	23.745	1.80667	9.01065	1.85563	0.316238	0.0552572	NA	NA
Oxr1	ENSMUSG00000022307.12	15144.8	11394.8	13243.4	13714.7	12059.5	11547.6	10964	0.198589	0.0552825	0.42661	oxidation resistance 1 [Source:MGI Symbol;Acc:MGI:2179326]
Adgrf5	ENSMUSG00000056492.5	2894.12	6008.07	29312	7987.22	4524.81	2049.42	3567.45	0.392386	0.0554293	0.427088	G protein-coupled receptor 116 [Source:MGI Symbol;Acc:MGI:2182928]
Gm9968	ENSMUSG00000055370.3	96.1638	44.7275	75.2105	144.449	42.4568	49.058	52.8855	0.454396	0.0554626	NA	predicted gene 9968 [Source:MGI Symbol;Acc:MGI:3642146]
Eif4a2	ENSMUSG00000022884.11	21590.8	18947.9	18676.6	18531	15444.3	18312.6	17429.9	0.175874	0.0554727	0.427088	eukaryotic translation initiation factor 4A2 [Source:MGI Symbol;Acc:MGI:106906]
Gm6485	ENSMUSG00000089999.1	345.781	222.665	324.147	249.322	193.314	235.278	199.48	0.35672	0.0554761	0.427088	predicted gene 6485 [Source:MGI Symbol;Acc:MGI:3644007]
Dcun1d1	ENSMUSG00000027708.11	4407.17	3802.81	4551.83	4187.03	4755.16	4617.46	4691.04	-0.148111	0.0554846	0.427088	DCN1, defective in cullin neddylation 1, domain containing 1 (S. cerevisiae) [Source:MGI Symbol;Acc:MGI:2150386]
Msmo1	ENSMUSG00000031604.7	1569.31	1499.34	2152.5	1657.2	2186.07	1818.15	2260.16	-0.261748	0.0555507	0.427326	methylsterol monoxygenase 1 [Source:MGI Symbol;Acc:MGI:1913484]
Tjp1	ENSMUSG00000030516.11	590.282	939.278	4200.14	1365.34	782.288	348.412	678.233	0.411053	0.0556695	0.427518	tight junction protein 1 [Source:MGI Symbol;Acc:MGI:98759]
Rpl7a	ENSMUSG00000062647.13	2907.42	3093	3076.22	2612.94	3122.83	3268.86	3405.08	-0.160635	0.0557181	0.427518	ribosomal protein L7A [Source:MGI Symbol;Acc:MGI:1353472]
Ushbp1	ENSMUSG00000034911.7	914.58	1892.17	6325.1	2059.88	1148.14	656.776	1312.86	0.422603	0.0557199	0.427518	Usher syndrome 1C binding protein 1 [Source:MGI Symbol;Acc:MGI:1922920]
Gm13127	ENSMUSG00000070610.4	310.998	321.844	294.486	369.037	388.434	399.472	389.683	-0.256575	0.0557466	0.427518	predicted gene 13127 [Source:MGI Symbol;Acc:MGI:3651260]
Tgfbi	ENSMUSG00000035493.9	170.844	388.935	1128.16	587.688	1752.47	532.629	2388.2	-0.405339	0.055789	0.427518	transforming growth factor, beta induced [Source:MGI Symbol;Acc:MGI:99959]
Trmt10a	ENSMUSG00000004127.9	236.318	239.195	253.173	269.11	274.614	318.376	321.024	-0.265902	0.0557906	0.427518	tRNA methyltransferase 10A [Source:MGI Symbol;Acc:MGI:1920421]
Rnpep	ENSMUSG00000041926.12	3436.32	3517.92	4135.52	3067.06	3896.08	4010.74	4307.85	-0.198447	0.0558585	0.427518	arginyl aminopeptidase (aminopeptidase B) [Source:MGI Symbol;Acc:MGI:2384902]
1700019G17Rik	ENSMUSG00000068299.8	156.522	163.353	168.429	209.747	224.93	246.291	208.758	-0.325019	0.0558608	0.427518	RIKEN cDNA 1700019G17 gene [Source:MGI Symbol;Acc:MGI:1922791]
Gm2a	ENSMUSG00000000594.7	1471.1	1608.25	2533.85	2103.41	2717.23	1788.11	3534.05	-0.375971	0.0558913	0.427518	GM2 ganglioside activator protein [Source:MGI Symbol;Acc:MGI:95762]
E2f7	ENSMUSG00000020185.13	67.5193	28.1978	119.701	43.5325	140.92	92.1088	148.45	-0.451545	0.056039	0.428378	E2F transcription factor 7 [Source:MGI Symbol;Acc:MGI:1289147]
Bcor	ENSMUSG00000040363.11	3655.25	3483.88	3774.3	3531.08	3878.92	4042.78	3791.05	-0.116802	0.0561174	0.428709	BCL6 interacting corepressor [Source:MGI Symbol;Acc:MGI:1918708]
Gm37864	ENSMUSG00000102401.1	76.7265	52.5062	49.7872	33.6387	23.4867	29.0343	34.3292	0.452625	0.0561731	NA	NA
Smap2	ENSMUSG00000032870.8	7796.43	6829.7	6086.76	7746.8	7668.41	8491.03	8634.25	-0.20795	0.0563324	0.430056	small ArfGAP 2 [Source:MGI Symbol;Acc:MGI:1917030]
Tinf2	ENSMUSG00000007589.8	5916.12	4683.75	4454.37	4692.6	3739.81	4422.22	4279.09	0.230095	0.0563807	0.430056	Terf1 (TRF1)-interacting nuclear factor 2 [Source:MGI Symbol;Acc:MGI:107246]
Efhc2	ENSMUSG00000025038.7	74.6804	101.123	86.8629	119.714	117.434	146.173	147.523	-0.392626	0.0563996	0.430056	EF-hand domain (C-terminal) containing 2 [Source:MGI Symbol;Acc:MGI:1921655]
Mbd1	ENSMUSG00000024561.8	4479.8	4624.44	4368.57	4376	4084.88	4229	3647.24	0.151998	0.056466	0.430293	methyl-CpG binding domain protein 1 [Source:MGI Symbol;Acc:MGI:1333811]
Ccdc71l	ENSMUSG00000090946.3	4884.92	4722.64	4764.75	4849.91	4546.49	4395.19	3599.92	0.185969	0.0565942	0.431	coiled-coil domain containing 71 like [Source:MGI Symbol;Acc:MGI:1919373]
2510046G10Rik	ENSMUSG00000066175.2	120.716	148.768	122.879	131.587	100.27	84.0994	103.915	0.35628	0.0566775	0.431365	RIKEN cDNA 2510046G10 gene [Source:MGI Symbol;Acc:MGI:3698051]
Aard	ENSMUSG00000068522.4	40.9208	130.293	584.735	158.3	75.8802	22.026	115.049	0.396781	0.0567132	0.431367	alanine and arginine rich domain containing protein [Source:MGI Symbol;Acc:MGI:2181621]
Sh3kbp1	ENSMUSG00000040990.14	10944.3	10149.3	9398.14	10672.4	10737	11299.3	12958.8	-0.177649	0.0568505	0.431884	SH3-domain kinase binding protein 1 [Source:MGI Symbol;Acc:MGI:1889583]
Rcor2	ENSMUSG00000024968.10	121.739	149.74	175.844	125.651	56.9101	58.0686	137.317	0.444935	0.0568521	0.431884	REST corepressor 2 [Source:MGI Symbol;Acc:MGI:1859854]
Gm26580	ENSMUSG00000097109.1	115.601	124.459	137.709	89.0437	139.114	186.22	162.368	-0.376554	0.0569593	0.432429	predicted gene, 26580 [Source:MGI Symbol;Acc:MGI:5477074]
Syvn1	ENSMUSG00000024807.14	6380.57	6681.9	6525.31	6182.6	5628.68	6182.3	5886.99	0.119252	0.0570426	0.432721	synovial apoptosis inhibitor 1, synoviolin [Source:MGI Symbol;Acc:MGI:1921376]
Fos	ENSMUSG00000021250.10	68608.8	57706.3	70330.3	53939.7	62609.3	77084.1	82802	-0.231605	0.0570687	0.432721	FBJ osteosarcoma oncogene [Source:MGI Symbol;Acc:MGI:95574]
Fosl2	ENSMUSG00000029135.9	7105.89	4105.21	4834.66	3783.37	2925.9	3856.56	4210.43	0.351605	0.057176	0.432967	fos-like antigen 2 [Source:MGI Symbol;Acc:MGI:102858]
Lif	ENSMUSG00000034394.11	76.7265	44.7275	259.529	86.0756	252.934	127.15	388.755	-0.437648	0.0571826	0.432967	leukemia inhibitory factor [Source:MGI Symbol;Acc:MGI:96787]
Ptpn7	ENSMUSG00000031506.8	16865.5	15880.2	14005	16220.8	18911.3	19415.9	15994.6	-0.196862	0.0572601	0.432967	protein tyrosine phosphatase, non-receptor type 7 [Source:MGI Symbol;Acc:MGI:2156893]
Oraov1	ENSMUSG00000031072.10	2555.5	2454.18	2385.55	2586.22	2269.18	2327.75	2096.86	0.15132	0.0572762	0.432967	oral cancer overexpressed 1 [Source:MGI Symbol;Acc:MGI:1919534]
Nol12	ENSMUSG00000033099.6	1327.88	1465.31	1118.62	1070.5	1612.45	1566.85	1369.46	-0.261918	0.0572884	0.432967	nucleolar protein 12 [Source:MGI Symbol;Acc:MGI:2146285]
Ctnnd1	ENSMUSG00000034101.11	46.0359	132.238	473.508	136.534	93.0435	29.0343	89.9981	0.414548	0.0573143	0.432967	catenin (cadherin associated protein), delta 1 [Source:MGI Symbol;Acc:MGI:105100]
Cabyr	ENSMUSG00000024430.10	37.8517	33.0595	28.6012	56.3943	18.97	4.00473	23.1954	0.426063	0.0574138	NA	calcium-binding tyrosine-(Y)-phosphorylation regulated (fibrousheathin 2) [Source:MGI Symbol;Acc:MGI:1918382]
Cpne2	ENSMUSG00000034361.6	120.716	92.372	244.699	166.215	272.807	189.224	291.334	-0.436884	0.0574512	0.433694	copine II [Source:MGI Symbol;Acc:MGI:2387578]
Eef1e1	ENSMUSG00000001707.7	1742.2	1765.76	1863.31	1729.43	1710.92	1535.81	1465.95	0.163806	0.0574818	0.433694	eukaryotic translation elongation factor 1 epsilon 1 [Source:MGI Symbol;Acc:MGI:1913393]
Irf7	ENSMUSG00000025498.11	17034.3	15694.5	11937.3	12935.1	10831	12831.2	11948.4	0.251606	0.0576089	0.434248	interferon regulatory factor 7 [Source:MGI Symbol;Acc:MGI:1859212]
Cdc25b	ENSMUSG00000027330.13	4394.89	4147.02	3748.87	3840.75	4349.56	4501.32	4704.02	-0.162917	0.0576591	0.434248	cell division cycle 25B [Source:MGI Symbol;Acc:MGI:99701]
Pgls	ENSMUSG00000031807.7	1882.36	2467.79	2064.58	2229.06	2339.64	2400.84	2980.14	-0.237484	0.0576844	0.434248	6-phosphogluconolactonase [Source:MGI Symbol;Acc:MGI:1913421]
Ntan1	ENSMUSG00000022681.11	2304.86	2323.89	2137.67	2223.12	2354.99	2766.27	2465.21	-0.168905	0.0576978	0.434248	N-terminal Asn amidase [Source:MGI Symbol;Acc:MGI:108471]
Ifi205	ENSMUSG00000054203.7	6.13812	6.80636	42.3721	17.8087	63.2335	13.0154	103.915	-0.369971	0.0578138	NA	interferon activated gene 205 [Source:MGI Symbol;Acc:MGI:101847]
Irf5	ENSMUSG00000029771.9	895.142	1071.52	1264.81	1418.76	1374.88	1289.52	1801.82	-0.312271	0.0578156	0.434866	interferon regulatory factor 5 [Source:MGI Symbol;Acc:MGI:1350924]
Nudt18	ENSMUSG00000045211.4	3634.79	3583.06	3397.18	3249.1	2677.49	3394.01	2923.55	0.193895	0.0578945	0.435191	nudix (nucleoside diphosphate linked moiety X)-type motif 18 [Source:MGI Symbol;Acc:MGI:2385853]
Vsig10l	ENSMUSG00000070604.3	2607.68	2354.03	1845.31	2316.12	1991.85	1928.28	1720.17	0.251049	0.057939	0.435257	ZV-set and immunoglobulin domain containing 10 like [Source:MGI Symbol;Acc:MGI:1922940]
Prr18	ENSMUSG00000055945.7	111.509	149.74	288.13	153.353	111.11	95.1124	115.977	0.435083	0.0580015	0.435458	proline rich 18 [Source:MGI Symbol;Acc:MGI:2443403]
Nmt2	ENSMUSG00000026643.13	1487.47	1534.35	1665.22	1634.45	1320.68	1523.8	1307.29	0.177704	0.0580733	0.435729	N-myristoyltransferase 2 [Source:MGI Symbol;Acc:MGI:1202298]
Fam129b	ENSMUSG00000026796.13	6826.61	6896.79	10026.3	6577.36	6695.52	5519.52	6173.68	0.268573	0.0581404	0.435859	family with sequence similarity 129, member B [Source:MGI Symbol;Acc:MGI:2442910]
Cdip1	ENSMUSG00000004071.9	2393.87	2437.65	2648.26	2518.95	2623.29	2673.16	2866.95	-0.126003	0.0582073	0.435859	cell death inducing Trp53 target 1 [Source:MGI Symbol;Acc:MGI:1913876]
Milr1	ENSMUSG00000040528.12	11.2532	36.9488	44.4907	64.3093	101.174	46.0544	115.977	-0.433455	0.0582912	NA	mast cell immunoglobulin like receptor 1 [Source:MGI Symbol;Acc:MGI:2685731]
Sytl1	ENSMUSG00000028860.10	1865.99	1923.28	1249.98	1899.6	2040.63	2102.48	2398.4	-0.292597	0.0583354	0.435859	synaptotagmin-like 1 [Source:MGI Symbol;Acc:MGI:1933365]
Slc35g1	ENSMUSG00000044026.2	612.789	583.402	567.786	553.06	749.768	571.675	792.354	-0.261176	0.0583632	0.435859	solute carrier family 35, member G1 [Source:MGI Symbol;Acc:MGI:2444789]
Pfdn1	ENSMUSG00000024346.5	727.367	751.617	706.555	652.987	850.038	899.062	744.108	-0.218913	0.0583731	0.435859	prefoldin 1 [Source:MGI Symbol;Acc:MGI:1914449]
Htra2	ENSMUSG00000068329.9	1395.4	1402.11	1448.07	1328.73	1538.38	1527.8	1507.7	-0.132787	0.058374	0.435859	HtrA serine peptidase 2 [Source:MGI Symbol;Acc:MGI:1928676]
Snrk	ENSMUSG00000038145.13	8796.95	9048.57	11213.8	9812.61	8842.75	8070.53	8678.79	0.173699	0.058374	0.435859	SNF related kinase [Source:MGI Symbol;Acc:MGI:108104]
Pusl1	ENSMUSG00000051557.12	733.505	858.574	851.68	858.777	759.705	662.783	697.717	0.205646	0.0583769	0.435859	pseudouridylate synthase-like 1 [Source:MGI Symbol;Acc:MGI:3047787]
Atp5g2	ENSMUSG00000062683.8	636.318	737.032	726.682	593.625	771.448	795.94	790.499	-0.215197	0.0584488	0.436129	ATP synthase, H+ transporting, mitochondrial F0 complex, subunit C2 (subunit 9) [Source:MGI Symbol;Acc:MGI:1915192]
Srsf2	ENSMUSG00000034120.15	23360.7	22400.7	21044.1	23929	20014.3	21505.4	19747.6	0.142418	0.0585035	0.436264	serine/arginine-rich splicing factor 2 [Source:MGI Symbol;Acc:MGI:98284]
Fnbp1l	ENSMUSG00000039735.12	81.8416	143.906	739.394	190.949	130.08	83.0982	131.75	0.425649	0.0585385	0.436264	formin binding protein 1-like [Source:MGI Symbol;Acc:MGI:1925642]
Vps39	ENSMUSG00000027291.12	4992.34	4706.11	4409.88	4967.65	5040.61	5265.22	5548.34	-0.148578	0.0586064	0.436416	vacuolar protein sorting 39 (yeast) [Source:MGI Symbol;Acc:MGI:2443189]
Gm11346	ENSMUSG00000085603.2	1034.27	1164.86	971.381	1204.07	1193.31	1469.74	1243.27	-0.237105	0.0586476	0.436416	predicted gene 11346 [Source:MGI Symbol;Acc:MGI:1923274]
Atad3a	ENSMUSG00000029036.15	3767.78	3571.39	3354.81	4151.41	3223.1	3300.9	3246.43	0.176113	0.0586663	0.436416	ATPase family, AAA domain containing 3A [Source:MGI Symbol;Acc:MGI:1919214]
Eno2	ENSMUSG00000004267.13	4.09208	11.668	62.4989	9.89374	28.9067	42.0497	169.79	-0.351587	0.0588341	NA	enolase 2, gamma neuronal [Source:MGI Symbol;Acc:MGI:95394]
Gm4955	ENSMUSG00000037849.7	209.719	173.076	113.345	267.131	288.164	311.368	261.644	-0.412537	0.0589234	0.437646	predicted gene 4955 [Source:MGI Symbol;Acc:MGI:3646410]
Gm38062	ENSMUSG00000104488.1	329.412	200.301	261.648	276.035	145.437	231.273	187.419	0.381248	0.0589279	0.437646	NA
Sfrp1	ENSMUSG00000031548.7	12.2762	9.72337	118.642	25.7237	77.6868	46.0544	302.468	-0.360878	0.0589395	0.437646	secreted frizzled-related protein 1 [Source:MGI Symbol;Acc:MGI:892014]
Pphln1	ENSMUSG00000036167.12	2996.42	2618.5	3522.18	2830.6	2661.23	2527.99	2526.44	0.199717	0.0590015	0.43784	periphilin 1 [Source:MGI Symbol;Acc:MGI:1917029]
Ms4a4b	ENSMUSG00000056290.12	57741.3	61833.8	44344.5	58876.7	67857.6	70468.3	60104.8	-0.233915	0.059049	0.437926	membrane-spanning 4-domains, subfamily A, member 4B [Source:MGI Symbol;Acc:MGI:1913083]
Galnt12	ENSMUSG00000039774.9	1735.04	1824.1	1431.12	1676	1899.71	2216.62	1809.24	-0.231732	0.059188	0.438689	UDP-N-acetyl-alpha-D-galactosamine:polypeptide N-acetylgalactosaminyltransferase 12 [Source:MGI Symbol;Acc:MGI:2444664]
E130317F20Rik	ENSMUSG00000091994.1	101.279	135.155	76.2698	75.1924	149.05	148.175	136.389	-0.408449	0.0593474	0.439283	RIKEN cDNA E130317F20 gene [Source:MGI Symbol;Acc:MGI:3041202]
Trem1	ENSMUSG00000042265.10	73.6574	66.1189	336.858	132.576	247.514	114.135	1363.89	-0.345567	0.0593613	0.439283	triggering receptor expressed on myeloid cells 1 [Source:MGI Symbol;Acc:MGI:1930005]
Depdc1b	ENSMUSG00000021697.9	574.937	439.496	382.408	346.281	516.708	551.652	676.378	-0.344003	0.0593938	0.439283	DEP domain containing 1B [Source:MGI Symbol;Acc:MGI:2145425]
Mcph1	ENSMUSG00000039842.12	864.452	800.234	718.207	719.275	813.002	1062.25	931.527	-0.251323	0.0594122	0.439283	microcephaly, primary autosomal recessive 1 [Source:MGI Symbol;Acc:MGI:2443308]
Omg	ENSMUSG00000049612.10	62.4042	41.8105	27.5419	48.4793	8.13002	30.0355	22.2676	0.436031	0.0594709	NA	oligodendrocyte myelin glycoprotein [Source:MGI Symbol;Acc:MGI:106586]
Clic1	ENSMUSG00000007041.9	19884.4	21205.7	20674.4	18654.7	22497.6	24127.5	20475	-0.155206	0.0594719	0.439457	chloride intracellular channel 1 [Source:MGI Symbol;Acc:MGI:2148924]
Sema3c	ENSMUSG00000028780.10	1705.37	3484.86	15974.3	5287.22	2363.12	1329.57	2704.58	0.39488	0.0597039	0.440708	sema domain, immunoglobulin domain (Ig), short basic domain, secreted, (semaphorin) 3C [Source:MGI Symbol;Acc:MGI:107557]
Gbp9	ENSMUSG00000029298.12	6666	5410.08	7708.55	6328.04	7276.36	7245.56	8415.29	-0.219572	0.0597281	0.440708	guanylate-binding protein 9 [Source:MGI Symbol;Acc:MGI:3605620]
Samd9l	ENSMUSG00000047735.13	15775	12914.6	12248.7	13138.9	12316.1	11406.5	11320.3	0.195639	0.0597496	0.440708	sterile alpha motif domain containing 9-like [Source:MGI Symbol;Acc:MGI:1343184]
E230020A03Rik	ENSMUSG00000104420.1	17.3913	51.5339	31.7791	56.3943	89.4302	103.122	45.463	-0.442297	0.0598198	NA	NA
Colq	ENSMUSG00000057606.11	146.292	202.246	502.11	226.567	160.794	76.0899	187.419	0.446485	0.0599167	0.441673	collagen-like tail subunit (single strand of homotrimer) of asymmetric acetylcholinesterase [Source:MGI Symbol;Acc:MGI:1338761]
Lrat	ENSMUSG00000028003.6	34.7827	313.093	787.062	342.323	126.467	72.0852	194.841	0.406784	0.0600176	0.441763	lecithin-retinol acyltransferase (phosphatidylcholine-retinol-O-acyltransferase) [Source:MGI Symbol;Acc:MGI:1891259]
Cbx3	ENSMUSG00000029836.12	1173.4	1044.29	1238.33	1194.17	1231.25	1415.67	1322.14	-0.184138	0.060025	0.441763	chromobox 3 [Source:MGI Symbol;Acc:MGI:108515]
Phf11d	ENSMUSG00000068245.11	110.486	316.01	955.491	401.686	260.161	153.181	200.408	0.438754	0.0600377	0.441763	PHD finger protein 11D [Source:MGI Symbol;Acc:MGI:1277133]
Ptprm	ENSMUSG00000033278.9	696.676	1403.08	6958.56	2128.14	1050.58	634.75	971.423	0.391834	0.0600799	0.441764	protein tyrosine phosphatase, receptor type, M [Source:MGI Symbol;Acc:MGI:102694]
Prickle1	ENSMUSG00000036158.9	454.221	638.826	2708.64	1090.29	480.574	334.395	621.636	0.419746	0.0601228	0.441764	prickle homolog 1 (Drosophila) [Source:MGI Symbol;Acc:MGI:1916034]
Chd4	ENSMUSG00000063870.9	9309.48	8147.21	7335.67	7072.05	9257.38	8982.61	9391.35	-0.202288	0.0601465	0.441764	chromodomain helicase DNA binding protein 4 [Source:MGI Symbol;Acc:MGI:1344380]
Gm16675	ENSMUSG00000097534.1	101.279	77.787	80.507	127.629	142.727	136.161	137.317	-0.389721	0.0602591	0.442324	predicted gene, 16675 [Source:MGI Symbol;Acc:MGI:4439599]
Slc12a5	ENSMUSG00000017740.13	40.9208	59.3126	185.378	59.3625	48.7801	25.0296	38.0404	0.431979	0.0603215	NA	solute carrier family 12, member 5 [Source:MGI Symbol;Acc:MGI:1862037]
Fitm2	ENSMUSG00000048486.6	376.471	562.983	552.956	467.974	417.341	279.33	398.961	0.341984	0.060337	0.44243	fat storage-inducing transmembrane protein 2 [Source:MGI Symbol;Acc:MGI:2444508]
Bdkrb2	ENSMUSG00000021070.5	62.4042	104.04	626.048	92.0118	101.174	5.00591	51.0299	0.357642	0.0603463	0.44243	bradykinin receptor, beta 2 [Source:MGI Symbol;Acc:MGI:102845]
Fam129a	ENSMUSG00000026483.10	3352.44	3023	3772.18	3312.42	3859.05	3472.1	4117.65	-0.180095	0.0603926	0.442504	family with sequence similarity 129, member A [Source:MGI Symbol;Acc:MGI:2137237]
Cdr2l	ENSMUSG00000050910.5	120.716	429.773	1385.57	373.983	304.424	168.199	261.644	0.429292	0.0604875	0.442933	cerebellar degeneration-related protein 2-like [Source:MGI Symbol;Acc:MGI:2684867]
Usp22	ENSMUSG00000042506.12	5358.58	4647.77	5259.44	4190.99	3778.65	3524.16	4824.64	0.241036	0.0605397	0.443049	ubiquitin specific peptidase 22 [Source:MGI Symbol;Acc:MGI:2144157]
Cdc27	ENSMUSG00000020687.10	3098.73	2777	2628.13	2808.83	2402.87	2681.17	2320.47	0.182869	0.0607201	0.443743	cell division cycle 27 [Source:MGI Symbol;Acc:MGI:102685]
Rps7	ENSMUSG00000061477.3	3434.28	3926.3	3640.82	3223.38	3984.61	3729.41	4379.29	-0.178486	0.0607526	0.443743	ribosomal protein S7 [Source:MGI Symbol;Acc:MGI:1333818]
Plscr4	ENSMUSG00000032377.8	5065.99	5281.74	6594.16	5604.8	6644.03	6427.59	6116.16	-0.181739	0.0607586	0.443743	phospholipid scramblase 4 [Source:MGI Symbol;Acc:MGI:2143267]
Sqle	ENSMUSG00000022351.11	421.484	499.781	1047.65	530.305	987.345	754.892	1033.59	-0.40693	0.0607803	0.443743	squalene epoxidase [Source:MGI Symbol;Acc:MGI:109296]
Rab12	ENSMUSG00000023460.9	1029.16	1259.18	2420.51	1350.5	1093.94	907.072	1164.41	0.383798	0.0608892	0.444272	RAB12, member RAS oncogene family [Source:MGI Symbol;Acc:MGI:894284]
Gm37909	ENSMUSG00000104316.1	39.8978	55.4232	32.8384	44.5218	25.2934	13.0154	29.6901	0.444455	0.0610413	NA	NA
Gab1	ENSMUSG00000031714.8	106.394	372.405	1114.39	394.76	230.35	131.155	284.839	0.43014	0.0612657	0.446493	growth factor receptor bound protein 2-associated protein 1 [Source:MGI Symbol;Acc:MGI:108088]
C430049B03Rik	ENSMUSG00000087365.4	83.8876	89.455	128.176	93.9905	69.5568	71.084	63.0915	0.391465	0.0612669	0.446493	RIKEN cDNA C430049B03 gene [Source:MGI Symbol;Acc:MGI:1924903]
Pld3	ENSMUSG00000003363.12	13247.1	14118.3	11590.9	13036	13650.3	15855.7	14666.9	-0.176973	0.0614151	0.446961	phospholipase D family, member 3 [Source:MGI Symbol;Acc:MGI:1333782]
mt-Nd6	ENSMUSG00000064368.1	1270.59	1780.35	1818.82	1566.18	1841	1649.95	2787.16	-0.323935	0.0614285	0.446961	mitochondrially encoded NADH dehydrogenase 6 [Source:MGI Symbol;Acc:MGI:102495]
Cd320	ENSMUSG00000002308.12	237.341	304.342	360.163	309.674	373.077	376.445	388.755	-0.291796	0.061441	0.446961	CD320 antigen [Source:MGI Symbol;Acc:MGI:1860083]
Fam212a	ENSMUSG00000042106.5	221.995	231.416	377.112	322.536	212.284	209.247	205.047	0.360327	0.061488	0.447035	family with sequence similarity 212, member A [Source:MGI Symbol;Acc:MGI:1915426]
Serpina5	ENSMUSG00000041550.4	114.578	70.9806	46.6093	136.534	56.9101	56.0662	28.7623	0.442831	0.0615844	NA	serine (or cysteine) peptidase inhibitor, clade A, member 5 [Source:MGI Symbol;Acc:MGI:107817]
Pcp4l1	ENSMUSG00000038370.6	114.578	194.467	665.242	282.961	140.92	94.1112	209.686	0.437967	0.0616149	0.447433	Purkinje cell protein 4-like 1 [Source:MGI Symbol;Acc:MGI:1913675]
Eif1	ENSMUSG00000035530.10	88176.1	85678.5	78458.3	83224.2	69299.4	83204.3	68636.1	0.173801	0.0616199	0.447433	eukaryotic translation initiation factor 1 [Source:MGI Symbol;Acc:MGI:105125]
Acsbg1	ENSMUSG00000032281.8	431.714	325.733	365.46	494.687	472.444	506.598	574.318	-0.309825	0.0616529	0.447433	acyl-CoA synthetase bubblegum family member 1 [Source:MGI Symbol;Acc:MGI:2385656]
H2-T24	ENSMUSG00000053835.14	1812.79	1871.75	2494.66	1930.27	1624.2	1824.16	1650.58	0.228719	0.0617706	0.447841	histocompatibility 2, T region locus 24 [Source:MGI Symbol;Acc:MGI:95958]
AI987944	ENSMUSG00000056383.9	1264.45	1169.72	1110.15	1284.21	1608.84	1448.71	1227.5	-0.230533	0.0617825	0.447841	expressed sequence AI987944 [Source:MGI Symbol;Acc:MGI:2142079]
Zbtb33	ENSMUSG00000048047.3	264.962	223.638	212.92	234.482	186.087	192.227	177.213	0.291604	0.0620605	0.449485	zinc finger and BTB domain containing 33 [Source:MGI Symbol;Acc:MGI:1927290]
Acp5	ENSMUSG00000001348.11	3790.29	4078.95	3051.85	3657.72	4348.66	4278.05	4088.88	-0.20902	0.0621581	0.449485	acid phosphatase 5, tartrate resistant [Source:MGI Symbol;Acc:MGI:87883]
Icam2	ENSMUSG00000001029.12	4047.07	5324.52	10284.8	5240.72	4766.9	4290.07	4027.65	0.379037	0.0621776	0.449485	intercellular adhesion molecule 2 [Source:MGI Symbol;Acc:MGI:96394]
Ctdnep1	ENSMUSG00000018559.13	1971.36	2210.12	2007.38	2165.74	2321.57	2561.03	2190.57	-0.173262	0.0622029	0.449485	CTD nuclear envelope phosphatase 1 [Source:MGI Symbol;Acc:MGI:1914431]
Psmd10	ENSMUSG00000031429.11	1710.49	1796.88	1712.89	1767.02	2201.43	1908.25	1820.37	-0.176869	0.0622321	0.449485	proteasome (prosome, macropain) 26S subunit, non-ATPase, 10 [Source:MGI Symbol;Acc:MGI:1858898]
Zfyve19	ENSMUSG00000068580.8	1399.49	1309.74	1158.88	1142.73	1464.31	1656.96	1332.34	-0.231592	0.0622621	0.449485	zinc finger, FYVE domain containing 19 [Source:MGI Symbol;Acc:MGI:1919258]
Tmem219	ENSMUSG00000060538.11	487.98	608.683	486.22	600.55	661.241	643.761	658.749	-0.244561	0.0622989	0.449485	transmembrane protein 219 [Source:MGI Symbol;Acc:MGI:1915992]
Cpsf3	ENSMUSG00000054309.8	5657.3	5368.27	5257.32	6097.51	4810.26	5139.07	5106.7	0.147372	0.0623046	0.449485	cleavage and polyadenylation specificity factor 3 [Source:MGI Symbol;Acc:MGI:1859328]
Esd	ENSMUSG00000021996.13	4632.23	4921.97	4317.72	4470.98	5256.51	5509.51	4703.1	-0.168217	0.0624485	0.450126	esterase D/formylglutathione hydrolase [Source:MGI Symbol;Acc:MGI:95421]
Ctr9	ENSMUSG00000005609.12	6195.41	6026.55	5821.93	6295.39	5591.64	5640.66	5584.52	0.11116	0.0624672	0.450126	Ctr9, Paf1/RNA polymerase II complex component, homolog (S. cerevisiae) [Source:MGI Symbol;Acc:MGI:109345]
Arhgap10	ENSMUSG00000037148.7	1818.93	1498.37	1379.21	1654.23	1231.25	1488.76	1221.01	0.246038	0.0625059	0.450138	Rho GTPase activating protein 10 [Source:MGI Symbol;Acc:MGI:1925764]
Ufsp2	ENSMUSG00000031634.9	1387.21	1349.6	1318.83	1284.21	1476.05	1519.8	1428.84	-0.145216	0.0625607	0.450267	UFM1-specific peptidase 2 [Source:MGI Symbol;Acc:MGI:1913679]
RP23-407I6.4	ENSMUSG00000106375.1	1215.35	820.653	917.356	767.754	551.938	689.815	853.59	0.337184	0.0626515	0.450424	NA
Cpd	ENSMUSG00000020841.5	1086.45	1562.55	4890.8	2315.14	1207.76	895.057	1401	0.436363	0.0626564	0.450424	carboxypeptidase D [Source:MGI Symbol;Acc:MGI:107265]
Eya2	ENSMUSG00000017897.15	4197.45	4086.73	3288.08	3809.09	3233.94	3574.22	2996.84	0.215311	0.0627319	0.450615	eyes absent 2 homolog (Drosophila) [Source:MGI Symbol;Acc:MGI:109341]
Ccdc117	ENSMUSG00000020482.4	7006.66	6701.35	11199	7400.52	6073.12	7066.35	5989.05	0.29055	0.062757	0.450615	coiled-coil domain containing 117 [Source:MGI Symbol;Acc:MGI:2144383]
Etnk2	ENSMUSG00000070644.10	304.86	341.29	189.615	243.386	377.594	432.511	319.169	-0.372222	0.0628438	0.450729	ethanolamine kinase 2 [Source:MGI Symbol;Acc:MGI:2443760]
Fcgr3	ENSMUSG00000059498.10	1832.23	2516.41	2285.98	2506.08	2911.45	2446.89	2787.16	-0.235301	0.0628468	0.450729	Fc receptor, IgG, low affinity III [Source:MGI Symbol;Acc:MGI:95500]
Gpsm2	ENSMUSG00000027883.12	241.433	221.693	397.239	230.524	337.847	301.356	591.946	-0.410079	0.0629029	0.45083	G-protein signalling modulator 2 (AGS3-like, C. elegans) [Source:MGI Symbol;Acc:MGI:1923373]
Ssfa2	ENSMUSG00000027007.13	1637.85	1413.78	1853.78	1534.52	1301.71	1269.5	1522.55	0.216978	0.0629716	0.45083	sperm specific antigen 2 [Source:MGI Symbol;Acc:MGI:1917849]
Gm12250	ENSMUSG00000082292.3	494.118	545.481	860.154	726.201	573.618	478.565	360.92	0.365189	0.0629719	0.45083	predicted gene 12250 [Source:MGI Symbol;Acc:MGI:3649299]
Wdr48	ENSMUSG00000032512.6	4615.86	4416.36	4116.45	4537.27	4142.7	3900.61	3919.09	0.140082	0.0630197	0.450907	WD repeat domain 48 [Source:MGI Symbol;Acc:MGI:1914811]
Smc5	ENSMUSG00000024943.8	9789.27	8733.53	8311.29	8958.78	7821.98	8528.08	7232.32	0.174186	0.0630607	0.450936	structural maintenance of chromosomes 5 [Source:MGI Symbol;Acc:MGI:2385088]
Lrrc75a	ENSMUSG00000046417.11	1571.36	1739.51	1444.89	1490	1818.41	2090.47	1615.33	-0.22612	0.0632485	0.451599	leucine rich repeat containing 75A [Source:MGI Symbol;Acc:MGI:2682293]
Clic4	ENSMUSG00000037242.8	12483.9	14519.9	36087.3	18383.6	12596.1	9017.65	11932.6	0.440297	0.0632748	0.451599	chloride intracellular channel 4 (mitochondrial) [Source:MGI Symbol;Acc:MGI:1352754]
Vangl2	ENSMUSG00000026556.12	57.2891	66.1189	273.3	126.64	39.7467	20.0237	92.7816	0.411837	0.0632993	0.451599	vang-like 2 (van gogh, Drosophila) [Source:MGI Symbol;Acc:MGI:2135272]
Polr3d	ENSMUSG00000000776.9	1488.49	1334.05	1345.31	1361.38	1261.96	1245.47	1149.56	0.168977	0.0633666	0.451599	polymerase (RNA) III (DNA directed) polypeptide D [Source:MGI Symbol;Acc:MGI:1914315]
Nedd8	ENSMUSG00000010376.11	2333.51	2777.97	2419.45	2328.99	2903.32	2994.54	2564.48	-0.190621	0.0633884	0.451599	neural precursor cell expressed, developmentally down-regulated gene 8 [Source:MGI Symbol;Acc:MGI:97301]
Poli	ENSMUSG00000038425.14	1115.09	1019.98	840.027	1068.52	1103.88	1198.42	1336.05	-0.243911	0.0634092	0.451599	polymerase (DNA directed), iota [Source:MGI Symbol;Acc:MGI:1347081]
Nfkbia	ENSMUSG00000021025.7	33860.9	24113	35069.3	27231.5	27768.5	46793.3	40235.6	-0.304985	0.0634363	0.451599	nuclear factor of kappa light polypeptide gene enhancer in B cells inhibitor, alpha [Source:MGI Symbol;Acc:MGI:104741]
Ndel1	ENSMUSG00000018736.11	11600	9148.72	10492.4	9936.29	8494.06	9563.3	8975.69	0.178462	0.0635042	0.451599	nuclear distribution gene E-like homolog 1 (A. nidulans) [Source:MGI Symbol;Acc:MGI:1932915]
Gpr25	ENSMUSG00000052759.7	176.982	177.938	143.006	216.673	131.887	148.175	81.6478	0.398992	0.0635119	0.451599	G protein-coupled receptor 25 [Source:MGI Symbol;Acc:MGI:2686146]
Matr3	ENSMUSG00000037236.11	19530.5	15777.1	18155.4	18840.7	15149.8	16552.6	16306.4	0.16403	0.0635241	0.451599	matrin 3 [Source:MGI Symbol;Acc:MGI:1298379]
Bcl6b	ENSMUSG00000000317.8	109.463	396.714	1792.34	431.367	225.834	122.144	195.769	0.362866	0.0636385	0.452149	B cell CLL/lymphoma 6, member B [Source:MGI Symbol;Acc:MGI:1278332]
Fzd6	ENSMUSG00000022297.11	155.499	315.037	1034.94	341.334	310.747	168.199	176.285	0.434339	0.0637824	0.452689	frizzled homolog 6 (Drosophila) [Source:MGI Symbol;Acc:MGI:108474]
Cmtr2	ENSMUSG00000046441.5	472.635	533.813	555.075	551.081	480.574	401.474	448.135	0.227669	0.0637889	0.452689	cap methyltransferase 2 [Source:MGI Symbol;Acc:MGI:2384580]
2700089E24Rik	ENSMUSG00000072704.5	4003.08	4348.29	5366.43	4306.75	3844.59	4066.8	3780.85	0.191593	0.0638754	0.453039	RIKEN cDNA 2700089E24 gene [Source:MGI Symbol;Acc:MGI:1914379]
Slfn1	ENSMUSG00000078763.2	42.9668	42.7828	296.605	172.151	408.307	104.123	1003.9	-0.340584	0.0639772	0.453497	schlafen 1 [Source:MGI Symbol;Acc:MGI:1313259]
Serpina1b	ENSMUSG00000071178.8	20.4604	23.3361	209.742	55.405	23.4867	8.00946	31.5457	0.364737	0.0641523	NA	serine (or cysteine) preptidase inhibitor, clade A, member 1B [Source:MGI Symbol;Acc:MGI:891970]
Usp36	ENSMUSG00000033909.14	4790.8	3953.52	3847.39	4461.09	3669.35	3933.65	3388.38	0.20158	0.0641784	0.454608	ubiquitin specific peptidase 36 [Source:MGI Symbol;Acc:MGI:1919594]
Slc41a3	ENSMUSG00000030089.12	870.59	724.391	577.32	894.394	970.182	1036.22	904.62	-0.298088	0.0642975	0.454608	solute carrier family 41, member 3 [Source:MGI Symbol;Acc:MGI:1918949]
Eng	ENSMUSG00000026814.13	1979.54	4456.22	20563.2	5796.74	3241.17	1866.2	2763.03	0.384155	0.0643331	0.454608	endoglin [Source:MGI Symbol;Acc:MGI:95392]
Pygb	ENSMUSG00000033059.7	8512.55	7763.14	7715.96	7631.04	8543.74	8625.19	8599.92	-0.122583	0.064355	0.454608	brain glycogen phosphorylase [Source:MGI Symbol;Acc:MGI:97828]
Smcr8	ENSMUSG00000049323.8	1940.67	1509.07	1813.53	1290.14	1327.9	1182.4	1447.39	0.273357	0.0643574	0.454608	Smith-Magenis syndrome chromosome region, candidate 8 homolog (human) [Source:MGI Symbol;Acc:MGI:2444720]
Tie1	ENSMUSG00000033191.11	1100.77	2444.46	10131.2	3156.1	1867.19	825.976	1482.65	0.388311	0.0643973	0.454608	tyrosine kinase with immunoglobulin-like and EGF-like domains 1 [Source:MGI Symbol;Acc:MGI:99906]
Prf1	ENSMUSG00000037202.5	213844	200547	162557	178975	160124	178316	138404	0.22707	0.0644057	0.454608	perforin 1 (pore forming protein) [Source:MGI Symbol;Acc:MGI:97551]
Gm336	ENSMUSG00000101439.1	123.785	90.4274	96.3966	111.799	141.824	201.238	117.833	-0.393874	0.0644324	0.454608	NA
Ankrd44	ENSMUSG00000052331.11	22787.8	16629.9	18078.1	17621.7	16322.4	16454.4	15175.4	0.212953	0.0646197	0.455666	ankyrin repeat domain 44 [Source:MGI Symbol;Acc:MGI:3045243]
D17Wsu92e	ENSMUSG00000056692.9	2636.32	3126.06	2883.42	2366.58	2990.04	3265.86	3256.63	-0.198276	0.0646666	0.455733	DNA segment, Chr 17, Wayne State University 92, expressed [Source:MGI Symbol;Acc:MGI:106281]
A830080D01Rik	ENSMUSG00000044150.9	4144.25	3373.04	3295.49	3764.57	3114.7	3313.92	3003.34	0.197035	0.0647094	0.455771	RIKEN cDNA A830080D01 gene [Source:MGI Symbol;Acc:MGI:2685992]
Cmc2	ENSMUSG00000014633.12	299.745	414.216	425.84	355.185	430.891	488.577	469.475	-0.279425	0.0648664	0.456613	COX assembly mitochondrial protein 2 [Source:MGI Symbol;Acc:MGI:1913781]
Hist1h2bc	ENSMUSG00000018102.4	937.086	509.505	904.645	434.335	233.964	546.646	508.443	0.425353	0.0649242	0.456651	histone cluster 1, H2bc [Source:MGI Symbol;Acc:MGI:1915274]
Tbc1d22a	ENSMUSG00000051864.9	2994.38	2739.07	3242.53	2504.11	2303.5	2770.27	2180.37	0.223381	0.0649492	0.456651	TBC1 domain family, member 22a [Source:MGI Symbol;Acc:MGI:1289265]
Itfg3	ENSMUSG00000024187.11	2724.3	2901.45	2748.89	2342.84	2951.2	3241.83	2926.33	-0.179659	0.0649842	0.456651	integrin alpha FG-GAP repeat containing 3 [Source:MGI Symbol;Acc:MGI:2146854]
Cdc42ep4	ENSMUSG00000041598.7	982.099	1553.79	3772.18	1589.92	1374.88	854.009	1336.98	0.428632	0.0651779	0.457559	CDC42 effector protein (Rho GTPase binding) 4 [Source:MGI Symbol;Acc:MGI:1929760]
Pacsin2	ENSMUSG00000016664.11	17713.6	15784	16475.3	15836.9	14948.4	15673.5	13359.6	0.155099	0.0651885	0.457559	protein kinase C and casein kinase substrate in neurons 2 [Source:MGI Symbol;Acc:MGI:1345153]
Gdpd1	ENSMUSG00000061666.6	115.601	184.744	897.23	258.227	133.694	117.138	219.892	0.421496	0.0653037	0.457752	glycerophosphodiester phosphodiesterase domain containing 1 [Source:MGI Symbol;Acc:MGI:1913819]
Cetn2	ENSMUSG00000031347.9	5454.74	5616.22	5374.9	5548.41	6210.43	6725.95	5494.52	-0.160328	0.0653268	0.457752	centrin 2 [Source:MGI Symbol;Acc:MGI:1347085]
Plekhg1	ENSMUSG00000040624.14	97.1869	184.744	1050.83	269.11	122.854	84.0994	247.727	0.404488	0.0653287	0.457752	pleckstrin homology domain containing, family G (with RhoGef domain) member 1 [Source:MGI Symbol;Acc:MGI:2676551]
Cebpg	ENSMUSG00000056216.8	1980.57	2299.58	2890.84	2355.7	1943.07	2062.44	2016.14	0.222315	0.0654382	0.458216	CCAAT/enhancer binding protein (C/EBP), gamma [Source:MGI Symbol;Acc:MGI:104982]
Rpl5	ENSMUSG00000058558.9	3231.72	3684.19	3273.25	3107.62	3627.79	3634.29	3808.68	-0.151239	0.0654778	0.458216	ribosomal protein L5 [Source:MGI Symbol;Acc:MGI:102854]
Cx3cl1	ENSMUSG00000031778.9	220.972	808.985	2895.08	829.096	380.304	192.227	479.681	0.371238	0.0655214	0.458216	chemokine (C-X3-C motif) ligand 1 [Source:MGI Symbol;Acc:MGI:1097153]
Inpp5a	ENSMUSG00000025477.10	1152.94	1550.88	3384.47	1464.27	1168.01	995.176	1496.57	0.411515	0.0655815	0.458216	inositol polyphosphate-5-phosphatase A [Source:MGI Symbol;Acc:MGI:2686961]
Ldb2	ENSMUSG00000039706.8	372.379	1036.51	4703.31	1165.48	663.048	374.442	580.813	0.371907	0.0655961	0.458216	LIM domain binding 2 [Source:MGI Symbol;Acc:MGI:894670]
Cfl2	ENSMUSG00000062929.7	1836.32	1740.48	2389.79	1857.06	1718.14	1573.86	1672.85	0.217639	0.0656275	0.458216	cofilin 2, muscle [Source:MGI Symbol;Acc:MGI:101763]
Cirh1a	ENSMUSG00000041438.7	2219.95	2371.53	2342.12	2467.5	2040.63	2200.6	2156.24	0.131625	0.0656872	0.458216	cirrhosis, autosomal recessive 1A (human) [Source:MGI Symbol;Acc:MGI:1096573]
Rps8	ENSMUSG00000047675.12	1892.59	2266.52	2069.88	2135.07	2304.41	2227.63	2515.31	-0.166783	0.0657657	0.458216	ribosomal protein S8 [Source:MGI Symbol;Acc:MGI:98166]
Scarf1	ENSMUSG00000038188.14	180.051	323.788	1202.31	367.058	345.074	200.237	186.491	0.430189	0.0657874	0.458216	scavenger receptor class F, member 1 [Source:MGI Symbol;Acc:MGI:2449455]
Ccz1	ENSMUSG00000029617.10	3206.14	2991.88	2868.59	3173.91	3333.31	3426.05	3328.07	-0.137494	0.0657984	0.458216	CCZ1 vacuolar protein trafficking and biogenesis associated [Source:MGI Symbol;Acc:MGI:2141070]
Wibg	ENSMUSG00000064030.11	601.536	652.438	560.371	626.274	700.085	748.885	671.738	-0.204468	0.0658086	0.458216	within bgcn homolog (Drosophila) [Source:MGI Symbol;Acc:MGI:1925678]
Fndc4	ENSMUSG00000038552.11	348.85	152.657	340.036	207.769	124.66	137.162	222.676	0.424628	0.0658845	0.458275	fibronectin type III domain containing 4 [Source:MGI Symbol;Acc:MGI:1917195]
Cpsf2	ENSMUSG00000041781.8	3615.35	3316.64	3235.11	3700.26	3613.34	3986.71	4004.45	-0.157426	0.0658923	0.458275	cleavage and polyadenylation specific factor 2 [Source:MGI Symbol;Acc:MGI:1861601]
Psma5	ENSMUSG00000068749.6	3069.06	3617.09	3525.36	3165.01	3913.25	3953.67	3447.76	-0.172861	0.0660197	0.458722	proteasome (prosome, macropain) subunit, alpha type 5 [Source:MGI Symbol;Acc:MGI:1347009]
Emp2	ENSMUSG00000022505.8	1734.02	5742.62	21022.9	7419.32	3245.68	1573.86	3545.18	0.376574	0.0660319	0.458722	epithelial membrane protein 2 [Source:MGI Symbol;Acc:MGI:1098726]
Aldh4a1	ENSMUSG00000028737.12	720.206	834.265	728.801	670.796	652.208	550.651	654.11	0.230285	0.0661306	0.458904	aldehyde dehydrogenase 4 family, member A1 [Source:MGI Symbol;Acc:MGI:2443883]
Ywhah	ENSMUSG00000018965.11	21519.2	19850.3	22307.9	18718	22466.8	24824.3	21609.8	-0.158017	0.0661368	0.458904	tyrosine 3-monooxygenase/tryptophan 5-monooxygenase activation protein, eta polypeptide [Source:MGI Symbol;Acc:MGI:109194]
Plekha1	ENSMUSG00000040268.13	7663.44	6591.47	8590.95	7276.85	6846.38	6244.38	6731.3	0.17422	0.066171	0.458904	pleckstrin homology domain containing, family A (phosphoinositide binding specific) member 1 [Source:MGI Symbol;Acc:MGI:2442213]
Ston1	ENSMUSG00000033855.12	16.3683	69.0359	154.658	39.575	35.2301	9.01065	24.1232	0.382728	0.0662663	NA	stonin 1 [Source:MGI Symbol;Acc:MGI:1924307]
Pde4b	ENSMUSG00000028525.13	13146.8	11651.5	20912.8	12951.9	9988.18	10608.5	13393.9	0.309768	0.0663	0.459461	phosphodiesterase 4B, cAMP specific [Source:MGI Symbol;Acc:MGI:99557]
Bcl11b	ENSMUSG00000048251.12	1076.22	1134.72	1531.75	1104.14	1235.76	1063.26	3457.04	-0.420974	0.0663267	0.459461	B cell leukemia/lymphoma 11B [Source:MGI Symbol;Acc:MGI:1929913]
Mpdu1	ENSMUSG00000018761.11	1779.03	2138.17	1629.21	1859.03	2090.32	2280.69	2087.58	-0.208762	0.0664582	0.459515	mannose-P-dolichol utilization defect 1 [Source:MGI Symbol;Acc:MGI:1346040]
0610007P14Rik	ENSMUSG00000021252.8	1775.96	2131.36	1874.97	1952.04	2293.57	2325.75	2002.23	-0.187328	0.0664765	0.459515	RIKEN cDNA 0610007P14 gene [Source:MGI Symbol;Acc:MGI:1915571]
Serpinb1a	ENSMUSG00000044734.12	231.202	369.488	758.461	616.38	864.492	366.433	1469.66	-0.435506	0.0664805	0.459515	serine (or cysteine) peptidase inhibitor, clade B, member 1a [Source:MGI Symbol;Acc:MGI:1913472]
Stx12	ENSMUSG00000028879.4	3060.87	3016.19	4916.23	3325.29	2953	2919.45	2662.83	0.283071	0.0664854	0.459515	syntaxin 12 [Source:MGI Symbol;Acc:MGI:1931027]
Tmem160	ENSMUSG00000019158.8	1443.48	1581.02	1288.11	1456.36	1653.1	1820.15	1537.39	-0.204029	0.0665715	0.459691	transmembrane protein 160 [Source:MGI Symbol;Acc:MGI:1916344]
Ces2e	ENSMUSG00000031886.10	8.18416	70.0083	258.47	59.3625	46.9734	10.0118	11.1338	0.341678	0.0666694	NA	carboxylesterase 2E [Source:MGI Symbol;Acc:MGI:2443170]
D3Ertd751e	ENSMUSG00000025766.11	559.592	616.462	615.455	724.222	579.941	512.606	413.806	0.280475	0.0666849	0.459691	DNA segment, Chr 3, ERATO Doi 751, expressed [Source:MGI Symbol;Acc:MGI:1289213]
Zfp574	ENSMUSG00000045252.10	3080.31	3030.78	2736.18	3060.13	2771.43	2697.19	2396.55	0.170694	0.0666956	0.459691	zinc finger protein 574 [Source:MGI Symbol;Acc:MGI:2442951]
Ppp6r3	ENSMUSG00000024908.11	7545.79	6435.9	7177.84	6521.95	6494.98	5674.7	6247.91	0.160983	0.066761	0.459691	protein phosphatase 6, regulatory subunit 3 [Source:MGI Symbol;Acc:MGI:1921807]
Arpc5l	ENSMUSG00000026755.11	5614.33	5720.26	4982.96	5864.02	6040.6	6745.97	5937.09	-0.168742	0.0667785	0.459691	actin related protein 2/3 complex, subunit 5-like [Source:MGI Symbol;Acc:MGI:1921442]
Rnf4	ENSMUSG00000029110.10	15559.1	14903	13279.4	15561.9	13392.8	13597.1	12683.2	0.154646	0.0668235	0.459691	ring finger protein 4 [Source:MGI Symbol;Acc:MGI:1201691]
Cdh5	ENSMUSG00000031871.8	854.221	1912.59	8680.99	2583.26	1485.08	703.832	1185.75	0.37932	0.0668372	0.459691	cadherin 5 [Source:MGI Symbol;Acc:MGI:105057]
9430020K01Rik	ENSMUSG00000033960.5	872.636	2166.37	8436.29	2723.75	1367.65	835.988	1477.08	0.389104	0.0668394	0.459691	RIKEN cDNA 9430020K01 gene [Source:MGI Symbol;Acc:MGI:2685174]
Ces2g	ENSMUSG00000031877.8	95.1408	278.088	870.747	286.919	112.014	58.0686	281.128	0.406126	0.0668505	0.459691	carboxylesterase 2G [Source:MGI Symbol;Acc:MGI:1919611]
Heatr9	ENSMUSG00000018925.3	1269.57	978.171	801.892	1025.98	766.932	920.087	690.295	0.306454	0.0670082	0.460516	HEAT repeat containing 9 [Source:MGI Symbol;Acc:MGI:3650286]
Ift27	ENSMUSG00000016637.6	592.328	599.932	616.514	624.295	622.398	747.884	733.902	-0.198973	0.0671107	0.460789	intraflagellar transport 27 [Source:MGI Symbol;Acc:MGI:1914292]
Trbj1-5	ENSMUSG00000076487.1	1119.18	957.752	854.858	843.936	1126.46	1127.33	1109.67	-0.233075	0.0671236	0.460789	T cell receptor beta joining 1-5 [Source:MGI Symbol;Acc:MGI:4439566]
Spred2	ENSMUSG00000045671.14	879.797	924.693	917.356	868.671	797.645	835.988	728.335	0.17541	0.067306	0.461781	sprouty-related, EVH1 domain containing 2 [Source:MGI Symbol;Acc:MGI:2150019]
Spaca1	ENSMUSG00000028264.13	75.7035	76.8146	52.9652	97.948	119.24	119.141	99.2763	-0.399283	0.0673631	0.461799	sperm acrosome associated 1 [Source:MGI Symbol;Acc:MGI:1914902]
Ahnak2	ENSMUSG00000072812.4	0	27.2254	79.4477	49.4687	83.1068	95.1124	267.211	-0.327706	0.0674355	0.461799	AHNAK nucleoprotein 2 [Source:MGI Symbol;Acc:MGI:2144831]
Clasp1	ENSMUSG00000064302.10	2487.98	2413.34	2236.19	2261.71	2228.53	1892.24	2093.15	0.169589	0.0674747	0.461799	CLIP associating protein 1 [Source:MGI Symbol;Acc:MGI:1923957]
Gnptab	ENSMUSG00000035311.13	10809.2	8941.61	8499.85	9742.37	8691.89	8214.7	7853.03	0.187994	0.0675741	0.461799	N-acetylglucosamine-1-phosphate transferase, alpha and beta subunits [Source:MGI Symbol;Acc:MGI:3643902]
Tusc3	ENSMUSG00000039530.13	3669.57	3655.02	4311.36	3930.78	4178.83	4342.13	4277.23	-0.135811	0.0676299	0.461799	tumor suppressor candidate 3 [Source:MGI Symbol;Acc:MGI:1933134]
Tspan9	ENSMUSG00000030352.11	928.902	1586.85	6650.3	1859.03	1166.21	663.784	1204.3	0.395587	0.0676728	0.461799	tetraspanin 9 [Source:MGI Symbol;Acc:MGI:1924558]
Ccdc71	ENSMUSG00000049305.6	2456.27	2695.32	2295.51	2362.63	3010.82	3144.72	2429.95	-0.213741	0.0676883	0.461799	coiled-coil domain containing 71 [Source:MGI Symbol;Acc:MGI:1919704]
Rpl6	ENSMUSG00000029614.10	5745.28	6275.46	5666.21	5167.5	6140.87	6317.46	6581	-0.151867	0.0677265	0.461799	ribosomal protein L6 [Source:MGI Symbol;Acc:MGI:108057]
Rps26	ENSMUSG00000025362.5	967.777	999.563	914.179	855.809	1024.38	1044.23	1110.6	-0.178505	0.067733	0.461799	ribosomal protein S26 [Source:MGI Symbol;Acc:MGI:1351628]
Tollip	ENSMUSG00000025139.10	10459.4	9133.16	9611.06	9690.92	9145.37	8817.42	8452.4	0.13401	0.0677373	0.461799	toll interacting protein [Source:MGI Symbol;Acc:MGI:1891808]
Cdca7l	ENSMUSG00000021175.12	2157.55	1614.08	1614.38	1720.52	2023.47	2250.66	2050.47	-0.231993	0.0677986	0.461799	cell division cycle associated 7 like [Source:MGI Symbol;Acc:MGI:2384982]
Hsd17b4	ENSMUSG00000024507.6	2410.23	2567.94	3023.25	2898.87	3216.78	2864.38	3190.76	-0.180073	0.0677988	0.461799	hydroxysteroid (17-beta) dehydrogenase 4 [Source:MGI Symbol;Acc:MGI:105089]
Pycr2	ENSMUSG00000026520.8	2395.91	2570.86	2140.85	2595.13	2767.82	2816.33	2660.05	-0.17685	0.0678012	0.461799	pyrroline-5-carboxylate reductase family, member 2 [Source:MGI Symbol;Acc:MGI:1277956]
Syde1	ENSMUSG00000032714.6	142.2	232.389	773.291	299.78	187.894	150.177	216.181	0.432077	0.0678612	0.461949	synapse defective 1, Rho GTPase, homolog 1 (C. elegans) [Source:MGI Symbol;Acc:MGI:1918959]
Arpc5	ENSMUSG00000008475.10	53977.6	52133.8	47853	54901.4	56853.2	60456.4	55285.7	-0.141145	0.0679979	0.462418	actin related protein 2/3 complex, subunit 5 [Source:MGI Symbol;Acc:MGI:1915021]
Phldb2	ENSMUSG00000033149.13	485.934	1248.48	4550.77	1433.6	803.968	417.493	791.427	0.387514	0.0680426	0.462418	pleckstrin homology-like domain, family B, member 2 [Source:MGI Symbol;Acc:MGI:2444981]
Hist1h2bg	ENSMUSG00000058385.7	1465.99	1183.33	1260.57	1618.62	1102.97	1299.54	887.919	0.286558	0.0680464	0.462418	histone cluster 1, H2bg [Source:MGI Symbol;Acc:MGI:2448386]
Adora2a	ENSMUSG00000020178.5	11195.9	11001	10122.7	9610.78	11228.5	13318.7	11131	-0.179171	0.0680819	0.462418	adenosine A2a receptor [Source:MGI Symbol;Acc:MGI:99402]
Plxnb3	ENSMUSG00000031385.11	89.0027	61.2572	87.9222	132.576	66.8468	59.0698	43.6073	0.42332	0.0682821	0.463313	plexin B3 [Source:MGI Symbol;Acc:MGI:2154240]
Diap3	ENSMUSG00000022021.10	167.775	68.0636	102.752	167.204	180.667	187.221	237.521	-0.420413	0.0682897	0.463313	diaphanous homolog 3 (Drosophila) [Source:MGI Symbol;Acc:MGI:1927222]
Smim15	ENSMUSG00000071180.4	3577.5	3381.79	3854.8	3816.02	3902.41	4100.84	3946.93	-0.126632	0.0683324	0.463344	small integral membrane protein 15 [Source:MGI Symbol;Acc:MGI:1922866]
Capn1	ENSMUSG00000024942.13	12307.9	12830	10837.7	11211.6	13079.4	13929.5	12605.3	-0.161678	0.0685154	0.464101	calpain 1 [Source:MGI Symbol;Acc:MGI:88263]
Srebf1	ENSMUSG00000020538.12	6711.01	7240.02	6789.07	7160.1	7417.28	7765.17	7373.35	-0.111931	0.0685201	0.464101	sterol regulatory element binding transcription factor 1 [Source:MGI Symbol;Acc:MGI:107606]
Yes1	ENSMUSG00000014932.12	265.985	354.903	1431.12	518.432	355.914	277.328	363.704	0.431465	0.0685708	0.464165	Yamaguchi sarcoma viral (v-yes) oncogene homolog 1 [Source:MGI Symbol;Acc:MGI:99147]
Rbm19	ENSMUSG00000029594.9	895.142	827.459	748.927	807.329	776.868	611.723	668.027	0.232559	0.0686057	0.464165	RNA binding motif protein 19 [Source:MGI Symbol;Acc:MGI:1921361]
Pltp	ENSMUSG00000017754.10	2518.67	6758.72	23462.5	8265.23	3855.43	2325.75	4379.29	0.384154	0.0688434	0.46529	phospholipid transfer protein [Source:MGI Symbol;Acc:MGI:103151]
Frrs1	ENSMUSG00000033386.7	536.062	649.521	565.668	647.051	689.245	662.783	763.592	-0.222055	0.0688497	0.46529	ferric-chelate reductase 1 [Source:MGI Symbol;Acc:MGI:108076]
Rap1a	ENSMUSG00000068798.7	10983.1	11061.3	12669.3	12227.7	13203.1	13272.7	12145.1	-0.136886	0.0688866	0.46529	RAS-related protein-1a [Source:MGI Symbol;Acc:MGI:97852]
Rps3	ENSMUSG00000030744.9	11068	12188.2	11070.8	10851.5	12167	11773.9	13050.7	-0.12883	0.0690805	0.466119	ribosomal protein S3 [Source:MGI Symbol;Acc:MGI:1350917]
Srrd	ENSMUSG00000029346.9	1002.56	841.072	877.103	845.915	664.855	858.014	702.356	0.238695	0.0690858	0.466119	SRR1 domain containing [Source:MGI Symbol;Acc:MGI:1917368]
Iqgap3	ENSMUSG00000028068.11	4.09208	21.3914	88.9815	45.5112	83.1068	95.1124	146.595	-0.377877	0.0691407	NA	IQ motif containing GTPase activating protein 3 [Source:MGI Symbol;Acc:MGI:3028642]
Asap2	ENSMUSG00000052632.12	456.267	400.603	526.474	411.58	392.047	365.432	342.364	0.255906	0.0691561	0.46615	ArfGAP with SH3 domain, ankyrin repeat and PH domain 2 [Source:MGI Symbol;Acc:MGI:2685438]
Bahcc1	ENSMUSG00000039741.12	74.6804	98.2061	175.844	105.863	69.5568	55.0651	83.5034	0.421555	0.069167	0.46615	BAH domain and coiled-coil containing 1 [Source:MGI Symbol;Acc:MGI:2679272]
Casc3	ENSMUSG00000078676.6	10108.5	8818.13	9207.46	8944.93	8078.53	8874.48	8005.19	0.145967	0.0692188	0.466242	cancer susceptibility candidate 3 [Source:MGI Symbol;Acc:MGI:2179723]
Gm29322	ENSMUSG00000099543.1	97.1869	50.5615	55.0838	83.1074	43.3601	49.058	36.1848	0.424922	0.0693429	NA	NA
Slc25a11	ENSMUSG00000014606.11	6326.35	7518.11	5973.41	6767.32	7519.36	7841.26	7229.54	-0.177066	0.0693621	0.466949	solute carrier family 25 (mitochondrial carrier oxoglutarate carrier), member 11 [Source:MGI Symbol;Acc:MGI:1915113]
Ccs	ENSMUSG00000034108.5	928.902	1026.79	980.915	792.489	1007.22	1131.34	1126.37	-0.21381	0.0694412	0.466974	copper chaperone for superoxide dismutase [Source:MGI Symbol;Acc:MGI:1333783]
Trafd1	ENSMUSG00000042726.11	5792.34	5857.36	5618.54	6088.61	5604.29	4924.82	5358.13	0.132113	0.0694426	0.466974	TRAF type zinc finger domain containing 1 [Source:MGI Symbol;Acc:MGI:1923551]
Zc3h3	ENSMUSG00000075600.2	1140.67	1113.33	1081.55	1180.32	996.379	1053.24	952.867	0.162289	0.0695039	0.467129	zinc finger CCCH type containing 3 [Source:MGI Symbol;Acc:MGI:2663721]
Nup93	ENSMUSG00000032939.10	3404.61	3199.96	3403.54	3695.31	3738	3782.47	3705.7	-0.130102	0.0695859	0.467422	nucleoporin 93 [Source:MGI Symbol;Acc:MGI:1919055]
Cdk5	ENSMUSG00000028969.7	1783.12	2169.28	1927.93	1808.58	2142.71	2151.54	2194.28	-0.168743	0.0696554	0.467558	cyclin-dependent kinase 5 [Source:MGI Symbol;Acc:MGI:101765]
Tns3	ENSMUSG00000020422.10	138.108	394.769	1373.92	535.251	328.814	154.182	339.58	0.417953	0.0696829	0.467558	tensin 3 [Source:MGI Symbol;Acc:MGI:2443012]
Gm12758	ENSMUSG00000085105.1	49.1049	53.4786	80.507	60.3518	40.6501	40.0473	35.257	0.412416	0.0698189	NA	predicted gene 12758 [Source:MGI Symbol;Acc:MGI:3702543]
Lypd6b	ENSMUSG00000026765.9	9.20718	9.72337	59.321	9.89374	35.2301	18.0213	173.502	-0.337938	0.0698446	NA	LY6/PLAUR domain containing 6B [Source:MGI Symbol;Acc:MGI:1919147]
BC028528	ENSMUSG00000038543.10	83.8876	213.914	963.966	258.227	175.247	99.1171	191.13	0.405914	0.0698826	0.468426	cDNA sequence BC028528 [Source:MGI Symbol;Acc:MGI:2385885]
Cav2	ENSMUSG00000000058.6	2021.49	4772.23	19961.5	7153.18	3348.66	1522.8	3149.01	0.370779	0.0700007	0.468426	caveolin 2 [Source:MGI Symbol;Acc:MGI:107571]
Bzrap1	ENSMUSG00000034156.13	548.339	251.835	411.01	344.302	137.307	216.255	364.632	0.420092	0.0700497	0.468426	benzodiazepine receptor associated protein 1 [Source:MGI Symbol;Acc:MGI:2450877]
Nrep	ENSMUSG00000042834.11	128.9	462.833	1744.67	681.679	250.224	128.151	312.674	0.366313	0.070128	0.468426	neuronal regeneration related protein [Source:MGI Symbol;Acc:MGI:99444]
Dock4	ENSMUSG00000035954.9	160.614	240.167	902.526	327.483	214.09	70.0828	266.283	0.417213	0.0701461	0.468426	dedicator of cytokinesis 4 [Source:MGI Symbol;Acc:MGI:1918006]
Epha4	ENSMUSG00000026235.11	12.2762	83.621	379.23	126.64	64.1368	26.0308	44.5351	0.363913	0.0701511	0.468426	Eph receptor A4 [Source:MGI Symbol;Acc:MGI:98277]
Tmem138	ENSMUSG00000024666.5	534.016	598.96	618.633	570.869	691.051	684.809	622.564	-0.193847	0.0701666	0.468426	transmembrane protein 138 [Source:MGI Symbol;Acc:MGI:1920232]
Dock8	ENSMUSG00000052085.6	18534	16453.9	14904.4	15487.7	18412.7	18209.5	18479.3	-0.166198	0.0701863	0.468426	dedicator of cytokinesis 8 [Source:MGI Symbol;Acc:MGI:1921396]
Hdac7	ENSMUSG00000022475.15	5964.2	6799.55	8896.03	6741.6	5485.95	6157.27	6247.91	0.225639	0.0701878	0.468426	histone deacetylase 7 [Source:MGI Symbol;Acc:MGI:1891835]
Glipr1	ENSMUSG00000056888.8	2205.63	2296.66	1937.47	2135.07	2693.75	2686.17	2130.26	-0.214131	0.070202	0.468426	GLI pathogenesis-related 1 (glioma) [Source:MGI Symbol;Acc:MGI:1920940]
Zfp703	ENSMUSG00000085795.4	1300.26	1251.4	1224.55	1503.85	1093.04	1106.31	1219.15	0.19584	0.0702367	0.468426	zinc finger protein 703 [Source:MGI Symbol;Acc:MGI:2662729]
Atp5c1	ENSMUSG00000025781.11	10779.6	11942.2	11408.7	10873.2	12320.6	12978.3	11551.3	-0.129746	0.0702734	0.468426	ATP synthase, H+ transporting, mitochondrial F1 complex, gamma polypeptide 1 [Source:MGI Symbol;Acc:MGI:1261437]
Cast	ENSMUSG00000021585.8	17332	14874.8	15069.6	16318.7	16732.5	18103.4	17897.6	-0.145453	0.0704624	0.469177	calpastatin [Source:MGI Symbol;Acc:MGI:1098236]
Atp6v0e2	ENSMUSG00000039347.5	226.087	432.69	1258.45	368.047	317.974	216.255	349.786	0.428162	0.0705088	0.469177	ATPase, H+ transporting, lysosomal V0 subunit E2 [Source:MGI Symbol;Acc:MGI:1923502]
A230072C01Rik	ENSMUSG00000086877.4	145.269	124.459	139.828	140.491	164.407	194.229	167.007	-0.303238	0.0705133	0.469177	RIKEN cDNA A230072C01 gene [Source:MGI Symbol;Acc:MGI:2444644]
Exoc3l	ENSMUSG00000043251.5	148.338	395.741	1310.36	588.678	357.721	200.237	313.602	0.422292	0.0706126	0.469177	exocyst complex component 3-like [Source:MGI Symbol;Acc:MGI:3041195]
Zfp946	ENSMUSG00000071266.10	449.106	438.524	469.271	566.911	467.024	326.386	317.313	0.311974	0.0706413	0.469177	zinc finger protein 946 [Source:MGI Symbol;Acc:MGI:1921399]
Piga	ENSMUSG00000031381.12	1437.34	1154.16	1335.78	1230.78	1175.24	1036.22	1119.87	0.197688	0.0706827	0.469177	phosphatidylinositol glycan anchor biosynthesis, class A [Source:MGI Symbol;Acc:MGI:99461]
Vamp2	ENSMUSG00000020894.13	20092.1	16144.7	15863.1	17755.3	13755.1	16363.3	15129.9	0.195466	0.0707028	0.469177	vesicle-associated membrane protein 2 [Source:MGI Symbol;Acc:MGI:1313277]
Cyp2j6	ENSMUSG00000052914.4	83.8876	161.408	403.594	175.119	61.4268	50.0591	170.718	0.417442	0.0707437	0.469177	cytochrome P450, family 2, subfamily j, polypeptide 6 [Source:MGI Symbol;Acc:MGI:1270148]
Daam1	ENSMUSG00000034574.9	683.377	840.099	1576.24	862.734	605.235	560.662	870.291	0.384945	0.0707594	0.469177	dishevelled associated activator of morphogenesis 1 [Source:MGI Symbol;Acc:MGI:1914596]
[truncated: 12,554 more rows]
