# Supplementary material for: Restoration of Natural Killer Cell Antimetastatic Activity by IL12 and Checkpoint Blockade
Source: Oxford University Press journal article supplement (doi:10.1158/0008-5472.can-17-1032), 2017-10-17
Supplement: 00085472can171032-sup-181618_2_supp_4319492_dxk9hd.xlsx [file 00085472can171032-sup-181618_2_supp_4319492_dxk9hd.xlsx]

## Sheet: Sheet1
Cytotoxic mediators
Gene name	FC: Ctrl / IL-12	pValue	Ctrl (1)	Ctrl (2)	Ctrl (3)	IL-12 (1)	IL-12 (2)	IL-12 (3)
Prf1	-1.746	0.004315	53780	53990	22270	151700	151500	127000
Gzmk	-1.416	0.003351	179.1	265.3	341.8	736.9	618.1	678.6
Adhesion molecules
Gene name	FC: Ctrl / IL-12	pValue	Ctrl (1)	Ctrl (2)	Ctrl (3)	IL-12 (1)	IL-12 (2)	IL-12 (3)
Itgax	-2.279	3.09e-07	618.3	453	359.4	1726	2558	2532
Icam1	-1.806	0.00021	4283	5820	2570	18780	12260	12590
Itgb2	-1.484	0.009369	40820	38350	19530	87730	99600	84440
Itgb7	-1.119	0.03109	7509	7640	2288	14010	12240	11200
Itgam	-0.9911	0.04235	6030	6504	3438	5754	12100	13300
Itga4	1.078	0.01281	5588	3419	3021	1337	2155	2099
Icam2	2.023	4.37e-05	1715	3120	6029	1136	797.1	641.7
Inhibitory and activating receptors
Gene name	FC: Ctrl / IL-12	pValue	Ctrl (1)	Ctrl (2)	Ctrl (3)	IL-12 (1)	IL-12 (2)	IL-12 (3)
Pdcd1	-8.132	2.284e-19	0	8.474	1.036	1460	771.8	591.1
Tnfsf4	-7.698	4.269e-19	0.6585	14.34	1.036	1270	1085	1112
Lag3	-4.262	2.485e-14	169.2	46.28	133.6	2743	1798	2006
Tigit	-2.328	1.398e-06	129.7	224.9	237.2	1116	840.4	928.8
Cd69	-2.019	3.847e-06	1468	1400	1335	8181	4166	4347
Tnfrsf9	-1.198	0.005348	1048	582.1	946.6	2340	1950	1481
Cd160	-1.198	0.0142	479.4	388.5	1136	2042	1241	1147
Klrg1	-1.772	0.0004904	8213	5707	12100	35590	27310	23320
Cd38	-1.409	0.002758	1213	2220	953.9	2417	5210	3784
Cd226	-0.9219	0.02657	1196	1429	1001	1666	2363	2691
Klrk1	-0.4305	0.344	13930	12950	12880	19380	17230	15770
Tnfrsf18	1.186	0.02477	2928	2275	9994	2679	2017	1703
Klrb1a	1.308	0.004076	3679	2418	7248	1929	1777	1494
Chemokines, cytokines and receptors
Gene name	FC: Ctrl / IL-12	pValue	Ctrl (1)	Ctrl (2)	Ctrl (3)	IL-12 (1)	IL-12 (2)	IL-12 (3)
Il10	-10.24	5.542e-38	0.6585	11.08	1.036	6577	4392	5360
Csf2	-4.38	8.241e-17	88.24	55.41	156.4	2575	1778	1673
Cxcr6	-3.712	3.735e-10	79.02	346.1	101.5	2120	2639	2017
Cx3cr1	-3.473	2.122e-12	387.8	1017	585.2	6312	6746	8502
Il2ra	-3.023	0.0003863	38.19	62.58	7.25	138.7	386.7	348.5
Ifng	-2.468	3.144e-08	1871	1401	2131	12720	7660	8755
Ccr5	-1.861	0.0001137	2641	4157	1484	8946	9924	10720
Il12rb1	-1.542	0.0003518	865.9	700.7	484.7	1761	1840	2268
Il12rb2	-1.05	0.0495	2941	4301	1096	3059	6675	7273
Il27ra	-0.9681	0.03357	2238	1944	819.2	3411	3525	2724
Irf2	-0.8339	0.03881	1756	1646	1277	2267	2839	3061
Cxcr4	1.25	0.04808	277.2	614.7	490.9	314.1	58.05	195
Il4ra	1.346	0.005584	834.3	1686	714.6	545.8	331.1	373.1
Il1b	1.852	0.01502	144.2	1511	1151	530.8	103	122.1
Ccl6	2.178	2.349e-05	879.1	2474	3423	632.7	381.8	430.6
Ccr7	2.433	0.002047	320	797.9	105.6	133.4	31.88	59.11
Cxcl12	2.826	9.76e-05	456.3	2716	448.4	249.6	68.67	185
